# Supplementary material for: A monoacylglycerol lipase inhibitor showing therapeutic efficacy in mice without central side effects or dependence
Source: Springer Nature journal article supplement (doi:10.1038/s41467-023-43606-3), 2023-12-05

**SUPPORTING INFORMATION**  
**for**

**A monoacylglycerol lipase inhibitor showing therapeutic efficacy in mice  
without central side effects or dependence**

Ming Jiang<sup>1†</sup>, Mirjam C. W. Huizenga<sup>1†</sup>, Jonah L. Wirt<sup>2†</sup>, Janos Paloczi<sup>3</sup>, Avand Amedi<sup>1</sup>, Richard J. B. H. N. van der Berg<sup>4</sup>, Joerg Benz<sup>5</sup>, Ludovic Collin<sup>5</sup>, Hui Deng<sup>1</sup>, Xinyu Di<sup>6</sup>, Wouter F. Driever<sup>1</sup>, Bogdan F. Florea<sup>4</sup>, Uwe Grether<sup>5</sup>, Antonius P. A. Janssen<sup>1</sup>, Thomas Hankemeier<sup>6</sup>, Laura H. Heitman<sup>7</sup>, Tsang-Wai Lam<sup>8</sup>, Florian Mohr<sup>1</sup>, Anto Pavlovic<sup>5</sup>, Iris Ruf<sup>5</sup>, Helma van den Hurk<sup>8</sup>, Anna F. Stevens<sup>1</sup>, Daan van der Vliet<sup>1</sup>, Tom van der Wel<sup>1</sup>, Matthias B. Wittwer<sup>5</sup>, Constant A.A. van Boeckel<sup>1</sup>, Pal Pacher<sup>3</sup>, Andrea G. Hohmann<sup>2\*</sup>, Mario van der Stelt<sup>1\*</sup>

<sup>1</sup>*Department of Molecular Physiology, Leiden University & Oncode Institute, Netherlands;* <sup>2</sup>*Department of Psychological and Brain Sciences, Program in Neuroscience, Gill Center for Biomolecular Science, Indiana University, Bloomington, IN, USA;* <sup>3</sup>*Laboratory of Cardiovascular Physiology and Tissue Injury, National Institute of Health/NIAAA, Rockville, Maryland, USA;* <sup>4</sup>*Department of Bio-organic Synthesis, Leiden University, Netherlands;* <sup>5</sup>*Roche Innovation Center Basel, F. Hoffmann-La Roche Ltd., Basel, Switzerland;* <sup>6</sup>*Metabolomics and analytics center, Leiden University, Netherlands;* <sup>7</sup>*Division of Drug Discovery and Safety, Leiden University & Oncode Institute, Netherlands;* <sup>8</sup>*Pivot Park Screening Centre, Oss, Netherlands*

\*Corresponding authors: [m.van.der.stelt@chem.leidenuniv.nl](mailto:m.van.der.stelt@chem.leidenuniv.nl); [hohmanna@indiana.edu](mailto:hohmanna@indiana.edu)

†These authors contributed equally to this work

**Supplementary Table 1 – High-throughput screening (HTS) data of the hMAGL activity assay.**

| Category          | Parameter               | Description                                                                                                                                                                                                                                                                                                                                                                                                                                                                                                                                                                                                                                                                                                                                                                                                                                                                                                                               |
|-------------------|-------------------------|-------------------------------------------------------------------------------------------------------------------------------------------------------------------------------------------------------------------------------------------------------------------------------------------------------------------------------------------------------------------------------------------------------------------------------------------------------------------------------------------------------------------------------------------------------------------------------------------------------------------------------------------------------------------------------------------------------------------------------------------------------------------------------------------------------------------------------------------------------------------------------------------------------------------------------------------|
| Assay             | Type of assay           | <i>In vitro</i> enzyme fluorescence-based activity assay                                                                                                                                                                                                                                                                                                                                                                                                                                                                                                                                                                                                                                                                                                                                                                                                                                                                                  |
|                   | Target                  | MAGL (human)                                                                                                                                                                                                                                                                                                                                                                                                                                                                                                                                                                                                                                                                                                                                                                                                                                                                                                                              |
|                   | Primary measurement     | MAGL-mediated hydrolysis of 2-arachidonoylglycerol (2-AG), coupled to an enzymatic cascade reaction that ultimately converts Amplex™ Red into fluorescent resorufin.                                                                                                                                                                                                                                                                                                                                                                                                                                                                                                                                                                                                                                                                                                                                                                      |
|                   | Key reagents            | Membrane fractions of hMAGL-FLAG-overexpressing HEK293T cells; 2-AG (Cayman); glycerol kinase (GK); glycerol-3-phosphate oxidase (GPO); horseradish peroxidase (HRP); ATP; Amplex™ Red (all Sigma Aldrich).                                                                                                                                                                                                                                                                                                                                                                                                                                                                                                                                                                                                                                                                                                                               |
|                   | Assay protocol          | 1x Assay buffer (50 mM HEPES pH 7.4, 1 mM EDTA, 5 mM MgCl <sub>2</sub> , 100 mM NaCl, 0.5% (w/w) BSA, 0.03% (w/w) Tween-20.<br><br>Method:<br><ol style="list-style-type: none"> <li>1. Add 20 nL of compound (final concentration 10 μM, final DMSO concentration 0.5%)</li> <li>2. Add 20 nL of DMSO to negative control (min) wells or 20 nL of JZL184 to positive control (max) wells (final concentration 20 μM; 0.5% DMSO).</li> <li>3. Add 1 μL of assay buffer to all wells.</li> <li>4. Add 2 μL of hMAGL membranes in assay buffer (final concentration 9 ng/μL).</li> <li>5. Incubate for 30 min at rt.</li> <li>6. Add 1 μL of substrate mix in assay buffer (final concentrations 0.2 U/mL GK, GPO and HRP, 125 μM ATP, 10 μM Amplex™ Red, 25 μM 2-AG).</li> <li>7. Incubate for 45 min at rt in the dark.</li> <li>8. Read fluorescence intensity (excitation 531 nm, emission 595 nm) on Envision plate reader.</li> </ol> |
| Library           | Library size            | 233,820 compounds                                                                                                                                                                                                                                                                                                                                                                                                                                                                                                                                                                                                                                                                                                                                                                                                                                                                                                                         |
|                   | Source                  | Cancer Drug Discovery Initiative ( <a href="https://cddi.nl">https://cddi.nl</a> ), performed at Pivot Park Screening Centre B.V. in Oss, The Netherlands.                                                                                                                                                                                                                                                                                                                                                                                                                                                                                                                                                                                                                                                                                                                                                                                |
| Screen            | Format                  | Black 1536-well plate (Corning #3724)                                                                                                                                                                                                                                                                                                                                                                                                                                                                                                                                                                                                                                                                                                                                                                                                                                                                                                     |
|                   | Concentration(s) tested | 10 μM, final DMSO concentration 0.5%                                                                                                                                                                                                                                                                                                                                                                                                                                                                                                                                                                                                                                                                                                                                                                                                                                                                                                      |
|                   | Plate controls          | DMSO for the minimum effect (0% inhibition), 20 μM JZL184 for the maximum effect (100% inhibition).                                                                                                                                                                                                                                                                                                                                                                                                                                                                                                                                                                                                                                                                                                                                                                                                                                       |
|                   | Dispensing system       | Echo-555 for dispensing DMSO or compounds; BioRAPTR for dispensing 1 μL assay buffer; Multidrop-Combi for dispensing 2 μL hMAGL-membranes; Certus for dispensing 1 μL substrate mix.                                                                                                                                                                                                                                                                                                                                                                                                                                                                                                                                                                                                                                                                                                                                                      |
|                   | Detection instrument    | Envision reader (Perkin Elmer)                                                                                                                                                                                                                                                                                                                                                                                                                                                                                                                                                                                                                                                                                                                                                                                                                                                                                                            |
|                   | Assay validation / QC   | Over 188 plates, the Z'-factor varied from 0.61 to 0.90 and the S/B-ratio from 4.16 to 10.25.                                                                                                                                                                                                                                                                                                                                                                                                                                                                                                                                                                                                                                                                                                                                                                                                                                             |
| Post-HTS analysis | Hit criteria            | Z-score < -4.95 (z-score = $X - \mu/\sigma$ ) where X = measured effect (residual activity), $\mu$ = mean effect, $\sigma$ = standard deviation.                                                                                                                                                                                                                                                                                                                                                                                                                                                                                                                                                                                                                                                                                                                                                                                          |
|                   | Hit rate                | 0.67% (1,555 compounds with ≤ 50% residual activity).                                                                                                                                                                                                                                                                                                                                                                                                                                                                                                                                                                                                                                                                                                                                                                                                                                                                                     |

|                                          |                                                                                                                                                                                                                                                                                                                                                                                                                                                                                                                                                                                                                                                                                                                                                                                                                                                                                                                                                                                                                                                                             |
|------------------------------------------|-----------------------------------------------------------------------------------------------------------------------------------------------------------------------------------------------------------------------------------------------------------------------------------------------------------------------------------------------------------------------------------------------------------------------------------------------------------------------------------------------------------------------------------------------------------------------------------------------------------------------------------------------------------------------------------------------------------------------------------------------------------------------------------------------------------------------------------------------------------------------------------------------------------------------------------------------------------------------------------------------------------------------------------------------------------------------------|
| Additional assay(s)                      | <p>The primary assay identified 1,555 active hits, which were expanded to 4,389 compounds using a nearest neighbor clustering algorithm. These compounds were then tested again in the primary assay (confirmation assay), resulting in 1,142 confirmed actives. As a deselection assay, the primary assay was repeated but with 12.5 <math>\mu</math>M glycerol replacing 2-AG as the substrate. Deselection (&lt; 10% inhibition in deselection assay) resulted in 334 remaining compounds. Using a more stringent cutoff (&gt; 60% inhibition in primary assay), this number was reduced to 111 compounds. A triaging process, involved examination of intellectual property and an apparent reversible mode of action, judged by the absence of structural motifs that are commonly present in irreversible serine hydrolase inhibitors, such as lactones and activated ureas and carbamates. The remaining 50 actives were then measured in dose-response experiments (7 equidistant concentration steps from 10 <math>\mu</math>M to 10 nM) in the primary assay.</p> |
| Confirmation of hit purity and structure | <p>Compounds were checked for correct MW and purity (&gt;90%) by LC-MS analysis.</p>                                                                                                                                                                                                                                                                                                                                                                                                                                                                                                                                                                                                                                                                                                                                                                                                                                                                                                                                                                                        |

---

**Supplementary Table 2 – Qualified hit list.** Hits are clustered by chemotype. Purity (> 90%) and mass were confirmed by LC-MS. Deviations from expected mass are shown as  $\Delta MW$ .  $pIC_{50}$  values were determined in end point measurement after 45 min. Percentages inhibition in orthogonal ABPP assay are relative to vehicle-treated controls. Physicochemical properties (cLogP, tPSA, HBD, HBA) were calculated using ChemDraw Professional 16.0. MW: molecular weight; tPSA: topological polar surface area; HBD: number of hydrogen bond donors; HBA: number of hydrogen bond acceptors; LipE: lipophilic efficiency (LipE =  $pIC_{50}$  primary assay – cLogP); LE: ligand efficiency ( $LE = 1.4 \times pIC_{50}/N$  where N = number of non-hydrogen atoms).

| Cluster                | Compound | Structure                                                                           | MW (Da) | Confirmed purity | Matching mass | $\Delta$ MW (Da) | pIC <sub>50</sub> primary assay | Inhibition ABPP assay (%) | cLog P | tPSA (Å <sup>2</sup> ) | HBD | HBA | LipE | LE   |
|------------------------|----------|-------------------------------------------------------------------------------------|---------|------------------|---------------|------------------|---------------------------------|---------------------------|--------|------------------------|-----|-----|------|------|
| Singleton              | 1        | 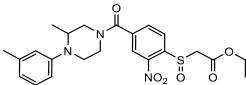   | 474     | Yes              | Yes           | -                | 6.2                             | 86                        | 3.09   | 135.8                  | 0   | 7   | 3.1  | 0.30 |
| Benzoxazine derivative | 4        |    | 346     | Yes              | Yes           | -                | 5.5                             | -3                        | 3.16   | 58.6                   | 1   | 3   | 2.3  | 0.29 |
| Benzoxazine derivative | 5        |    | 350     | No               | Yes           | -                | 6.8                             | -2                        | 2.92   | 58.6                   | 1   | 3   | 3.8  | 0.36 |
| Benzoxazine derivative | 6        |    | 419     | Yes              | Yes           | -                | 6.5                             | 17                        | 3.13   | 61.9                   | 2   | 5   | 3.3  | 0.27 |
| Benzoxazine derivative | 7        |    | 449     | Yes              | Yes           | -                | 6.1                             | 13                        | 3.86   | 67.9                   | 2   | 6   | 2.2  | 0.31 |
| Benzoxazine derivative | 8        |    | 453     | Yes              | Yes           | -                | 6.0                             | -6                        | 3.56   | 49.9                   | 1   | 3   | 2.4  | 0.29 |
| Benzoxazine derivative | 9        |    | 314     | Yes              | Yes           | -                | 5.6                             | 2                         | 1.58   | 78.4                   | 2   | 3   | 4.0  | 0.37 |
| Carbamate              | 10       |   | 334     | Yes              | Yes           | -                | 5.4                             | -4                        | 2.12   | 106.1                  | 1   | 3   | 3.3  | 0.30 |
| Carbamate              | 11       |  | 360     | Yes              | Yes           | -                | 5.8                             | 2                         | 3.83   | 54.3                   | 1   | 7   | 2.0  | 0.30 |
| Fused imidazopyridine  | 12       |  | 370     | No               | Yes           | -                | 6.0                             | -13                       | 5.16   | 71.7                   | 1   | 4   | 0.9  | 0.27 |
| Fused imidazopyridine  | 13       |  | 399     | Yes              | Yes           | -                | 6.2                             | 2                         | 6.30   | 60.7                   | 1   | 4   | -0.1 | 0.27 |
| Fused imidazopyridine  | 14       |  | 426     | Yes              | Yes           | -                | 6.3                             | -11                       | 5.77   | 63.9                   | 1   | 4   | 0.6  | 0.33 |
| Fused imidazopyridine  | 15       |  | 440     | Yes              | Yes           | -                | 6.0                             | -12                       | 6.04   | 63.9                   | 2   | 4   | 0.0  | 0.29 |

| Cluster           | Compound | Structure | MW<br>(Da) | Confirmed<br>purity | Confirmed<br>mass | $\Delta$ MW<br>(Da) | pIC <sub>50</sub><br>primary<br>assay | Inhibition<br>ABPP<br>assay (%) | cLog<br>P | tPSA<br>(Å <sup>2</sup> ) | HBD | HBA | LipE | LE   |
|-------------------|----------|-----------|------------|---------------------|-------------------|---------------------|---------------------------------------|---------------------------------|-----------|---------------------------|-----|-----|------|------|
| Imidazopiperidine | 16       |           | 370        | Yes                 | No†               | +371                | 5.5                                   | 10                              | 3.56      | 56.7                      | 1   | 3   | 2.0  | 0.23 |
| Imidazopiperidine | 17       |           | 428        | Yes                 | Yes               | -                   | 5.7                                   | 17                              | 3.88      | 66.3                      | 1   | 4   | 1.8  | 0.26 |
| Imidazopiperidine | 18       |           | 377        | Yes                 | Yes               | -                   | 5.8                                   | 9                               | 4.00      | 57.1                      | 0   | 2   | 1.8  | 0.45 |
| Imidazopiperidine | 19       |           | 390        | Yes                 | Yes               | -                   | 6.3                                   | 6                               | 3.87      | 66.3                      | 0   | 6   | 2.4  | 0.26 |
| Imidazopyridines  | 20       |           | 243        | Yes                 | Yes               | -                   | 5.4                                   | -10                             | 4.72      | 15.6                      | 0   | 4   | 0.7  | 0.33 |
| Imidazopyridines  | 21       |           | 257        | Yes                 | Yes               | -                   | 5.4                                   | 4                               | 5.26      | 15.6                      | 0   | 6   | 0.1  | 0.34 |
| Imidazopyridines  | 22       |           | 263        | Yes                 | Yes               | -                   | 5.6                                   | 10                              | 4.94      | 15.6                      | 0   | 3   | 0.7  | 0.31 |
| Naphtyl amide     | 23       |           | 359        | No                  | No                | +113                | 5.7                                   | -9                              | 3.14      | 61.8                      | 1   | 3   | 2.5  | 0.32 |
| Naphtyl amide     | 24       |           | 346        | Yes                 | No                | +28                 | 5.8                                   | 51                              | 3.96      | 32.8                      | 0   | 2   | 1.8  | 0.35 |
| Naphtyl amide     | 25       |           | 336        | No                  | Yes               | -                   | 6.2                                   | 16                              | 4.97      | 23.6                      | 0   | 2   | 1.3  | 0.26 |
| Naphtyl amide     | 26       |           | 344        | No                  | No                | +45                 | 4.9                                   | -4                              | 4.73      | 23.6                      | 2   | 5   | 0.2  | 0.30 |
| Naphtyl amide     | 27       |           | 308        | No                  | Yes               | -                   | 5.5                                   | -11                             | 3.77      | 23.6                      | 0   | 2   | 1.7  | 0.35 |
| Naphtyl amide     | 28       |           | 334        | Yes                 | Yes               | -                   | 5.3                                   | -7                              | 4.55      | 23.6                      | 2   | 4   | 0.7  | 0.29 |
| Naphtyl amide     | 29       |           | 365        | Yes                 | Yes               | -                   | 5.4                                   | 24                              | 4.94      | 23.6                      | 0   | 6   | 0.5  | 0.27 |
| Naphtyl amide     | 30       |           | 439        | Yes                 | Yes               | -                   | 6.2                                   | -17                             | 4.92      | 32.8                      | 4   | 6   | 1.3  | 0.26 |
| Naphtyl amide     | 31       |           | 356        | Yes                 | Yes               | -                   | 5.7                                   | 69                              | 3.42      | 41.9                      | 1   | 4   | 2.3  | 0.33 |

41  
42

Supplementary Table 2 – Qualified hit list (continued).

| Cluster          | Compound | Structure                                                                           | MW (Da) | Confirmed purity | Confirmed mass | ΔMW (Da) | pIC <sub>50</sub> primary assay | Inhibition ABPP assay (%) | cLog P | tPSA (Å²) | HBD | HBA | LipE | LE   |
|------------------|----------|-------------------------------------------------------------------------------------|---------|------------------|----------------|----------|---------------------------------|---------------------------|--------|-----------|-----|-----|------|------|
| Phenyl thiazole  | 32       | 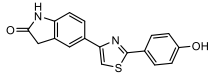   | 308     | Yes              | Yes            | -        | 5.8                             | 1                         | 2.96   | 61.7      | 1   | 6   | 2.9  | 0.25 |
| Phenyl thiazole  | 33       |    | 391     | Yes              | No             | +15      | 5.9                             | 11                        | 3.12   | 61.8      | 2   | 5   | 2.8  | 0.29 |
| Piperidine amide | 34       |    | 382     | No               | Yes            | -        | 5.6                             | 49                        | 3.43   | 57.1      | 1   | 5   | 2.2  | 0.30 |
| Piperidine amide | 35       |    | 465     | Yes              | Yes            | -        | 5.6                             | 16                        | 3.93   | 52.9      | 0   | 2   | 1.7  | 0.30 |
| Piperidine amide | 36       |    | 401     | Yes              | Yes            | -        | 5.8                             | 5                         | 2.13   | 62.1      | 2   | 5   | 3.7  | 0.25 |
| Singleton        | 37       |    | 326     | No               | Yes            | -        | 5.6                             | -1                        | 2.97   | 53.0      | 0   | 9   | 2.6  | 0.28 |
| Singleton        | 38       |    | 325     | Yes              | Yes            | -        | 5.5                             | -6                        | 3.39   | 44.8      | 0   | 4   | 2.1  | 0.80 |
| Singleton        | 39       |   | 450     | Yes              | Yes            | -        | 5.5                             | 18                        | 4.29   | 75.2      | 1   | 2   | 1.2  | 0.47 |
| Singleton        | 40       |  | 356     | Yes              | Yes            | -        | 5.5                             | 12                        | 4.08   | 73.1      | 1   | 5   | 1.5  | 0.30 |
| Singleton        | 41       |  | 413     | Yes              | Yes            | -        | 4.7                             | -3                        | 5.59   | 67.8      | 3   | 3   | -0.9 | 0.36 |
| Singleton        | 42       |  | 400     | No               | Yes            | -        | 5.7                             | 2                         | 3.18   | 106.3     | 0   | 2   | 2.5  | 0.42 |
| Singleton        | 43       |  | 449     | Yes              | Yes            | -        | 6.0                             | 6                         | 3.29   | 73.9      | 0   | 2   | 2.7  | 0.46 |
| Singleton        | 44       |  | 428     | No               | Yes            | -        | 5.5                             | 7                         | 2.94   | 49.9      | 1   | 3   | 2.6  | 0.42 |
| Singleton        | 45       |  | 155     | Yes              | No             | +205     | 5.7                             | 0                         | -1.12  | 51.2      | 1   | 3   | 6.8  | 0.34 |

43  
44

| Cluster     | Compound | Structure                                                                         | MW<br>(Da) | Confirmed<br>purity | Confirmed<br>mass | $\Delta$ MW<br>(Da) | pIC <sub>50</sub><br>primary<br>assay | Inhibition<br>ABPP<br>assay (%) | cLog<br>P | tPSA<br>(Å²) | HBD | HBA | LipE | LE   |
|-------------|----------|-----------------------------------------------------------------------------------|------------|---------------------|-------------------|---------------------|---------------------------------------|---------------------------------|-----------|--------------|-----|-----|------|------|
| Singleton   | 46       | 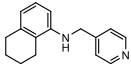 | 238        | Yes                 | Yes               | -                   | 6.0                                   | 62                              | 3.16      | 24.4         | 0   | 2   | 2.9  | 0.29 |
| Singleton   | 47       |  | 389        | Yes                 | Yes               | -                   | 5.9                                   | 46                              | 4.32      | 58.6         | 0   | 3   | 1.6  | 0.31 |
| Sulfonamide | 48       |  | 406        | Yes                 | Yes               | -                   | 5.5                                   | 18                              | 3.20      | 87.7         | 2   | 4   | 2.3  | 0.31 |
| Sulfonamide | 49       |  | 407        | No                  | Yes               | -                   | 6.1                                   | -7                              | 1.94      | 114.0        | 1   | 6   | 4.2  | 0.28 |
| Sulfonamide | 50       |  | 450        | No                  | No                | +22                 | 6.3                                   | 13                              | 5.08      | 92.4         | 1   | 6   | 1.2  | 0.26 |
| Sulfonamide | 51       |  | 338        | Yes                 | Yes               | -                   | 6.9                                   | 32                              | 1.54      | 66.5         | 0   | 3   | 5.3  | 0.30 |
| Sulfonamide | 52       |  | 379        | No                  | No                | +328                | 5.5                                   | 0                               | 4.20      | 87.6         | 2   | 7   | 1.3  | 0.26 |



| hMAGL-LEI-515 complex                                |                      |
|------------------------------------------------------|----------------------|
| <b>Data collection</b>                               |                      |
| Space group                                          | C222 <sub>1</sub>    |
| a, b, c (Å)                                          | 91.62, 127.57, 60.36 |
| α, β, γ (°)                                          | 90, 90, 90           |
| Resolution (Å)                                       | 1.55 (1.65-1.55)     |
| <i>R</i> <sub>sym</sub> or <i>R</i> <sub>merge</sub> | 0.063 (0.78)         |
| <i>I</i> / σ <i>I</i>                                | 11.69 (1.13)         |
| Completeness (%)                                     | 99.6 (99.4)          |
| CC <sub>1/2</sub>                                    | 0.99/0.59            |
| Redundancy                                           | 6.62 (6.16)          |
| <b>Refinement</b>                                    |                      |
| Resolution (Å)                                       | 48.3 – 1.55          |
| No. reflections                                      | 48898                |
| <i>R</i> <sub>work</sub> / <i>R</i> <sub>free</sub>  | 15.43/18.03          |
| <b>No. atoms</b>                                     |                      |
| Protein                                              | 2299                 |
| Water                                                | 325                  |
| Ligand                                               | 34                   |
| <b>B-factors (Å<sup>2</sup>)</b>                     |                      |
| Protein                                              | 25.56                |
| Water                                                | 47.53                |
| Ligand                                               | 33.07                |
| <b>R.m.s. deviations</b>                             |                      |
| Bond lengths (Å)                                     | 0.016                |
| Bond angles (°)                                      | 1.999                |
| PDB code                                             | 8AQF                 |

\*Values in parentheses are for highest resolution shell

**Supplementary Table 4 – Off-target pharmacology of LEI-515**

| Targets                                                         | LEI-515 (μM) | % Inhibition of Control Specific Binding |                 |       |
|-----------------------------------------------------------------|--------------|------------------------------------------|-----------------|-------|
|                                                                 |              | 1 <sup>st</sup>                          | 2 <sup>nd</sup> | Mean  |
| A2A(h) (agonist radioligand)                                    | 10           | 8.1                                      | 15.2            | 11.7  |
| α1A(h) (antagonist radioligand)                                 | 10           | 7.3                                      | -0.3            | 3.5   |
| α2A(h) (antagonist radioligand)                                 | 10           | 8.3                                      | 28.3            | 18.3  |
| β1(h) (agonist radioligand)                                     | 10           | 0.9                                      | 12.3            | 6.6   |
| β2(h) (antagonist radioligand)                                  | 10           | 25.6                                     | 28.0            | 26.8  |
| BZD (central) (agonist radioligand)                             | 10           | -32.5                                    | -13.0           | -22.7 |
| CB1(h) (agonist radioligand)                                    | 10           | 18.7                                     | 25.8            | 22.3  |
| CB2(h) (agonist radioligand)                                    | 10           | -8.9                                     | -14.9           | -11.9 |
| CCK1 (CCKA) (h) (agonist radioligand)                           | 10           | 13.3                                     | 25.8            | 19.5  |
| D1(h) (antagonist radioligand)                                  | 10           | 2.1                                      | 10.2            | 6.2   |
| D2S(h) (agonist radioligand)                                    | 10           | -3.4                                     | 7.7             | 2.2   |
| ETA(h) (agonist radioligand)                                    | 10           | -5.9                                     | -10.1           | -8.0  |
| NMDA (antagonist radioligand)                                   | 10           | 11.1                                     | 1.6             | 6.3   |
| H1(h) (antagonist radioligand)                                  | 10           | 12.5                                     | 3.7             | 8.1   |
| H2(h) (antagonist radioligand)                                  | 10           | -26.7                                    | -25.3           | -26.0 |
| MAO-A (antagonist radioligand)                                  | 10           | 4.9                                      | 7.4             | 6.1   |
| M1(h) (antagonist radioligand)                                  | 10           | -25.4                                    | -33.6           | -29.5 |
| M2 (h) (antagonist radioligand)                                 | 10           | -6.8                                     | -1.7            | -4.2  |
| M3(h) (antagonist radioligand)                                  | 10           | -24.6                                    | -15.2           | -19.9 |
| N neuronal α4β2 (h) (agonist radioligand)                       | 10           | -7.8                                     | -13.2           | -10.5 |
| δ (DOP) (h) (agonist radioligand)                               | 10           | 53.0                                     | 43.7            | 48.3  |
| kappa (h) (KOP) (agonist radioligand)                           | 10           | 62.3                                     | 56.8            | 59.5  |
| kappa (h) (KOP) (agonist radioligand)                           | 1            | 12.8                                     | 30.6            | 21.7  |
| μ (MOP) (h) (agonist radioligand)                               | 10           | 25.6                                     | 15.2            | 20.4  |
| 5-HT1A(h) (agonist radioligand)                                 | 10           | 8.8                                      | 12.4            | 10.6  |
| 5-HT1B (h) (antagonist radioligand)                             | 10           | 22.7                                     | 25.6            | 24.2  |
| 5-HT2A(h) (agonist radioligand)                                 | 10           | -5.5                                     | -5.5            | -5.5  |
| 5-HT2B(h) (agonist radioligand)                                 | 10           | 30.7                                     | 24.4            | 27.6  |
| 5-HT3(h) (antagonist radioligand)                               | 10           | -8.5                                     | -7.8            | -8.1  |
| GR (h) (agonist radioligand)                                    | 10           | 29.5                                     | 30.8            | 30.2  |
| AR(h) (agonist radioligand)                                     | 10           | -1.1                                     | -13.0           | -7.0  |
| V1a(h) (agonist radioligand)                                    | 10           | 13.1                                     | 6.8             | 9.9   |
| Ca2+ channel (L, dihydropyridine site) (antagonist radioligand) | 10           | 58.2                                     | 50.6            | 54.4  |
| Ca2+ channel (L, dihydropyridine site) (antagonist radioligand) | 1            | 18.1                                     | 19.6            | 18.9  |
| Potassium Channel hERG (human)- [ <sup>3</sup> H] Dofetilide    | 10           | 8.5                                      | 3.0             | 5.8   |
| KV channel (antagonist radioligand)                             | 10           | -1.2                                     | -8.1            | -4.7  |

|                                                           |    |       |       |       |
|-----------------------------------------------------------|----|-------|-------|-------|
| Na <sup>+</sup> channel (site 2) (antagonist radioligand) | 10 | 61.6  | 49.5  | 55.6  |
| Na <sup>+</sup> channel (site 2) (antagonist radioligand) | 1  | 12.6  | -1.9  | 5.3   |
| norepinephrine transporter(h) (antagonist radioligand)    | 10 | 24.9  | 25.7  | 25.3  |
| dopamine transporter(h) (antagonist radioligand)          | 10 | 47.6  | 42.8  | 45.2  |
| 5-HT transporter (h) (antagonist radioligand)             | 10 | 10.3  | -2.0  | 4.2   |
| COX1(h)                                                   | 10 | 13.4  | -2.5  | 5.4   |
| COX2(h)                                                   | 10 | 20.3  | -1.4  | 9.5   |
| PDE3A (h)                                                 | 10 | -20.5 | -33.8 | -27.2 |
| PDE4D2 (h)                                                | 10 | -12.4 | -20.9 | -16.6 |
| Lck kinase (h)                                            | 10 | -9.2  | -1.4  | -5.3  |
| acetylcholinesterase (h)                                  | 10 | 4.4   | 5.4   | 4.9   |

**Supplementary Table 5 – PK parameters of LEI-515 in mice after p.o. and i.v. administration.** CL = clearance.  $V_{ss}$  = volume of distribution at steady state.  $t_{1/2}$  = half-life.  $C_{max}$  = maximum plasma drug concentration.  $t_{max}$  = time to reach  $C_{max}$ . AUC = area under plasma concentration time curve.  $F_{po}$  = bioavailability.

|                        | p.o. | i.v. |
|------------------------|------|------|
| Dose (mg/kg)           | 10   | 10   |
| CL (ml/min/kg)         | -    | 35   |
| $V_{ss}$ (L/kg)        | -    | 2.1  |
| $t_{1/2}$ (h)          | -    | 4.5  |
| $C_{max}$ (nM)         | 2433 | -    |
| $t_{max}$ (h)          | 0.5  |      |
| AUC (h*nmol/L)         | 7330 | -    |
| $F_{po}$ (%)           | 81   |      |
| $C_{brain}/C_{plasma}$ | 0.01 |      |

**Supplementary Table 6 – LC-MS Standards and deuterium labeled internal standards for lipidomics analysis.** Q1 and Q3 are optimized precursor ion and product ion respectively and expressed as m/z. DP and CE are declustering potential (volt) and collision energy (Volt) respectively.

| Abbreviation               | Name                                      | Q1     | Q3    | DP, CE | Polarity |
|----------------------------|-------------------------------------------|--------|-------|--------|----------|
| <b>1 &amp; 2-AG (20:4)</b> | 1-Arachidonoyl Glycerol                   | 379.21 | 287.2 | 45, 10 | +        |
| <b>1-LG (18:2)</b>         | 1-Linoleoyl Glycerol                      | 355.34 | 246   | 48, 10 |          |
| <b>2-LG (18:2)</b>         | 2-Linoleoyl Glycerol                      | 357.34 | 247.5 | 48, 10 |          |
| <b>2-OG (18:1)</b>         | 2-Oleoyl Glycerol                         | 357.34 | 247.5 | 40, 12 |          |
| <b>1-OG (18:1)</b>         | 1-Oleoyl Glycerol                         | 357.34 | 247.5 | 40, 12 |          |
| <b>AEA (20:4)</b>          | Arachidonoyl Ethanolamide                 | 348.40 | 62.02 | 35, 16 |          |
| <b>DEA (22:4)</b>          | Docosatetraenoyl Ethanolamide             | 376.38 | 61.92 | 55, 18 |          |
| <b>DGLEA (18:3)</b>        | Dihomo- $\gamma$ -Linolenoyl Ethanolamide | 350.38 | 61.98 | 40, 14 |          |
| <b>DHEA (22:6)</b>         | Docosahexaenoyl Ethanolamide              | 372.38 | 62.01 | 50, 14 |          |

|                                                |                                         |        |        |          |   |
|------------------------------------------------|-----------------------------------------|--------|--------|----------|---|
| <b>EPEA (20:5)</b>                             | Eicosapentaenoyl Ethanolamide           | 346.34 | 61.98  | 36, 16   | - |
| <b>LEA (18:2)</b>                              | Linoleoyl Ethanolamide                  | 324.34 | 61.98  | 35, 14   |   |
| <b>OEA (18:1)</b>                              | Oleoyl Ethanolamide                     | 326.4  | 62.01  | 45, 16   |   |
| <b>PDEA (15:0)</b>                             | Pentadecanoyl Ethanolamide              | 286.34 | 62.01  | 45, 12   |   |
| <b>PEA (16:0)</b>                              | Palmitoyl Ethanolamide                  | 300.34 | 61.98  | 42, 14   |   |
| <b>POEA (16:1)</b>                             | Palmitoleoyl Ethanolamide               | 298.34 | 62.01  | 45, 14   |   |
| <b>SEA (18:0)</b>                              | Stearoyl Ethanolamide                   | 328.38 | 61.98  | 45, 16   |   |
| <b>AA (20:4)</b>                               | Arachidonic Acid                        | 302.28 | 259.3  | -40, -12 |   |
| <b>PA (FA 16:0)</b>                            | Palmitic Acid                           | 255.33 | 237.24 | -50, -20 |   |
| <b>SA (FA 18:0)</b>                            | Stearic Acid                            | 283.34 | 265.31 | -60, -22 |   |
| <b>OA (FA 18:1)</b>                            | Oleic Acid                              | 281.34 | 263.31 | -50, -20 |   |
| <b>LA (FA 18:2)</b>                            | Linoleic Acid                           | 279.34 | 261.25 | -64, -16 |   |
| <b>GLA (FA 18:3)</b>                           | $\gamma$ -Linolenic Acid                | 277.3  | 58     | -60, -20 |   |
| <b>ETA (FA 20:3. (<math>\omega</math>-3))</b>  | 11(Z).14(Z).17(Z)-Eicosatrienoic Acid   | 305.28 | 306.09 | -60, -18 |   |
| <b>DGLA (FA 20:3. (<math>\omega</math>-6))</b> | Dihomo- $\gamma$ -Linolenic Acid (20:3) | 305.28 | 306.03 | -66, -18 | + |
| <b>EPA (FA 20:5. (<math>\omega</math>-3))</b>  | Eicosapentaenoic Acid                   | 301.34 | 257.3  | -60, -10 |   |
| <b>DHA (FA 22:6. (<math>\omega</math>-3))</b>  | Docosahexaenoic Acid                    | 327.28 | 283.31 | -60, -10 |   |
| <b>2-AG-d8 (20:4)</b>                          | 2-Arachidonoyl Glycerol-d8              | 387.38 | 294.2  | 45, 10   |   |
| <b>AEA-d8 (20:4)</b>                           | Arachidonoyl Ethanolamide-d8            | 356.38 | 62.79  | 35, 16   |   |
| <b>DHEA-d4 (22:6)</b>                          | Docosahexaenoyl Ethanolamide-d4         | 376.38 | 66.01  | 50, 14   |   |
| <b>LEA-d4 (18:2)</b>                           | Linoleoyl Ethanolamide-d4               | 328.34 | 66.01  | 35, 16   |   |
| <b>OEA-d4 (18:1)</b>                           | Oleoyl Ethanolamide-d4                  | 330.38 | 66.01  | 45, 16   |   |
| <b>PEA-d5 (16:0)</b>                           | Palmitoyl Ethanolamide-d5               | 305.34 | 61.98  | 42, 16   |   |
| <b>SEA-d3 (18:0)</b>                           | Stearoyl Ethanolamide-d3                | 331.38 | 61.91  | 45, 16   |   |
| <b>EPEA-d4 (20:5)</b>                          | Eicosapentaenoyl Ethanolamide-d4        | 350.34 | 66.08  | 36, 18   |   |
| <b>AA-d8 (20:4)</b>                            | Arachidonic Acid-d8                     | 311.34 | 267.30 | -40, -12 | - |
| <b>PA (16:0)-d31</b>                           | Palmitic Acid-d31                       | 286.5  | 266.37 | -40, -22 |   |

61

62

63

64  
65**Supplementary Table 7 – LC-MS Standards and deuterium labeled internal standards for *in vivo* lipidomics analysis.**

| Analyte                         | MS-Mode | Mass transition | Cone voltage (V) | Collision energy (eV) |
|---------------------------------|---------|-----------------|------------------|-----------------------|
| Arachidonic acid (AA) C20:4     | ES-     | 303.14 > 259.16 | 20               | 16                    |
| Arachidonic acid (AA) C20:4-d8  | ES-     | 311.19 > 267.10 | 10               | 15                    |
| 2-Arachidonylglycerol (2-AG)    | ES+     | 379.24 > 287.21 | 40               | 14                    |
| 2-Arachidonylglycerol (2-AG-d5) | ES+     | 384.24 > 287.21 | 40               | 14                    |

66  
67**Supplementary Table 8 – Summary of Three-way ANOVA results**

| Figure    | Source of Variation                                                                                                                                                                                                                                                                                                                                                                                                                                                                                                                                                                                                                                                                                                                                                                                                                                                                          |
|-----------|----------------------------------------------------------------------------------------------------------------------------------------------------------------------------------------------------------------------------------------------------------------------------------------------------------------------------------------------------------------------------------------------------------------------------------------------------------------------------------------------------------------------------------------------------------------------------------------------------------------------------------------------------------------------------------------------------------------------------------------------------------------------------------------------------------------------------------------------------------------------------------------------|
| <b>6b</b> | Three-way ANOVA revealed significant main effects of drug treatment ( $p < 0.0001$ ) and time ( $p < 0.0001$ ) and the interaction between treatment and time was significant ( $p < 0.0001$ ). No main effect of sex ( $p = 0.1814$ ) or interaction with sex (Time x Sex: $p = 0.3212$ ; Sex x Treatment: $p = 0.873$ ; Time x Sex x Treatment: $p = 0.7577$ ) was detected. See also Fig. S7a.                                                                                                                                                                                                                                                                                                                                                                                                                                                                                            |
| <b>6c</b> | Three-way ANOVA revealed main effects of drug treatment ( $p < 0.0001$ ) and time ( $p = 0.0357$ ) but no main effect of sex ( $p = 0.3512$ ) or interaction with sex or time (Sex x Treatment: $p = 0.1288$ ; Time x Sex: $p = 0.4493$ ; Time x Treatment: $p = 0.0743$ ; Time x Sex x Treatment: $p = 0.6927$ ) was detected throughout the period of chronic (p.o.) dosing. Efficacy was preserved at least 4 days following termination of oral dosing; three-way ANOVA revealed main effects of drug treatment ( $p < 0.0001$ ), time ( $p = 0.0037$ ) and their interaction ( $p = 0.0007$ ) but no main effect of sex (Sex: $p = 0.4215$ ) or interaction with sex (Sex x Treatment: $p = 0.6342$ ; Time x Sex: $p = 0.6380$ ; Time x Sex x Treatment: $p = 0.9346$ ) was detected across the 10-day observation interval following termination of chronic dosing. See also Fig. S7c. |
| <b>6e</b> | Three-way ANOVA revealed significant main effects of drug treatment ( $p < 0.0001$ ) and time ( $p < 0.0001$ ) and their interaction ( $p < 0.0001$ ; see also Fig. S7a) but no main effect of sex ( $p = 0.1269$ ) or interaction with sex (Sex x Treatment: $p = 0.1547$ ; Time x Sex: $p = 0.6117$ ; Time x Sex x Treatment: $p = 0.5945$ ) was detected. **** $p < 0.0001$ LEI-515 vs. vehicle control groups. See also Fig. S7b.                                                                                                                                                                                                                                                                                                                                                                                                                                                        |
| <b>6f</b> | Three-way ANOVA revealed a main effect of drug treatment ( $p < 0.0001$ ) and an interaction between drug treatment, time and sex ( $p = 0.049$ ), but no other main effects (Time: $p = 0.6512$ ; Sex: $p = 0.206$ ) or interactions (Time x Sex: $p = 0.2165$ ; Time x Treatment: $p = 0.8939$ ; Sex x Treatment: $p = 0.3299$ ) were detected throughout the period of chronic (i.p.) dosing. Efficacy was preserved at least 4 days following termination of i.p. dosing; Three-way ANOVA revealed significant main effect of drug treatment ( $p < 0.0001$ ) and time ( $p < 0.0001$ ) and the interaction between drug treatment and time was significant ( $p < 0.0001$ ) but no main effect of sex ( $p = 0.5045$ ), or interaction with sex (Sex x Time: $p = 0.1657$ ; Sex x Treatment: $p = 0.4588$ ; Time x Sex x Treatment: $p = 0.5596$ ) was detected. See also Fig. S7d.     |

68  
69**Supplementary Table 9: Summary of P values obtained from Two-way ANOVA justifying pooling of sexes in Supplementary Figure S7.**

| Figure                              | Groups                      | Time         | Treatment    | Interaction  |
|-------------------------------------|-----------------------------|--------------|--------------|--------------|
| <b>6B</b><br><b>(p.o.)</b>          | VEH (M) vs. VEH (F)         | 0.635        | 0.2021       | 0.1676       |
| <b>6B</b><br><b>(p.o.)</b>          | LEI-515 (M) vs. LEI-515 (F) | $p < 0.0001$ | 0.4809       | 0.7937       |
| <b>6B</b><br><b>(p.o.)</b>          | VEH (M+F) vs. LEI-515 (M+F) | $p < 0.0001$ | $p < 0.0001$ | $p < 0.0001$ |
| <b>6C Day 1-10</b><br><b>(p.o.)</b> | VEH (M) vs. VEH (F)         | 0.5209       | 0.6045       | 0.9604       |

|                                                                                     |                             |          |          |          |
|-------------------------------------------------------------------------------------|-----------------------------|----------|----------|----------|
| <b>6C Day 1-10</b><br><b>(p.o.)</b>                                                 | LEI-515 (M) vs. LEI-515 (F) | 0.0404   | 0.1516   | 0.4607   |
| <b>6C Day 1-10</b><br><b>(p.o.)</b>                                                 | VEH (M+F) vs. LEI-515 (M+F) | 0.0371   | P<0.0001 | 0.0803   |
| <b>6C Day 11-20</b><br><b>(p.o.)</b>                                                | VEH (M) vs. VEH (F)         | 0.9385   | 0.2896   | 0.8983   |
| <b>6C Day 11-20</b><br><b>(p.o.)</b>                                                | LEI-515 (M) vs. LEI-515 (F) | 0.0003   | 0.8415   | 0.6916   |
| <b>6C Day 11-20</b><br><b>(p.o.)</b>                                                | VEH (M+F) vs. LEI-515 (M+F) | 0.0024   | p<0.0001 | 0.0004   |
| <b>6E</b><br><b>(i.p.)</b>                                                          | VEH (M) vs. VEH (F)         | 0.6683   | 0.9325   | 0.972    |
| <b>6E</b><br><b>(i.p.)</b>                                                          | LEI-515 (M) vs. LEI-515 (F) | p<0.0001 | 0.0647   | 0.4224   |
| <b>6E</b><br><b>(i.p.)</b>                                                          | VEH (M+F) vs. LEI-515 (M+F) | p<0.0001 | p<0.0001 | p<0.0001 |
| <b>6F Day 1-10</b><br><b>(i.p.)</b>                                                 | VEH (M) vs. VEH (F)         | 0.8236   | 0.7543   | 0.1814   |
| <b>6F Day 1-10</b><br><b>(i.p.)</b>                                                 | LEI-515 (M) vs. LEI-515 (F) | 0.6749   | 0.2036   | 0.0706   |
| <b>6F Day 1-10</b><br><b>(i.p.)</b>                                                 | VEH (M+F) vs. LEI-515 (M+F) | 0.7086   | p<0.0001 | 0.8744   |
| <b>6F Day 11-20</b><br><b>(i.p.)</b>                                                | VEH (M) vs. VEH (F)         | 0.3435   | 0.9494   | 0.5984   |
| <b>6F Day 11-20</b><br><b>(i.p.)</b>                                                | LEI-515 (M) vs. LEI-515 (F) | p<0.0001 | 0.3865   | 0.1964   |
| <b>6F Day 11-20</b><br><b>(i.p.)</b>                                                | VEH (M+F) vs. LEI-515 (M+F) | p<0.0001 | p<0.0001 | p<0.0001 |
| <b>Abbreviations: M, male; F, female; p.o., oral; i.p., intraperitoneal</b>         |                             |          |          |          |
| <b>Source data and all statistical analyses are provided as a Source data file.</b> |                             |          |          |          |

**Figure S1**

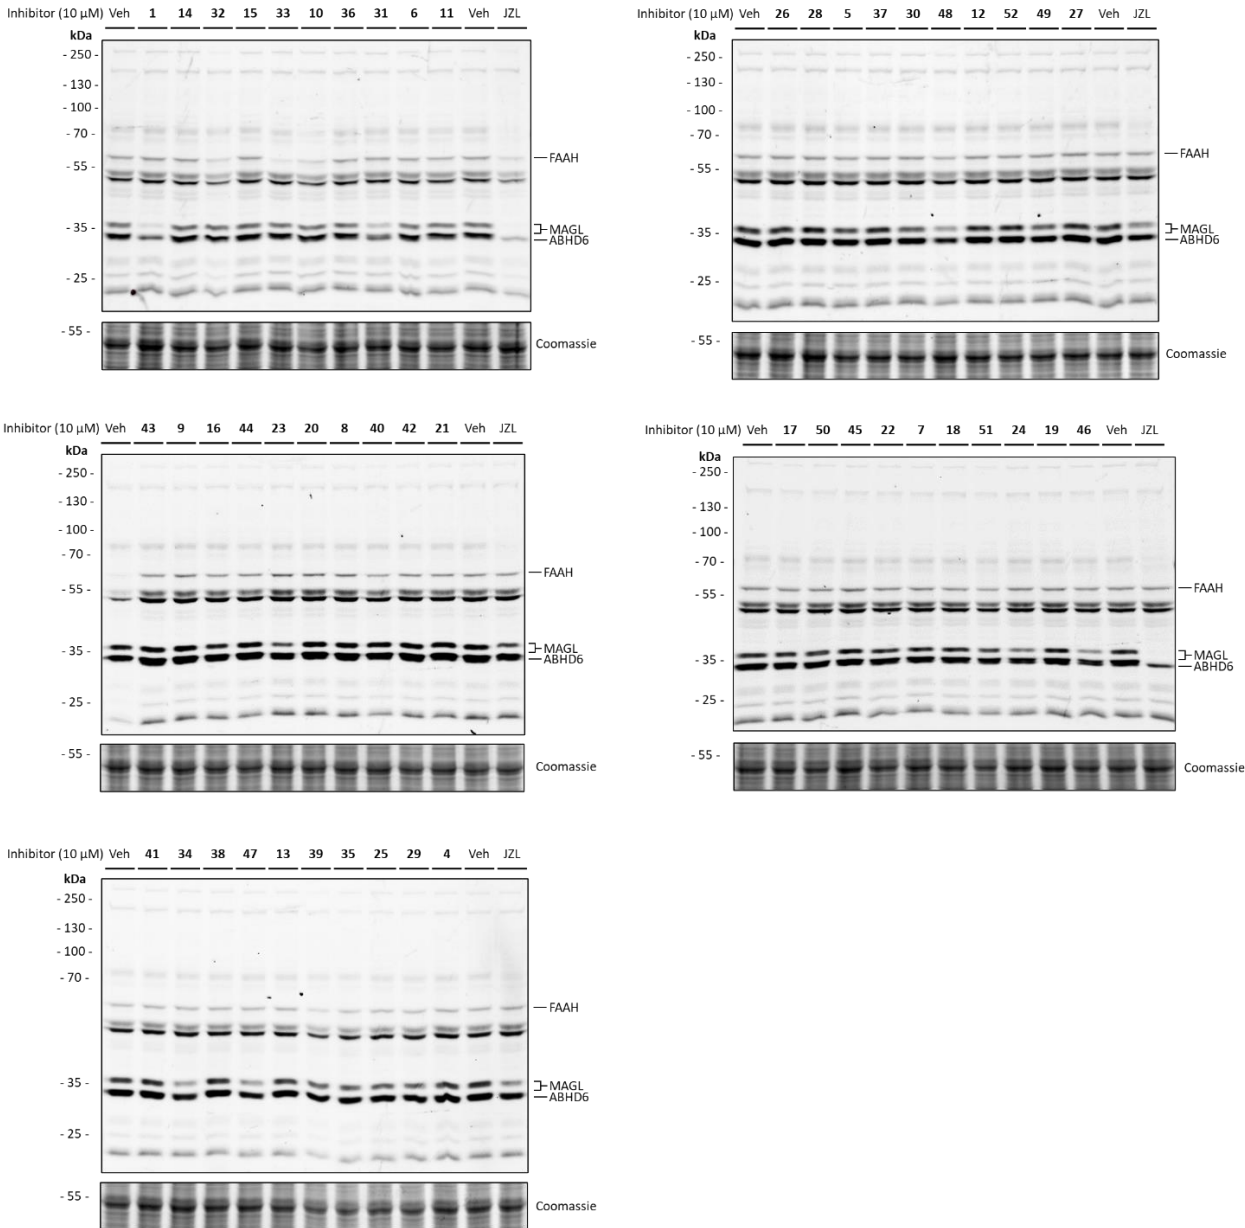

**Supplementary Figure 1 – Orthogonal competitive ABPP assay for hit validation and selectivity assessment.** ABPP was performed on mouse brain membrane proteome using FP-TAMRA. Proteome was pre-incubated with inhibitor (10  $\mu$ M, 30 min), followed by incubation with FP-TAMRA (100 nM, 10 min). JZL184 was included as positive control on all gels. The data shown is n=1 due to limited amount of sample of the hits of which some was used for LC-MS analysis confirming the compound identity.

86 **Figure S2**

87

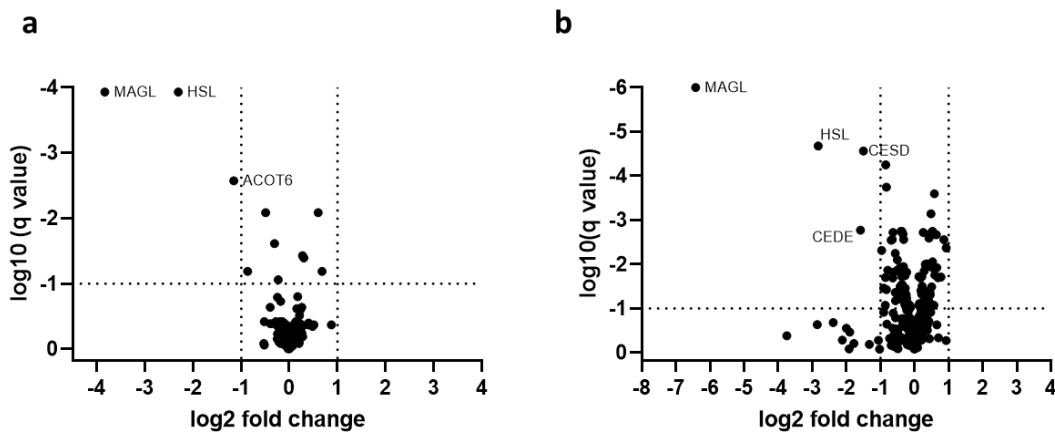

88

89

90

91

92

93

94

95

96

97

98

99

100

101

102

103

104

105

106

107

108

109

110

111

112

113

114

115

116

117

118

119

120

121

122

123

124

125

126

127

128

129

130

131

132

133

134

135

136

137

138

139

140

141

142

143

144

145

146

147

148

149

150

151

152

153

154

155

156

157

158

159

160

161

162

163

164

165

166

167

168

169

170

171

172

173

174

175

176

177

178

179

180

181

182

183

184

185

186

187

188

189

190

191

192

193

194

195

196

197

198

199

200

201

202

203

204

205

206

207

208

209

210

211

212

213

214

215

216

217

218

219

220

221

222

223

224

225

226

227

228

229

230

231

232

233

234

235

236

237

238

239

240

241

242

243

244

245

246

247

248

249

250

251

252

253

254

255

256

257

258

259

260

261

262

263

264

265

266

267

268

269

270

271

272

273

274

275

276

277

278

279

280

281

282

283

284

285

286

287

288

289

290

291

292

293

294

295

296

297

298

299

300

301

302

303

304

305

306

307

308

309

310

311

312

313

314

315

316

317

318

319

320

321

322

323

324

325

326

327

328

329

330

331

332

333

334

335

336

337

338

339

340

341

342

343

344

345

346

347

348

349

350

351

352

353

354

355

356

357

358

359

360

361

362

363

364

365

366

367

368

369

370

371

372

373

374

375

376

377

378

379

380

381

382

383

384

385

386

387

388

389

390

391

392

393

394

395

396

397

398

399

400

401



107 **Figure S4**

108

109 **Supplementary Figure 4 – Profiling of MAGL activity and protein level in a panel of 13 breast cancer cell lines.**  
110 ABPP was performed on cell lysates (2mg/mL) using LEI-463-Cy5 (100 nM, 15 min). Actin was used as a loading  
111 control. MAGL antibody: ab24701 (1:200 dilution). n=3.

112

113 **Figure S5**

114

115 **Supplementary Figure 5 – *In vivo* 2-AG levels in lung and liver after LEI-515 treatment.** (a) 2-AG levels in  
116 C57BL/6J mice lung and liver (100 mg/kg p = 0.0158) after oral administration (30 or 100 mg/kg) of LEI-515. (n  
117 = 4 for vehicle and n = 6 for LEI-515). High variability in 2-AG levels was observed in these tissues. Therefore, 2-  
118 AG levels in (b) lung ( $R^2 = 0.73$ ,  $p < 0.001$ ) and (c) liver ( $R^2 = 0.36$ ,  $p = 0.0084$ ) were plotted against quantified LEI-  
119 515 levels. An increase in 2-AG levels was associated with increasing LEI-515 levels. (d-e) AA and AEA levels in  
120 lung and liver tissue (n = 4 for vehicle and n = 6 for LEI-515).. Statistical analysis: One-way ANOVA and Dunnett  
121 post-hoc test (a, d and e) or linear regression (b and c). \*p<0.05 vs. vehicle control. Data are presented as mean  
122  $\pm$  SEM.

123

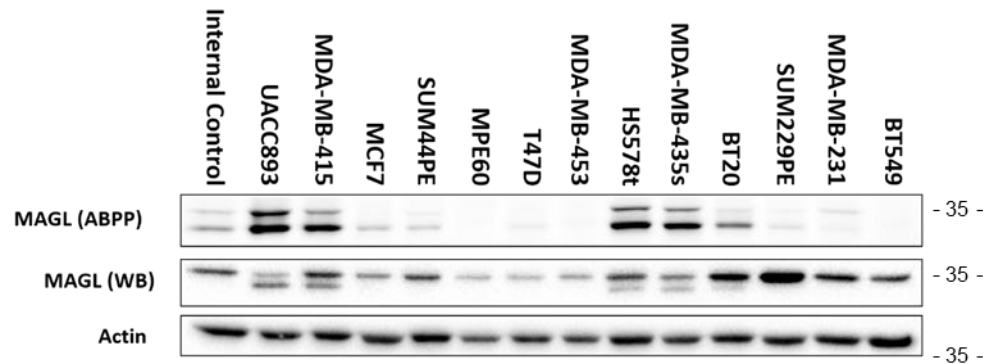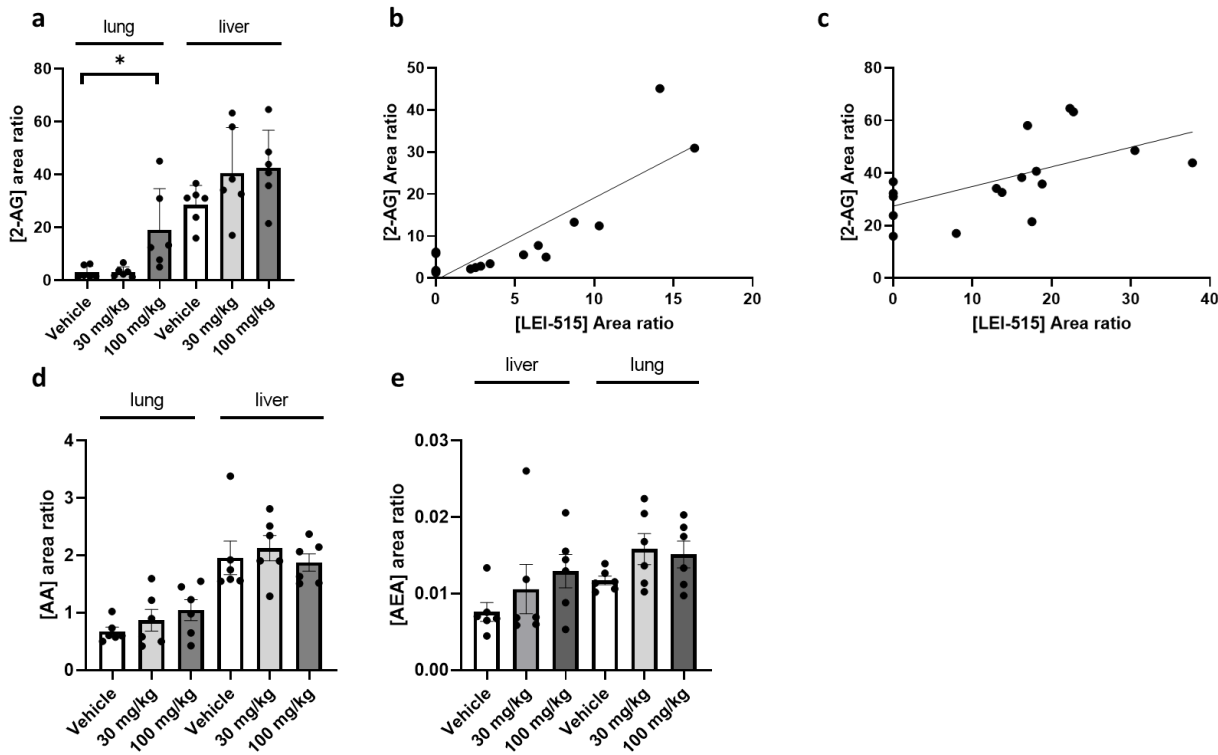

124

125

126

Figure S6

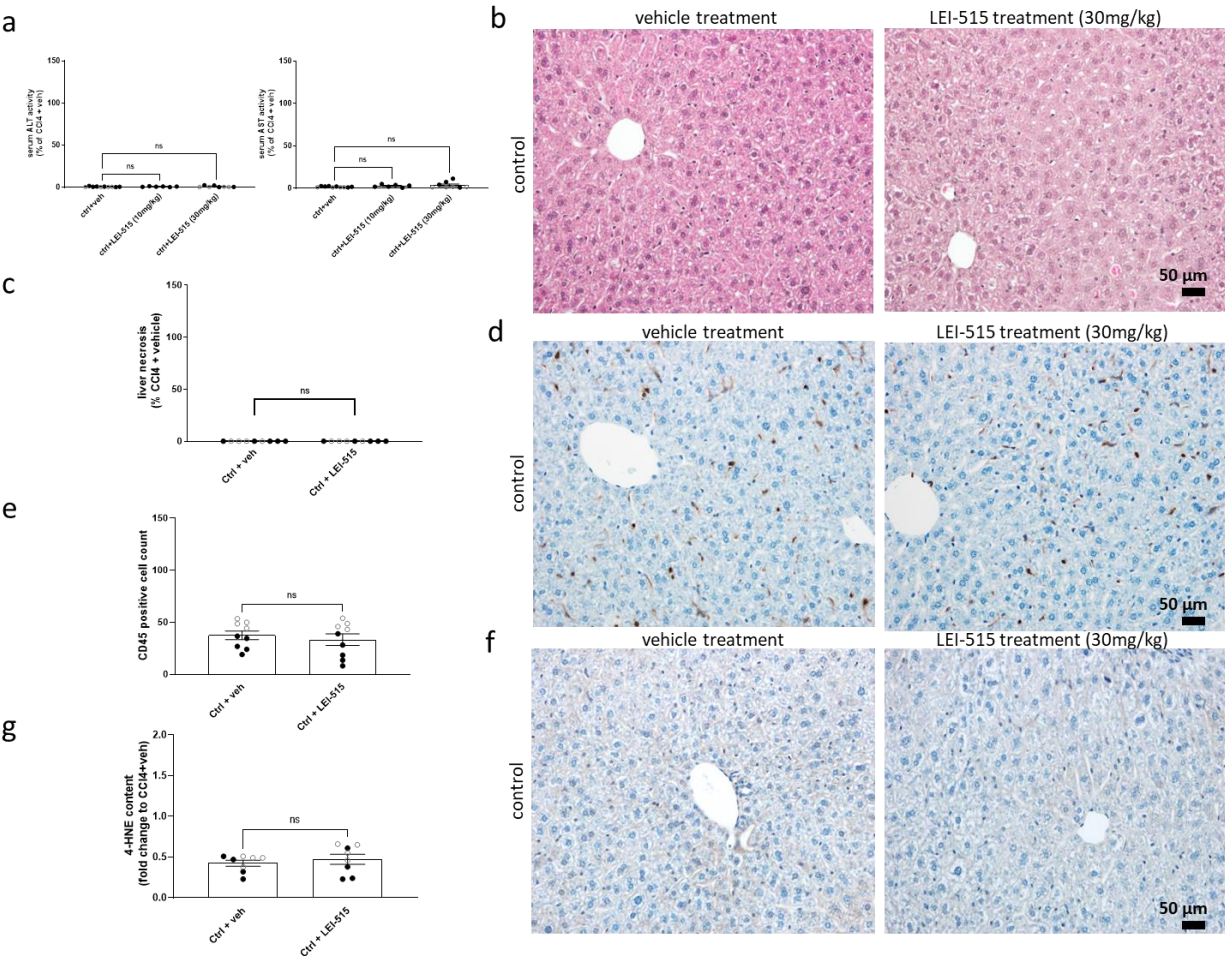

**Supplementary Figure 6 – LEI-515 has no effects on liver function in control animals.** (a) Effect of vehicle treatment (n=10) or LEI-515 (10 and 30 mg/kg i.p., n=6 or 8/group, respectively) on liver transaminases [alanine aminotransferase (ALT) and aspartate aminotransferase (AST) respectively], (b-c) histopathological liver necrosis in control groups and its quantification (n=9/group), (d-e) CD45+ leukocyte infiltration in control groups and its quantification (n=9/group), (f-g) lipid peroxidation (4-HNE) in control groups and its quantification (n = 8/group). Data are presented as mean  $\pm$  SEM. Open symbols represent female, whereas closed symbols show male subjects. Statistical analysis: One-way ANOVA and Dunnett post-hoc test (a) or unpaired two-tailed t-test (c; e; g).

127

128

129

130

131

132

133

134

135

136

137  
138  
139

Figure S7

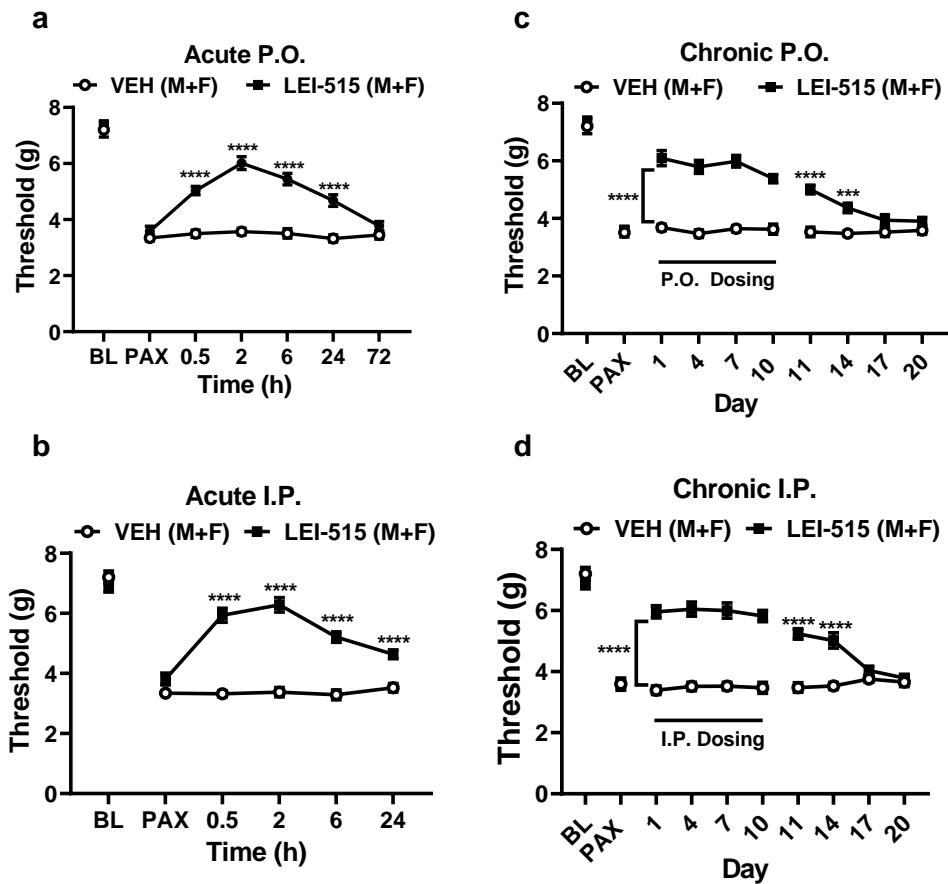

140  
141  
142  
143  
144  
145  
146  
147  
148  
149  
150  
151  
152  
153  
154  
155  
156  
157  
158  
159  
160  
161  
162

**Supplementary Figure 7 – The peripherally restricted MAGL inhibitor LEI-515, administered p.o. or i.p., suppresses paclitaxel-induced mechanical hypersensitivity in mixed sex groups.** Acute LEI-515 (10 mg/kg) suppressed paclitaxel-induced mechanical sensitivity following (a) oral or (b) i.p. administration. Efficacy was observed from 0.5-24 h for each route of administration. (a-b) ANOVA revealed main effects of treatment ( $p<0.0001$ ) and time ( $p<0.0001$ ) and the interaction ( $p<0.0001$ ) was significant. \*\*\*\* $p<0.0001$  vs. vehicle (Two-way ANOVA, Sidak's multiple comparison test). (c) Once daily dosing with LEI-515 (10 mg/kg/day p.o. for 10 days) suppressed paclitaxel-induced mechanical hypersensitivity without loss of efficacy during the period of oral drug delivery; Two-way ANOVA revealed a main effect of treatment ( $p<0.0001$ ) and time ( $p=0.0371$ ) and the interaction ( $p=0.0803$ ) was not significant. Efficacy was preserved at least 4 days following termination of p.o. dosing; Two-way ANOVA revealed a main effect of drug treatment ( $p<0.0001$ ), time ( $p=0.0024$ ) and the interaction ( $p=0.0004$ ) was significant across the ten-day observation interval following termination of drug delivery. (d) Once daily dosing with LEI-515 (10 mg/kg/day i.p. for 10 days) suppressed paclitaxel-induced mechanical hypersensitivity without loss of efficacy during the period of drug delivery. Two-way ANOVA revealed a main effect of drug treatment ( $p<0.0001$ ), but no main effect of time ( $p=0.7086$ ) or interaction ( $p=0.8744$ ) was detected across the period of i.p. drug delivery. Efficacy was preserved at least 4 days following termination of i.p. dosing; Two-way ANOVA revealed a main effect of treatment ( $p<0.0001$ ) and time ( $p<0.0001$ ) and the interaction ( $p<0.0001$ ) was significant. (a-d) \*\*\*\* $p<0.0001$ , \*\*\* $p<0.001$  vs. vehicle control. See Supplementary Table 9 for statistical results comparing sexes that were pooled for each treatment. (a, c)  $n=16$  mixed sex vehicle ( $n=8$  per sex),  $n=15$  mixed sex LEI-515 ( $n=7-8$  per sex). (b, d)  $n=15$  mixed sex vehicle ( $n=7-8$  per sex),  $n=16$  mixed sex LEI-515 ( $n=8$  per sex). (a-d) All data are presented as mean  $\pm$  SEM. Statistical analysis: Two-way ANOVA with Tukey and Sidak Multiple Comparison tests. Source data are provided as Source data file.

## Synthetic procedures

### General remarks

All reactions were performed using oven or flame-dried glassware and dry solvents. Reagents were purchased from Sigma Aldrich, Acros and Merck and used without further purification unless noted otherwise. All moisture sensitive reactions were performed under an argon or nitrogen atmosphere. Traces of water were removed from starting compounds by co-evaporation with toluene. Reactions were followed by thin layer chromatography and was performed using TLC Silica gel 60 F<sub>245</sub> on aluminum sheets. Compounds were visualized using a KMnO<sub>4</sub> stain (K<sub>2</sub>CO<sub>3</sub> (40 g), KMnO<sub>4</sub> (6 g), H<sub>2</sub>O (600 mL) and 10% NaOH (5 mL)). <sup>1</sup>H- and <sup>13</sup>C-NMR spectra were recorded on a Bruker AV-400, 500, 600 or 850 using CDCl<sub>3</sub> or CD<sub>3</sub>OD as solvent, unless stated otherwise. Chemical shift values are reported in ppm with tetramethylsilane or solvent resonance as the internal standard (CDCl<sub>3</sub>: δ 7.26 for <sup>1</sup>H, δ 77.16 for <sup>13</sup>C, CD<sub>3</sub>OD: δ 3.31 for <sup>1</sup>H, δ 49.00 for <sup>13</sup>C). Data are reported as follows: chemical shifts (δ), multiplicity (s = singlet, d = doublet, dd = double doublet, td = triple doublet, t = triplet, q = quartet, quint = quint, br = broad, m = multiplet), coupling constants *J* (Hz), and integration. LC-MS measurements were performed on a Thermo Finnigan LCQ Advantage Max ion-trap mass spectrometer (ESI+) coupled to a Surveyor HPLC system (Thermo Finnigan) equipped with a standard C18 (Gemini, 4.6 mmD × 50 mmL, 5 μm particle size, Phenomenex) analytical column and buffers A: H<sub>2</sub>O, B: ACN, C: 0.1% aq. TFA. Preparative HPLC purification was performed on a Waters Acquity Ultra Performance LC with a C18 column (Gemini, 150 × 21.2 mm, Phenomenex). Diode detection was done between 210 and 600 nm. Gradient: ACN in (H<sub>2</sub>O + 0.2% TFA). High-resolution mass spectra (HRMS) were recorded on a Thermo Scientific LTQ Orbitrap XL.

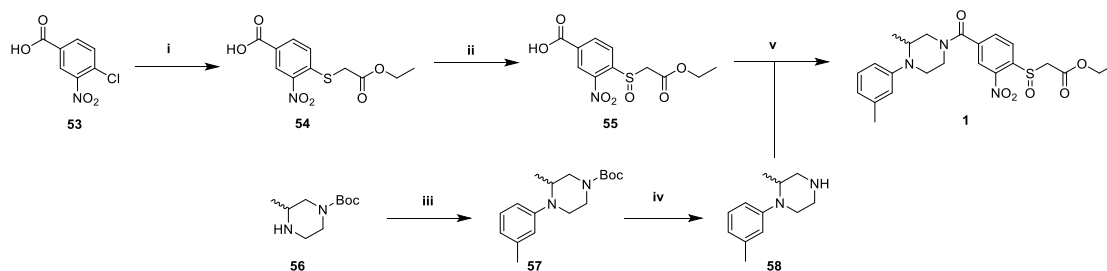

**Scheme 1.** Synthesis route for hit 1. Reagents and conditions: i) ethyl 2-mercaptoacetate, pyridine, 115 °C. ii) Oxone, MeOH / H<sub>2</sub>O. iii) sodium *tert*-butoxide, BINAP, Pd(OAc)<sub>2</sub>, 1,4-dioxane, 85 °C. iv) TFA, DCM. v) HATU, DiPEA, DCM.

**4-((2-Ethoxy-2-oxoethyl)thio)-3-nitrobenzoic acid (54)**

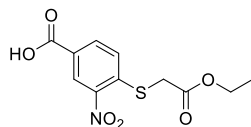

To a solution of 4-chloro-3-nitrobenzoic acid (1.26 mg, 6.24 mmol, 1.50 eq.) in pyridine (5 mL) was added ethyl mercaptoacetate (0.5 g, 4.16 mmol, 1.00 eq.) and the mixture was heated to 115 °C overnight in an oil bath. The reaction progress was monitored by TLC analysis. Upon full conversion of the starting materials, the mixture was allowed to cool to rt and the pH was adjusted to 1 with 1M HCl solution. The precipitate was filtered and the solid were washed with water to provide the product (1.01 g, 3.54 mmol, 85%). <sup>1</sup>H NMR (400 MHz, Methanol-*d*<sub>4</sub>) δ 8.73 (d, *J* = 1.9 Hz, 1H), 8.16 (dd, *J* = 8.5, 1.9 Hz, 1H), 7.66 (d, *J* = 8.5 Hz, 1H), 4.20 (q, *J* = 7.1 Hz, 2H), 4.00 (s, 2H), 1.25 (t, *J* = 7.1 Hz, 3H). <sup>13</sup>C NMR (101 MHz, Methanol-*d*<sub>4</sub>) δ 170.38, 167.34, 143.24, 135.02, 129.44, 128.46, 128.08, 63.20, 35.65, 14.53.

**4-((2-Ethoxy-2-oxoethyl)sulfinyl)-3-nitrobenzoic acid (55)**

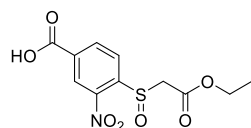

To a cooled solution of 4-((2-ethoxy-2-oxoethyl)thio)-3-nitrobenzoic acid (285 mg, 1.00 mmol, 1.00 eq.) in methanol (13 mL) was dropwise added a solution of Oxone (62 mg, 1.00 mmol, 1.00 eq.) in water (4 mL) and the reaction mixture was stirred at rt for 2.5 h. The reaction progress was monitored by TLC analysis. Upon full conversion of the starting materials, the mixture was diluted with water and extracted with DCM. The combined organic layers were washed with brine, dried (MgSO<sub>4</sub>), filtered and concentrated under reduced pressure. The residue was purified by silica gel column chromatography (MeOH/DCM, 1% to 2%) to afford the product (210 mg, 0.70 mmol, 70%). <sup>1</sup>H NMR (400 MHz, Methanol-*d*<sub>4</sub>) δ 8.88 (d, *J* = 1.6 Hz, 1H), 8.61 (dd, *J* = 8.2, 1.6 Hz, 1H), 8.34 (d, *J* = 8.2 Hz, 1H), 4.36 (d, *J* = 14.4 Hz, 1H), 4.29 – 4.13 (m, 2H), 3.82 (d, *J* = 14.5 Hz, 1H), 1.26 (t, *J* = 7.1 Hz, 3H). <sup>13</sup>C NMR (101 MHz, Methanol-*d*<sub>4</sub>) δ 166.82, 166.60, 147.30, 136.89, 136.55, 128.43, 127.26, 63.37, 61.32, 14.54.

***tert*-Butyl (*R*)-3-methyl-4-(*m*-tolyl)piperazine-1-carboxylate ((*R*)-57)**

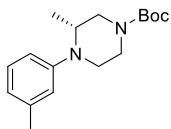

A mixture of 1-bromo-3-methylbenzene (1 g, 5.85 mmol, 1 eq.), *tert*-butyl (*R*)-3-methylpiperazine-1-carboxylate (1.17 g, 5.85 mmol, 1 eq.), Cs<sub>2</sub>CO<sub>3</sub> (2.86 g, 8.77 mmol, 1.5 eq.), *rac*-BINAP (233 mg, 0.35 mmol, 0.06 eq.) and palladium diacetate (52.53 mg, 0.23 mmol, 0.04 eq.) in degassed 1,4-dioxane was heated to 85 °C under nitrogen atmosphere overnight. The reaction progress was monitored by TLC analysis. Upon full conversion of the starting materials, the mixture was diluted with DCM, washed with water, dried (MgSO<sub>4</sub>), filtered and concentrated under reduced pressure. The residue was purified by silica gel column chromatography (pentane/diethyl ether, 10/1) to give the product (1.05 g, 3.62 mmol, 62%).

***tert*-Butyl (*S*)-3-methyl-4-(*m*-tolyl)piperazine-1-carboxylate ((*S*)-57)**

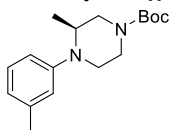

A mixture of 1-bromo-3-methylbenzene (100 mg, 0.59 mmol, 1 eq.), *tert*-butyl (*S*)-3-methylpiperazine-1-carboxylate (176 mg, 0.88 mmol, 1.5 eq.), Cs<sub>2</sub>CO<sub>3</sub> (286 mg, 0.88 mmol, 1.5 eq.), *rac*-BINAP (23.25 mg, 0.04 mmol, 0.06 eq.) and palladium diacetate (5.25 mg, 0.02 mmol, 0.04 eq.) in degassed 1,4-dioxane was heated to 85 °C under nitrogen atmosphere overnight. The reaction progress was monitored by TLC analysis. Upon full conversion of the starting materials, the mixture was diluted with DCM, washed with water, dried (MgSO<sub>4</sub>), filtered and concentrated under reduced pressure. The residue was purified by silica gel column chromatography (pentane/diethyl ether, 10/1) to give the product (130 mg, 0.45 mmol, 77%). <sup>1</sup>H NMR (400 MHz, CDCl<sub>3</sub>) δ 7.14 (t, *J* = 7.7 Hz, 1H), 6.71 – 6.67 (m, 3H), 4.04 – 3.66 (m, 3H), 3.44 – 2.99 (m, 4H), 2.30 (s, 3H), 1.48 (s, 9H), 0.98 (d, *J* = 6.5 Hz, 3H). <sup>13</sup>C NMR (101 MHz, CDCl<sub>3</sub>) δ 155.13, 150.22, 138.86, 129.07, 120.93, 118.05, 114.33, 79.70, 51.65, 49.45, 48.25, 44.30, 28.50, 21.85, 12.25.

**(R)-2-methyl-1-(*m*-tolyl)piperazine ((R)-58)**

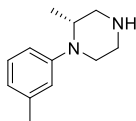

To a solution of **(R)-57** (0.75 g, 2.58 mmol, 1.00 eq.) in DCM (8 mL) was added 2 mL TFA and the mixture was stirred for 2 h at room temperature. The reaction progress was monitored by TLC analysis. Upon full conversion of the starting materials, the reaction mixture was diluted with DCM (20 mL), washed with saturated NaHCO<sub>3</sub> solution, dried (MgSO<sub>4</sub>), filtered and concentrated under reduced pressure. The residue was purified by silica gel column chromatography (DCM/MeOH,10/1) to give the product (405 mg, 2.13 mmol, 82%). <sup>1</sup>H NMR (400 MHz, CDCl<sub>3</sub>) δ 7.20 – 7.08 (m, 1H), 6.80 – 6.68 (m, 3H), 3.72 (m, 1H), 3.67 – 3.50 (br, 1H), 3.19 – 2.82 (m, 6H), 2.31 (s, 3H), 1.03 (d, *J* = 6.5 Hz, 3H). <sup>13</sup>C NMR (101 MHz, CDCl<sub>3</sub>) δ 150.56, 138.84, 128.98, 121.47, 119.16, 115.41, 51.38, 51.30, 46.09, 45.93, 21.78, 13.00.

**(S)-2-methyl-1-(*m*-tolyl)piperazine ((S)-58)**

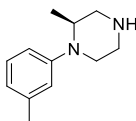

To a solution of **(S)-57** (150 mg, 0.52 mmol, 1.00 eq.) in DCM (4 mL) was added 1 mL TFA and the mixture was stirred for 2 h at room temperature. The reaction progress was monitored by TLC analysis. Upon full conversion of the starting materials, the reaction mixture was diluted with DCM (10 mL), washed with saturated NaHCO<sub>3</sub> solution, dried (MgSO<sub>4</sub>), filtered and concentrated under reduced pressure. The residue was purified by silica gel column chromatography (DCM/MeOH,10/1) to give the product (90 mg, 0.47 mmol, 92%). <sup>1</sup>H NMR (400 MHz, CDCl<sub>3</sub>) δ 7.14 (t, *J* = 7.5 Hz, 1H), 6.78 – 6.62 (m, 3H), 3.73 (qq, *J* = 6.7, 3.7, 3.3 Hz, 1H), 3.15 – 2.78 (m, 6H), 2.31 (s, 3H), 1.03 (d, *J* = 6.5 Hz, 3H). <sup>13</sup>C NMR (101 MHz, CDCl<sub>3</sub>) δ 150.78, 138.76, 128.94, 120.80, 118.44, 114.69, 51.85, 51.40, 46.46, 45.97, 21.83, 12.64.

258 **Ethyl 2-((4-((*R*)-3-methyl-4-(*m*-tolyl)piperazine-1-carbonyl)-2-nitrophenyl)sulfinyl)acetate ((*R*)-1)**

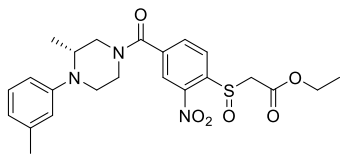

259  
260 To a mixture of (**R**)-**58** (57.4 mg, 0.30 mmol, 1 eq.), **55** (100 mg, 0.33 mmol, 1.1 eq.) in DCM (5 mL) was added  
261 HATU (140 mg, 0.45 mmol, 1.5 eq.) and DiPEA (117 mg, 0.91 mmol, 3 eq.). Then the mixture was stirred  
262 overnight. The reaction progress was monitored by TLC analysis. Upon full conversion of the starting materials,  
263 the reaction mixture was diluted with DCM (10 mL), washed with water, dried (MgSO<sub>4</sub>), filtered and concentrated  
264 under reduced pressure. The residue was purified by silica gel column chromatography (DCM/MeOH,10/1) to  
265 give the product (98 mg, 0.21 mmol, 69%). <sup>1</sup>H NMR (850 MHz, CDCl<sub>3</sub>) δ 8.47 – 8.34 (m, 2H), 8.07 – 7.97 (m, 1H),  
266 7.18 (t, *J* = 7.8 Hz, 1H), 6.83 – 6.68 (m, 3H), 4.47 – 4.08 (m, 4H), 3.78 (d, *J* = 13.8 Hz, 2H), 3.72 – 3.06 (m, 5H), 2.33  
267 (s, 3H), 1.28 (td, *J* = 7.1, 1.7 Hz, 3H), 1.12 – 0.92 (m, 3H). <sup>13</sup>C NMR (214 MHz, CDCl<sub>3</sub>) δ 166.88, 164.60, 149.51,  
268 144.89, 143.86, 139.88, 139.17, 133.69, 129.20, 127.89, 124.24, 121.93, 119.36, 115.60, 62.44, 60.04, 52.25,  
269 47.72, 45.62, 42.59, 21.79, 14.18, 12.71.

270  
271 **Ethyl 2-((4-((*S*)-3-methyl-4-(*m*-tolyl)piperazine-1-carbonyl)-2-nitrophenyl)sulfinyl)acetate ((*S*)-1)**

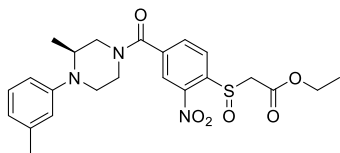

272  
273 To a mixture of (**S**)-**58** (57.4 mg, 0.30 mmol, 1 eq.), **55** (100 mg, 0.33 mmol, 1.1 eq.) in DCM (5 mL) was added  
274 HATU (140 mg, 0.45 mmol, 1.5 eq.) and DiPEA (117 mg, 0.91 mmol, 3 eq.). Then the mixture was stirred  
275 overnight. The reaction progress was monitored by TLC analysis. Upon full conversion of the starting materials,  
276 the reaction mixture was diluted with DCM (10 mL), washed with water, dried (MgSO<sub>4</sub>), filtered and concentrated  
277 under reduced pressure. The residue was purified by silica gel column chromatography (DCM/MeOH,10/1) to  
278 give the product (140 mg, 0.30 mmol, 98%).

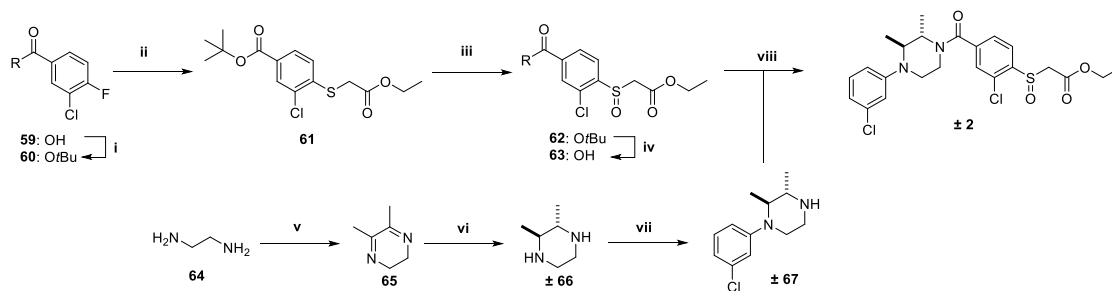

280  
281 **Scheme 2.** Synthesis route for compound **2**. Reagents and conditions: i) Boc<sub>2</sub>O, DMAP, *t*-BuOH, 65 °C. ii) Ethyl 2-



mercaptoacetate, K<sub>2</sub>CO<sub>3</sub>, ACN. iii) Oxone, MeOH / H<sub>2</sub>O. iv) TFA, DCM. v) Diacetyl, Et<sub>2</sub>O. vi) Na, EtOH, 80 °C. vii) 1-Bromo-3-chlorobenzene, KHMDS, 1,4-dioxane. viii) HATU, DiPEA, DCM.

***tert*-Butyl 3-chloro-4-fluorobenzoate (60)**

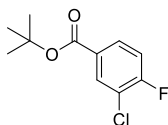

To a solution of 4-fluoro-3-chlorobenzoic acid (1 g, 5.73 mmol, 1 eq.) in *tert*-butanol (50 mL) was added Boc<sub>2</sub>O (3.13 g, 14.3 mmol, 2.5 eq.) and DMAP (210 mg, 1.72 mmol, 0.30 eq.). Then the reaction mixture was stirred 65 °C overnight. The reaction progress was monitored by TLC analysis. Upon full conversion of the starting materials, the solvent was removed under reduced pressure and the residue was purified by silica gel column chromatography (Pentane/EA,100/1) to give the product (1.16 g, 5.04 mmol, 88%). <sup>1</sup>H NMR (500 MHz, CDCl<sub>3</sub>) δ 8.03 (dd, *J* = 7.2, 2.2 Hz, 1H), 7.88 (ddd, *J* = 8.6, 4.7, 2.2 Hz, 1H), 7.17 (t, *J* = 8.6 Hz, 1H), 1.59 (s, 9H). <sup>13</sup>C NMR (126 MHz, CDCl<sub>3</sub>) δ 163.9, 160.9 (d, *J* = 255.2 Hz), 132.3, 129.9 (d, *J* = 8.4 Hz), 129.3 (d, *J* = 3.6 Hz), 121.3 (d, *J* = 18.2 Hz), 116.5 (d, *J* = 21.6 Hz), 82.1, 28.3.

***tert*-Butyl 3-chloro-4-((2-ethoxy-2-oxoethyl)thio)benzoate (61)**

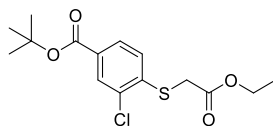

To a solution of **60** (1.16 g, 5.04 mmol, 1eq.) in ACN (10 mL) was added ethyl 2-mercaptoacetate (1.21 g, 10.1 mmol, 2 eq.) and K<sub>2</sub>CO<sub>3</sub> (2.08g, 15.1 mmol, 3 eq.). Then the mixture was stirred overnight. The reaction progress was monitored by TLC analysis. Upon full conversion of the starting materials, the reaction mixture was diluted with DCM (50 mL), washed with water, dried (MgSO<sub>4</sub>), filtered and concentrated under reduced pressure. The residue was purified by silica gel column chromatography (Pentane/Diethyl ether,10/1) to give the product (1.62 g, 4.60 mmol, 91%). <sup>1</sup>H NMR (400 MHz, CDCl<sub>3</sub>) δ 7.94 (d, *J* = 1.8 Hz, 1H), 7.83 (dd, *J* = 8.3, 1.8 Hz, 1H), 7.32 (d, *J* = 8.3 Hz, 1H), 4.20 (q, *J* = 7.1 Hz, 2H), 3.74 (s, 2H), 1.58 (s, 9H), 1.26 (t, *J* = 7.1 Hz, 3H). <sup>13</sup>C NMR (101 MHz, CDCl<sub>3</sub>) δ 168.8, 164.4, 140.6, 132.2, 130.6, 130.5, 128.2, 126.6, 81.8, 62.2, 34.5, 28.3, 14.2.

***tert*-Butyl 3-chloro-4-((2-ethoxy-2-oxoethyl)sulfinyl)benzoate (62)**

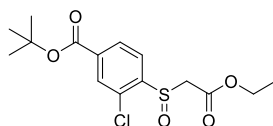

To a cooled solution of **61** (140 mg, 0.42 mmol, 1.00 eq.) in methanol (10mL) was dropwise added a solution of Oxone (26 mg, 0.42 mmol, 1.00 eq.) in water (2 mL) and the reaction mixture was stirred at rt for 2.5 h. The

reaction progress was monitored by TLC analysis. Upon full conversion of the starting materials, the mixture was diluted with water and extracted with DCM. The combined organic layers were washed with brine, dried ( $\text{MgSO}_4$ ), filtered and concentrated under reduced pressure. The residue was purified by silica gel column chromatography (Pentane/Diethyl ether, 5/1) to afford the product (147 mg, 0.42 mmol, quant.).  $^1\text{H}$  NMR (400 MHz,  $\text{CDCl}_3$ )  $\delta$  8.12 (d,  $J$  = 8.1 Hz, 1H), 8.06 – 7.92 (m, 2H), 4.29 – 4.18 (m, 2H), 4.03 (d,  $J$  = 13.1 Hz, 1H), 3.69 (d,  $J$  = 13.8 Hz, 1H), 1.61 (s, 9H), 1.26 (t,  $J$  = 7.0 Hz, 3H).  $^{13}\text{C}$  NMR (126 MHz,  $\text{CDCl}_3$ )  $\delta$  = 164.5, 163.6, 145.2, 136.5, 130.8, 130.1, 128.8, 126.5, 82.7, 62.4, 58.1, 28.2, 14.2.

**3-Chloro-4-((2-ethoxy-2-oxoethyl)sulfinyl)benzoic acid (63)**

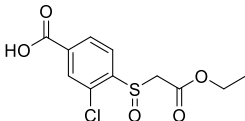

To a solution of **62** (1.39 g, 4.00 mmol, 1 eq.) in DCM (16 mL) was added 4 mL TFA and the reaction mixture was stirred for 6 h. The reaction progress was monitored by TLC analysis. Upon full conversion of the starting materials, the solvent was removed under reduced pressure and the residue was purified by silica gel column chromatography (DCM/MeOH, 10/1) to afford the product (1.04 g, 3.59 mmol, 90%).  $^1\text{H}$  NMR (500 MHz,  $\text{CDCl}_3$ )  $\delta$  8.17 (dd,  $J$  = 8.1, 1.5 Hz, 1H), 8.07 (d,  $J$  = 1.5, 1H), 7.99 (d,  $J$  = 8.1, 1H), 4.26 – 4.14 (m, 2H), 4.04 (d,  $J$  = 14.0 Hz, 1H), 3.72 (d,  $J$  = 14.0 Hz, 1H), 1.23 (t,  $J$  = 7.1 Hz, 3H).  $^{13}\text{C}$  NMR (126 MHz,  $\text{CDCl}_3$ )  $\delta$  166.5, 164.5, 145.4, 135.0, 131.2, 130.2, 129.3, 126.7, 62.5, 58.0, 14.1.

**5,6-Dimethyl-2,3-dihydropyrazine (65)**

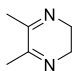

To a cooled (0°C) solution of ethylenediamine (6.6 mL, 100 mmol) in  $\text{Et}_2\text{O}$  (250 mL) was dropwise added a solution of 2,3-butanedione (8.8 mL, 100 mmol) in  $\text{Et}_2\text{O}$  (250 mL) and the suspension was allowed to stir for 16 h. The resulting clear liquid was dried using potassium hydroxide for 30 min. After filtration, the mixture was concentrated and the residue was purified by short-neck distillation which yielded the product (9.36 g, 85 mmol, 85%).  $^1\text{H}$  NMR (400 MHz,  $\text{CDCl}_3$ )  $\delta$  3.36 (s, 4H), 2.15 (s, 6H).  $^{13}\text{C}$  NMR (101 MHz,  $\text{CDCl}_3$ )  $\delta$  159.5, 44.9, 23.4.

**(±) *trans*-2,3-Dimethylpiperazine (± 66)**

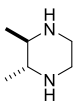

To a solution of **65** (9.36 g, 85 mmol, 1 eq.) in absolute ethanol (300 mL) was portion wise added sodium metal (23 g, 1 mol, 11.8 eq.) over six hours, after which the solution was refluxed for an additional 16 h. The slurry was neutralized by addition of acetic acid (50 mL) at 0 °C. The suspension was diluted with DCM, after stirring for 30 min the precipitated sodium acetate was filtered off. The filtrate was concentrated under reduced pressure and the residue was purified by silica gel column chromatography ( $\text{Et}_2\text{O}$ : MeOH:  $\text{NH}_4\text{OH}$ , 10:4:1) to afford the product (3.71 g, 32.5 mmol, 38%).  $^1\text{H}$  NMR (500 MHz,  $\text{CDCl}_3$ )  $\delta$  3.90 (s, 1H), 2.98 (m, 4H), 2.53 (m, 2H), 1.12-1.09 (m, 6H).

<sup>13</sup>C NMR (126 MHz, CDCl<sub>3</sub>) δ 57.2, 45.8, 18.5.

**(±) *trans*-1-(3-Chlorophenyl)-2,3-dimethylpiperazine (± 67)**

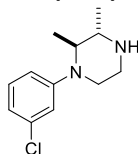

To a solution of **± 66** (0.70 g, 6.1 mmol, 1 eq.) in anhydrous dioxane (17 ml) were added 1-bromo-2-chlorobenzene (0.60 ml, 6.1 mmol, 1 eq.) and KHMDS solution (1M in THF, 6.1 ml, 6.1 mmol, 1 eq.). The reaction mixture was stirred at RT for 2 h. The reaction progress was monitored by TLC analysis. Upon full conversion of the starting materials, the mixture was diluted with DCM, washed with water, dried (MgSO<sub>4</sub>), filtered and concentrated under reduced pressure. The crude product was purified using column chromatography (1% -> 10% MeOH in DCM with 1% TEA) to yield the product (0.51 mg, 2.0 mmol, 32%). <sup>1</sup>H NMR (400 MHz, CDCl<sub>3</sub>) δ 7.20 (t, *J* = 8.1 Hz, 1H), 6.97 (t, *J* = 2.2 Hz, 1H), 6.89 (dddd, *J* = 18.0, 8.3, 2.1, 0.9 Hz, 2H), 3.24 – 2.82 (m, 6H), 1.31 (d, *J* = 6.6 Hz, 3H), 1.05 (d, *J* = 6.4 Hz, 3H). <sup>13</sup>C NMR (400 MHz, CDCl<sub>3</sub>) δ 153.01, 134.81, 130.07, 121.22, 120.23, 118.30, 57.84, 54.59, 48.88, 42.59, 19.04, 14.91

**(±) Ethyl 2-((2-chloro-4-(4-(3-chlorophenyl)-*trans*-2,3-dimethylpiperazine-1-carbonyl)phenyl)sulfinyl)acetate (± 2)**

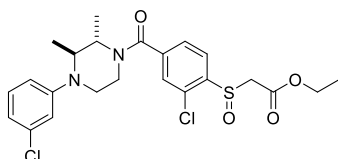

To a suspension of **63** (30 mg, 0.10 mmol, 1 eq.) in DCM (3 mL) was added HATU (39.2 mg, 0.10 mmol, 1.00 eq.) and DiPEA (31 mg, 0.30 mmol, 3 eq.). The mixture was stirred for 1 h. Then **± 66** (23.2 mg, 0.10 μmol, 1 eq.) was added and reaction mixture was stirred overnight. The reaction progress was monitored by TLC analysis. Upon full conversion of the starting materials, the mixture was diluted with DCM, washed with water, dried (MgSO<sub>4</sub>), filtered and concentrated under reduced pressure. The crude product was purified using prep-HPLC to yield the product (38.3 mg, 77.3 μmol, 75 %). <sup>1</sup>H NMR (500 MHz, CDCl<sub>3</sub>) δ 8.01 (d, *J* = 8.0 Hz, 1H), 7.54 (dd, *J* = 8.0, 1.6 Hz, 1H), 7.51 – 7.42 (m, 1H), 7.16 (t, *J* = 8.0 Hz, 1H), 6.83 – 6.78 (m, 2H), 6.70 (d, *J* = 8.4 Hz, 1H), 4.80 (t, *J* = 6.7 Hz, 1H), 4.62 (s, 1H), 4.29 – 4.17 (m, 2H), 4.04 (dd, *J* = 14.1, 1.7 Hz, 1H), 3.87 (d, *J* = 7.0 Hz, 1H), 3.69 (dd, *J* = 14.0, 1.2 Hz, 1H), 3.67 – 3.60 (m, 1H), 3.57 – 3.49 (m, 1H), 3.37 – 3.06 (m, 3H), 1.52 – 1.44 (m, 3H), 1.27 (t, *J* = 7.1 Hz, 3H), 1.16 – 0.97 (m, 3H). <sup>13</sup>C NMR (126 MHz, CDCl<sub>3</sub>) δ 168.8, 168.3, 164.5, 151.3, 142.4, 140.5, 135.3, 130.8, 130.4, 128.4, 127.7, 127.1, 126.3, 125.8, 119.5, 116.3, 114.3, 62.5, 58.4, 56.2, 55.6, 49.8, 42.4, 41.3, 40.5, 36.6, 17.8, 16.8, 14.2, 12.8, 12.6. HRMS: Calculated for [C<sub>23</sub>H<sub>27</sub>Cl<sub>2</sub>N<sub>2</sub>O<sub>4</sub>S + H]<sup>+</sup> = 497.1063, found = 497.1065.

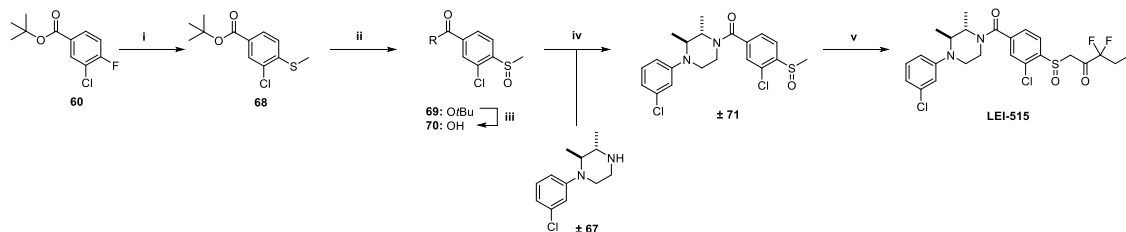

**Scheme 3.** Synthesis route for LEI-515. Reagents and conditions: i) NaSMe, K<sub>2</sub>CO<sub>3</sub>, ACN. ii) Oxone, MeOH / H<sub>2</sub>O. iii) TFA, DCM. iv) EDCI, HOBt, DiPEA, DCM. v) Ethyl 2,2-difluorobutanoate, LDA, THF, -78 °C.

### ***tert*-Butyl 3-chloro-4-(methylthio)benzoate (68)**

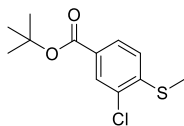

To a solution of *tert*-butyl 3-chloro-4-fluorobenzoate (0.51 g, 2.22 mmol, 1 eq.) in degassed DMF was added sodium methanethiolate (0.23 g, 3.32 mmol, 1.5 eq.) at -10 °C and the mixture was stirred at RT overnight. The reaction progress was monitored by TLC. Once completed, the mixture was diluted with Et<sub>2</sub>O, washed with water, dried over anhydrous MgSO<sub>4</sub> and concentrated under reduced pressure. The residue was purified using column chromatography (Et<sub>2</sub>O / pentane, 10%) to yield the product (0.24 g, 0.91 mmol, 41%). <sup>1</sup>H NMR (400 MHz, CDCl<sub>3</sub>) δ 7.91 (d, *J* = 1.8 Hz, 1H), 7.85 (dd, *J* = 8.3, 1.8 Hz, 1H), 7.13 (d, *J* = 8.4 Hz, 1H), 2.49 (s, 3H), 1.59 (s, 9H). <sup>13</sup>C NMR (400 MHz, CDCl<sub>3</sub>) δ 164.54, 143.80, 130.83, 129.94, 129.04, 128.05, 123.94, 81.49, 28.22, 14.92.

### ***tert*-Butyl 3-chloro-4-(methylsulfinyl)benzoate (69)**

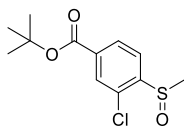

To a cooled (0 °C) solution of **68** (0.24 g, 0.91 mmol, 1 eq.) in MeOH was dropwise added an Oxone (0.50 g, 0.82 mmol, 0.9 eq.) in water and the mixture was stirred at RT for 2h. The reaction progress was monitored by TLC analysis. Upon full conversion of the starting materials, the mixture was diluted with EtOAc and washed with water. The organic layer was dried (MgSO<sub>4</sub>), filtered and concentrated under reduced pressure. The residue was purified by silica column chromatography (pentane/EtOAc, 5/1) to yield the product (0.29 g, 1.17 mmol, quant.). <sup>1</sup>H NMR (500 MHz, CDCl<sub>3</sub>) δ 8.13 (dd, *J* = 8.0, 1.6 Hz, 1H), 8.03 – 7.98 (m, 2H), 2.86 (s, 3H), 1.62 (s, 9H). <sup>13</sup>C NMR (500 MHz, CDCl<sub>3</sub>) δ 163.34, 147.97, 135.70, 130.48, 129.52, 128.73, 125.20, 82.24, 41.37, 27.94.

### **3-Chloro-4-(methylsulfinyl)benzoic acid (70)**

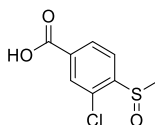

To a solution of **69** (0.26 g, 0.94 mmol) in DCM (8 mL) was added TFA (2 mL) and the reaction mixture was stirred

for 6.5 h. The reaction progress was monitored by TLC analysis. Upon full conversion of the starting materials, the solvent was removed and the residue was purified by silica column chromatography (DCM/MeOH, 10/1) to yield the product (0.19 g, 0.87 mmol, 92%). <sup>1</sup>H NMR (400 MHz, MeOD) δ 8.22 (dd, *J* = 8.2, 1.6 Hz, 1H), 8.08 (d, *J* = 1.6 Hz, 1H), 7.98 (d, *J* = 8.1 Hz, 1H), 2.90 (s, 3H). <sup>13</sup>C NMR (400 MHz, MeOD) δ 167.19, 148.93, 136.49, 132.03, 131.20, 130.45, 126.47, 41.68.

**(±) (3-Chloro-4-(methylsulfinyl)phenyl)(4-(3-chlorophenyl)-trans-2,3-dimethylpiperazin-1-yl)methanone (± 70)**

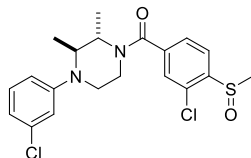

To a stirred suspension of 3-chloro-4-((2-ethoxy-2-oxoethyl)sulfinyl)benzoic acid (0.19 g, 0.87 mmol, 1 eq.) in DCM (10 mL) were added **± 67** (0.23 g, 1.04 mmol, 1.2 eq.), DIPEA (0.34 mg, 2.59 mmol, 3 eq.), HOBT (0.18 mg, 1.30 mmol, 1.5 eq.) and EDCl (0.25 mg, 1.30 mmol, 1.5 eq.). The mixture was stirred overnight. The reaction progress was monitored by TLC analysis. Once completed, the mixture was washed with water and brine, dried over anhydrous MgSO<sub>4</sub>, filtered and concentrated. The crude product was purified using column chromatography (EtOAc / pentane, 60 %) to yield the product (0.27 g, 0.64 mmol, 74%). <sup>1</sup>H NMR (400 MHz, CDCl<sub>3</sub>) δ 8.04 – 7.97 (m, 2H), 7.56 – 7.38 (m, 2H), 7.14 (t, *J* = 8.2 Hz, 1H), 6.60 (d, *J* = 2.4 Hz, 1H), 6.56 – 6.47 (m, 1H), 4.85 – 4.49 (m, 1H), 3.98 – 3.07 (m, 5H), 2.82 (s, 3H), 1.42 – 1.33 (m, 3H), 1.28 – 1.06 (m, 3H). <sup>13</sup>C NMR (126 MHz, CDCl<sub>3</sub>) δ 168.83, 151.33, 145.25, 140.18, 135.19, 130.47, 130.33, 128.43, 127.77, 125.85, 119.34, 116.13, 114.19, 56.08, 49.57, 42.29, 41.64, 36.46, 17.76, 12.52.

**(±) 1-((2-Chloro-4-(4-(3-chlorophenyl)-trans-2,3-dimethylpiperazine-1-carbonyl)phenyl)sulfinyl)-3,3-difluoropentan-2-one (LEI-515)**

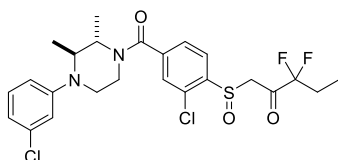

To a solution of **± 70** (20 mg, 0.05 mmol, 1 eq.) in THF (5 mL) was added LDA (0.025 mL, 2 M in THF, 0.05 mmol, 1 eq.) at -78 °C and the mixture was stirred for 10 min. Then ethyl 2,2-difluorobutanoate (72 mg, 0.47 mmol, 10 eq.) was added and the reaction mixture was stirred for 2 h at RT. The mixture was diluted with DCM (20 mL) and washed with water and brine, dried over anhydrous MgSO<sub>4</sub>, filtered and concentrated. The crude product was purified using prep-HPLC to yield the product (2.5 mg, 0.05 mmol, 10%). <sup>1</sup>H NMR (500 MHz, CDCl<sub>3</sub>) δ 8.04 (dd, *J* = 8.1, 4.5 Hz, 1H), 7.62 – 7.49 (m, 2H), 7.22 (t, *J* = 8.3 Hz, 1H), 6.89 (d, *J* = 7.2 Hz, 2H), 6.81 (d, *J* = 8.4 Hz, 1H), 4.41 (dd, *J* = 15.1, 4.3 Hz, 1H), 4.05 (dd, *J* = 15.2, 3.4 Hz, 1H), 3.85 – 3.13 (m, 8H), 2.17 – 2.02 (m, 3H), 1.54 (d, *J* = 6.8 Hz, 3H), 1.08 (t, *J* = 7.5 Hz, 3H). <sup>13</sup>C NMR (101 MHz, CDCl<sub>3</sub>) δ 168.65, 168.17, 151.36, 142.26, 140.93,

431 135.33, 130.65, 130.40, 128.67, 127.08, 126.51, 119.55, 118.14 (t, J = 253 Hz), 116.30, 114.28, 60.15, 56.22,  
432 49.70, 40.52, 36.57, 25.52 (t, J = 23 Hz), 17.86, 12.60, 5.47 (t, J = 5 Hz). HRMS: Calculated for [C<sub>24</sub>H<sub>26</sub>Cl<sub>2</sub>F<sub>2</sub>N<sub>2</sub>O<sub>3</sub>S  
433 + H<sub>2</sub>O + H]<sup>+</sup> = 549.1188, found = 549.1183.  
434

435      **Uncropped gels S3**

436

437

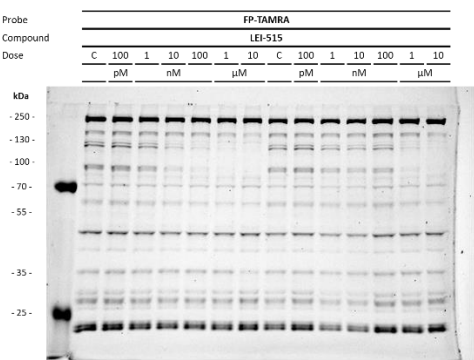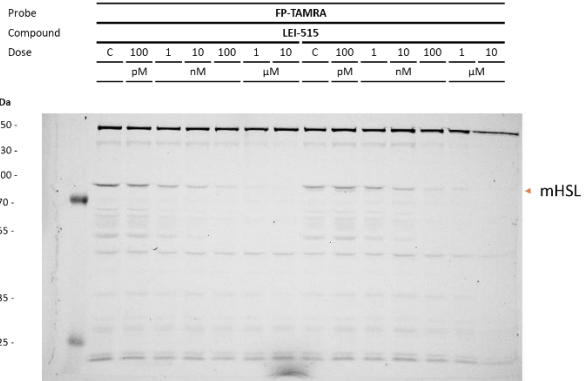

438

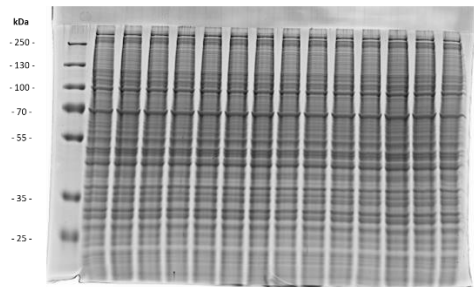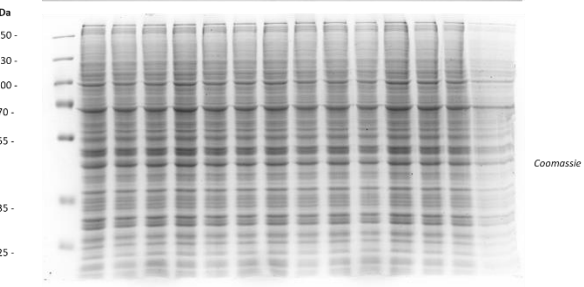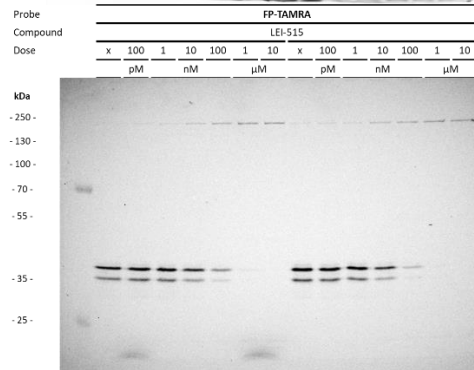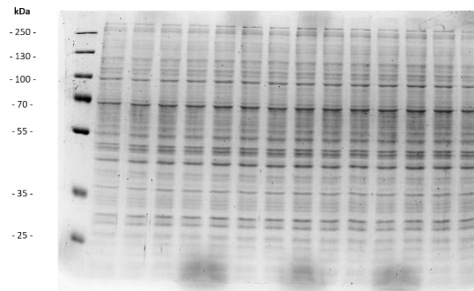

439

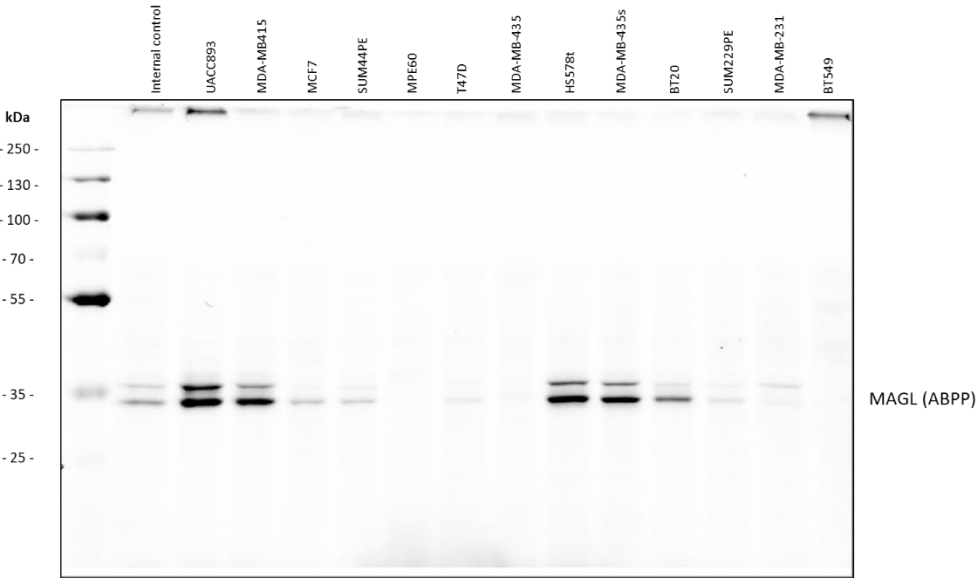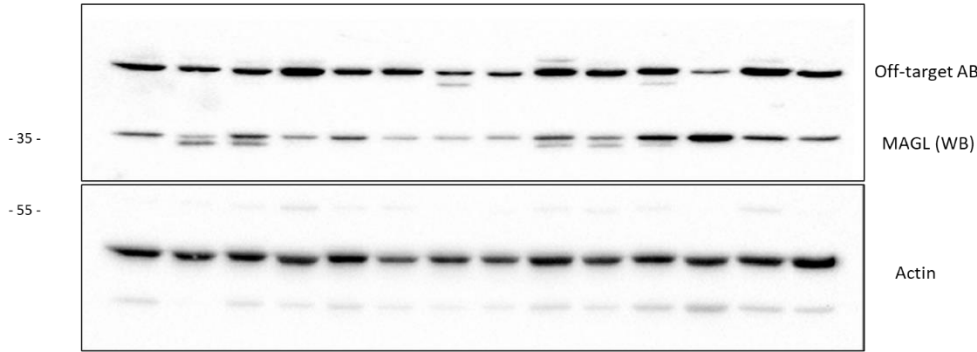

Supplement: MOESM1 [file 41467_2023_43606_MOESM1_ESM.pdf]
