# Supplementary material for: A monoacylglycerol lipase inhibitor showing therapeutic efficacy in mice without central side effects or dependence
Source: Nat Commun. 2023 Dec 5;14:8039. doi: 10.1038/s41467-023-43606-3 (PMC10698032; doi:10.1038/s41467-023-43606-3)
Supplement: Supplementary file 4 — Source Data [file 41467_2023_43606_MOESM4_ESM.xlsx]

## Sheet: Figure 2c
Cycle Nr.	1	2	3	4	5	6	7	8	9	10	11	12		Corrected data		Cycle Nr.	1	2	3	4	5	6	7	8	9	10	11	12		Slope		R^		Plate layout														Cycle Nr.	1
Time [s]	0	300	600	900	1200	1500.1	1800.1	2100.1	2400.1	2700.1	3000.1	3300.1				Time [s]	0	300	600	900	1200	1500	1800	2100.1	2400.1	2700.1	3000.1	3300.1							1	2	3	4	5	6	7	8	9	10	11	12		Time [s]	0
Temp. [°C]	23.8	24.1	24.2	24.2	24.3	24.4	24.5	24.5	24.6	24.5	24.5	24.5				Time [min]	0	5	10	15	20	25	30	35.0017	40.0017	45.0017	50.0017	55.0017						A	MAGL													Temp. [°C]	25.3
A1	530	693	989	1364	1764	2201	2584	2943	3348	3649	3968	4189				A1	-52.25	21	233.25	534.25	858.25	1244.25	1584	1890.5	2245.5	2513.5	2792.5	2974.75	A1	67.14		0.996671		B														A1	95
A2	519	669	918	1241	1615	2002	2390	2757	3071	3436	3701	3920				A2	-63.25	-3	162.25	411.25	709.25	1045.25	1390	1704.5	1968.5	2300.5	2525.5	2705.75	A2	58.94		0.995647		C			Hit 1											A2	92
A3	541	641	885	1194	1541	1939	2334	2688	3013	3314	3622	3860				A3	-41.25	-31	129.25	364.25	635.25	982.25	1334	1635.5	1910.5	2178.5	2446.5	2645.75	A3	56.6		0.992033		D														A3	73
A4	501	603	749	949	1191	1471	1759	2064	2332	2605	2879	3087				A4	-81.25	-69	-6.75	119.25	285.25	514.25	759	1011.5	1229.5	1469.5	1703.5	1872.75	A4	34.58		0.982394		E														A4	86
A5	512	567	668	773	897	1050	1185	1348	1512	1698	1840	2015				A5	-70.25	-105	-87.75	-56.75	-8.75	93.25	185	295.5	409.5	562.5	664.5	800.75	A5	11.82		0.929297		F														A5	85
A6	503	560	603	679	726	799	869	944	1023	1120	1189	1262				A6	-79.25	-112	-152.75	-150.75	-179.75	-157.75	-131	-108.5	-79.5	-15.5	13.5	47.75	A6	-0.88		0.181614		G	MOCK													A6	80
A7	486	565	622	673	717	784	812	880	920	978	1035	1078				A7	-96.25	-107	-133.75	-156.75	-188.75	-172.75	-188	-172.5	-182.5	-157.5	-140.5	-136.25	A7	-2.98		0.671638		H														A7	76
A8	479	548	623	723	841	966	1108	1259	1398	1569	1720	1885				A8	-103.25	-124	-132.75	-106.75	-64.75	9.25	108	206.5	295.5	433.5	544.5	670.75	A8	9.36		0.948977		Plate 1														A8	0
A9	532	584	752	995	1296	1604	1937	2275	2568	2926	3143	3411				A9	-50.25	-88	-3.75	165.25	390.25	647.25	937	1222.5	1465.5	1790.5	1967.5	2196.75	A9	43.56		0.991784			1	2	3	4	5	6	7	8	9	10	11	12		A9	0
A10	500	603	809	1094	1485	1870	2277	2707	3008	3361	3633	3881				A10	-82.25	-69	53.25	264.25	579.25	913.25	1277	1654.5	1905.5	2225.5	2457.5	2666.75	A10	57.9		0.990209		A	67.14	58.94	56.6	34.58	11.82	-0.88	-2.98	9.36	43.56	57.9	60.18	56.88		A10	0
A11	510	619	827	1138	1544	1921	2326	2740	3071	3440	3703	3936				A11	-72.25	-53	71.25	308.25	638.25	964.25	1326	1687.5	1968.5	2304.5	2527.5	2721.75	A11	60.18		0.994616		B	65.44	63.04	59.56	37	10.26	-1.68	-4.56	8.32	42.5	57.82	52.28	56.6		A11	1
A12	516	613	806	1107	1474	1858	2260	2616	3001	3331	3561	3860				A12	-66.25	-59	50.25	277.25	568.25	901.25	1260	1563.5	1898.5	2195.5	2385.5	2645.75	A12	56.88		0.993043		C	-13.52	-13.5	64.32	51.08	12.02	-1.48	-2.46	-4.68	1.58	22.6	49.58	51.12		A12	0
B1	560	738	1038	1397	1796	2222	2645	3062	3394	3720	3985	4299				B1	-22.25	66	282.25	567.25	890.25	1265.25	1645	2009.5	2291.5	2584.5	2809.5	3084.75	B1	65.44		0.996213		D	-13.58	-13.52	65	52.08	15.1	-0.8	-2.38	-5.52	1.72	25.14	47.52	54.22		B1	87
B2	521	701	964	1326	1713	2112	2545	2914	3240	3566	3865	4143				B2	-61.25	29	208.25	496.25	807.25	1155.25	1545	1861.5	2137.5	2430.5	2689.5	2928.75	B2	63.04		0.998172		E	-13.52	-13.52	78.12	58.74	45.34	8.52	-0.14	5.76	19.48	50.72	59.5	61.08		B2	87
B3	518	670	926	1245	1623	2019	2410	2803	3157	3504	3754	4037				B3	-64.25	-2	170.25	415.25	717.25	1062.25	1410	1750.5	2054.5	2368.5	2578.5	2822.75	B3	59.56		0.994372		F	-13.5	-13.52	78.44	65.8	43.54	9.3	0.1	4.58	21.74	51.86	59.84	61.54		B3	85
B4	511	632	725	955	1219	1480	1775	2072	2331	2609	2887	3092				B4	-71.25	-40	-30.75	125.25	313.25	523.25	775	1019.5	1228.5	1473.5	1711.5	1877.75	B4	37		0.995729		G	-0.28	0.5	56.18	23.08	10.64	2.16	-4.38	6.16	24.92	44.74	55.56	64.8		B4	73
B5	533	568	666	768	892	1022	1165	1332	1489	1667	1823	1972				B5	-49.25	-104	-89.75	-61.75	-13.75	65.25	165	279.5	386.5	531.5	647.5	757.75	B5	10.26		0.952493		H	-0.38	0.16	60.3	23.82	13.76	1.62	-3.54	7.34	24.1	51.04	59.3	62.74		B5	86
B6	493	562	633	680	747	809	882	943	1018	1115	1175	1258				B6	-89.25	-110	-122.75	-149.75	-158.75	-147.75	-118	-109.5	-84.5	-20.5	-0.5	43.75	B6	-1.68		0.494118																B6	85
B7	496	575	637	684	727	773	827	880	924	980	1042	1080				B7	-86.25	-97	-118.75	-145.75	-178.75	-183.75	-173	-172.5	-178.5	-155.5	-133.5	-134.25	B7	-4.56		0.935637																B7	86
B8	516	555	632	724	844	957	1090	1222	1361	1518	1672	1835				B8	-66.25	-117	-123.75	-105.75	-61.75	0.25	90	169.5	258.5	382.5	496.5	620.75	B8	8.32		0.946696																B8	0
B9	533	595	770	1006	1287	1611	1908	2244	2574	2849	3155	3401				B9	-49.25	-77	14.25	176.25	381.25	654.25	908	1191.5	1471.5	1713.5	1979.5	2186.75	B9	42.5		0.986406																B9	0
B10	506	617	814	1107	1485	1878	2278	2672	3010	3354	3635	3897				B10	-76.25	-55	58.25	277.25	579.25	921.25	1278	1619.5	1907.5	2218.5	2459.5	2682.75	B10	57.82		0.990813																B10	0
B11	531	666	893	1096	1485	1861	2306	2692	3022	3354	3632	3883				B11	-51.25	-6	137.25	266.25	579.25	904.25	1306	1639.5	1919.5	2218.5	2456.5	2668.75	B11	52.28		0.968579																B11	0
B12	531	620	803	1110	1484	1848	2273	2638	3014	3320	3653	3914				B12	-51.25	-52	47.25	280.25	578.25	891.25	1273	1585.5	1911.5	2184.5	2477.5	2699.75	B12	56.6		0.995711																B12	0
C1	0	2	2	3	3	3	3	3	3	3	3	3				C1	-582.25	-670	-753.75	-826.75	-902.75	-953.75	-997	-1049.5	-1099.5	-1132.5	-1172.5	-1211.25	C1	-13.52		0.993038																C1	0
C2	0	2	2	2	3	3	3	3	3	3	3	3				C2	-582.25	-670	-753.75	-827.75	-902.75	-953.75	-997	-1049.5	-1099.5	-1132.5	-1172.5	-1211.25	C2	-13.5		0.992874																C2	0
C3	571	663	922	1265	1680	2082	2514	2885	3240	3574	3810	4065				C3	-11.25	-9	166.25	435.25	774.25	1125.25	1514	1832.5	2137.5	2438.5	2634.5	2850.75	C3	64.32		0.996437																C3	90
C4	542	650	899	1185	1493	1874	2210	2548	2867	3150	3459	3740				C4	-40.25	-22	143.25	355.25	587.25	917.25	1210	1495.5	1764.5	2014.5	2283.5	2525.75	C4	51.08		0.988527																C4	87
C5	509	595	708	818	946	1092	1226	1409	1550	1746	1911	2050				C5	-73.25	-77	-47.75	-11.75	40.25	135.25	226	356.5	447.5	610.5	735.5	835.75	C5	12.02		0.952195																C5	89
C6	525	557	631	703	759	814	890	939	998	1066	1141	1202				C6	-57.25	-115	-124.75	-126.75	-146.75	-142.75	-110	-113.5	-104.5	-69.5	-34.5	-12.25	C6	-1.48		0.738005																C6	94
C7	494	572	643	694	758	807	845	887	938	992	1022	1066				C7	-88.25	-100	-112.75	-135.75	-147.75	-149.75	-155	-165.5	-164.5	-143.5	-153.5	-148.25	C7	-2.46		0.872743																C7	94
C8	513	587	644	692	735	778	801	838	865	894	903	931				C8	-69.25	-85	-111.75	-137.75	-170.75	-178.75	-199	-214.5	-237.5	-241.5	-272.5	-283.25	C8	-4.68		0.953937																C8	0
C9	531	586	666	725	808	891	976	1070	1147	1231	1313	1398				C9	-51.25	-86	-89.75	-104.75	-97.75	-65.75	-24	17.5	44.5	95.5	137.5	183.75	C9	1.58		0.360856																C9	1
C10	496	595	719	871	1048	1263	1485	1719	1939	2200	2389	2606				C10	-86.25	-77	-36.75	41.25	142.25	306.25	485	666.5	836.5	1064.5	1213.5	1391.75	C10	22.6		0.970672																C10	0
C11	539	608	800	1054	1389	1741	2090	2433	2782	3076	3372	3619				C11	-43.25	-64	44.25	224.25	483.25	784.25	1090	1380.5	1679.5	1940.5	2196.5	2404.75	C11	49.58		0.988011																C11	0
C12	535	606	785	1075	1391	1758	2145	2501	2830	3163	3443	3664				C12	-47.25	-66	29.25	245.25	485.25	801.25	1145	1448.5	1727.5	2027.5	2267.5	2449.75	C12	51.12		0.991997																C12	0
D1	0	2	2	3	3	2	2	2	3	3	2	2				D1	-582.25	-670	-753.75	-826.75	-902.75	-954.75	-998	-1050.5	-1099.5	-1132.5	-1173.5	-1212.25	D1	-13.58		0.993676																D1	0
D2	1	2	2	3	3	3	3	3	3	3	3	3				D2	-581.25	-670	-753.75	-826.75	-902.75	-953.75	-997	-1049.5	-1099.5	-1132.5	-1172.5	-1211.25	D2	-13.52		0.993038																D2	0
D3	542	704	995	1313	1750	2159	2601	2968	3319	3668	3916	4239				D3	-40.25	32	239.25	483.25	844.25	1202.25	1601	1915.5	2216.5	2532.5	2740.5	3024.75	D3	65		0.992541																D3	83
D4	548	651	858	1152	1495	1838	2220	2546	2868	3167	3455	3727				D4	-34.25	-21	102.25	322.25	589.25	881.25	1220	1493.5	1765.5	2031.5	2279.5	2512.75	D4	52.08		0.996121																D4	96
D5	525	594	696	829	964	1129	1296	1481	1667	1817	2014	2203				D5	-57.25	-78	-59.75	-0.75	58.25	172.25	296	428.5	564.5	681.5	838.5	988.75	D5	15.1		0.969142																D5	93
D6	510	585	648	725	776	844	915	972	1054	1109	1170	1226				D6	-72.25	-87	-107.75	-104.75	-129.75	-112.75	-85	-80.5	-48.5	-26.5	-5.5	11.75	D6	-0.8		0.213904																D6	89
D7	508	571	643	714	770	811	872	911	956	1015	1041	1093				D7	-74.25	-101	-112.75	-115.75	-135.75	-145.75	-128	-141.5	-146.5	-120.5	-134.5	-121.25	D7	-2.38		0.935646																D7	97
D8	520	585	643	681	733	760	802	824	855	880	905	942				D8	-62.25	-87	-112.75	-148.75	-172.75	-196.75	-198	-228.5	-247.5	-255.5	-270.5	-272.25	D8	-5.52		0.988785																D8	0
D9	533	577	651	728	809	879	960	1069	1152	1226	1308	1398				D9	-49.25	-95	-104.75	-101.75	-96.75	-77.75	-40	16.5	49.5	90.5	132.5	183.75	D9	1.72		0.838549																D9	0
D10	500	591	703	855	1057	1281	1504	1745	1969	2225	2439	2646				D10	-82.25	-81	-52.75	25.25	151.25	324.25	504	692.5	866.5	1089.5	1263.5	1431.75	D10	25.14		0.972233																D10	1
D11	545	617	806	1059	1378	1718	2074	2432	2757	3082	3371	3610				D11	-37.25	-55	50.25	229.25	472.25	761.25	1074	1379.5	1654.5	1946.5	2195.5	2395.75	D11	47.52		0.989341																D11	0
D12	540	617	812	1101	1443	1828	2231	2571	2953	3269	3539	3789				D12	-42.25	-55	56.25	271.25	537.25	871.25	1231	1518.5	1850.5	2133.5	2363.5	2574.75	D12	54.22		0.990419																D12	0
E1	0	2	2	3	3	3	2	3	3	3	2	3				E1	-582.25	-670	-753.75	-826.75	-902.75	-953.75	-998	-1049.5	-1099.5	-1132.5	-1173.5	-1211.25	E1	-13.52		0.993038																E1	0
E2	0	2	2	3	3	3	3	3	2	3	3	3				E2	-582.25	-670	-753.75	-826.75	-902.75	-953.75	-997	-1049.5	-1100.5	-1132.5	-1172.5	-1211.25	E2	-13.52		0.993038																E2	0
E3	582	824	1176	1620	2092	2547	2959	3346	3691	4090	4324	4495				E3	-0.25	152	420.25	790.25	1186.25	1590.25	1959	2293.5	2588.5	2954.5	3148.5	3280.75	E3	78.12		0.9996																E3	96
E4	525	673	915	1229	1620	1990	2373	2750	3119	3436	3680	3934				E4	-57.25	1	159.25	399.25	714.25	1033.25	1373	1697.5	2016.5	2300.5	2504.5	2719.75	E4	58.74		0.995816																E4	96
E5	519	677	893	1143	1455	1771	2087	2420	2733	3070	3288	3551				E5	-63.25	5	137.25	313.25	549.25	814.25	1087	1367.5	1630.5	1934.5	2112.5	2336.75	E5	45.34		0.992169																E5	87
E6	515	589	693	790	902	1024	1143	1292	1436	1546	1683	1810				E6	-67.25	-83	-62.75	-39.75	-3.75	67.25	143	239.5	333.5	410.5	507.5	595.75	E6	8.52		0.937957																E6	100
E7	531	609	669	746	821	868	935	991	1033	1103	1168	1210				E7	-51.25	-63	-86.75	-83.75	-84.75	-88.75	-65	-61.5	-69.5	-32.5	-7.5	-4.25	E7	-0.14		0.166102																E7	91
E8	506	597	675	779	870	967	1052	1136	1243	1317	1460	1538				E8	-76.25	-75	-80.75	-50.75	-35.75	10.25	52	83.5	140.5	181.5	284.5	323.75	E8	5.76		0.960667																E8	0
E9	543	611	743	899	1061	1240	1485	1668	1886	2092	2286	2456				E9	-39.25	-61	-12.75	69.25	155.25	283.25	485	615.5	783.5	956.5	1110.5	1241.75	E9	19.48		0.987484																E9	0
E10	522	628	822	1079	1417	1781	2128	2503	2814	3167	3414	3689				E10	-60.25	-44	66.25	249.25	511.25	824.25	1128	1450.5	1711.5	2031.5	2238.5	2474.75	E10	50.72		0.986913																E10	0
E11	516	630	832	1132	1522	1920	2301	2695	3038	3392	3697	3946				E11	-66.25	-42	76.25	302.25	616.25	963.25	1301	1642.5	1935.5	2256.5	2521.5	2731.75	E11	59.5		0.991461																E11	0
E12	552	636	843	1161	1531	1964	2348	2761	3140	3454	3761	4010				E12	-30.25	-36	87.25	331.25	625.25	1007.25	1348	1708.5	2037.5	2318.5	2585.5	2795.75	E12	61.08		0.989742																E12	0
F1	1	2	2	2	3	3	3	3	3	3	3	3				F1	-581.25	-670	-753.75	-827.75	-902.75	-953.75	-997	-1049.5	-1099.5	-1132.5	-1172.5	-1211.25	F1	-13.5		0.992874																F1	0
F2	0	2	2	3	3	3	3	3	3	3	3	3				F2	-582.25	-670	-753.75	-826.75	-902.75	-953.75	-997	-1049.5	-1099.5	-1132.5	-1172.5	-1211.25	F2	-13.52		0.993038																F2	0
F3	553	820	1199	1655	2113	2580	3043	3383	3804	4074	4333	4529				F3	-29.25	148	443.25	825.25	1207.25	1623.25	2043	2330.5	2701.5	2938.5	3157.5	3314.75	F3	78.44		0.999549																F3	87
F4	577	680	948	1278	1719	2124	2526	2885	3263	3584	3822	4099				F4	-5.25	8	192.25	448.25	813.25	1167.25	1526	1832.5	2160.5	2448.5	2646.5	2884.75	F4	65.8		0.994266																F4	94
F5	536	661	888	1106	1433	1731	2060	2357	2691	2950	3197	3491				F5	-46.25	-11	132.25	276.25	527.25	774.25	1060	1304.5	1588.5	1814.5	2021.5	2276.75	F5	43.54		0.986395																F5	97
F6	509	599	689	781	905	1029	1166	1304	1416	1572	1710	1844				F6	-73.25	-73	-66.75	-48.75	-0.75	72.25	166	251.5	313.5	436.5	534.5	629.75	F6	9.3		0.934522																F6	94
F7	526	609	678	736	817	879	950	1007	1062	1130	1185	1230				F7	-56.25	-63	-77.75	-93.75	-88.75	-77.75	-50	-45.5	-40.5	-5.5	9.5	15.75	F7	0.1		0.00641849																F7	103
F8	515	612	706	781	882	975	1063	1149	1252	1337	1448	1530				F8	-67.25	-60	-49.75	-48.75	-23.75	18.25	63	96.5	149.5	201.5	272.5	315.75	F8	4.58		0.861171																F8	0
F9	548	608	729	889	1053	1263	1466	1676	1855	2095	2330	2485				F9	-34.25	-64	-26.75	59.25	147.25	306.25	466	623.5	752.5	959.5	1154.5	1270.75	F9	21.74		0.974108																F9	0
F10	515	625	836	1105	1452	1811	2169	2519	2861	3178	3505	3706				F10	-67.25	-47	80.25	275.25	546.25	854.25	1169	1466.5	1758.5	2042.5	2329.5	2491.75	F10	51.86		0.990372																F10	0
F11	506	649	850	1173	1550	1948	2345	2740	3117	3425	3736	4014				F11	-76.25	-23	94.25	343.25	644.25	991.25	1345	1687.5	2014.5	2289.5	2560.5	2799.75	F11	59.84		0.994661																F11	0
F12	562	642	868	1191	1584	1989	2462	2839	3184	3535	3847	4138				F12	-20.25	-30	112.25	361.25	678.25	1032.25	1462	1786.5	2081.5	2399.5	2671.5	2923.75	F12	61.54		0.994111																F12	0
G1	580	680	755	820	903	949	1001	1042	1083	1121	1181	1212				G1	-2.25	8	-0.75	-9.75	-2.75	-7.75	1	-10.5	-19.5	-14.5	5.5	-2.25	G1	-0.28		0.184906																G1	108
G2	588	659	732	823	894	943	991	1040	1090	1132	1152	1208				G2	5.75	-13	-23.75	-6.75	-11.75	-13.75	-9	-12.5	-12.5	-3.5	-23.5	-6.25	G2	0.5		0.204583																G2	110
G3	513	675	898	1216	1551	1949	2325	2667	3060	3374	3633	3894				G3	-69.25	3	142.25	386.25	645.25	992.25	1325	1614.5	1957.5	2238.5	2457.5	2679.75	G3	56.18		0.992656																G3	94
G4	526	605	730	869	1055	1279	1502	1754	2048	2302	2588	2884				G4	-56.25	-67	-25.75	39.25	149.25	322.25	502	701.5	945.5	1166.5	1412.5	1669.75	G4	23.08		0.957821																G4	100
G5	534	605	720	816	950	1079	1238	1408	1595	1785	1975	2160				G5	-48.25	-67	-35.75	-13.75	44.25	122.25	238	355.5	492.5	649.5	799.5	945.75	G5	10.64		0.946695																G5	92
G6	508	594	659	714	811	889	978	1048	1155	1222	1302	1396				G6	-74.25	-78	-96.75	-115.75	-94.75	-67.75	-22	-4.5	52.5	86.5	126.5	181.75	G6	2.16		0.498462																G6	101
G7	533	609	681	721	773	817	853	887	931	980	1004	1047				G7	-49.25	-63	-74.75	-108.75	-132.75	-139.75	-147	-165.5	-171.5	-155.5	-171.5	-167.25	G7	-4.38		0.928487																G7	98
G8	525	600	689	792	891	985	1094	1223	1335	1445	1571	1703				G8	-57.25	-72	-66.75	-37.75	-14.75	28.25	94	170.5	232.5	309.5	395.5	488.75	G8	6.16		0.982843																G8	0
G9	542	639	757	929	1120	1335	1533	1780	2053	2272	2480	2697				G9	-40.25	-33	1.25	99.25	214.25	378.25	533	727.5	950.5	1136.5	1304.5	1482.75	G9	24.92		0.985524																G9	0
G10	534	638	808	1037	1331	1682	2002	2329	2734	3006	3273	3603				G10	-48.25	-34	52.25	207.25	425.25	725.25	1002	1276.5	1631.5	1870.5	2097.5	2388.75	G10	44.74		0.979356																G10	0
G11	505	623	827	1123	1490	1857	2244	2642	2952	3301	3630	3859				G11	-77.25	-49	71.25	293.25	584.25	900.25	1244	1589.5	1849.5	2165.5	2454.5	2644.75	G11	55.56		0.99406																G11	0
G12	522	670	921	1254	1657	2093	2544	2961	3300	3701	4014	4319				G12	-60.25	-2	165.25	424.25	751.25	1136.25	1544	1908.5	2197.5	2565.5	2838.5	3104.75	G12	64.8		0.992486																G12	0
H1	584	679	781	845	923	975	1013	1072	1127	1150	1197	1221				H1	1.75	7	25.25	15.25	17.25	18.25	13	19.5	24.5	14.5	21.5	6.75	H1	-0.38		0.318062																H1	98
H2	577	670	755	831	903	960	995	1056	1110	1139	1172	1216				H2	-5.25	-2	-0.75	1.25	-2.75	3.25	-5	3.5	7.5	3.5	-3.5	1.75	H2	0.16		0.16																H2	101
H3	550	710	963	1304	1686	2067	2496	2919	3284	3630	3915	4195				H3	-32.25	38	207.25	474.25	780.25	1110.25	1496	1866.5	2181.5	2494.5	2739.5	2980.75	H3	60.3		0.997797																H3	101
H4	553	611	746	898	1079	1309	1572	1831	2161	2426	2708	2922				H4	-29.25	-61	-9.75	68.25	173.25	352.25	572	778.5	1058.5	1290.5	1532.5	1707.75	H4	23.82		0.963842																H4	96
H5	529	615	722	841	966	1136	1295	1496	1692	1884	2109	2334				H5	-53.25	-57	-33.75	11.25	60.25	179.25	295	443.5	589.5	748.5	933.5	1119.75	H5	13.76		0.937166																H5	96
H6	515	601	680	764	843	907	1007	1092	1182	1269	1351	1440				H6	-67.25	-71	-75.75	-65.75	-62.75	-49.75	7	39.5	79.5	133.5	175.5	225.75	H6	1.62		0.951559																H6	93
H7	523	585	650	711	763	800	860	882	938	968	1008	1033				H7	-59.25	-87	-105.75	-118.75	-142.75	-156.75	-140	-170.5	-164.5	-167.5	-167.5	-181.25	H7	-3.54		0.985964																H7	76
H8	528	609	706	812	916	1020	1160	1265	1390	1515	1660	1770				H8	-54.25	-63	-49.75	-17.75	10.25	63.25	160	212.5	287.5	379.5	484.5	555.75	H8	7.34		0.977885																H8	0
H9	545	575	704	841	1039	1266	1482	1700	1934	2170	2361	2611				H9	-37.25	-97	-51.75	11.25	133.25	309.25	482	647.5	831.5	1034.5	1185.5	1396.75	H9	24.1		0.957866																H9	0
H10	528	651	852	1120	1471	1812	2181	2493	2907	3236	3522	3834				H10	-54.25	-21	96.25	290.25	565.25	855.25	1181	1440.5	1804.5	2100.5	2346.5	2619.75	H10	51.04		0.992315																H10	0
H11	560	679	876	1182	1565	1963	2379	2773	3122	3488	3734	4024				H11	-22.25	7	120.25	352.25	659.25	1006.25	1379	1720.5	2019.5	2352.5	2558.5	2809.75	H11	59.3		0.992397																H11	0
H12	560	662	890	1239	1611	2038	2528	2851	3254	3585	3857	4222				H12	-22.25	-10	134.25	409.25	705.25	1081.25	1528	1798.5	2151.5	2449.5	2681.5	3007.75	H12	62.74		0.994494																H12	0
Cycle Nr.	1	2	3	4	5	6	7	8	9	10	11	12		Corrected data		Cycle Nr.	1	2	3	4	5	6	7	8	9	10	11	12		Slope		R^		Plate 2														Time [s]	0
Time [s]	0	300	600	900	1200	1500.1	1800.1	2100.1	2400.1	2700.1	3000.1	3300.1				Time [s]	0	300	600	900	1200	1500	1800	2100.1	2400.1	2700.1	3000.1	3300.1							1	2	3	4	5	6	7	8	9	10	11	12		Temp. [°C]	25.4
Temp. [°C]	24.7	24.8	24.8	24.8	24.8	24.7	24.7	24.8	24.7	24.7	24.8	24.8				Time [min]	0	5	10	15	20	25	30	35.0017	40.0017	45.0017	50.0017	55.0017						A	76.5	75.1	63.42	41.72	19.54	2.72	-0.24	62.2	64.08	68.96	59	62.56		A1	148
A1	776	1015	1365	1769	2283	2695	3094	3525	3896	4187	4431	4715				A1	193.75	343	609.25	939.25	1377.25	1738.25	2094	2472.5	2793.5	3051.5	3255.5	3500.75	A1	76.5		0.993451		B	77.26	75.02	65.32	42.5	20.46	1.42	-1.12	49.52	63.38	61.9	62.82	65.66		A2	143
A2	769	949	1283	1685	2156	2604	3009	3423	3781	4074	4392	4568				A2	186.75	277	527.25	855.25	1250.25	1647.25	2009	2370.5	2678.5	2938.5	3216.5	3353.75	A2	75.1		0.998016		C	-13.52	-13.58	65.4	59.74	19.22	0.6	-0.68	-4.4	3.68	28.38	48.62	54.54		A3	147
A3	729	907	1179	1515	1915	2329	2716	3059	3430	3702	4021	4249				A3	146.75	235	423.25	685.25	1009.25	1372.25	1716	2006.5	2327.5	2566.5	2845.5	3034.75	A3	63.42		0.994901		D	-13.56	-13.58	70.38	63.9	23.16	1.3	0.24	-3.86	5.14	28.06	53.46	56.98		A4	142
A4	713	845	1057	1292	1558	1890	2182	2461	2784	3071	3342	3559				A4	130.75	173	301.25	462.25	652.25	933.25	1182	1408.5	1681.5	1935.5	2166.5	2344.75	A4	41.72		0.982869		E	-13.52	-13.62	80.16	70.32	56.78	13.02	2.36	8.82	21.38	64.1	64.08	64.38		A5	148
A5	704	802	937	1081	1243	1435	1620	1788	2022	2214	2466	2594				A5	121.75	130	181.25	251.25	337.25	478.25	620	735.5	919.5	1078.5	1290.5	1379.75	A5	19.54		0.972763		F	-13.52	-13.64	83.8	70.46	52.86	12.54	2.36	7.34	25.18	54.16	71.86	63.36		A6	141
A6	718	774	861	925	999	1108	1182	1282	1347	1457	1521	1666				A6	135.75	102	105.25	95.25	93.25	151.25	182	229.5	244.5	321.5	345.5	451.75	A6	2.72		0.886438		G	1.3	-0.14	64.72	39.74	21.22	9.98	-1.04	11.14	26.54	47.56	63.48	63.02		A7	137
A7	738	793	853	930	988	1056	1109	1190	1234	1308	1359	1424				A7	155.75	121	97.25	100.25	82.25	99.25	109	137.5	131.5	172.5	183.5	209.75	A7	-0.24		0.0338028		H	1.28	0.06	71.46	49.26	20.64	6.32	1.04	10.74	25.38	54.12	62.02	62.64		A8	-1
A8	714	819	1063	1383	1758	2201	2659	3024	3375	3716	4004	4376				A8	131.75	147	307.25	553.25	852.25	1244.25	1659	1971.5	2272.5	2580.5	2828.5	3161.75	A8	62.2		0.988939																A9	-1
A9	724	868	1108	1450	1850	2269	2720	3089	3442	3766	4017	4306				A9	141.75	196	352.25	620.25	944.25	1312.25	1720	2036.5	2339.5	2630.5	2841.5	3091.75	A9	64.08		0.995139																A10	-1
A10	733	864	1131	1560	1955	2375	2845	3248	3569	3948	4209	4472				A10	150.75	192	375.25	730.25	1049.25	1418.25	1845	2195.5	2466.5	2812.5	3033.5	3257.75	A10	68.96		0.999296																A11	-1
A11	755	880	1139	1466	1816	2232	2684	3052	3355	3745	4019	4231				A11	172.75	208	383.25	636.25	910.25	1275.25	1684	1999.5	2252.5	2609.5	2843.5	3016.75	A11	59		0.99229																A12	-1
A12	793	880	1100	1429	1828	2236	2648	3011	3410	3652	3936	4213				A12	210.75	208	344.25	599.25	922.25	1279.25	1648	1958.5	2307.5	2516.5	2760.5	2998.75	A12	62.56		0.994595		Slope	0.946107													B1	158
B1	793	1017	1369	1788	2262	2725	3187	3555	3907	4237	4507	4719				B1	210.75	345	613.25	958.25	1356.25	1768.25	2187	2502.5	2804.5	3101.5	3331.5	3504.75	B1	77.26		0.998397																B2	129
B2	802	939	1284	1681	2136	2609	3014	3474	3770	4116	4427	4656				B2	219.75	267	528.25	851.25	1230.25	1652.25	2014	2421.5	2667.5	2980.5	3251.5	3441.75	B2	75.02		0.996517																B3	142
B3	798	902	1204	1553	1985	2375	2799	3189	3506	3855	4136	4378				B3	215.75	230	448.25	723.25	1079.25	1418.25	1799	2136.5	2403.5	2719.5	2960.5	3163.75	B3	65.32		0.997188																B4	138
B4	703	839	1036	1278	1568	1874	2218	2512	2815	3107	3366	3595				B4	120.75	167	280.25	448.25	662.25	917.25	1218	1459.5	1712.5	1971.5	2190.5	2380.75	B4	42.5		0.991683																B5	130
B5	749	800	930	1071	1252	1437	1645	1843	2085	2293	2493	2705				B5	166.75	128	174.25	241.25	346.25	480.25	645	790.5	982.5	1157.5	1317.5	1490.75	B5	20.46		0.978929																B6	152
B6	672	765	849	917	992	1074	1176	1262	1347	1451	1552	1643				B6	89.75	93	93.25	87.25	86.25	117.25	176	209.5	244.5	315.5	376.5	428.75	B6	1.42		0.399604																B7	92
B7	699	758	845	907	978	1029	1099	1165	1210	1269	1336	1387				B7	116.75	86	89.25	77.25	72.25	72.25	99	112.5	107.5	133.5	160.5	172.75	B7	-1.12		0.812435																B8	-1
B8	726	807	989	1259	1573	1936	2315	2679	3052	3363	3702	3971				B8	143.75	135	233.25	429.25	667.25	979.25	1315	1626.5	1949.5	2227.5	2526.5	2756.75	B8	49.52		0.988981																B9	-1
B9	781	841	1101	1445	1825	2257	2669	3104	3411	3771	4043	4305				B9	198.75	169	345.25	615.25	919.25	1300.25	1669	2051.5	2308.5	2635.5	2867.5	3090.75	B9	63.38		0.993721																B10	-1
B10	772	832	1075	1396	1789	2202	2632	2942	3313	3683	3946	4203				B10	189.75	160	319.25	566.25	883.25	1245.25	1632	1889.5	2210.5	2547.5	2770.5	2988.75	B10	61.9		0.99308																B11	-1
B11	726	851	1109	1446	1849	2248	2709	3088	3389	3768	4047	4354				B11	143.75	179	353.25	616.25	943.25	1291.25	1709	2035.5	2286.5	2632.5	2871.5	3139.75	B11	62.82		0.996166																B12	-1
B12	774	882	1115	1451	1855	2301	2678	3097	3447	3781	4047	4294				B12	191.75	210	359.25	621.25	949.25	1344.25	1678	2044.5	2344.5	2645.5	2871.5	3079.75	B12	65.66		0.991861																C1	-1
C1	0	0	0	0	0	1	1	0	0	0	1	1				C1	-582.25	-672	-755.75	-829.75	-905.75	-955.75	-999	-1052.5	-1102.5	-1135.5	-1174.5	-1213.25	C1	-13.52		0.992046																C2	-1
C2	0	0	1	0	0	1	1	0	1	0	0	0				C2	-582.25	-672	-754.75	-829.75	-905.75	-955.75	-999	-1052.5	-1101.5	-1135.5	-1175.5	-1214.25	C2	-13.58		0.99171																C3	147
C3	753	908	1194	1525	1970	2362	2784	3166	3548	3808	4089	4373				C3	170.75	236	438.25	695.25	1064.25	1405.25	1784	2113.5	2445.5	2672.5	2913.5	3158.75	C3	65.4		0.994894																C4	147
C4	740	900	1175	1500	1884	2269	2693	3064	3398	3739	4033	4280				C4	157.75	228	419.25	670.25	978.25	1312.25	1693	2011.5	2295.5	2603.5	2857.5	3065.75	C4	59.74		0.996047																C5	151
C5	706	811	943	1092	1253	1436	1657	1848	2054	2257	2448	2662				C5	123.75	139	187.25	262.25	347.25	479.25	657	795.5	951.5	1121.5	1272.5	1447.75	C5	19.22		0.981284																C6	132
C6	714	773	849	914	999	1057	1144	1217	1278	1375	1441	1519				C6	131.75	101	93.25	84.25	93.25	100.25	144	164.5	175.5	239.5	265.5	304.75	C6	0.6		0.348837																C7	146
C7	700	789	873	934	997	1067	1136	1182	1237	1282	1329	1386				C7	117.75	117	117.25	104.25	91.25	110.25	136	129.5	134.5	146.5	153.5	171.75	C7	-0.68		0.158356																C8	-1
C8	689	762	843	890	941	979	1024	1047	1075	1111	1132	1151				C8	106.75	90	87.25	60.25	35.25	22.25	24	-5.5	-27.5	-24.5	-43.5	-63.25	C8	-4.4		0.978173																C9	-1
C9	712	813	896	970	1065	1152	1262	1333	1425	1526	1622	1712				C9	129.75	141	140.25	140.25	159.25	195.25	262	280.5	322.5	390.5	446.5	497.75	C9	3.68		0.839266																C10	-1
C10	712	815	956	1135	1361	1580	1853	2094	2314	2561	2782	2994				C10	129.75	143	200.25	305.25	455.25	623.25	853	1041.5	1211.5	1425.5	1606.5	1779.75	C10	28.38		0.989886																C11	-1
C11	741	865	1061	1327	1623	1999	2342	2669	2981	3273	3553	3832				C11	158.75	193	305.25	497.25	717.25	1042.25	1342	1616.5	1878.5	2137.5	2377.5	2617.75	C11	48.62		0.984282																C12	-1
C12	801	897	1107	1398	1753	2124	2538	2874	3216	3573	3854	4107				C12	218.75	225	351.25	568.25	847.25	1167.25	1538	1821.5	2113.5	2437.5	2678.5	2892.75	C12	54.54		0.992859																D1	-1
D1	0	0	1	0	1	1	1	1	0	1	1	0				D1	-582.25	-672	-754.75	-829.75	-904.75	-955.75	-999	-1051.5	-1102.5	-1134.5	-1174.5	-1214.25	D1	-13.56		0.992538																D2	-1
D2	0	1	1	1	1	1	0	0	1	1	0	1				D2	-582.25	-671	-754.75	-828.75	-904.75	-955.75	-1000	-1052.5	-1101.5	-1134.5	-1175.5	-1213.25	D2	-13.58		0.992735																D3	144
D3	803	894	1228	1606	2033	2485	2937	3326	3683	3971	4298	4500				D3	220.75	222	472.25	776.25	1127.25	1528.25	1937	2273.5	2580.5	2835.5	3122.5	3285.75	D3	70.38		0.996215																D4	144
D4	769	900	1152	1501	1886	2315	2663	3056	3358	3668	3997	4294				D4	186.75	228	396.25	671.25	980.25	1358.25	1663	2003.5	2255.5	2532.5	2821.5	3079.75	D4	63.9		0.994712																D5	122
D5	725	832	958	1113	1300	1508	1704	1942	2166	2352	2583	2772				D5	142.75	160	202.25	283.25	394.25	551.25	704	889.5	1063.5	1216.5	1407.5	1557.75	D5	23.16		0.978734																D6	152
D6	733	789	876	943	1030	1095	1168	1258	1318	1404	1469	1558				D6	150.75	117	120.25	113.25	124.25	138.25	168	205.5	215.5	268.5	293.5	343.75	D6	1.3		0.634861																D7	140
D7	725	800	877	956	1020	1086	1150	1204	1259	1316	1362	1402				D7	142.75	128	121.25	126.25	114.25	129.25	150	151.5	156.5	180.5	186.5	187.75	D7	0.24		0.055814																D8	-1
D8	713	778	840	891	936	987	1017	1046	1084	1116	1132	1155				D8	130.75	106	84.25	61.25	30.25	30.25	17	-6.5	-18.5	-19.5	-43.5	-59.25	D8	-3.86		0.899408																D9	-1
D9	767	785	876	973	1045	1164	1258	1347	1457	1528	1633	1710				D9	184.75	113	120.25	143.25	139.25	207.25	258	294.5	354.5	392.5	457.5	495.75	D9	5.14		0.768235																D10	-1
D10	711	807	961	1134	1347	1584	1817	2082	2314	2568	2801	3016				D10	128.75	135	205.25	304.25	441.25	627.25	817	1029.5	1211.5	1432.5	1625.5	1801.75	D10	28.06		0.981077																D11	-1
D11	745	875	1093	1374	1720	2095	2468	2805	3164	3417	3722	4039				D11	162.75	203	337.25	544.25	814.25	1138.25	1468	1752.5	2061.5	2281.5	2546.5	2824.75	D11	53.46		0.9905																D12	-1
D12	803	887	1135	1408	1777	2188	2567	2939	3267	3617	3848	4148				D12	220.75	215	379.25	578.25	871.25	1231.25	1567	1886.5	2164.5	2481.5	2672.5	2933.75	D12	56.98		0.984196																E1	-1
E1	-1	0	0	0	0	1	0	0	1	0	0	0				E1	-583.25	-672	-755.75	-829.75	-905.75	-955.75	-1000	-1052.5	-1101.5	-1135.5	-1175.5	-1214.25	E1	-13.52		0.992046																E2	-1
E2	0	1	1	0	1	0	1	1	0	0	1	1				E2	-582.25	-671	-754.75	-829.75	-904.75	-956.75	-999	-1051.5	-1102.5	-1135.5	-1174.5	-1213.25	E2	-13.62		0.993202																E3	154
E3	775	1074	1485	1935	2434	2881	3338	3699	4109	4375	4669	4895				E3	192.75	402	729.25	1105.25	1528.25	1924.25	2338	2646.5	3006.5	3239.5	3493.5	3680.75	E3	80.16		0.999535																E4	147
E4	743	948	1224	1603	2039	2477	2918	3287	3692	3861	4282	4508				E4	160.75	276	468.25	773.25	1133.25	1520.25	1918	2234.5	2589.5	2725.5	3106.5	3293.75	E4	70.32		0.997225																E5	153
E5	733	924	1185	1514	1873	2238	2643	3007	3305	3691	3926	4188				E5	150.75	252	429.25	684.25	967.25	1281.25	1643	1954.5	2202.5	2555.5	2750.5	2973.75	E5	56.78		0.997844																E6	145
E6	730	816	934	1045	1205	1324	1492	1646	1807	1950	2078	2254				E6	147.75	144	178.25	215.25	299.25	367.25	492	593.5	704.5	814.5	902.5	1039.75	E6	13.02		0.979717																E7	152
E7	734	816	903	985	1065	1142	1215	1274	1356	1432	1497	1552				E7	151.75	144	147.25	155.25	159.25	185.25	215	221.5	253.5	296.5	321.5	337.75	E7	2.36		0.858446																E8	-1
E8	740	835	946	1056	1168	1282	1398	1499	1605	1735	1827	1939				E8	157.75	163	190.25	226.25	262.25	325.25	398	446.5	502.5	599.5	651.5	724.75	E8	8.82		0.978004																E9	-1
E9	732	840	962	1104	1283	1485	1692	1891	2099	2301	2501	2682				E9	149.75	168	206.25	274.25	377.25	528.25	692	838.5	996.5	1165.5	1325.5	1467.75	E9	21.38		0.970601																E10	-1
E10	766	872	1126	1469	1852	2293	2710	3089	3421	3743	3997	4280				E10	183.75	200	370.25	639.25	946.25	1336.25	1710	2036.5	2318.5	2607.5	2821.5	3065.75	E10	64.1		0.992729																E11	-1
E11	752	915	1145	1495	1868	2315	2749	3116	3488	3795	4118	4360				E11	169.75	243	389.25	665.25	962.25	1358.25	1749	2063.5	2385.5	2659.5	2942.5	3145.75	E11	64.08		0.992451																E12	-1
E12	784	923	1167	1491	1903	2329	2718	3170	3511	3866	4210	4476				E12	201.75	251	411.25	661.25	997.25	1372.25	1718	2117.5	2408.5	2730.5	3034.5	3261.75	E12	64.38		0.992307																F1	-1
F1	0	1	0	1	1	1	1	1	0	0	0	1				F1	-582.25	-671	-755.75	-828.75	-904.75	-955.75	-999	-1051.5	-1102.5	-1135.5	-1175.5	-1213.25	F1	-13.52		0.993038																F2	-1
F2	-1	0	1	1	1	0	0	1	1	0	1	0				F2	-583.25	-672	-754.75	-828.75	-904.75	-956.75	-1000	-1051.5	-1101.5	-1135.5	-1174.5	-1214.25	F2	-13.64		0.993388																F3	155
F3	783	1101	1504	1991	2504	2956	3415	3826	4171	4459	4732	4901				F3	200.75	429	748.25	1161.25	1598.25	1999.25	2415	2773.5	3068.5	3323.5	3556.5	3686.75	F3	83.8		0.999754																F4	157
F4	772	918	1207	1595	2035	2461	2897	3297	3641	3942	4234	4469				F4	189.75	246	451.25	765.25	1129.25	1504.25	1897	2244.5	2538.5	2806.5	3058.5	3254.75	F4	70.46		0.998381																F5	113
F5	733	919	1199	1479	1831	2189	2610	2949	3293	3610	3900	4086				F5	150.75	247	443.25	649.25	925.25	1232.25	1610	1896.5	2190.5	2474.5	2724.5	2871.75	F5	52.86		0.992537																F6	150
F6	714	823	936	1056	1174	1332	1475	1631	1777	1932	2081	2231				F6	131.75	151	180.25	226.25	268.25	375.25	475	578.5	674.5	796.5	905.5	1016.75	F6	12.54		0.943898																F7	153
F7	732	836	913	1008	1073	1157	1226	1289	1384	1421	1503	1547				F7	149.75	164	157.25	178.25	167.25	200.25	226	236.5	281.5	285.5	327.5	332.75	F7	2.36		0.681881																F8	-1
F8	729	826	942	1053	1157	1256	1384	1492	1601	1724	1820	1927				F8	146.75	154	186.25	223.25	251.25	299.25	384	439.5	498.5	588.5	644.5	712.75	F8	7.34		0.989378																F9	-2
F9	769	839	959	1146	1335	1542	1787	2007	2237	2465	2695	2872				F9	186.75	167	203.25	316.25	429.25	585.25	787	954.5	1134.5	1329.5	1519.5	1657.75	F9	25.18		0.99305																F10	-1
F10	828	862	1071	1373	1712	2087	2486	2846	3147	3475	3744	3965				F10	245.75	190	315.25	543.25	806.25	1130.25	1486	1793.5	2044.5	2339.5	2568.5	2750.75	F10	54.16		0.993665																F11	-1
F11	750	899	1183	1554	2001	2458	2920	3343	3705	4058	4327	4577				F11	167.75	227	427.25	724.25	1095.25	1501.25	1920	2290.5	2602.5	2922.5	3151.5	3362.75	F11	71.86		0.995303																F12	-1
F12	859	934	1177	1517	1908	2329	2759	3168	3488	3814	4139	4425				F12	276.75	262	421.25	687.25	1002.25	1372.25	1759	2115.5	2385.5	2678.5	2963.5	3210.75	F12	63.36		0.994637																G1	180
G1	816	938	1028	1104	1176	1252	1290	1362	1402	1460	1510	1554				G1	233.75	266	272.25	274.25	270.25	295.25	290	309.5	299.5	324.5	334.5	339.75	G1	1.3		0.521927																G2	159
G2	764	863	954	1017	1104	1149	1201	1260	1314	1334	1380	1428				G2	181.75	191	198.25	187.25	198.25	192.25	201	207.5	211.5	198.5	204.5	213.75	G2	-0.14		0.0289086																G3	157
G3	753	922	1213	1570	1960	2388	2803	3190	3515	3866	4170	4394				G3	170.75	250	457.25	740.25	1054.25	1431.25	1803	2137.5	2412.5	2730.5	2994.5	3179.75	G3	64.72		0.995702																G4	155
G4	775	863	1025	1265	1522	1828	2119	2452	2741	2988	3300	3501				G4	192.75	191	269.25	435.25	616.25	871.25	1119	1399.5	1638.5	1852.5	2124.5	2286.75	G4	39.74		0.989205																G5	162
G5	747	867	981	1118	1307	1498	1715	1940	2161	2403	2633	2832				G5	164.75	195	225.25	288.25	401.25	541.25	715	887.5	1058.5	1267.5	1457.5	1617.75	G5	21.22		0.973896																G6	151
G6	730	857	952	1065	1181	1306	1419	1526	1638	1763	1844	1938				G6	147.75	185	196.25	235.25	275.25	349.25	419	473.5	535.5	627.5	668.5	723.75	G6	9.98		0.971844																G7	155
G7	747	826	912	989	1052	1100	1154	1227	1279	1303	1362	1404				G7	164.75	154	156.25	159.25	146.25	143.25	154	174.5	176.5	167.5	186.5	189.75	G7	-1.04		0.759551																G8	-1
G8	766	831	956	1063	1192	1325	1432	1580	1705	1819	1971	2132				G8	183.75	159	200.25	233.25	286.25	368.25	432	527.5	602.5	683.5	795.5	917.75	G8	11.14		0.962505																G9	-1
G9	754	845	994	1175	1363	1600	1847	2075	2318	2578	2780	3025				G9	171.75	173	238.25	345.25	457.25	643.25	847	1022.5	1215.5	1442.5	1604.5	1810.75	G9	26.54		0.979984																G10	-1
G10	802	857	1053	1313	1619	1970	2318	2677	2985	3307	3598	3899				G10	219.75	185	297.25	483.25	713.25	1013.25	1318	1624.5	1882.5	2171.5	2422.5	2684.75	G10	47.56		0.988523																G11	-1
G11	769	915	1161	1496	1893	2313	2741	3075	3472	3853	4145	4409				G11	186.75	243	405.25	666.25	987.25	1356.25	1741	2022.5	2369.5	2717.5	2969.5	3194.75	G11	63.48		0.99423																G12	-1
G12	800	928	1181	1495	1893	2325	2747	3195	3516	3891	4207	4413				G12	217.75	256	425.25	665.25	987.25	1368.25	1747	2142.5	2413.5	2755.5	3031.5	3198.75	G12	63.02		0.990035																H1	172
H1	838	927	1023	1098	1175	1245	1310	1348	1391	1456	1517	1533				H1	255.75	255	267.25	268.25	269.25	288.25	310	295.5	288.5	320.5	341.5	318.75	H1	1.28		0.678146																H2	164
H2	823	882	970	1042	1100	1178	1223	1271	1293	1363	1420	1462				H2	240.75	210	214.25	212.25	194.25	221.25	223	218.5	190.5	227.5	244.5	247.75	H2	0.06		0.00113422																H3	160
H3	778	979	1300	1674	2122	2568	3022	3394	3741	4131	4391	4659				H3	195.75	307	544.25	844.25	1216.25	1611.25	2022	2341.5	2638.5	2995.5	3215.5	3444.75	H3	71.46		0.996291																H4	163
H4	774	941	1150	1431	1756	2089	2454	2807	3155	3436	3750	4010				H4	191.75	269	394.25	601.25	850.25	1132.25	1454	1754.5	2052.5	2300.5	2574.5	2795.75	H4	49.26		0.995372																H5	141
H5	794	880	1026	1149	1327	1537	1722	1938	2202	2419	2641	2837				H5	211.75	208	270.25	319.25	421.25	580.25	722	885.5	1099.5	1283.5	1465.5	1622.75	H5	20.64		0.946234																H6	74
H6	775	862	946	1051	1155	1243	1363	1452	1552	1657	1748	1866				H6	192.75	190	190.25	221.25	249.25	286.25	363	399.5	449.5	521.5	572.5	651.75	H6	6.32		0.996766																H7	162
H7	774	880	949	1026	1106	1166	1223	1289	1327	1370	1437	1488				H7	191.75	208	193.25	196.25	200.25	209.25	223	236.5	224.5	234.5	261.5	273.75	H7	1.04		0.932414																H8	-1
H8	774	896	1013	1116	1237	1378	1510	1650	1777	1906	2048	2191				H8	191.75	224	257.25	286.25	331.25	421.25	510	597.5	674.5	770.5	872.5	976.75	H8	10.74		0.936826																H9	-1
H9	812	903	1059	1220	1416	1643	1827	2057	2271	2505	2679	2874				H9	229.75	231	303.25	390.25	510.25	686.25	827	1004.5	1168.5	1369.5	1503.5	1659.75	H9	25.38		0.975684																H10	-1
H10	859	917	1151	1450	1787	2167	2530	2923	3194	3509	3873	4077				H10	276.75	245	395.25	620.25	881.25	1210.25	1530	1870.5	2091.5	2373.5	2697.5	2862.75	H10	54.12		0.992531																H11	-1
H11	796	939	1173	1512	1908	2301	2709	3062	3476	3769	4095	4389				H11	213.75	267	417.25	682.25	1002.25	1344.25	1709	2009.5	2373.5	2633.5	2919.5	3174.75	H11	62.02		0.996814																H12	-1
H12	858	950	1208	1523	1938	2340	2775	3212	3509	3886	4146	4401				H12	275.75	278	452.25	693.25	1032.25	1383.25	1775	2159.5	2406.5	2750.5	2970.5	3186.75	H12	62.64		0.993126
[truncated: 82 more columns]

## Sheet: Figure 3a
Mouse brain lysate
100mg brain/ml	1nM = 1pmol/ml = 1pmol/100mg
2-Arachidonyl-glycerol
slope	0.00243412
	Name	Sample Text	Quan Trace	RT	Area	IS Area	Response	Type	Std. Conc	%Dev	nM	Vial	Acq.Date	Acq.Time	2-AG (nM)
1	2021002007740_MAGL_Incubation_Brain_MH_001	Solvent (MeOH) dbl blank	379.24 > 287.21					Solvent				2:H,12	2021-03-24	11:22:50	0
2	2021002007740_MAGL_Incubation_Brain_MH_002	Blank	379.24 > 287.21	3.87	24383	107567	0.227	Blank				2:A,1	2021-03-24	11:30:34	93.2575
3	2021002007740_MAGL_Incubation_Brain_MH_003	Standard 9	379.24 > 287.21	3.87	67008	133728	0.501	Standard	97.656	-45.4	53.318	2:A,2	2021-03-24	11:38:16	205.824
4	2021002007740_MAGL_Incubation_Brain_MH_004	Standard 8	379.24 > 287.21	3.87	75564	96930	0.78	Standard	195.313	-14.1	167.728	2:A,3	2021-03-24	11:45:57	320.444
5	2021002007740_MAGL_Incubation_Brain_MH_005	Standard 7	379.24 > 287.21	3.87	102970	77528	1.328	Standard	390.625	0.6	393.108	2:A,4	2021-03-24	11:53:38	545.577
6	2021002007740_MAGL_Incubation_Brain_MH_006	Standard 6	379.24 > 287.21	3.87	187078	65403	2.86	Standard	781.25	30.9	1022.57	2:A,5	2021-03-24	12:01:19	1174.96
7	2021002007740_MAGL_Incubation_Brain_MH_007	Standard 5	379.24 > 287.21	3.87	446383	94992	4.699	Standard	1562.5	13.8	1778.01	2:A,6	2021-03-24	12:09:01	1930.47
8	2021002007740_MAGL_Incubation_Brain_MH_008	Standard 4	379.24 > 287.21	3.87	690848	96294	7.174	Standard	3125	-10.6	2794.89	2:A,7	2021-03-24	12:16:43	2947.27
9	2021002007740_MAGL_Incubation_Brain_MH_009	Standard 3	379.24 > 287.21	3.87	1341732	85651	15.665	Standard	6250	0.5	6283.12	2:A,8	2021-03-24	12:24:24	6435.59
10	2021002007740_MAGL_Incubation_Brain_MH_010	Standard 2	379.24 > 287.21	3.87	2928499	78721	37.201	Standard	12500	21	15130.6	2:A,9	2021-03-24	12:32:05	15283.1
11	2021002007740_MAGL_Incubation_Brain_MH_011	Standard 1	379.24 > 287.21	3.87	3775263	66923	56.412	Standard	25000	-7.9	23023.1	2:A,10	2021-03-24	12:39:47	23175.5
12	2021002007740_MAGL_Incubation_Brain_MH_012	Solvent (MeOH) dbl blank	379.24 > 287.21	3.87	1276			Solvent				2:H,12	2021-03-24	12:47:29	0
13	2021002007740_MAGL_Incubation_Brain_MH_013	Solvent (MeOH) dbl blank	379.24 > 287.21	3.87	463			Solvent				2:H,12	2021-03-24	12:55:11	0
14	2021002007740_MAGL_Incubation_Brain_MH_014	Sample 1	379.24 > 287.21	3.87	27454	108573	0.253	Analyte				2:B,1	2021-03-24	13:02:53	103.939
15	2021002007740_MAGL_Incubation_Brain_MH_015	Sample 2	379.24 > 287.21	3.87	30056	114519	0.262	Analyte				2:B,2	2021-03-24	13:10:34	107.636
16	2021002007740_MAGL_Incubation_Brain_MH_016	Sample 3	379.24 > 287.21	3.87	22054	88539	0.249	Analyte				2:B,3	2021-03-24	13:18:15	102.296
17	2021002007740_MAGL_Incubation_Brain_MH_017	Sample 4	379.24 > 287.21	3.87	21263	93706	0.227	Analyte				2:B,4	2021-03-24	13:25:57	93.2575
18	2021002007740_MAGL_Incubation_Brain_MH_018	Sample 5	379.24 > 287.21	3.87	24036	90091	0.267	Analyte				2:B,5	2021-03-24	13:33:38	109.691
19	2021002007740_MAGL_Incubation_Brain_MH_019	Sample 6	379.24 > 287.21	3.95	18758	79614	0.236	Analyte				2:B,6	2021-03-24	13:41:20	96.955
20	2021002007740_MAGL_Incubation_Brain_MH_020	Sample 7	379.24 > 287.21	3.95	19574	80641	0.243	Analyte				2:B,7	2021-03-24	13:49:02	99.8307
21	2021002007740_MAGL_Incubation_Brain_MH_021	Sample 8	379.24 > 287.21	3.95	20190	77548	0.26	Analyte				2:B,8	2021-03-24	13:56:43	106.815
22	2021002007740_MAGL_Incubation_Brain_MH_022	Sample 9	379.24 > 287.21	3.95	22384	78515	0.285	Analyte				2:B,9	2021-03-24	14:04:25	117.085
23	2021002007740_MAGL_Incubation_Brain_MH_023	Sample 10	379.24 > 287.21	3.95	23255	75975	0.306	Analyte				2:B,10	2021-03-24	14:12:07	125.713
24	2021002007740_MAGL_Incubation_Brain_MH_024	Sample 11	379.24 > 287.21	3.95	24756	79232	0.312	Analyte				2:B,11	2021-03-24	14:19:49	128.178
25	2021002007740_MAGL_Incubation_Brain_MH_025	Sample 12	379.24 > 287.21	3.95	23027	74264	0.31	Analyte				2:B,12	2021-03-24	14:27:30	127.356
26	2021002007740_MAGL_Incubation_Brain_MH_026	Sample 13	379.24 > 287.21	3.95	85447	79175	1.079	Analyte			290.831	2:C,1	2021-03-24	14:35:12	443.281
27	2021002007740_MAGL_Incubation_Brain_MH_027	Sample 14	379.24 > 287.21	3.95	81722	77492	1.055	Analyte			280.711	2:C,2	2021-03-24	14:42:53	433.422
28	2021002007740_MAGL_Incubation_Brain_MH_028	Sample 15	379.24 > 287.21	3.95	84464	82311	1.026	Analyte			269.037	2:C,3	2021-03-24	14:50:35	421.508
29	2021002007740_MAGL_Incubation_Brain_MH_029	Sample 16	379.24 > 287.21	3.95	338516	74872	4.521	Analyte			1704.92	2:C,4	2021-03-24	14:58:16	1857.34
30	2021002007740_MAGL_Incubation_Brain_MH_030	Sample 17	379.24 > 287.21	3.95	293667	72605	4.045	Analyte			1509.15	2:C,5	2021-03-24	15:05:57	1661.79
31	2021002007740_MAGL_Incubation_Brain_MH_031	Sample 18	379.24 > 287.21	3.95	351910	74013	4.755	Analyte			1800.83	2:C,6	2021-03-24	15:13:39	1953.48
32	2021002007740_MAGL_Incubation_Brain_MH_032	Sample 19	379.24 > 287.21	3.95	410133	74131	5.533	Analyte			2120.39	2:C,7	2021-03-24	15:21:21	2273.1
33	2021002007740_MAGL_Incubation_Brain_MH_033	Sample 20	379.24 > 287.21	3.95	430238	75910	5.668	Analyte			2175.92	2:C,8	2021-03-24	15:29:03	2328.56
34	2021002007740_MAGL_Incubation_Brain_MH_034	Sample 21	379.24 > 287.21	3.95	448789	79567	5.64	Analyte			2164.67	2:C,9	2021-03-24	15:36:43	2317.06
35	2021002007740_MAGL_Incubation_Brain_MH_035	Sample 22	379.24 > 287.21	3.95	385505	75742	5.09	Analyte			1938.44	2:C,10	2021-03-24	15:44:25	2091.1
36	2021002007740_MAGL_Incubation_Brain_MH_036	Sample 23	379.24 > 287.21	3.95	416071	76738	5.422	Analyte			2074.95	2:C,11	2021-03-24	15:52:08	2227.5
37	2021002007740_MAGL_Incubation_Brain_MH_037	Sample 24	379.24 > 287.21	3.95	396420	78831	5.029	Analyte			1913.41	2:C,12	2021-03-24	15:59:48	2066.04
38	2021002007740_MAGL_Incubation_Brain_MH_038	Solvent (MeOH) dbl blank	379.24 > 287.21					Solvent				2:H,12	2021-03-24	16:07:29
Human brain lysate
100mg brain/ml	1nM = 1pmol/ml = 1pmol/100mg
slope	0.00242243
	Name	Sample Text	Quan Trace	RT	Area	IS Area	Response	Type	Std. Conc	%Dev	nM	Vial	Acq.Date	Acq.Time	2-AG (nM)
1	2021002007740_MAGL_Incubation_Brain_MH_038	Solvent (MeOH) dbl blank	379.24 > 287.21					Solvent				2:H,12	44279	0.671863	0
2	2021002007740_MAGL_Incubation_Brain_MH_039	Blank	379.24 > 287.21	3.95	15061	84419	0.178	Blank				2:D,1	44279	0.677199	73.4799
3	2021002007740_MAGL_Incubation_Brain_MH_040	Standard 9	379.24 > 287.21	3.87	50298	101896	0.494	Standard	97.656	-20.9	77.285	2:D,2	44279	0.682535	203.927
4	2021002007740_MAGL_Incubation_Brain_MH_041	Standard 8	379.24 > 287.21	3.95	65769	85992	0.765	Standard	195.313	-3.1	189.243	2:D,3	44279	0.68787	315.799
5	2021002007740_MAGL_Incubation_Brain_MH_042	Standard 7	379.24 > 287.21	3.95	112164	85813	1.307	Standard	390.625	5.8	413.091	2:D,4	44279	0.693218	539.541
6	2021002007740_MAGL_Incubation_Brain_MH_043	Standard 6	379.24 > 287.21	3.95	204728	86519	2.366	Standard	781.25	8.8	850.338	2:D,5	44279	0.698565	976.705
7	2021002007740_MAGL_Incubation_Brain_MH_044	Standard 5	379.24 > 287.21	3.95	398974	94915	4.203	Standard	1562.5	3	1608.75	2:D,6	44279	0.703924	1735.03
8	2021002007740_MAGL_Incubation_Brain_MH_045	Standard 4	379.24 > 287.21	3.95	627842	80329	7.816	Standard	3125	-0.8	3099.96	2:D,7	44279	0.709271	3226.51
9	2021002007740_MAGL_Incubation_Brain_MH_046	Standard 3	379.24 > 287.21	3.95	1244177	81519	15.262	Standard	6250	-1.2	6173.99	2:D,8	44279	0.714606	6300.29
10	2021002007740_MAGL_Incubation_Brain_MH_047	Standard 2	379.24 > 287.21	3.95	3160203	75825	41.678	Standard	12500	36.6	17078.5	2:D,9	44279	0.719965	17205
11	2021002007740_MAGL_Incubation_Brain_MH_048	Standard 1	379.24 > 287.21	3.95	3758907	73581	51.085	Standard	25000	-16.2	20961.9	2:D,10	44279	0.725289	21088.3
12	2021002007740_MAGL_Incubation_Brain_MH_049	Solvent (MeOH) dbl blank	379.24 > 287.21	3.94	1261			Solvent				2:H,12	44279	0.730648	0
13	2021002007740_MAGL_Incubation_Brain_MH_050	Solvent (MeOH) dbl blank	379.24 > 287.21	3.86	341			Solvent				2:H,12	44279	0.735995	0
14	2021002007740_MAGL_Incubation_Brain_MH_051	Sample 25	379.24 > 287.21	3.95	14315	115243	0.124	Analyte				2:E,1	44279	0.741343	51.1883
15	2021002007740_MAGL_Incubation_Brain_MH_052	Sample 26	379.24 > 287.21	3.95	14531	118599	0.123	Analyte				2:E,2	44279	0.746678	50.7755
16	2021002007740_MAGL_Incubation_Brain_MH_053	Sample 27	379.24 > 287.21	3.95	11203	93360	0.12	Analyte				2:E,3	44279	0.752014	49.537
17	2021002007740_MAGL_Incubation_Brain_MH_054	Sample 28	379.24 > 287.21	3.95	10910	86027	0.127	Analyte				2:E,4	44279	0.757361	52.4267
18	2021002007740_MAGL_Incubation_Brain_MH_055	Sample 29	379.24 > 287.21	3.95	12497	90027	0.139	Analyte				2:E,5	44279	0.762685	57.3804
19	2021002007740_MAGL_Incubation_Brain_MH_056	Sample 30	379.24 > 287.21	3.95	11076	84787	0.131	Analyte				2:E,6	44279	0.768021	54.0779
20	2021002007740_MAGL_Incubation_Brain_MH_057	Sample 31	379.24 > 287.21	3.95	11461	84405	0.136	Analyte				2:E,7	44279	0.773368	56.142
21	2021002007740_MAGL_Incubation_Brain_MH_058	Sample 32	379.24 > 287.21	3.95	11061	80089	0.138	Analyte				2:E,8	44279	0.778704	56.9676
22	2021002007740_MAGL_Incubation_Brain_MH_059	Sample 33	379.24 > 287.21	3.95	10737	78985	0.136	Analyte				2:E,9	44279	0.784039	56.142
23	2021002007740_MAGL_Incubation_Brain_MH_060	Sample 34	379.24 > 287.21	3.95	15063	85803	0.176	Analyte				2:E,10	44279	0.789387	72.6543
24	2021002007740_MAGL_Incubation_Brain_MH_061	Sample 35	379.24 > 287.21	3.95	14848	81497	0.182	Analyte				2:E,11	44279	0.794722	75.1312
25	2021002007740_MAGL_Incubation_Brain_MH_062	Sample 36	379.24 > 287.21	3.95	14176	83828	0.169	Analyte				2:E,12	44279	0.800069	69.7647
26	2021002007740_MAGL_Incubation_Brain_MH_063	Sample 37	379.24 > 287.21	3.95	72782	84270	0.864	Analyte			230.049	2:F,1	44279	0.805405	356.667
27	2021002007740_MAGL_Incubation_Brain_MH_064	Sample 38	379.24 > 287.21	3.95	73870	81156	0.91	Analyte			249.26	2:F,2	44279	0.810741	375.656
28	2021002007740_MAGL_Incubation_Brain_MH_065	Sample 39	379.24 > 287.21	3.95	66255	79693	0.831	Analyte			216.713	2:F,3	44279	0.816076	343.044
29	2021002007740_MAGL_Incubation_Brain_MH_066	Sample 40	379.24 > 287.21	3.95	195755	80526	2.431	Analyte			877.034	2:F,4	44279	0.821424	1003.54
30	2021002007740_MAGL_Incubation_Brain_MH_067	Sample 41	379.24 > 287.21	3.95	217889	82221	2.65	Analyte			967.473	2:F,5	44279	0.826759	1093.94
31	2021002007740_MAGL_Incubation_Brain_MH_068	Sample 42	379.24 > 287.21	3.95	175608	71716	2.449	Analyte			884.348	2:F,6	44279	0.832106	1010.97
32	2021002007740_MAGL_Incubation_Brain_MH_069	Sample 43	379.24 > 287.21	3.95	234513	79787	2.939	Analyte			1086.86	2:F,7	44279	0.837454	1213.24
33	2021002007740_MAGL_Incubation_Brain_MH_070	Sample 44	379.24 > 287.21	3.95	229609	84384	2.721	Analyte			996.768	2:F,8	44279	0.842789	1123.25
34	2021002007740_MAGL_Incubation_Brain_MH_071	Sample 45	379.24 > 287.21	3.95	222328	83067	2.676	Analyte			978.398	2:F,9	44279	0.848137	1104.68
35	2021002007740_MAGL_Incubation_Brain_MH_072	Sample 46	379.24 > 287.21	3.95	167183	77759	2.15	Analyte			761.064	2:F,10	44279	0.853472	887.539
36	2021002007740_MAGL_Incubation_Brain_MH_073	Sample 47	379.24 > 287.21	3.95	162280	84692	1.916	Analyte			664.505	2:F,11	44279	0.858819	790.941
37	2021002007740_MAGL_Incubation_Brain_MH_074	Sample 48	379.24 > 287.21	3.95	155194	81737	1.899	Analyte			657.32	2:F,12	44279	0.864155	783.924
38	2021002007740_MAGL_Incubation_Brain_MH_075	Solvent (MeOH) dbl blank	379.24 > 287.21					Solvent				2:H,12	44279	0.869502	0

## Sheet: Figure 3a simplified
		2-AG (pmol/mg brain)
	LEI-515 [uM]	Human brain lysate			Mouse brain lysate
	DMSO	0.512	0.508	0.495	1.039	1.076	1.023
	0.0001	0.524	0.574	0.541	0.933	1.097	0.97
	0.001	0.561	0.57	0.561	0.998	1.068	1.171
	0.01	0.727	0.751	0.698	1.257	1.282	1.274
	0.1	3.567	3.757	3.43	4.433	4.334	4.215
	1	10.035	10.939	10.11	18.573	16.618	19.535
	10	12.132	11.233	11.047	22.731	23.286	23.171
	100	8.875	7.909	7.839	20.911	22.275	20.66

## Sheet: Figure 3b
			Gel 1																Gel 2																	Gel 2
Lane	1	2	3	4	5	6	7	8	9	10	11	12	13	14	15	Lane	1	2	3	4	5	6	7	8	9	10	11	12	13	14	15		Lane	1	2	3	4	5	6	7	8	9	10	11	12	13	14	15
Compound	DMSO					LEI-515					ABX-1431					Compound	DMSO					LEI-515					ABX-1431						Compound	DMSO					LEI-515					ABX-1431

## Sheet: Figure 3c
Lane	1	2	3	4	5	6	7	8	9	10	11	12	13				Lane	1	2	3	4	5	6	7	8	9	10	11	12	13
Lysate & probe	Mouse brain membrane & FP-TAMRA																Lysate & probe	Mouse brain membrane & MB064
Compound	DMSO	LEI-515					ABX	DMSO	LEI-515								Compound	DMSO	LEI-515					ABX	DMSO	LEI-515
Concentration		1 nM	10 nM	0.1 µM	1 µM	10 µM	10 µM		1 nM	10 nM	0.1 µM	1 µM	10µM				Concentration		1 nM	10 nM	0.1 µM	1 µM	10 µM	10 µM		1 nM	10 nM	0.1 µM	1 µM	10µM

## Sheet: Figure 3d
Protein IDs	Majority protein IDs	Peptide counts (all)	Peptide counts (razor+unique)	Peptide counts (unique)	Protein names	Gene names	Fasta headers	Number of proteins	Peptides	Razor + unique peptides	Unique peptides	Peptides DMSO_1	Peptides DMSO_2	Peptides DMSO_3	Peptides DMSO_4	Peptides DMSO_HI_1	Peptides DMSO_HI_2	Peptides DMSO_HI_3	Peptides DMSO_HI_4	Peptides LEI515_1	Peptides LEI515_2	Peptides LEI515_3	Peptides LEI515_4	Razor + unique peptides DMSO_1	Razor + unique peptides DMSO_2	Razor + unique peptides DMSO_3	Razor + unique peptides DMSO_4	Razor + unique peptides DMSO_HI_1	Razor + unique peptides DMSO_HI_2	Razor + unique peptides DMSO_HI_3	Razor + unique peptides DMSO_HI_4	Razor + unique peptides LEI515_1	Razor + unique peptides LEI515_2	Razor + unique peptides LEI515_3	Razor + unique peptides LEI515_4	Unique peptides DMSO_1	Unique peptides DMSO_2	Unique peptides DMSO_3	Unique peptides DMSO_4	Unique peptides DMSO_HI_1	Unique peptides DMSO_HI_2	Unique peptides DMSO_HI_3	Unique peptides DMSO_HI_4	Unique peptides LEI515_1	Unique peptides LEI515_2	Unique peptides LEI515_3	Unique peptides LEI515_4	Sequence coverage [%]	Unique + razor sequence coverage [%]
Q8K4F5	Q8K4F5	7	7	7	Alpha/beta hydrolase domain-containing protein 11	Abhd11	sp|Q8K4F5|ABHDB_MOUSE Protein ABHD11 OS=Mus musculus OX=10090 GN=Abhd11 PE=1 SV=1	1	7	7	7	7	7	7	7	0	0	0	0	0	7	5	6	7	7	7	7	0	0	0	0	0	7	5	6	7	7	7	7	0	0	0	0	0	7	5	6	35.2	35.2
Q8VCR7	Q8VCR7	4	4	4	Alpha/beta hydrolase domain-containing protein 14B	Abhd14b	sp|Q8VCR7|ABHEB_MOUSE Protein ABHD14B OS=Mus musculus OX=10090 GN=Abhd14b PE=1 SV=1	1	4	4	4	4	4	4	4	0	0	0	0	0	4	4	4	4	4	4	4	0	0	0	0	0	4	4	4	4	4	4	4	0	0	0	0	0	4	4	4	25.2	25.2
P45952	P45952	4	4	4	Medium-chain specific acyl-CoA dehydrogenase, mitochondrial	Acadm	sp|P45952|ACADM_MOUSE Medium-chain specific acyl-CoA dehydrogenase, mitochondrial OS=Mus musculus OX=10090 GN=Acadm PE=1 SV=1	1	4	4	4	4	4	4	3	2	2	1	2	1	4	4	4	4	4	4	3	2	2	1	2	1	4	4	4	4	4	4	3	2	2	1	2	1	4	4	4	12.4	12.4
P21836	P21836	2	2	2	Acetylcholinesterase	Ache	sp|P21836|ACES_MOUSE Acetylcholinesterase OS=Mus musculus OX=10090 GN=Ache PE=1 SV=1	1	2	2	2	2	2	2	2	0	0	0	0	0	2	1	2	2	2	2	2	0	0	0	0	0	2	1	2	2	2	2	2	0	0	0	0	0	2	1	2	5.2	5.2
Q9QYR9;O55137;Q9QYR7;Q8BWN8;Q6Q2Z6;Q32Q92	Q9QYR9	3;1;1;1;1;1	3;1;1;1;1;1	3;1;1;1;1;1	Acyl-coenzyme A thioesterase 2, mitochondrial	Acot2	sp|Q9QYR9|ACOT2_MOUSE Acyl-coenzyme A thioesterase 2, mitochondrial OS=Mus musculus OX=10090 GN=Acot2 PE=1 SV=2	6	3	3	3	3	3	3	3	0	1	0	0	0	3	3	3	3	3	3	3	0	1	0	0	0	3	3	3	3	3	3	3	0	1	0	0	0	3	3	3	8.8	8.8
P68033;P68134;P62737;P63268	P68033;P68134;P62737;P63268	17;16;16;15	8;7;8;7	8;7;8;7	Actin, alpha cardiac muscle 1;Actin, alpha skeletal muscle;Actin, aortic smooth muscle;Actin, gamma-enteric smooth muscle	Actc1;Acta1;Acta2;Actg2	sp|P68033|ACTC_MOUSE Actin, alpha cardiac muscle 1 OS=Mus musculus OX=10090 GN=Actc1 PE=1 SV=1;sp|P68134|ACTS_MOUSE Actin, alpha skeletal muscle OS=Mus musculus OX=10090 GN=Acta1 PE=1 SV=1;sp|P62737|ACTA_MOUSE Actin, aortic smooth muscle OS=Mus musculus OX	4	17	8	8	15	16	15	15	12	11	13	13	14	16	15	16	6	7	6	6	5	4	6	5	5	7	6	7	6	7	6	6	5	4	6	5	5	7	6	7	62.1	36.6
P63260	P63260	18	18	1	Actin, cytoplasmic 2;Actin, cytoplasmic 2, N-terminally processed	Actg1	sp|P63260|ACTG_MOUSE Actin, cytoplasmic 2 OS=Mus musculus OX=10090 GN=Actg1 PE=1 SV=1	1	18	18	1	17	17	18	18	13	12	14	13	14	17	18	18	17	17	18	18	13	12	14	13	14	17	18	18	1	1	1	1	0	0	0	0	0	1	1	1	68.5	68.5
Q62151	Q62151	5	5	5	Advanced glycosylation end product-specific receptor	Ager	sp|Q62151|RAGE_MOUSE Advanced glycosylation end product-specific receptor OS=Mus musculus OX=10090 GN=Ager PE=1 SV=2	1	5	5	5	5	5	5	5	2	3	3	3	2	5	5	5	5	5	5	5	2	3	3	3	2	5	5	5	5	5	5	5	2	3	3	3	2	5	5	5	17.2	17.2
P29699	P29699	8	8	8	Alpha-2-HS-glycoprotein	Ahsg	sp|P29699|FETUA_MOUSE Alpha-2-HS-glycoprotein OS=Mus musculus OX=10090 GN=Ahsg PE=1 SV=1	1	8	8	8	7	7	8	7	5	5	5	6	5	7	7	6	7	7	8	7	5	5	5	6	5	7	7	6	7	7	8	7	5	5	5	6	5	7	7	6	33.9	33.9
P07724	P07724	48	48	47	Serum albumin	Alb	sp|P07724|ALBU_MOUSE Albumin OS=Mus musculus OX=10090 GN=Alb PE=1 SV=3	1	48	48	47	45	45	45	44	37	38	39	38	39	46	42	45	45	45	45	44	37	38	39	38	39	46	42	45	44	44	44	43	36	37	38	37	38	45	41	44	76	76
Q8CHT0	Q8CHT0	4	4	4	Delta-1-pyrroline-5-carboxylate dehydrogenase, mitochondrial	Aldh4a1	sp|Q8CHT0|AL4A1_MOUSE Delta-1-pyrroline-5-carboxylate dehydrogenase, mitochondrial OS=Mus musculus OX=10090 GN=Aldh4a1 PE=1 SV=3	1	4	4	4	4	4	3	4	1	0	0	1	1	2	4	4	4	4	3	4	1	0	0	1	1	2	4	4	4	4	3	4	1	0	0	1	1	2	4	4	10	10
Q9EQ20	Q9EQ20	5	5	5	Methylmalonate-semialdehyde dehydrogenase [acylating], mitochondrial	Aldh6a1	sp|Q9EQ20|MMSA_MOUSE Methylmalonate-semialdehyde dehydrogenase [acylating], mitochondrial OS=Mus musculus OX=10090 GN=Aldh6a1 PE=1 SV=1	1	5	5	5	5	5	5	4	2	2	2	3	2	4	4	4	5	5	5	4	2	2	2	3	2	4	4	4	5	5	5	4	2	2	2	3	2	4	4	4	12.3	12.3
Q8R146	Q8R146	25	25	25	Acylamino-acid-releasing enzyme	Apeh	sp|Q8R146|APEH_MOUSE Acylamino-acid-releasing enzyme OS=Mus musculus OX=10090 GN=Apeh PE=1 SV=3	1	25	25	25	25	24	25	25	6	3	5	2	3	24	22	25	25	24	25	25	6	3	5	2	3	24	22	25	25	24	25	25	6	3	5	2	3	24	22	25	53.8	53.8
Q00623	Q00623	6	6	6	Apolipoprotein A-I;Proapolipoprotein A-I;Truncated apolipoprotein A-I	Apoa1	sp|Q00623|APOA1_MOUSE Apolipoprotein A-I OS=Mus musculus OX=10090 GN=Apoa1 PE=1 SV=2	1	6	6	6	6	6	6	6	5	6	6	6	6	6	6	6	6	6	6	6	5	6	6	6	6	6	6	6	6	6	6	6	5	6	6	6	6	6	6	6	24.6	24.6
P61205;P84078;Q8BSL7;P84084	P61205;P84078;Q8BSL7;P84084	6;6;5;3	6;6;5;3	4;4;3;1	ADP-ribosylation factor 3;ADP-ribosylation factor 1;ADP-ribosylation factor 2;ADP-ribosylation factor 5	Arf3;Arf1;Arf2;Arf5	sp|P61205|ARF3_MOUSE ADP-ribosylation factor 3 OS=Mus musculus OX=10090 GN=Arf3 PE=2 SV=2;sp|P84078|ARF1_MOUSE ADP-ribosylation factor 1 OS=Mus musculus OX=10090 GN=Arf1 PE=1 SV=2;sp|Q8BSL7|ARF2_MOUSE ADP-ribosylation factor 2 OS=Mus musculus OX=10090 GN=A	4	6	6	4	4	6	5	4	2	1	0	1	1	5	3	4	4	6	5	4	2	1	0	1	1	5	3	4	3	4	3	3	2	1	0	1	1	4	2	3	43.6	43.6
P61750	P61750	4	2	2	ADP-ribosylation factor 4	Arf4	sp|P61750|ARF4_MOUSE ADP-ribosylation factor 4 OS=Mus musculus OX=10090 GN=Arf4 PE=1 SV=2	1	4	2	2	3	4	4	3	1	1	0	1	0	3	3	3	2	2	2	2	1	1	0	1	0	2	2	2	2	2	2	2	1	1	0	1	0	2	2	2	27.2	9.4
Q5FWK3	Q5FWK3	4	4	4	Rho GTPase-activating protein 1	Arhgap1	sp|Q5FWK3|RHG01_MOUSE Rho GTPase-activating protein 1 OS=Mus musculus OX=10090 GN=Arhgap1 PE=1 SV=1	1	4	4	4	2	3	2	3	1	2	1	1	1	3	2	2	2	3	2	3	1	2	1	1	1	3	2	2	2	3	2	3	1	2	1	1	1	3	2	2	10	10
Q9WV54	Q9WV54	6	6	6	Acid ceramidase;Acid ceramidase subunit alpha;Acid ceramidase subunit beta	Asah1	sp|Q9WV54|ASAH1_MOUSE Acid ceramidase OS=Mus musculus OX=10090 GN=Asah1 PE=1 SV=1	1	6	6	6	6	6	6	6	1	0	1	0	0	5	6	6	6	6	6	6	1	0	1	0	0	5	6	6	6	6	6	6	1	0	1	0	0	5	6	6	18.3	18.3
Q03265;REV__Q6S5J6;REV__P54729	Q03265	8;1;1	8;1;1	8;1;1	ATP synthase subunit alpha, mitochondrial	Atp5a1	sp|Q03265|ATPA_MOUSE ATP synthase subunit alpha, mitochondrial OS=Mus musculus OX=10090 GN=Atp5f1a PE=1 SV=1	3	8	8	8	7	6	6	7	0	0	1	4	4	5	5	7	7	6	6	7	0	0	1	4	4	5	5	7	7	6	6	7	0	0	1	4	4	5	5	7	15.2	15.2
Q03311	Q03311	6	6	6	Cholinesterase	Bche	sp|Q03311|CHLE_MOUSE Cholinesterase OS=Mus musculus OX=10090 GN=Bche PE=1 SV=2	1	6	6	6	6	6	6	6	0	0	0	0	1	6	5	5	6	6	6	6	0	0	0	0	1	6	5	5	6	6	6	6	0	0	0	0	1	6	5	5	9.6	9.6
Q8CIF4	Q8CIF4	9	9	9	Biotinidase	Btd	sp|Q8CIF4|BTD_MOUSE Biotinidase OS=Mus musculus OX=10090 GN=Btd PE=1 SV=2	1	9	9	9	9	9	8	7	0	0	0	0	1	8	7	6	9	9	8	7	0	0	0	0	1	8	7	6	9	9	8	7	0	0	0	0	1	8	7	6	26.5	26.5
P13634	P13634	2	2	2	Carbonic anhydrase 1	Ca1	sp|P13634|CAH1_MOUSE Carbonic anhydrase 1 OS=Mus musculus OX=10090 GN=Ca1 PE=1 SV=4	1	2	2	2	2	2	2	2	1	2	1	1	1	2	2	2	2	2	2	2	1	2	1	1	1	2	2	2	2	2	2	2	1	2	1	1	1	2	2	2	8.8	8.8
P48758	P48758	3	3	3	Carbonyl reductase [NADPH] 1	Cbr1	sp|P48758|CBR1_MOUSE Carbonyl reductase [NADPH] 1 OS=Mus musculus OX=10090 GN=Cbr1 PE=1 SV=3	1	3	3	3	3	3	3	3	1	1	1	1	1	2	3	3	3	3	3	3	1	1	1	1	1	2	3	3	3	3	3	3	1	1	1	1	1	2	3	3	13	13
Q9D024	Q9D024	1	1	1	Coiled-coil domain-containing protein 47	Ccdc47	sp|Q9D024|CCD47_MOUSE Coiled-coil domain-containing protein 47 OS=Mus musculus OX=10090 GN=Ccdc47 PE=1 SV=2	1	1	1	1	1	1	0	1	1	0	1	1	0	1	1	1	1	1	0	1	1	0	1	1	0	1	1	1	1	1	0	1	1	0	1	1	0	1	1	1	2.5	2.5
Q8VCC2	Q8VCC2	11	8	8	Liver carboxylesterase 1	Ces1	sp|Q8VCC2|EST1_MOUSE Liver carboxylesterase 1 OS=Mus musculus OX=10090 GN=Ces1 PE=1 SV=1	1	11	8	8	11	11	11	11	3	3	3	2	2	10	11	11	8	8	8	8	0	0	0	0	0	7	8	8	8	8	8	8	0	0	0	0	0	7	8	8	24.1	19.1
P23953	P23953	23	20	20	Carboxylesterase 1C	Ces1c	sp|P23953|EST1C_MOUSE Carboxylesterase 1C OS=Mus musculus OX=10090 GN=Ces1c PE=1 SV=4	1	23	20	20	22	22	23	23	20	19	20	10	11	21	19	20	19	19	20	20	17	16	17	7	8	18	16	17	19	19	20	20	17	16	17	7	8	18	16	17	57.8	52.3
Q8VCT4	Q8VCT4	26	26	22	Carboxylesterase 1D	Ces1d	sp|Q8VCT4|EST1D_MOUSE Carboxylesterase 1D OS=Mus musculus OX=10090 GN=Ces1d PE=1 SV=1	1	26	26	22	26	26	26	25	16	15	20	10	9	24	22	24	26	26	26	25	16	15	20	10	9	24	22	24	22	22	22	21	12	11	16	7	6	20	18	20	60.5	60.5
Q91WU0	Q91WU0	18	17	15	Carboxylic ester hydrolase	Ces1f	sp|Q91WU0|EST1F_MOUSE Carboxylesterase 1F OS=Mus musculus OX=10090 GN=Ces1f PE=1 SV=1	1	18	17	15	18	17	18	18	3	3	3	1	1	17	17	18	17	16	17	17	2	2	2	0	0	16	16	17	15	14	15	15	1	1	1	0	0	14	14	15	41.5	40.3
Q91WG0	Q91WG0	8	6	5	Acylcarnitine hydrolase	Ces2c	sp|Q91WG0|EST2C_MOUSE Acylcarnitine hydrolase OS=Mus musculus OX=10090 GN=Ces2c PE=1 SV=1	1	8	6	5	8	8	8	8	1	1	1	0	0	8	8	8	6	6	6	6	0	0	0	0	0	6	6	6	5	5	5	5	0	0	0	0	0	5	5	5	18.5	14.8
Q8BK48;Q6AW46	Q8BK48	9;1	9;1	6;0	Pyrethroid hydrolase Ces2e	Ces2e	sp|Q8BK48|EST2E_MOUSE Pyrethroid hydrolase Ces2e OS=Mus musculus OX=10090 GN=Ces2e PE=1 SV=1	2	9	9	6	9	9	9	9	1	1	2	0	0	9	8	9	9	9	9	9	1	1	2	0	0	9	8	9	6	6	6	6	0	0	1	0	0	6	5	6	21.3	21.3
P18760	P18760	3	3	3	Cofilin-1	Cfl1	sp|P18760|COF1_MOUSE Cofilin-1 OS=Mus musculus OX=10090 GN=Cfl1 PE=1 SV=3	1	3	3	3	3	2	2	2	1	1	1	1	1	1	1	2	3	2	2	2	1	1	1	1	1	1	1	2	3	2	2	2	1	1	1	1	1	1	1	2	34.3	34.3
Q9D7P7	Q9D7P7	5	5	5	Chloride intracellular channel protein 3	Clic3	sp|Q9D7P7|CLIC3_MOUSE Chloride intracellular channel protein 3 OS=Mus musculus OX=10090 GN=Clic3 PE=1 SV=2	1	5	5	5	3	4	4	5	0	0	0	0	1	3	5	4	3	4	4	5	0	0	0	0	1	3	5	4	3	4	4	5	0	0	0	0	1	3	5	4	27.8	27.8
Q9QYB1	Q9QYB1	4	4	4	Chloride intracellular channel protein 4	Clic4	sp|Q9QYB1|CLIC4_MOUSE Chloride intracellular channel protein 4 OS=Mus musculus OX=10090 GN=Clic4 PE=1 SV=3	1	4	4	4	4	3	4	4	0	0	0	1	0	3	4	4	4	3	4	4	0	0	0	1	0	3	4	4	4	3	4	4	0	0	0	1	0	3	4	4	21.3	21.3
Q9CZU6	Q9CZU6	5	5	5	Citrate synthase, mitochondrial	Cs	sp|Q9CZU6|CISY_MOUSE Citrate synthase, mitochondrial OS=Mus musculus OX=10090 GN=Cs PE=1 SV=1	1	5	5	5	5	5	5	5	2	2	1	2	2	5	4	4	5	5	5	5	2	2	1	2	2	5	4	4	5	5	5	5	2	2	1	2	2	5	4	4	11.4	11.4
Q80Y98	Q80Y98	13	13	13	Phospholipase DDHD2	Ddhd2	sp|Q80Y98|DDHD2_MOUSE Phospholipase DDHD2 OS=Mus musculus OX=10090 GN=Ddhd2 PE=1 SV=3	1	13	13	13	11	12	12	12	0	0	0	0	0	12	11	12	11	12	12	12	0	0	0	0	0	12	11	12	11	12	12	12	0	0	0	0	0	12	11	12	24.6	24.6
Q9Z1N5;Q8VDW0	Q9Z1N5;Q8VDW0	2;1	2;1	2;1	Spliceosome RNA helicase Ddx39b;ATP-dependent RNA helicase DDX39A	Ddx39b;Ddx39a	sp|Q9Z1N5|DX39B_MOUSE Spliceosome RNA helicase Ddx39b OS=Mus musculus OX=10090 GN=Ddx39b PE=1 SV=1;sp|Q8VDW0|DX39A_MOUSE ATP-dependent RNA helicase DDX39A OS=Mus musculus OX=10090 GN=Ddx39a PE=1 SV=1	2	2	2	2	2	2	2	2	1	1	1	1	1	2	2	2	2	2	2	2	1	1	1	1	1	2	2	2	2	2	2	2	1	1	1	1	1	2	2	2	5.6	5.6
P28843	P28843	3	3	3	Dipeptidyl peptidase 4;Dipeptidyl peptidase 4 membrane form;Dipeptidyl peptidase 4 soluble form	Dpp4	sp|P28843|DPP4_MOUSE Dipeptidyl peptidase 4 OS=Mus musculus OX=10090 GN=Dpp4 PE=1 SV=3	1	3	3	3	3	2	2	3	0	0	0	0	0	3	3	3	3	2	2	3	0	0	0	0	0	3	3	3	3	2	2	3	0	0	0	0	0	3	3	3	4.5	4.5
Q9EQP2	Q9EQP2	5	5	5	EH domain-containing protein 4	Ehd4	sp|Q9EQP2|EHD4_MOUSE EH domain-containing protein 4 OS=Mus musculus OX=10090 GN=Ehd4 PE=1 SV=1	1	5	5	5	5	5	5	5	0	1	0	1	1	5	4	5	5	5	5	5	0	1	0	1	1	5	4	5	5	5	5	5	0	1	0	1	1	5	4	5	10.7	10.7
P60843;P10630	P60843;P10630	4;2	4;2	4;2	Eukaryotic initiation factor 4A-I;Eukaryotic initiation factor 4A-II;Eukaryotic initiation factor 4A-II, N-terminally processed	Eif4a1;Eif4a2	sp|P60843|IF4A1_MOUSE Eukaryotic initiation factor 4A-I OS=Mus musculus OX=10090 GN=Eif4a1 PE=1 SV=1;sp|P10630|IF4A2_MOUSE Eukaryotic initiation factor 4A-II OS=Mus musculus OX=10090 GN=Eif4a2 PE=1 SV=2	2	4	4	4	4	4	4	4	1	3	1	2	1	4	4	4	4	4	4	4	1	3	1	2	1	4	4	4	4	4	4	4	1	3	1	2	1	4	4	4	11.1	11.1
Q8CGC7	Q8CGC7	2	2	2	Bifunctional glutamate/proline--tRNA ligase;Glutamate--tRNA ligase;Proline--tRNA ligase	Eprs	sp|Q8CGC7|SYEP_MOUSE Bifunctional glutamate/proline--tRNA ligase OS=Mus musculus OX=10090 GN=Eprs1 PE=1 SV=4	1	2	2	2	2	2	2	2	0	0	0	1	0	2	2	2	2	2	2	2	0	0	0	1	0	2	2	2	2	2	2	2	0	0	0	1	0	2	2	2	1.6	1.6
Q9R0P3	Q9R0P3	13	13	13	S-formylglutathione hydrolase	Esd	sp|Q9R0P3|ESTD_MOUSE S-formylglutathione hydrolase OS=Mus musculus OX=10090 GN=Esd PE=1 SV=1	1	13	13	13	13	12	13	12	9	8	7	5	4	13	12	12	13	12	13	12	9	8	7	5	4	13	12	12	13	12	13	12	9	8	7	5	4	13	12	12	63.1	63.1
Q99LC5	Q99LC5	5	5	5	Electron transfer flavoprotein subunit alpha, mitochondrial	Etfa	sp|Q99LC5|ETFA_MOUSE Electron transfer flavoprotein subunit alpha, mitochondrial OS=Mus musculus OX=10090 GN=Etfa PE=1 SV=2	1	5	5	5	5	5	5	5	2	2	1	2	1	5	5	5	5	5	5	5	2	2	1	2	1	5	5	5	5	5	5	5	2	2	1	2	1	5	5	5	22.2	22.2
P19096	P19096	106	106	106	Fatty acid synthase;[Acyl-carrier-protein] S-acetyltransferase;[Acyl-carrier-protein] S-malonyltransferase;3-oxoacyl-[acyl-carrier-protein] synthase;3-oxoacyl-[acyl-carrier-protein] reductase;3-hydroxyacyl-[acyl-carrier-protein] dehydratase;Enoyl-[acyl-carrier-protein] reductase;Oleoyl-[acyl-carrier-protein] hydrolase	Fasn	sp|P19096|FAS_MOUSE Fatty acid synthase OS=Mus musculus OX=10090 GN=Fasn PE=1 SV=2	1	106	106	106	104	104	106	102	76	70	67	65	60	101	96	97	104	104	106	102	76	70	67	65	60	101	96	97	104	104	106	102	76	70	67	65	60	101	96	97	55.6	55.6
Q8K1B8	Q8K1B8	4	4	4	Fermitin family homolog 3	Fermt3	sp|Q8K1B8|URP2_MOUSE Fermitin family homolog 3 OS=Mus musculus OX=10090 GN=Fermt3 PE=1 SV=1	1	4	4	4	4	4	4	4	1	1	1	1	1	4	3	4	4	4	4	4	1	1	1	1	1	4	3	4	4	4	4	4	1	1	1	1	1	4	3	4	6.2	6.2
Q00612;P97324	Q00612;P97324	4;3	4;3	4;3	Glucose-6-phosphate 1-dehydrogenase X;Glucose-6-phosphate 1-dehydrogenase 2	G6pdx;G6pd2	sp|Q00612|G6PD1_MOUSE Glucose-6-phosphate 1-dehydrogenase X OS=Mus musculus OX=10090 GN=G6pdx PE=1 SV=3;sp|P97324|G6PD2_MOUSE Glucose-6-phosphate 1-dehydrogenase 2 OS=Mus musculus OX=10090 GN=G6pd2 PE=1 SV=3	2	4	4	4	4	4	4	3	2	2	1	2	2	3	4	3	4	4	4	3	2	2	1	2	2	3	4	3	4	4	4	3	2	2	1	2	2	3	4	3	9.1	9.1
P16858;Q64467	P16858	14;2	14;2	14;2	Glyceraldehyde-3-phosphate dehydrogenase	Gapdh	sp|P16858|G3P_MOUSE Glyceraldehyde-3-phosphate dehydrogenase OS=Mus musculus OX=10090 GN=Gapdh PE=1 SV=2	2	14	14	14	13	14	14	14	8	11	9	9	10	14	14	14	13	14	14	14	8	11	9	9	10	14	14	14	13	14	14	14	8	11	9	9	10	14	14	14	54.4	54.4
P21614	P21614	2	2	2	Vitamin D-binding protein	Gc	sp|P21614|VTDB_MOUSE Vitamin D-binding protein OS=Mus musculus OX=10090 GN=Gc PE=1 SV=2	1	2	2	2	2	2	2	2	1	0	0	0	0	2	2	2	2	2	2	2	1	0	0	0	0	2	2	2	2	2	2	2	1	0	0	0	0	2	2	2	5	5
Q99JY3	Q99JY3	2	2	2	GTPase IMAP family member 4	Gimap4	sp|Q99JY3|GIMA4_MOUSE GTPase IMAP family member 4 OS=Mus musculus OX=10090 GN=Gimap4 PE=1 SV=2	1	2	2	2	2	2	2	2	0	0	0	0	1	2	2	2	2	2	2	2	0	0	0	0	1	2	2	2	2	2	2	2	0	0	0	0	1	2	2	2	10.7	10.7
P08752;P18872;P63094;B2RSH2;Q9DC51;Q8CGK7;P20612;P50149;Q6R0H7;Q3V3I2	P08752	3;1;1;1;1;1;1;1;1;1	3;1;1;1;1;1;1;1;1;1	3;1;1;1;1;1;1;1;1;1	Guanine nucleotide-binding protein G(i) subunit alpha-2	Gnai2	sp|P08752|GNAI2_MOUSE Guanine nucleotide-binding protein G(i) subunit alpha-2 OS=Mus musculus OX=10090 GN=Gnai2 PE=1 SV=5	10	3	3	3	3	3	3	3	0	1	0	1	1	3	3	3	3	3	3	3	0	1	0	1	1	3	3	3	3	3	3	3	0	1	0	1	1	3	3	3	11	11
P30115;P13745;P10648	P30115	5;2;1	5;2;1	3;1;1	Glutathione S-transferase A3	Gsta3	sp|P30115|GSTA3_MOUSE Glutathione S-transferase A3 OS=Mus musculus OX=10090 GN=Gsta3 PE=1 SV=2	3	5	5	3	5	5	5	5	5	5	5	4	4	5	5	5	5	5	5	5	5	5	5	4	4	5	5	5	3	3	3	3	3	3	3	3	3	3	3	3	20.8	20.8
O09131	O09131	3	3	3	Glutathione S-transferase omega-1	Gsto1	sp|O09131|GSTO1_MOUSE Glutathione S-transferase omega-1 OS=Mus musculus OX=10090 GN=Gsto1 PE=1 SV=2	1	3	3	3	3	3	3	3	3	1	2	2	1	2	3	2	3	3	3	3	3	1	2	2	1	2	3	2	3	3	3	3	3	1	2	2	1	2	3	2	13.3	13.3
Q64471	Q64471	3	3	3	Glutathione S-transferase theta-1	Gstt1	sp|Q64471|GSTT1_MOUSE Glutathione S-transferase theta-1 OS=Mus musculus OX=10090 GN=Gstt1 PE=1 SV=4	1	3	3	3	3	3	3	2	1	1	0	0	1	3	2	3	3	3	3	2	1	1	0	0	1	3	2	3	3	3	3	2	1	1	0	0	1	3	2	3	15	15
Q99L20	Q99L20	4	4	4		Gstt3	sp|Q99L20|GSTT3_MOUSE Glutathione S-transferase theta-3 OS=Mus musculus OX=10090 GN=Gstt3 PE=1 SV=1	1	4	4	4	4	4	4	4	0	0	0	0	0	4	4	3	4	4	4	4	0	0	0	0	0	4	4	3	4	4	4	4	0	0	0	0	0	4	4	3	18.3	18.3
Q9DB29	Q9DB29	5	5	5	Isoamyl acetate-hydrolyzing esterase 1 homolog	Iah1	sp|Q9DB29|IAH1_MOUSE Isoamyl acetate-hydrolyzing esterase 1 homolog OS=Mus musculus OX=10090 GN=Iah1 PE=1 SV=1	1	5	5	5	3	2	4	4	0	0	0	0	0	3	4	4	3	2	4	4	0	0	0	0	0	3	4	4	3	2	4	4	0	0	0	0	0	3	4	4	26.5	26.5
Q9D6R2	Q9D6R2	6	6	6	Isocitrate dehydrogenase [NAD] subunit alpha, mitochondrial	Idh3a	sp|Q9D6R2|IDH3A_MOUSE Isocitrate dehydrogenase [NAD] subunit alpha, mitochondrial OS=Mus musculus OX=10090 GN=Idh3a PE=1 SV=1	1	6	6	6	4	6	6	6	0	1	0	0	0	5	6	5	4	6	6	6	0	1	0	0	0	5	6	5	4	6	6	6	0	1	0	0	0	5	6	5	18.6	18.6
P01868;P01869	P01868;P01869	2;2	2;2	2;2	Ig gamma-1 chain C region secreted form;Ig gamma-1 chain C region, membrane-bound form	Ighg1	sp|P01868|IGHG1_MOUSE Ig gamma-1 chain C region secreted form OS=Mus musculus OX=10090 GN=Ighg1 PE=1 SV=1;sp|P01869|IGH1M_MOUSE Ig gamma-1 chain C region, membrane-bound form OS=Mus musculus OX=10090 GN=Ighg1 PE=1 SV=2	2	2	2	2	0	0	2	2	0	0	1	1	1	1	1	0	0	0	2	2	0	0	1	1	1	1	1	0	0	0	2	2	0	0	1	1	1	1	1	0	6.8	6.8
P01872	P01872	2	2	2	Ig mu chain C region	Ighm	sp|P01872|IGHM_MOUSE Immunoglobulin heavy constant mu OS=Mus musculus OX=10090 GN=Ighm PE=1 SV=2	1	2	2	2	2	2	2	2	0	0	0	0	0	2	2	2	2	2	2	2	0	0	0	0	0	2	2	2	2	2	2	2	0	0	0	0	0	2	2	2	6.2	6.2
O55222	O55222	2	2	2	Integrin-linked protein kinase	Ilk	sp|O55222|ILK_MOUSE Integrin-linked protein kinase OS=Mus musculus OX=10090 GN=Ilk PE=1 SV=2	1	2	2	2	1	1	1	1	1	1	0	0	1	1	2	1	1	1	1	1	1	1	0	0	1	1	2	1	1	1	1	1	1	1	0	0	1	1	2	1	5.1	5.1
P26262	P26262	4	4	4	Plasma kallikrein;Plasma kallikrein heavy chain;Plasma kallikrein light chain	Klkb1	sp|P26262|KLKB1_MOUSE Plasma kallikrein OS=Mus musculus OX=10090 GN=Klkb1 PE=1 SV=2	1	4	4	4	4	4	4	4	1	0	0	0	0	4	4	4	4	4	4	4	1	0	0	0	0	4	4	4	4	4	4	4	1	0	0	0	0	4	4	4	6.9	6.9
O08677	O08677	7	7	7	Kininogen-1;Kininogen-1 heavy chain;Bradykinin;Kininogen-1 light chain	Kng1	sp|O08677|KNG1_MOUSE Kininogen-1 OS=Mus musculus OX=10090 GN=Kng1 PE=1 SV=1	1	7	7	7	7	7	7	7	1	3	3	3	2	7	7	7	7	7	7	7	1	3	3	3	2	7	7	7	7	7	7	7	1	3	3	3	2	7	7	7	12.7	12.7
P16301	P16301	9	9	9	Phosphatidylcholine-sterol acyltransferase	Lcat	sp|P16301|LCAT_MOUSE Phosphatidylcholine-sterol acyltransferase OS=Mus musculus OX=10090 GN=Lcat PE=1 SV=2	1	9	9	9	8	8	8	9	1	1	3	1	0	8	8	8	8	8	8	9	1	1	3	1	0	8	8	8	8	8	8	9	1	1	3	1	0	8	8	8	25.8	25.8
Q61233	Q61233	9	9	7	Plastin-2	Lcp1	sp|Q61233|PLSL_MOUSE Plastin-2 OS=Mus musculus OX=10090 GN=Lcp1 PE=1 SV=4	1	9	9	7	9	9	9	9	4	5	3	3	1	9	9	9	9	9	9	9	4	5	3	3	1	9	9	9	7	7	7	7	3	5	3	3	1	7	7	7	16.1	16.1
Q9Z0M5	Q9Z0M5	2	2	2	Lysosomal acid lipase/cholesteryl ester hydrolase	Lipa	sp|Q9Z0M5|LICH_MOUSE Lysosomal acid lipase/cholesteryl ester hydrolase OS=Mus musculus OX=10090 GN=Lipa PE=1 SV=2	1	2	2	2	2	2	2	2	0	0	0	0	0	2	2	2	2	2	2	2	0	0	0	0	0	2	2	2	2	2	2	2	0	0	0	0	0	2	2	2	4.3	4.3
P54310	P54310	19	19	19	Hormone-sensitive lipase	Lipe	sp|P54310|LIPS_MOUSE Hormone-sensitive lipase OS=Mus musculus OX=10090 GN=Lipe PE=1 SV=2	1	19	19	19	19	19	19	18	1	3	1	0	1	10	4	8	19	19	19	18	1	3	1	0	1	10	4	8	19	19	19	18	1	3	1	0	1	10	4	8	36.1	36.1
P11152	P11152	4	4	4	Lipoprotein lipase	Lpl	sp|P11152|LIPL_MOUSE Lipoprotein lipase OS=Mus musculus OX=10090 GN=Lpl PE=1 SV=3	1	4	4	4	3	2	3	4	0	0	0	0	0	3	3	3	3	2	3	4	0	0	0	0	0	3	3	3	3	2	3	4	0	0	0	0	0	3	3	3	16.9	16.9
P97823	P97823	7	7	7	Acyl-protein thioesterase 1	Lypla1	sp|P97823|LYPA1_MOUSE Acyl-protein thioesterase 1 OS=Mus musculus OX=10090 GN=Lypla1 PE=1 SV=1	1	7	7	7	7	7	7	6	6	5	4	1	0	6	4	6	7	7	7	6	6	5	4	1	0	6	4	6	7	7	7	6	6	5	4	1	0	6	4	6	43	43
Q9WTL7	Q9WTL7	7	7	7	Acyl-protein thioesterase 2	Lypla2	sp|Q9WTL7|LYPA2_MOUSE Acyl-protein thioesterase 2 OS=Mus musculus OX=10090 GN=Lypla2 PE=1 SV=1	1	7	7	7	6	7	7	6	3	2	4	2	2	7	7	7	6	7	7	6	3	2	4	2	2	7	7	7	6	7	7	6	3	2	4	2	2	7	7	7	40.7	40.7
Q3UFF7	Q3UFF7	4	4	4	Lysophospholipase-like protein 1	Lyplal1	sp|Q3UFF7|LYPL1_MOUSE Lysophospholipase-like protein 1 OS=Mus musculus OX=10090 GN=Lyplal1 PE=1 SV=3	1	4	4	4	4	4	4	4	0	0	0	0	0	4	3	4	4	4	4	4	0	0	0	0	0	4	3	4	4	4	4	4	0	0	0	0	0	4	3	4	24.3	24.3
Q9D1H9	Q9D1H9	2	2	2	Microfibril-associated glycoprotein 4	Mfap4	sp|Q9D1H9|MFAP4_MOUSE Microfibril-associated glycoprotein 4 OS=Mus musculus OX=10090 GN=Mfap4 PE=1 SV=1	1	2	2	2	2	2	2	2	0	1	0	1	0	2	1	1	2	2	2	2	0	1	0	1	0	2	1	1	2	2	2	2	0	1	0	1	0	2	1	1	9.3	9.3
O35678	O35678	11	11	11	Monoglyceride lipase	Mgll	sp|O35678|MGLL_MOUSE Monoglyceride lipase OS=Mus musculus OX=10090 GN=Mgll PE=1 SV=1	1	11	11	11	11	11	11	11	3	5	5	1	0	7	2	5	11	11	11	11	3	5	5	1	0	7	2	5	11	11	11	11	3	5	5	1	0	7	2	5	53.8	53.8
Q6PDN3	Q6PDN3	3	3	3	Myosin light chain kinase, smooth muscle;Myosin light chain kinase, smooth muscle, deglutamylated form	Mylk	sp|Q6PDN3|MYLK_MOUSE Myosin light chain kinase, smooth muscle OS=Mus musculus OX=10090 GN=Mylk PE=1 SV=3	1	3	3	3	2	2	3	2	0	0	0	0	0	2	2	2	2	2	3	2	0	0	0	0	0	2	2	2	2	2	3	2	0	0	0	0	0	2	2	2	1.4	1.4
Q9WTI7	Q9WTI7	2	2	2	Unconventional myosin-Ic	Myo1c	sp|Q9WTI7|MYO1C_MOUSE Unconventional myosin-Ic OS=Mus musculus OX=10090 GN=Myo1c PE=1 SV=2	1	2	2	2	2	2	2	2	1	1	1	1	1	2	2	2	2	2	2	2	1	1	1	1	1	2	2	2	2	2	2	2	1	1	1	1	1	2	2	2	1.8	1.8
Q9JHW2	Q9JHW2	11	11	11	Omega-amidase NIT2	Nit2	sp|Q9JHW2|NIT2_MOUSE Omega-amidase NIT2 OS=Mus musculus OX=10090 GN=Nit2 PE=1 SV=1	1	11	11	11	11	10	11	10	0	0	0	0	0	10	10	10	11	10	11	10	0	0	0	0	0	10	10	10	11	10	11	10	0	0	0	0	0	10	10	10	55.8	55.8
Q61206	Q61206	4	4	4	Platelet-activating factor acetylhydrolase IB subunit beta	Pafah1b2	sp|Q61206|PA1B2_MOUSE Platelet-activating factor acetylhydrolase IB subunit beta OS=Mus musculus OX=10090 GN=Pafah1b2 PE=1 SV=2	1	4	4	4	4	4	4	4	1	2	1	0	0	3	4	4	4	4	4	4	1	2	1	0	0	3	4	4	4	4	4	4	1	2	1	0	0	3	4	4	27.1	27.1
Q61205	Q61205	8	8	8	Platelet-activating factor acetylhydrolase IB subunit gamma	Pafah1b3	sp|Q61205|PA1B3_MOUSE Platelet-activating factor acetylhydrolase IB subunit gamma OS=Mus musculus OX=10090 GN=Pafah1b3 PE=1 SV=1	1	8	8	8	7	7	8	7	0	0	0	0	0	8	7	7	7	7	8	7	0	0	0	0	0	8	7	7	7	7	8	7	0	0	0	0	0	8	7	7	41.4	41.4
Q8VDG7	Q8VDG7	8	8	8	Platelet-activating factor acetylhydrolase 2, cytoplasmic	Pafah2	sp|Q8VDG7|PAFA2_MOUSE Platelet-activating factor acetylhydrolase 2, cytoplasmic OS=Mus musculus OX=10090 GN=Pafah2 PE=1 SV=2	1	8	8	8	8	8	8	8	0	0	0	0	0	8	8	8	8	8	8	8	0	0	0	0	0	8	8	8	8	8	8	8	0	0	0	0	0	8	8	8	22.6	22.6
Q99LX0	Q99LX0	3	3	3	Protein deglycase DJ-1	Park7	sp|Q99LX0|PARK7_MOUSE Parkinson disease protein 7 homolog OS=Mus musculus OX=10090 GN=Park7 PE=1 SV=1	1	3	3	3	3	3	3	3	0	0	0	0	0	3	3	2	3	3	3	3	0	0	0	0	0	3	3	2	3	3	3	3	0	0	0	0	0	3	3	2	12.7	12.7
P60335;P57722	P60335;P57722	2;1	2;1	1;0	Poly(rC)-binding protein 1;Poly(rC)-binding protein 3	Pcbp1;Pcbp3	sp|P60335|PCBP1_MOUSE Poly(rC)-binding protein 1 OS=Mus musculus OX=10090 GN=Pcbp1 PE=1 SV=1;sp|P57722|PCBP3_MOUSE Poly(rC)-binding protein 3 OS=Mus musculus OX=10090 GN=Pcbp3 PE=1 SV=3	2	2	2	1	2	2	2	2	0	0	0	0	0	2	2	2	2	2	2	2	0	0	0	0	0	2	2	2	1	1	1	1	0	0	0	0	0	1	1	1	6.7	6.7
P12382	P12382	6	5	5	ATP-dependent 6-phosphofructokinase, liver type	Pfkl	sp|P12382|PFKAL_MOUSE ATP-dependent 6-phosphofructokinase, liver type OS=Mus musculus OX=10090 GN=Pfkl PE=1 SV=4	1	6	5	5	5	5	5	4	1	1	0	1	1	5	3	6	4	4	4	3	1	1	0	1	1	4	2	5	4	4	4	3	1	1	0	1	1	4	2	5	11.3	10.1
Q9WUA3	Q9WUA3	2	2	2	ATP-dependent 6-phosphofructokinase, platelet type	Pfkp	sp|Q9WUA3|PFKAP_MOUSE ATP-dependent 6-phosphofructokinase, platelet type OS=Mus musculus OX=10090 GN=Pfkp PE=1 SV=1	1	2	2	2	2	2	2	2	0	0	0	1	1	2	2	2	2	2	2	2	0	0	0	1	1	2	2	2	2	2	2	2	0	0	0	1	1	2	2	2	2.4	2.4
P62962	P62962	3	3	3	Profilin-1	Pfn1	sp|P62962|PROF1_MOUSE Profilin-1 OS=Mus musculus OX=10090 GN=Pfn1 PE=1 SV=2	1	3	3	3	3	3	3	3	2	2	2	2	2	3	3	2	3	3	3	3	2	2	2	2	2	3	3	2	3	3	3	3	2	2	2	2	2	3	3	2	30	30
Q8VEB4	Q8VEB4	4	4	4	Group XV phospholipase A2	Pla2g15	sp|Q8VEB4|PAG15_MOUSE Phospholipase A2 group XV OS=Mus musculus OX=10090 GN=Pla2g15 PE=1 SV=1	1	4	4	4	4	4	4	4	0	0	0	0	0	4	3	4	4	4	4	4	0	0	0	0	0	4	3	4	4	4	4	4	0	0	0	0	0	4	3	4	14.6	14.6
Q60963	Q60963	6	6	6	Platelet-activating factor acetylhydrolase	Pla2g7	sp|Q60963|PAFA_MOUSE Platelet-activating factor acetylhydrolase OS=Mus musculus OX=10090 GN=Pla2g7 PE=1 SV=2	1	6	6	6	6	6	6	6	0	1	0	0	0	6	6	6	6	6	6	6	0	1	0	0	0	6	6	6	6	6	6	6	0	1	0	0	0	6	6	6	17.3	17.3
Q9JHK5	Q9JHK5	2	2	2	Pleckstrin	Plek	sp|Q9JHK5|PLEK_MOUSE Pleckstrin OS=Mus musculus OX=10090 GN=Plek PE=1 SV=1	1	2	2	2	2	2	2	2	1	1	1	1	1	2	2	2	2	2	2	2	1	1	1	1	1	2	2	2	2	2	2	2	1	1	1	1	1	2	2	2	10.9	10.9
Q99K51;Q3V0K9	Q99K51	7;2	5;1	5;1	Plastin-3	Pls3	sp|Q99K51|PLST_MOUSE Plastin-3 OS=Mus musculus OX=10090 GN=Pls3 PE=1 SV=3	2	7	5	5	7	6	6	6	2	2	2	2	2	6	6	6	5	4	4	4	1	2	2	2	2	4	4	4	5	4	4	4	1	2	2	2	2	4	4	4	11.7	8.9
P17742	P17742	2	2	2	Peptidyl-prolyl cis-trans isomerase A;Peptidyl-prolyl cis-trans isomerase A, N-terminally processed	Ppia	sp|P17742|PPIA_MOUSE Peptidyl-prolyl cis-trans isomerase A OS=Mus musculus OX=10090 GN=Ppia PE=1 SV=2	1	2	2	2	2	2	2	2	1	2	2	2	1	2	2	2	2	2	2	2	1	2	2	2	1	2	2	2	2	2	2	2	1	2	2	2	1	2	2	2	11	11
P62141;P62137;P63087	P62141;P62137;P63087	2;2;2	2;2;2	2;2;2	Serine/threonine-protein phosphatase PP1-beta catalytic subunit;Serine/threonine-protein phosphatase PP1-alpha catalytic subunit;Serine/threonine-protein phosphatase PP1-gamma catalytic subunit	Ppp1cb;Ppp1ca;Ppp1cc	sp|P62141|PP1B_MOUSE Serine/threonine-protein phosphatase PP1-beta catalytic subunit OS=Mus musculus OX=10090 GN=Ppp1cb PE=1 SV=3;sp|P62137|PP1A_MOUSE Serine/threonine-protein phosphatase PP1-alpha catalytic subunit OS=Mus musculus OX=10090 GN=Ppp1ca PE=1	3	2	2	2	2	2	2	2	1	0	0	0	0	2	2	2	2	2	2	2	1	0	0	0	0	2	2	2	2	2	2	2	1	0	0	0	0	2	2	2	6.7	6.7
Q76MZ3	Q76MZ3	4	4	4	Serine/threonine-protein phosphatase 2A 65 kDa regulatory subunit A alpha isoform	Ppp2r1a	sp|Q76MZ3|2AAA_MOUSE Serine/threonine-protein phosphatase 2A 65 kDa regulatory subunit A alpha isoform OS=Mus musculus OX=10090 GN=Ppp2r1a PE=1 SV=3	1	4	4	4	4	4	4	3	2	2	2	2	1	3	3	3	4	4	4	3	2	2	2	2	1	3	3	3	4	4	4	3	2	2	2	2	1	3	3	3	8.1	8.1
Q7TMR0	Q7TMR0	7	7	7	Lysosomal Pro-X carboxypeptidase	Prcp	sp|Q7TMR0|PCP_MOUSE Lysosomal Pro-X carboxypeptidase OS=Mus musculus OX=10090 GN=Prcp PE=1 SV=2	1	7	7	7	7	7	7	6	0	1	2	1	1	7	5	6	7	7	7	6	0	1	2	1	1	7	5	6	7	7	7	6	0	1	2	1	1	7	5	6	22.4	22.4
Q9QUR6	Q9QUR6	32	32	32	Prolyl endopeptidase	Prep	sp|Q9QUR6|PPCE_MOUSE Prolyl endopeptidase OS=Mus musculus OX=10090 GN=Prep PE=1 SV=1	1	32	32	32	32	32	32	32	8	5	7	1	4	32	32	32	32	32	32	32	8	5	7	1	4	32	32	32	32	32	32	32	8	5	7	1	4	32	32	32	58	58
P97372	P97372	3	3	3	Proteasome activator complex subunit 2	Psme2	sp|P97372|PSME2_MOUSE Proteasome activator complex subunit 2 OS=Mus musculus OX=10090 GN=Psme2 PE=1 SV=4	1	3	3	3	3	3	3	2	1	1	1	1	1	3	2	3	3	3	3	2	1	1	1	1	1	3	2	3	3	3	3	2	1	1	1	1	1	3	2	3	17.6	17.6
P53994;P59279	P53994;P59279	2;1	2;1	2;1	Ras-related protein Rab-2A;Ras-related protein Rab-2B	Rab2a;Rab2b	sp|P53994|RAB2A_MOUSE Ras-related protein Rab-2A OS=Mus musculus OX=10090 GN=Rab2a PE=1 SV=1;sp|P59279|RAB2B_MOUSE Ras-related protein Rab-2B OS=Mus musculus OX=10090 GN=Rab2b PE=1 SV=1	2	2	2	2	2	2	2	2	2	2	1	1	1	2	2	2	2	2	2	2	2	2	1	1	1	2	2	2	2	2	2	2	2	2	1	1	1	2	2	2	12.3	12.3
O88851	O88851	5	5	5	Putative hydrolase RBBP9	Rbbp9	sp|O88851|RBBP9_MOUSE Putative hydrolase RBBP9 OS=Mus musculus OX=10090 GN=Rbbp9 PE=1 SV=2	1	5	5	5	5	5	5	5	0	1	0	0	0	5	5	4	5	5	5	5	0	1	0	0	0	5	5	4	5	5	5	5	0	1	0	0	0	5	5	4	37.6	37.6
Q91VI7	Q91VI7	6	6	6	Ribonuclease inhibitor	Rnh1	sp|Q91VI7|RINI_MOUSE Ribonuclease inhibitor OS=Mus musculus OX=10090 GN=Rnh1 PE=1 SV=1	1	6	6	6	6	6	6	6	2	4	3	1	3	6	6	6	6	6	6	6	2	4	3	1	3	6	6	6	6	6	6	6	2	4	3	1	3	6	6	6	15.8	15.8
Q06318	Q06318	3	3	3	Uteroglobin	Scgb1a1	sp|Q06318|UTER_MOUSE Uteroglobin OS=Mus musculus OX=10090 GN=Scgb1a1 PE=1 SV=1	1	3	3	3	3	3	3	3	2	2	2	2	2	3	3	3	3	3	3	3	2	2	2	2	2	3	3	3	3	3	3	3	2	2	2	2	2	3	3	3	19.8	19.8
P32261	P32261	6	6	6	Antithrombin-III	Serpinc1	sp|P32261|ANT3_MOUSE Antithrombin-III OS=Mus musculus OX=10090 GN=Serpinc1 PE=1 SV=1	1	6	6	6	5	6	6	6	1	2	1	0	1	5	6	6	5	6	6	6	1	2	1	0	1	5	6	6	5	6	6	6	1	2	1	0	1	5	6	6	13.3	13.3
Q9Z2I9	Q9Z2I9	7	7	7	Succinyl-CoA ligase [ADP-forming] subunit beta, mitochondrial	Sucla2	sp|Q9Z2I9|SUCB1_MOUSE Succinate--CoA ligase [ADP-forming] subunit beta, mitochondrial OS=Mus musculus OX=10090 GN=Sucla2 PE=1 SV=2	1	7	7	7	6	6	6	6	0	0	0	1	0	6	7	6	6	6	6	6	0	0	0	1	0	6	7	6	6	6	6	6	0	0	0	1	0	6	7	6	17.3	17.3
Q8BXJ2	Q8BXJ2	1	1	1	Transcriptional-regulating factor 1	Trerf1	sp|Q8BXJ2|TREF1_MOUSE Transcriptional-regulating factor 1 OS=Mus musculus OX=10090 GN=Trerf1 PE=1 SV=1	1	1	1	1	1	1	1	1	1	0	1	0	1	1	1	1	1	1	1	1	1	0	1	0	1	1	1	1	1	1	1	1	1	0	1	0	1	1	1	1	1	1
P68369;P05214	P68369;P05214	19;16	19;16	1;1	Tubulin alpha-1A chain;Tubulin alpha-3 chain	Tuba1a;Tuba3a	sp|P68369|TBA1A_MOUSE Tubulin alpha-1A chain OS=Mus musculus OX=10090 GN=Tuba1a PE=1 SV=1;sp|P05214|TBA3_MOUSE Tubulin alpha-3 chain OS=Mus musculus OX=10090 GN=Tuba3a PE=1 SV=1	2	19	19	1	19	19	19	18	10	10	9	9	10	18	17	17	19	19	19	18	10	10	9	9	10	18	17	17	1	1	1	1	1	1	1	1	1	1	1	1	52.8	52.8
P05213;Q3UX10	P05213	19;2	2;0	0;0	Tubulin alpha-1B chain	Tuba1b	sp|P05213|TBA1B_MOUSE Tubulin alpha-1B chain OS=Mus musculus OX=10090 GN=Tuba1b PE=1 SV=2	2	19	2	0	19	19	19	18	10	11	10	9	9	18	17	17	2	2	2	2	2	2	2	1	0	2	2	2	0	0	0	0	0	0	0	0	0	0	0	0	52.8	6
P68368	P68368	18	3	3	Tubulin alpha-4A chain	Tuba4a	sp|P68368|TBA4A_MOUSE Tubulin alpha-4A chain OS=Mus musculus OX=10090 GN=Tuba4a PE=1 SV=1	1	18	3	3	18	18	18	17	11	9	10	9	9	17	16	16	3	3	3	3	3	2	3	2	2	3	3	3	3	3	3	3	3	2	3	2	2	3	3	3	48.7	7.6
A2AQ07	A2AQ07	8	6	6	Tubulin beta-1 chain	Tubb1	sp|A2AQ07|TBB1_MOUSE Tubulin beta-1 chain OS=Mus musculus OX=10090 GN=Tubb1 PE=1 SV=1	1	8	6	6	7	7	7	7	4	2	3	3	3	7	7	7	5	5	5	5	2	1	1	2	2	5	5	5	5	5	5	5	2	1	1	2	2	5	5	5	25.3	20.8
Q7TMM9;Q9CWF2	Q7TMM9;Q9CWF2	15;14	2;1	2;1	Tubulin beta-2A chain;Tubulin beta-2B chain	Tubb2a;Tubb2b	sp|Q7TMM9|TBB2A_MOUSE Tubulin beta-2A chain OS=Mus musculus OX=10090 GN=Tubb2a PE=1 SV=1;sp|Q9CWF2|TBB2B_MOUSE Tubulin beta-2B chain OS=Mus musculus OX=10090 GN=Tubb2b PE=1 SV=1	2	15	2	2	15	15	15	14	10	8	9	10	10	13	13	14	2	2	2	2	0	0	0	1	1	2	2	2	2	2	2	2	0	0	0	1	1	2	2	2	47.2	4.7
P68372;Q9D6F9	P68372;Q9D6F9	21;17	21;17	5;4	Tubulin beta-4B chain;Tubulin beta-4A chain	Tubb4b;Tubb4a	sp|P68372|TBB4B_MOUSE Tubulin beta-4B chain OS=Mus musculus OX=10090 GN=Tubb4b PE=1 SV=1;sp|Q9D6F9|TBB4A_MOUSE Tubulin beta-4A chain OS=Mus musculus OX=10090 GN=Tubb4a PE=1 SV=3	2	21	21	5	21	21	21	20	14	10	12	13	12	19	19	19	21	21	21	20	14	10	12	13	12	19	19	19	5	5	5	5	3	2	2	2	3	5	4	4	70.6	70.6
P99024	P99024	18	4	3	Tubulin beta-5 chain	Tubb5	sp|P99024|TBB5_MOUSE Tubulin beta-5 chain OS=Mus musculus OX=10090 GN=Tubb5 PE=1 SV=1	1	18	4	3	18	18	18	16	12	9	10	12	10	16	16	16	4	4	4	3	2	1	1	2	2	3	2	3	3	3	3	2	2	1	1	2	1	2	2	2	62.8	15.5
Q62465	Q62465	8	8	8	Synaptic vesicle membrane protein VAT-1 homolog	Vat1	sp|Q62465|VAT1_MOUSE Synaptic vesicle membrane protein VAT-1 homolog OS=Mus musculus OX=10090 GN=Vat1 PE=1 SV=3	1	8	8	8	7	7	7	8	3	6	3	4	4	8	7	8	7	7	7	8	3	6	3	4	4	8	7	8	7	7	7	8	3	6	3	4	4	8	7	8	23.2	23.2
Q9Z0K8	Q9Z0K8	5	5	5	Pantetheinase	Vnn1	sp|Q9Z0K8|VNN1_MOUSE Pantetheinase OS=Mus musculus OX=10090 GN=Vnn1 PE=1 SV=3	1	5	5	5	5	5	5	5	0	0	0	0	0	5	4	5	5	5	5	5	0	0	0	0	0	5	4	5	5	5	5	5	0	0	0	0	0	5	4	5	13.1	13.1
Q9EQH3	Q9EQH3	2	2	2	Vacuolar protein sorting-associated protein 35	Vps35	sp|Q9EQH3|VPS35_MOUSE Vacuolar protein sorting-associated protein 35 OS=Mus musculus OX=10090 GN=Vps35 PE=1 SV=1	1	2	2	2	2	2	2	2	0	0	0	0	0	2	2	2	2	2	2	2	0	0	0	0	0	2	2	2	2	2	2	2	0	0	0	0	0	2	2	2	2.5	2.5
Q8CIZ8	Q8CIZ8	4	4	4	von Willebrand factor;von Willebrand antigen 2	Vwf	sp|Q8CIZ8|VWF_MOUSE von Willebrand factor OS=Mus musculus OX=10090 GN=Vwf PE=1 SV=2	1	4	4	4	4	3	4	3	2	2	2	2	2	2	2	3	4	3	4	3	2	2	2	2	2	2	2	3	4	3	4	3	2	2	2	2	2	2	2	3	1.9	1.9
P32921	P32921	4	4	4	Tryptophan--tRNA ligase, cytoplasmic;T1-TrpRS;T2-TrpRS	Wars	sp|P32921|SYWC_MOUSE Tryptophan--tRNA ligase, cytoplasmic OS=Mus musculus OX=10090 GN=Wars1 PE=1 SV=2	1	4	4	4	3	2	3	3	1	1	0	0	0	3	2	3	3	2	3	3	1	1	0	0	0	3	2	3	3	2	3	3	1	1	0	0	0	3	2	3	10.4	10.4
O88342	O88342	4	4	4	WD repeat-containing protein 1	Wdr1	sp|O88342|WDR1_MOUSE WD repeat-containing protein 1 OS=Mus musculus OX=10090 GN=Wdr1 PE=1 SV=3	1	4	4	4	4	4	4	3	1	1	2	1	0	3	4	4	4	4	4	3	1	1	2	1	0	3	4	4	4	4	4	3	1	1	2	1	0	3	4	4	9.7	9.7
Q9CQV8	Q9CQV8	3	2	2	14-3-3 protein beta/alpha;14-3-3 protein beta/alpha, N-terminally processed	Ywhab	sp|Q9CQV8|1433B_MOUSE 14-3-3 protein beta/alpha OS=Mus musculus OX=10090 GN=Ywhab PE=1 SV=3	1	3	2	2	3	2	3	3	2	2	2	2	2	3	2	1	2	1	2	2	1	1	1	1	1	2	2	1	2	1	2	2	1	1	1	1	1	2	2	1	13.4	9.3
P02769	P02769	3	2	2			sp|P02769|ALBU_BOVIN Serum albumin OS=Bos taurus OX=9913 GN=ALB PE=1 SV=4	1	3	2	2	3	3	3	3	3	3	3	3	3	3	3	3	2	2	2	2	2	2	2	2	2	2	2	2	2	2	2	2	2	2	2	2	2	2	2	2	7.1	4.8
Q8BVA5	Q8BVA5	2	2	2	UPF0554 protein C2orf43 homolog		sp|Q8BVA5|LDAH_MOUSE Lipid droplet-associated hydrolase OS=Mus musculus OX=10090 GN=Ldah PE=1 SV=1	1	2	2	2	2	2	2	2	0	0	0	0	0	2	2	2	2	2	2	2	0	0	0	0	0	2	2	2	2	2	2	2	0	0	0	0	0	2	2	2	8.3	8.3
Q99J08	Q99J08	1	1	1	SEC14-like protein 2	Sec14l2	sp|Q99J08|S14L2_MOUSE SEC14-like protein 2 OS=Mus musculus OX=10090 GN=Sec14l2 PE=1 SV=1	1	1	1	1	1	1	1	1	1	1	1	1	1	1	1	1	1	1	1	1	1	1	1	1	1	1	1	1	1	1	1	1	1	1	1	1	1	1	1	1	4.5	4.5
P51174	P51174	8	8	8	Long-chain specific acyl-CoA dehydrogenase, mitochondrial	Acadl	sp|P51174|ACADL_MOUSE Long-chain specific acyl-CoA dehydrogenase, mitochondrial OS=Mus musculus OX=10090 GN=Acadl PE=1 SV=2	1	8	8	8	8	7	8	8	4	5	4	5	4	8	8	8	8	7	8	8	4	5	4	5	4	8	8	8	8	7	8	8	4	5	4	5	4	8	8	8	22.1	22.1
P19157;P46425	P19157;P46425	6;3	6;3	6;3	Glutathione S-transferase P 1;Glutathione S-transferase P 2	Gstp1;Gstp2	sp|P19157|GSTP1_MOUSE Glutathione S-transferase P 1 OS=Mus musculus OX=10090 GN=Gstp1 PE=1 SV=2;sp|P46425|GSTP2_MOUSE Glutathione S-transferase P 2 OS=Mus musculus OX=10090 GN=Gstp2 PE=1 SV=2	2	6	6	6	6	6	6	6	3	4	3	3	2	6	5	6	6	6	6	6	3	4	3	3	2	6	5	6	6	6	6	6	3	4	3	3	2	6	5	6	44.8	44.8
P13707	P13707	10	10	10	Glycerol-3-phosphate dehydrogenase [NAD(+)], cytoplasmic	Gpd1	sp|P13707|GPDA_MOUSE Glycerol-3-phosphate dehydrogenase [NAD(+)], cytoplasmic OS=Mus musculus OX=10090 GN=Gpd1 PE=1 SV=3	1	10	10	10	9	10	10	10	7	6	8	6	7	10	10	10	9	10	10	10	7	6	8	6	7	10	10	10	9	10	10	10	7	6	8	6	7	10	10	10	25.2	25.2
Q91X72	Q91X72	14	14	14	Hemopexin	Hpx	sp|Q91X72|HEMO_MOUSE Hemopexin OS=Mus musculus OX=10090 GN=Hpx PE=1 SV=2	1	14	14	14	11	12	13	14	6	6	5	6	6	11	12	12	11	12	13	14	6	6	5	6	6	11	12	12	11	12	13	14	6	6	5	6	6	11	12	12	31.5	31.5
P10126;P62631	P10126;P62631	12;6	12;6	12;6	Elongation factor 1-alpha 1;Elongation factor 1-alpha 2	Eef1a1;Eef1a2	sp|P10126|EF1A1_MOUSE Elongation factor 1-alpha 1 OS=Mus musculus OX=10090 GN=Eef1a1 PE=1 SV=3;sp|P62631|EF1A2_MOUSE Elongation factor 1-alpha 2 OS=Mus musculus OX=10090 GN=Eef1a2 PE=1 SV=1	2	12	12	12	11	12	12	11	11	12	9	9	10	11	12	12	11	12	12	11	11	12	9	9	10	11	12	12	11	12	12	11	11	12	9	9	10	11	12	12	31.8	31.8
P24472	P24472	4	2	2	Glutathione S-transferase A4	Gsta4	sp|P24472|GSTA4_MOUSE Glutathione S-transferase A4 OS=Mus musculus OX=10090 GN=Gsta4 PE=1 SV=3	1	4	2	2	4	4	4	4	4	4	3	2	2	4	4	4	2	2	2	2	2	2	1	1	1	2	2	2	2	2	2	2	2	2	1	1	1	2	2	2	16.2	9.9
Q02053;P31254	Q02053	14;4	14;4	14;4	Ubiquitin-like modifier-activating enzyme 1	Uba1	sp|Q02053|UBA1_MOUSE Ubiquitin-like modifier-activating enzyme 1 OS=Mus musculus OX=10090 GN=Uba1 PE=1 SV=1	2	14	14	14	14	14	14	14	9	8	9	7	8	13	13	14	14	14	14	14	9	8	9	7	8	13	13	14	14	14	14	14	9	8	9	7	8	13	13	14	17	17
P27773	P27773	5	5	5	Protein disulfide-isomerase A3	Pdia3	sp|P27773|PDIA3_MOUSE Protein disulfide-isomerase A3 OS=Mus musculus OX=10090 GN=Pdia3 PE=1 SV=2	1	5	5	5	5	5	4	4	3	3	3	3	2	5	4	5	5	5	4	4	3	3	3	3	2	5	4	5	5	5	4	4	3	3	3	3	2	5	4	5	13.7	13.7
P00329	P00329	9	9	9	Alcohol dehydrogenase 1	Adh1	sp|P00329|ADH1_MOUSE Alcohol dehydrogenase 1 OS=Mus musculus OX=10090 GN=Adh1 PE=1 SV=2	1	9	9	9	9	9	9	9	6	5	6	6	4	8	9	9	9	9	9	9	6	5	6	6	4	8	9	9	9	9	9	9	6	5	6	6	4	8	9	9	42.9	42.9
P55264	P55264	4	4	4	Adenosine kinase	Adk	sp|P55264|ADK_MOUSE Adenosine kinase OS=Mus musculus OX=10090 GN=Adk PE=1 SV=2	1	4	4	4	3	4	4	4	1	2	2	2	1	4	3	3	3	4	4	4	1	2	2	2	1	4	3	3	3	4	4	4	1	2	2	2	1	4	3	3	10.5	10.5
Q61598	Q61598	12	12	9	Rab GDP dissociation inhibitor beta	Gdi2	sp|Q61598|GDIB_MOUSE Rab GDP dissociation inhibitor beta OS=Mus musculus OX=10090 GN=Gdi2 PE=1 SV=1	1	12	12	9	12	12	12	11	6	8	8	8	7	11	11	12	12	12	12	11	6	8	8	8	7	11	11	12	9	9	9	8	5	6	6	7	6	8	8	9	36.9	36.9
P52480;P53657	P52480	22;2	22;2	22;2	Pyruvate kinase PKM	Pkm	sp|P52480|KPYM_MOUSE Pyruvate kinase PKM OS=Mus musculus OX=10090 GN=Pkm PE=1 SV=4	2	22	22	22	21	22	22	21	16	13	16	15	14	20	19	22	21	22	22	21	16	13	16	15	14	20	19	22	21	22	22	21	16	13	16	15	14	20	19	22	57.3	57.3
P23492;Q8QZW3	P23492	3;1	3;1	3;1	Purine nucleoside phosphorylase	Pnp	sp|P23492|PNPH_MOUSE Purine nucleoside phosphorylase OS=Mus musculus OX=10090 GN=Pnp PE=1 SV=2	2	3	3	3	3	3	3	3	1	1	1	2	1	2	3	1	3	3	3	3	1	1	1	2	1	2	3	1	3	3	3	3	1	1	1	2	1	2	3	1	13.5	13.5
P10649;Q8R5I6;O35660;P48774	P10649	10;2;1;1	10;2;1;1	5;0;0;0	Glutathione S-transferase Mu 1	Gstm1	sp|P10649|GSTM1_MOUSE Glutathione S-transferase Mu 1 OS=Mus musculus OX=10090 GN=Gstm1 PE=1 SV=2	4	10	10	5	10	8	10	9	8	7	6	8	7	9	8	8	10	8	10	9	8	7	6	8	7	9	8	8	5	3	5	5	4	3	2	4	3	5	4	4	47.7	47.7
P06745	P06745	9	9	9	Glucose-6-phosphate isomerase	Gpi	sp|P06745|G6PI_MOUSE Glucose-6-phosphate isomerase OS=Mus musculus OX=10090 GN=Gpi PE=1 SV=4	1	9	9	9	9	9	8	8	6	6	6	5	6	9	8	9	9	9	8	8	6	6	6	5	6	9	8	9	9	9	8	8	6	6	6	5	6	9	8	9	21.9	21.9
O08529	O08529	10	10	10	Calpain-2 catalytic subunit	Capn2	sp|O08529|CAN2_MOUSE Calpain-2 catalytic subunit OS=Mus musculus OX=10090 GN=Capn2 PE=1 SV=4	1	10	10	10	10	10	10	9	6	7	7	7	7	10	8	9	10	10	10	9	6	7	7	7	7	10	8	9	10	10	10	9	6	7	7	7	7	10	8	9	21.4	21.4
P04247	P04247	4	4	4	Myoglobin	Mb	sp|P04247|MYG_MOUSE Myoglobin OS=Mus musculus OX=10090 GN=Mb PE=1 SV=3	1	4	4	4	4	4	4	3	3	2	2	2	3	4	3	3	4	4	4	3	3	2	2	2	3	4	3	3	4	4	4	3	3	2	2	2	3	4	3	3	27.3	27.3
Q9D8N0	Q9D8N0	4	4	4	Elongation factor 1-gamma	Eef1g	sp|Q9D8N0|EF1G_MOUSE Elongation factor 1-gamma OS=Mus musculus OX=10090 GN=Eef1g PE=1 SV=3	1	4	4	4	4	4	4	4	2	2	3	2	2	4	4	4	4	4	4	4	2	2	3	2	2	4	4	4	4	4	4	4	2	2	3	2	2	4	4	4	8.9	8.9
P24549;Q9CZS1;Q62148;Q9JHW9	P24549	29;2;2;2	29;2;2;2	18;0;0;0	Retinal dehydrogenase 1	Aldh1a1	sp|P24549|AL1A1_MOUSE Retinal dehydrogenase 1 OS=Mus musculus OX=10090 GN=Aldh1a1 PE=1 SV=5	4	29	29	18	29	29	28	29	26	21	22	23	23	28	26	29	29	29	28	29	26	21	22	23	23	28	26	29	18	18	17	18	16	12	14	14	13	17	15	18	63.5	63.5
P02088;P02089;P02104	P02088;P02089	11;6;1	11;6;1	11;6;1	Hemoglobin subunit beta-1;Hemoglobin subunit beta-2	Hbb-b1;Hbb-b2	sp|P02088|HBB1_MOUSE Hemoglobin subunit beta-1 OS=Mus musculus OX=10090 GN=Hbb-b1 PE=1 SV=2;sp|P02089|HBB2_MOUSE Hemoglobin subunit beta-2 OS=Mus musculus OX=10090 GN=Hbb-b2 PE=1 SV=2	3	11	11	11	11	11	11	10	9	9	10	10	9	11	10	10	11	11	11	10	9	9	10	10	9	11	10	10	11	11	11	10	9	9	10	10	9	11	10	10	70.7	70.7
Q921I1	Q921I1	39	39	39	Serotransferrin	Tf	sp|Q921I1|TRFE_MOUSE Serotransferrin OS=Mus musculus OX=10090 GN=Tf PE=1 SV=1	1	39	39	39	38	39	39	39	31	33	32	30	32	39	38	38	38	39	39	39	31	33	32	30	32	39	38	38	38	39	39	39	31	33	32	30	32	39	38	38	55.7	55.7
P47857	P47857	8	8	7	ATP-dependent 6-phosphofructokinase, muscle type	Pfkm	sp|P47857|PFKAM_MOUSE ATP-dependent 6-phosphofructokinase, muscle type OS=Mus musculus OX=10090 GN=Pfkm PE=1 SV=3	1	8	8	7	8	8	8	8	2	4	3	2	2	8	8	8	8	8	8	8	2	4	3	2	2	8	8	8	7	7	7	7	2	4	3	2	2	7	7	7	12.4	12.4
Q922D8	Q922D8	2	2	2	C-1-tetrahydrofolate synthase, cytoplasmic;Methylenetetrahydrofolate dehydrogenase;Methenyltetrahydrofolate cyclohydrolase;Formyltetrahydrofolate synthetase;C-1-tetrahydrofolate synthase, cytoplasmic, N-terminally processed	Mthfd1	sp|Q922D8|C1TC_MOUSE C-1-tetrahydrofolate synthase, cytoplasmic OS=Mus musculus OX=10090 GN=Mthfd1 PE=1 SV=4	1	2	2	2	2	2	2	2	0	2	0	1	0	2	2	2	2	2	2	2	0	2	0	1	0	2	2	2	2	2	2	2	0	2	0	1	0	2	2	2	2.6	2.6
P54071;O88844	P54071	11;1	11;1	11;1	Isocitrate dehydrogenase [NADP], mitochondrial	Idh2	sp|P54071|IDHP_MOUSE Isocitrate dehydrogenase [NADP], mitochondrial OS=Mus musculus OX=10090 GN=Idh2 PE=1 SV=3	2	11	11	11	10	11	11	11	9	6	8	5	7	11	11	11	10	11	11	11	9	6	8	5	7	11	11	11	10	11	11	11	9	6	8	5	7	11	11	11	27.7	27.7
Q63844	Q63844	7	7	5	Mitogen-activated protein kinase 3	Mapk3	sp|Q63844|MK03_MOUSE Mitogen-activated protein kinase 3 OS=Mus musculus OX=10090 GN=Mapk3 PE=1 SV=5	1	7	7	5	6	4	7	6	3	5	4	4	1	7	7	6	6	4	7	6	3	5	4	4	1	7	7	6	5	3	5	5	2	4	4	3	1	5	5	5	20.8	20.8
Q9DCD0	Q9DCD0	6	6	6	6-phosphogluconate dehydrogenase, decarboxylating	Pgd	sp|Q9DCD0|6PGD_MOUSE 6-phosphogluconate dehydrogenase, decarboxylating OS=Mus musculus OX=10090 GN=Pgd PE=1 SV=3	1	6	6	6	6	6	6	6	6	4	5	5	4	6	6	6	6	6	6	6	6	4	5	5	4	6	6	6	6	6	6	6	6	4	5	5	4	6	6	6	16.8	16.8
P15626	P15626	10	7	6	Glutathione S-transferase Mu 2	Gstm2	sp|P15626|GSTM2_MOUSE Glutathione S-transferase Mu 2 OS=Mus musculus OX=10090 GN=Gstm2 PE=1 SV=2	1	10	7	6	10	9	9	10	6	6	6	6	5	10	9	10	7	6	6	7	3	3	3	3	2	7	6	7	6	5	5	6	2	2	2	2	2	6	5	6	48.6	33
P17751	P17751	3	3	3	Triosephosphate isomerase	Tpi1	sp|P17751|TPIS_MOUSE Triosephosphate isomerase OS=Mus musculus OX=10090 GN=Tpi1 PE=1 SV=4	1	3	3	3	3	3	3	3	1	1	1	2	0	3	3	2	3	3	3	3	1	1	1	2	0	3	3	2	3	3	3	3	1	1	1	2	0	3	3	2	17.4	17.4
P16125	P16125	10	8	8	L-lactate dehydrogenase B chain	Ldhb	sp|P16125|LDHB_MOUSE L-lactate dehydrogenase B chain OS=Mus musculus OX=10090 GN=Ldhb PE=1 SV=2	1	10	8	8	9	8	7	8	4	5	5	4	5	8	8	8	8	7	6	7	2	3	3	2	3	7	7	6	8	7	6	7	2	3	3	2	3	7	7	6	33.2	27.8
P63101;O70456	P63101	8;1	8;1	7;0	14-3-3 protein zeta/delta	Ywhaz	sp|P63101|1433Z_MOUSE 14-3-3 protein zeta/delta OS=Mus musculus OX=10090 GN=Ywhaz PE=1 SV=1	2	8	8	7	8	8	8	7	6	4	4	5	3	6	6	5	8	8	8	7	6	4	4	5	3	6	6	5	7	7	7	6	5	3	3	4	2	5	6	5	43.3	43.3
P14152	P14152	6	6	6	Malate dehydrogenase, cytoplasmic	Mdh1	sp|P14152|MDHC_MOUSE Malate dehydrogenase, cytoplasmic OS=Mus musculus OX=10090 GN=Mdh1 PE=1 SV=3	1	6	6	6	6	6	6	5	3	5	4	5	4	5	5	5	6	6	6	5	3	5	4	5	4	5	5	5	6	6	6	5	3	5	4	5	4	5	5	5	21.3	21.3
P42932	P42932	3	3	3	T-complex protein 1 subunit theta	Cct8	sp|P42932|TCPQ_MOUSE T-complex protein 1 subunit theta OS=Mus musculus OX=10090 GN=Cct8 PE=1 SV=3	1	3	3	3	3	3	3	3	2	2	2	1	2	2	3	3	3	3	3	3	2	2	2	1	2	2	3	3	3	3	3	3	2	2	2	1	2	2	3	3	6.4	6.4
P06801	P06801	7	7	7	NADP-dependent malic enzyme	Me1	sp|P06801|MAOX_MOUSE NADP-dependent malic enzyme OS=Mus musculus OX=10090 GN=Me1 PE=1 SV=2	1	7	7	7	6	7	5	6	2	2	3	1	3	4	5	6	6	7	5	6	2	2	3	1	3	4	5	6	6	7	5	6	2	2	3	1	3	4	5	6	15.6	15.6
Q99KI0	Q99KI0	17	17	17	Aconitate hydratase, mitochondrial	Aco2	sp|Q99KI0|ACON_MOUSE Aconitate hydratase, mitochondrial OS=Mus musculus OX=10090 GN=Aco2 PE=1 SV=1	1	17	17	17	16	17	17	16	13	12	13	10	13	16	16	15	16	17	17	16	13	12	13	10	13	16	16	15	16	17	17	16	13	12	13	10	13	16	16	15	24.9	24.9
P68181	P68181	3	3	1	cAMP-dependent protein kinase catalytic subunit beta	Prkacb	sp|P68181|KAPCB_MOUSE cAMP-dependent protein kinase catalytic subunit beta OS=Mus musculus OX=10090 GN=Prkacb PE=1 SV=2	1	3	3	1	3	3	3	3	2	1	2	3	2	3	3	3	3	3	3	3	2	1	2	3	2	3	3	3	1	1	1	1	1	0	1	1	1	1	1	1	8.5	8.5
P06151;P00342	P06151	15;2	15;2	13;1	L-lactate dehydrogenase A chain	Ldha	sp|P06151|LDHA_MOUSE L-lactate dehydrogenase A chain OS=Mus musculus OX=10090 GN=Ldha PE=1 SV=3	2	15	15	13	13	13	13	13	10	11	11	10	10	14	13	15	13	13	13	13	10	11	11	10	10	14	13	15	12	12	12	12	8	9	9	8	8	13	12	13	44.6	44.6
Q8BWT1	Q8BWT1	5	5	5	3-ketoacyl-CoA thiolase, mitochondrial	Acaa2	sp|Q8BWT1|THIM_MOUSE 3-ketoacyl-CoA thiolase, mitochondrial OS=Mus musculus OX=10090 GN=Acaa2 PE=1 SV=3	1	5	5	5	5	5	4	5	3	2	4	3	2	5	5	5	5	5	4	5	3	2	4	3	2	5	5	5	5	5	4	5	3	2	4	3	2	5	5	5	22.4	22.4
P09103	P09103	2	2	2	Protein disulfide-isomerase	P4hb	sp|P09103|PDIA1_MOUSE Protein disulfide-isomerase OS=Mus musculus OX=10090 GN=P4hb PE=1 SV=2	1	2	2	2	2	2	2	2	1	1	2	1	1	2	2	2	2	2	2	2	1	1	2	1	1	2	2	2	2	2	2	2	1	1	2	1	1	2	2	2	4.7	4.7
Q8BH64	Q8BH64	8	8	7	EH domain-containing protein 2	Ehd2	sp|Q8BH64|EHD2_MOUSE EH domain-containing protein 2 OS=Mus musculus OX=10090 GN=Ehd2 PE=1 SV=1	1	8	8	7	7	8	8	7	2	2	3	2	2	7	7	7	7	8	8	7	2	2	3	2	2	7	7	7	6	7	7	6	1	1	3	1	1	6	6	6	13.4	13.4
P60766;P84096;Q8R527;Q9ER71	P60766	4;1;1;1	3;0;0;0	3;0;0;0	Cell division control protein 42 homolog	Cdc42	sp|P60766|CDC42_MOUSE Cell division control protein 42 homolog OS=Mus musculus OX=10090 GN=Cdc42 PE=1 SV=2	4	4	3	3	4	4	4	4	3	3	3	3	3	4	4	4	3	3	3	3	3	3	3	3	3	3	3	3	3	3	3	3	3	3	3	3	3	3	3	3	25.7	19.9
Q99JI6;P62835	Q99JI6;P62835	3;3	3;3	3;3	Ras-related protein Rap-1b;Ras-related protein Rap-1A	Rap1b;Rap1a	sp|Q99JI6|RAP1B_MOUSE Ras-related protein Rap-1b OS=Mus musculus OX=10090 GN=Rap1b PE=1 SV=2;sp|P62835|RAP1A_MOUSE Ras-related protein Rap-1A OS=Mus musculus OX=10090 GN=Rap1a PE=1 SV=1	2	3	3	3	3	3	3	3	1	2	0	1	0	3	3	3	3	3	3	3	1	2	0	1	0	3	3	3	3	3	3	3	1	2	0	1	0	3	3	3	12	12
P16015	P16015	4	4	4	Carbonic anhydrase 3	Ca3	sp|P16015|CAH3_MOUSE Carbonic anhydrase 3 OS=Mus musculus OX=10090 GN=Ca3 PE=1 SV=3	1	4	4	4	4	4	4	3	3	3	2	3	2	4	3	3	4	4	4	3	3	3	2	3	2	4	3	3	4	4	4	3	3	3	2	3	2	4	3	3	27.7	27.7
P07759;Q03734;Q91WP6;P29621;Q5I2A0;Q80X76	P07759	11;4;1;1;1;1	11;4;1;1;1;1	11;4;1;1;1;1	Serine protease inhibitor A3K	Serpina3k	sp|P07759|SPA3K_MOUSE Serine protease inhibitor A3K OS=Mus musculus OX=10090 GN=Serpina3k PE=1 SV=2	6	11	11	11	11	11	10	11	6	6	6	6	6	11	10	9	11	11	10	11	6	6	6	6	6	11	10	9	11	11	10	11	6	6	6	6	6	11	10	9	29.2	29.2
P47738	P47738	18	16	16	Aldehyde dehydrogenase, mitochondrial	Aldh2	sp|P47738|ALDH2_MOUSE Aldehyde dehydrogenase, mitochondrial OS=Mus musculus OX=10090 GN=Aldh2 PE=1 SV=1	1	18	16	16	16	15	15	14	12	13	11	13	10	16	14	13	14	13	13	12	11	11	9	11	8	14	12	11	14	13	13	12	11	11	9	11	8	14	12	11	44.5	43
P35700	P35700	7	7	7	Peroxiredoxin-1	Prdx1	sp|P35700|PRDX1_MOUSE Peroxiredoxin-1 OS=Mus musculus OX=10090 GN=Prdx1 PE=1 SV=1	1	7	7	7	7	7	7	7	5	5	4	4	6	7	7	7	7	7	7	7	5	5	4	4	6	7	7	7	7	7	7	7	5	5	4	4	6	7	7	7	37.2	37.2
Q9Z1Q5	Q9Z1Q5	3	3	3	Chloride intracellular channel protein 1	Clic1	sp|Q9Z1Q5|CLIC1_MOUSE Chloride intracellular channel protein 1 OS=Mus musculus OX=10090 GN=Clic1 PE=1 SV=3	1	3	3	3	2	2	2	2	2	2	2	1	2	2	3	2	2	2	2	2	2	2	2	1	2	2	3	2	2	2	2	2	2	2	2	1	2	2	3	2	12.4	12.4
P63001;Q05144;P60764	P63001;Q05144;P60764	6;3;3	6;3;3	5;2;2	Ras-related C3 botulinum toxin substrate 1;Ras-related C3 botulinum toxin substrate 2;Ras-related C3 botulinum toxin substrate 3	Rac1;Rac2;Rac3	sp|P63001|RAC1_MOUSE Ras-related C3 botulinum toxin substrate 1 OS=Mus musculus OX=10090 GN=Rac1 PE=1 SV=1;sp|Q05144|RAC2_MOUSE Ras-related C3 botulinum toxin substrate 2 OS=Mus musculus OX=10090 GN=Rac2 PE=1 SV=1;sp|P60764|RAC3_MOUSE Ras-related C3 botuli	3	6	6	5	6	6	6	6	4	4	2	4	4	6	6	6	6	6	6	6	4	4	2	4	4	6	6	6	5	5	5	5	4	4	2	4	4	5	5	5	36.5	36.5
Q61838	Q61838	36	36	36	Alpha-2-macroglobulin;Alpha-2-macroglobulin 165 kDa subunit;Alpha-2-macroglobulin 35 kDa subunit	A2m	sp|Q61838|PZP_MOUSE Pregnancy zone protein OS=Mus musculus OX=10090 GN=Pzp PE=1 SV=3	1	36	36	36	35	34	34	32	20	23	20	21	20	30	31	29	35	34	34	32	20	23	20	21	20	30	31	29	35	34	34	32	20	23	20	21	20	30	31	29	38.1	38.1
P05064;P05063;Q91Y97	P05064	14;2;1	14;2;1	14;2;1	Fructose-bisphosphate aldolase A	Aldoa	sp|P05064|ALDOA_MOUSE Fructose-bisphosphate aldolase A OS=Mus musculus OX=10090 GN=Aldoa PE=1 SV=2	3	14	14	14	13	13	13	13	7	8	9	7	9	12	13	13	13	13	13	13	7	8	9	7	9	12	13	13	13	13	13	13	7	8	9	7	9	12	13	13	54.1	54.1
P28665;P28666	P28665;P28666	21;12	21;12	21;12	Murinoglobulin-1;Murinoglobulin-2	Mug1;Mug2	sp|P28665|MUG1_MOUSE Murinoglobulin-1 OS=Mus musculus OX=10090 GN=Mug1 PE=1 SV=3;sp|P28666|MUG2_MOUSE Murinoglobulin-2 OS=Mus musculus OX=10090 GN=Mug2 PE=1 SV=2	2	21	21	21	21	21	20	18	12	17	12	13	16	19	18	19	21	21	20	18	12	17	12	13	16	19	18	19	21	21	20	18	12	17	12	13	16	19	18	19	16.9	16.9
P68254	P68254	4	3	3	14-3-3 protein theta	Ywhaq	sp|P68254|1433T_MOUSE 14-3-3 protein theta OS=Mus musculus OX=10090 GN=Ywhaq PE=1 SV=1	1	4	3	3	4	4	4	4	3	3	2	2	2	3	2	3	3	3	3	3	2	2	1	1	1	2	2	3	3	3	3	3	2	2	1	1	1	2	2	3	19.6	15.5
Q9JKF1	Q9JKF1	7	7	7	Ras GTPase-activating-like protein IQGAP1	Iqgap1	sp|Q9JKF1|IQGA1_MOUSE Ras GTPase-activating-like protein IQGAP1 OS=Mus musculus OX=10090 GN=Iqgap1 PE=1 SV=2	1	7	7	7	7	7	7	7	5	4	4	3	3	7	6	7	7	7	7	7	5	4	4	3	3	7	6	7	7	7	7	7	5	4	4	3	3	7	6	7	6.1	6.1
P50247	P50247	5	5	5	Adenosylhomocysteinase	Ahcy	sp|P50247|SAHH_MOUSE Adenosylhomocysteinase OS=Mus musculus OX=10090 GN=Ahcy PE=1 SV=3	1	5	5	5	5	4	5	5	2	3	3	2	2	5	5	5	5	4	5	5	2	3	3	2	2	5	5	5	5	4	5	5	2	3	3	2	2	5	5	5	15.5	15.5
P62259	P62259	4	3	3	14-3-3 protein epsilon	Ywhae	sp|P62259|1433E_MOUSE 14-3-3 protein epsilon OS=Mus musculus OX=10090 GN=Ywhae PE=1 SV=1	1	4	3	3	4	4	4	4	3	3	4	3	3	4	3	3	3	3	3	3	2	2	3	2	2	3	3	3	3	3	3	3	2	2	3	2	2	3	3	3	16.1	12.2
P45376	P45376	6	6	6	Aldose reductase	Akr1b1	sp|P45376|ALDR_MOUSE Aldo-keto reductase family 1 member B1 OS=Mus musculus OX=10090 GN=Akr1b1 PE=1 SV=3	1	6	6	6	6	6	6	4	4	5	4	2	4	5	5	5	6	6	6	4	4	5	4	2	4	5	5	5	6	6	6	4	4	5	4	2	4	5	5	5	21.5	21.5
P07901	P07901	19	9	9	Heat shock protein HSP 90-alpha	Hsp90aa1	sp|P07901|HS90A_MOUSE Heat shock protein HSP 90-alpha OS=Mus musculus OX=10090 GN=Hsp90aa1 PE=1 SV=4	1	19	9	9	18	18	18	18	9	11	10	10	12	18	16	16	8	9	9	9	2	3	3	3	4	9	7	6	8	9	9	9	2	3	3	3	4	9	7	6	26.6	14.3
P26041;P26043;P26040	P26041;P26043	16;8;7	16;8;7	16;8;7	Moesin;Radixin	Msn;Rdx	sp|P26041|MOES_MOUSE Moesin OS=Mus musculus OX=10090 GN=Msn PE=1 SV=3;sp|P26043|RADI_MOUSE Radixin OS=Mus musculus OX=10090 GN=Rdx PE=1 SV=3	3	16	16	16	15	16	16	15	11	11	11	10	9	15	15	14	15	16	16	15	11	11	11	10	9	15	15	14	15	16	16	15	11	11	11	10	9	15	15	14	25.8	25.8
P24527	P24527	6	6	6	Leukotriene A-4 hydrolase	Lta4h	sp|P24527|LKHA4_MOUSE Leukotriene A-4 hydrolase OS=Mus musculus OX=10090 GN=Lta4h PE=1 SV=4	1	6	6	6	5	4	5	6	2	3	2	1	4	6	5	6	5	4	5	6	2	3	2	1	4	6	5	6	5	4	5	6	2	3	2	1	4	6	5	6	11.6	11.6
Q9ERL9	Q9ERL9	2	2	2	Guanylate cyclase soluble subunit alpha-3	Gucy1a3	sp|Q9ERL9|GCYA1_MOUSE Guanylate cyclase soluble subunit alpha-1 OS=Mus musculus OX=10090 GN=Gucy1a1 PE=1 SV=2	1	2	2	2	2	2	2	2	1	2	1	1	2	2	2	2	2	2	2	2	1	2	1	1	2	2	2	2	2	2	2	2	1	2	1	1	2	2	2	2	4.1	4.1
P50516	P50516	2	2	2	V-type proton ATPase catalytic subunit A	Atp6v1a	sp|P50516|VATA_MOUSE V-type proton ATPase catalytic subunit A OS=Mus musculus OX=10090 GN=Atp6v1a PE=1 SV=2	1	2	2	2	2	2	2	2	1	1	2	1	2	2	2	2	2	2	2	2	1	1	2	1	2	2	2	2	2	2	2	2	1	1	2	1	2	2	2	2	3.4	3.4
Q922B2	Q922B2	3	3	3	Aspartate--tRNA ligase, cytoplasmic	Dars	sp|Q922B2|SYDC_MOUSE Aspartate--tRNA ligase, cytoplasmic OS=Mus musculus OX=10090 GN=Dars1 PE=1 SV=2	1	3	3	3	3	3	3	3	2	2	1	2	3	3	3	3	3	3	3	3	2	2	1	2	3	3	3	3	3	3	3	3	2	2	1	2	3	3	3	3	5.2	5.2
Q60854	Q60854	3	3	3	Serpin B6	Serpinb6	sp|Q60854|SPB6_MOUSE Serpin B6 OS=Mus musculus OX=10090 GN=Serpinb6 PE=1 SV=1	1	3	3	3	3	3	3	3	3	2	3	2	2	3	3	3	3	3	3	3	3	2	3	2	2	3	3	3	3	3	3	3	3	2	3	2	2	3	3	3	8.5	8.5
P40936	P40936	12	12	12	Indolethylamine N-methyltransferase	Inmt	sp|P40936|INMT_MOUSE Indolethylamine N-methyltransferase OS=Mus musculus OX=10090 GN=Inmt PE=1 SV=1	1	12	12	12	12	11	11	12	10	11	10	9	9	12	10	11	12	11	11	12	10	11	10	9	9	12	10	11	12	11	11	12	10	11	10	9	9	12	10	11	55.3	55.3
Q9WVA4;Q9R1Q8	Q9WVA4	3;1	3;1	3;1	Transgelin-2	Tagln2	sp|Q9WVA4|TAGL2_MOUSE Transgelin-2 OS=Mus musculus OX=10090 GN=Tagln2 PE=1 SV=4	2	3	3	3	3	3	3	3	2	3	2	3	1	3	3	3	3	3	3	3	2	3	2	3	1	3	3	3	3	3	3	3	2	3	2	3	1	3	3	3	15.6	15.6
P97447	P97447	4	4	4	Four and a half LIM domains protein 1	Fhl1	sp|P97447|FHL1_MOUSE Four and a half LIM domains protein 1 OS=Mus musculus OX=10090 GN=Fhl1 PE=1 SV=3	1	4	4	4	4	3	3	3	3	3	2	2	2	3	3	3	4	3	3	3	3	3	2	2	2	3	3	3	4	3	3	3	3	3	2	2	2	3	3	3	17.5	17.5
P70168	P70168	3	3	3	Importin subunit beta-1	Kpnb1	sp|P70168|IMB1_MOUSE Importin subunit beta-1 OS=Mus musculus OX=10090 GN=Kpnb1 PE=1 SV=2	1	3	3	3	3	3	3	3	3	2	1	2	2	3	3	3	3	3	3	3	3	2	1	2	2	3	3	3	3	3	3	3	3	2	1	2	2	3	3	3	4.8	4.8
P08074	P08074	12	12	12	Carbonyl reductase [NADPH] 2	Cbr2	sp|P08074|CBR2_MOUSE Carbonyl reductase [NADPH] 2 OS=Mus musculus OX=10090 GN=Cbr2 PE=1 SV=1	1	12	12	12	10	11	11	11	7	7	8	8	8	11	10	10	10	11	11	11	7	7	8	8	8	11	10	10	10	11	11	11	7	7	8	8	8	11	10	10	59	59
Q9Z1Q9	Q9Z1Q9	3	3	3	Valine--tRNA ligase	Vars	sp|Q9Z1Q9|SYVC_MOUSE Valine--tRNA ligase OS=Mus musculus OX=10090 GN=Vars1 PE=1 SV=1	1	3	3	3	3	3	3	3	2	3	1	2	2	3	2	3	3	3	3	3	2	3	1	2	2	3	2	3	3	3	3	3	2	3	1	2	2	3	2	3	2.9	2.9
Q9DCW4	Q9DCW4	2	2	2	Electron transfer flavoprotein subunit beta	Etfb	sp|Q9DCW4|ETFB_MOUSE Electron transfer flavoprotein subunit beta OS=Mus musculus OX=10090 GN=Etfb PE=1 SV=3	1	2	2	2	2	2	2	2	2	2	2	2	1	2	2	2	2	2	2	2	2	2	2	2	1	2	2	2	2	2	2	2	2	2	2	2	1	2	2	2	12.2	12.2
Q99KC8	Q99KC8	3	3	3	von Willebrand factor A domain-containing protein 5A	Vwa5a	sp|Q99KC8|VMA5A_MOUSE von Willebrand factor A domain-containing protein 5A OS=Mus musculus OX=10090 GN=Vwa5a PE=1 SV=2	1	3	3	3	2	3	2	3	2	1	1	1	0	3	3	2	2	3	2	3	2	1	1	1	0	3	3	2	2	3	2	3	2	1	1	1	0	3	3	2	4.9	4.9
Q60597	Q60597	7	7	7	2-oxoglutarate dehydrogenase, mitochondrial	Ogdh	sp|Q60597|ODO1_MOUSE 2-oxoglutarate dehydrogenase, mitochondrial OS=Mus musculus OX=10090 GN=Ogdh PE=1 SV=3	1	7	7	7	7	6	6	7	2	3	5	5	4	7	5	7	7	6	6	7	2	3	5	5	4	7	5	7	7	6	6	7	2	3	5	5	4	7	5	7	8.4	8.4
P58252;O08810	P58252	11;1	11;1	11;1	Elongation factor 2	Eef2	sp|P58252|EF2_MOUSE Elongation factor 2 OS=Mus musculus OX=10090 GN=Eef2 PE=1 SV=2	2	11	11	11	11	11	11	10	7	7	7	7	7	9	10	9	11	11	11	10	7	7	7	7	7	9	10	9	11	11	11	10	7	7	7	7	7	9	10	9	14	14
Q9JM76	Q9JM76	2	2	2	Actin-related protein 2/3 complex subunit 3	Arpc3	sp|Q9JM76|ARPC3_MOUSE Actin-related protein 2/3 complex subunit 3 OS=Mus musculus OX=10090 GN=Arpc3 PE=1 SV=3	1	2	2	2	2	2	2	2	0	0	2	0	1	2	1	1	2	2	2	2	0	0	2	0	1	2	1	1	2	2	2	2	0	0	2	0	1	2	1	1	10.1	10.1
P08249	P08249	5	5	5	Malate dehydrogenase, mitochondrial	Mdh2	sp|P08249|MDHM_MOUSE Malate dehydrogenase, mitochondrial OS=Mus musculus OX=10090 GN=Mdh2 PE=1 SV=3	1	5	5	5	5	5	5	5	3	2	1	4	2	4	5	5	5	5	5	5	3	2	1	4	2	4	5	5	5	5	5	5	3	2	1	4	2	4	5	5	19.8	19.8
P02535;Q8VCW2	P02535	6;1	6;1	4;0	Keratin, type I cytoskeletal 10	Krt10	sp|P02535|K1C10_MOUSE Keratin, type I cytoskeletal 10 OS=Mus musculus OX=10090 GN=Krt10 PE=1 SV=3	2	6	6	4	3	3	3	5	3	3	3	2	2	5	6	6	3	3	3	5	3	3	3	2	2	5	6	6	2	2	2	3	2	3	2	1	2	3	4	4	10.7	10.7
P57780;Q7TPR4;Q9JI91;O88990	P57780;Q7TPR4	8;4;2;1	8;4;2;1	8;4;2;1	Alpha-actinin-4;Alpha-actinin-1	Actn4;Actn1	sp|P57780|ACTN4_MOUSE Alpha-actinin-4 OS=Mus musculus OX=10090 GN=Actn4 PE=1 SV=1;sp|Q7TPR4|ACTN1_MOUSE Alpha-actinin-1 OS=Mus musculus OX=10090 GN=Actn1 PE=1 SV=1	4	8	8	8	8	8	7	8	5	4	4	4	5	8	8	8	8	8	7	8	5	4	4	4	5	8	8	8	8	8	7	8	5	4	4	4	5	8	8	8	11.7	11.7
Q64727	Q64727	17	17	17	Vinculin	Vcl	sp|Q64727|VINC_MOUSE Vinculin OS=Mus musculus OX=10090 GN=Vcl PE=1 SV=4	1	17	17	17	16	17	16	17	10	12	9	13	13	14	13	12	16	17	16	17	10	12	9	13	13	14	13	12	16	17	16	17	10	12	9	13	13	14	13	12	19.7	19.7
Q61171	Q61171	6	6	6	Peroxiredoxin-2	Prdx2	sp|Q61171|PRDX2_MOUSE Peroxiredoxin-2 OS=Mus musculus OX=10090 GN=Prdx2 PE=1 SV=3	1	6	6	6	5	6	6	6	2	4	2	4	3	6	6	6	5	6	6	6	2	4	2	4	3	6	6	6	5	6	6	6	2	4	2	4	3	6	6	6	31.8	31.8
Q9WUB3;Q9ET01	Q9WUB3	16;3	16;3	11;1	Glycogen phosphorylase, muscle form	Pygm	sp|Q9WUB3|PYGM_MOUSE Glycogen phosphorylase, muscle form OS=Mus musculus OX=10090 GN=Pygm PE=1 SV=3	2	16	16	11	15	16	16	14	12	12	9	11	9	15	13	15	15	16	16	14	12	12	9	11	9	15	13	15	10	11	11	10	9	9	6	7	6	11	9	11	22.8	22.8
Q9D0F9	Q9D0F9	3	3	3	Phosphoglucomutase-1	Pgm1	sp|Q9D0F9|PGM1_MOUSE Phosphoglucomutase-1 OS=Mus musculus OX=10090 GN=Pgm1 PE=1 SV=4	1	3	3	3	2	2	2	3	1	2	1	2	1	2	3	3	2	2	2	3	1	2	1	2	1	2	3	3	2	2	2	3	1	2	1	2	1	2	3	3	7.7	7.7
Q6ZQ38	Q6ZQ38	4	4	4	Cullin-associated NEDD8-dissociated protein 1	Cand1	sp|Q6ZQ38|CAND1_MOUSE Cullin-associated NEDD8-dissociated protein 1 OS=Mus musculus OX=10090 GN=Cand1 PE=1 SV=2	1	4	4	4	4	4	4	4	3	2	2	3	1	4	4	4	4	4	4	4	3	2	2	3	1	4	4	4	4	4	4	4	3	2	2	3	1	4	4	4	3.6	3.6
P01942;P06467	P01942	7;1	7;1	7;1	Hemoglobin subunit alpha	Hba	sp|P01942|HBA_MOUSE Hemoglobin subunit alpha OS=Mus musculus OX=10090 GN=Hba PE=1 SV=2	2	7	7	7	7	7	7	7	7	7	7	7	7	7	7	7	7	7	7	7	7	7	7	7	7	7	7	7	7	7	7	7	7	7	7	7	7	7	7	7	62.7	62.7
O08709	O08709	10	10	10	Peroxiredoxin-6	Prdx6	sp|O08709|PRDX6_MOUSE Peroxiredoxin-6 OS=Mus musculus OX=10090 GN=Prdx6 PE=1 SV=3	1	10	10	10	9	9	9	9	9	10	9	10	10	10	10	9	9	9	9	9	9	10	9	10	10	10	10	9	9	9	9	9	9	10	9	10	10	10	10	9	49.1	49.1
P40142	P40142	22	22	22	Transketolase	Tkt	sp|P40142|TKT_MOUSE Transketolase OS=Mus musculus OX=10090 GN=Tkt PE=1 SV=1	1	22	22	22	22	21	20	18	10	14	15	12	11	20	18	16	22	21	20	18	10	14	15	12	11	20	18	16	22	21	20	18	10	14	15	12	11	20	18	16	42.9	42.9
P11499	P11499	21	21	10	Heat shock protein HSP 90-beta	Hsp90ab1	sp|P11499|HS90B_MOUSE Heat shock protein HSP 90-beta OS=Mus musculus OX=10090 GN=Hsp90ab1 PE=1 SV=3	1	21	21	10	19	19	20	20	14	13	13	14	14	20	19	21	19	19	20	20	14	13	13	14	14	20	19	21	8	9	10	10	7	5	6	7	6	10	9	10	29.3	29.3
Q8BTM8;Q80X90;Q8VHX6	Q8BTM8	27;2;2	27;2;2	27;2;2	Filamin-A	Flna	sp|Q8BTM8|FLNA_MOUSE Filamin-A OS=Mus musculus OX=10090 GN=Flna PE=1 SV=5	3	27	27	27	24	24	24	25	17	21	21	21	21	25	25	23	24	24	24	25	17	21	21	21	21	25	25	23	24	24	24	25	17	21	21	21	21	25	25	23	14.5	14.5
Q8CIB5	Q8CIB5	7	7	7	Fermitin family homolog 2	Fermt2	sp|Q8CIB5|FERM2_MOUSE Fermitin family homolog 2 OS=Mus musculus OX=10090 GN=Fermt2 PE=1 SV=1	1	7	7	7	6	7	7	6	4	4	4	4	3	6	6	6	6	7	7	6	4	4	4	4	3	6	6	6	6	7	7	6	4	4	4	4	3	6	6	6	11.3	11.3
P04117	P04117	2	2	2	Fatty acid-binding protein, adipocyte	Fabp4	sp|P04117|FABP4_MOUSE Fatty acid-binding protein, adipocyte OS=Mus musculus OX=10090 GN=Fabp4 PE=1 SV=3	1	2	2	2	2	2	2	2	2	2	2	2	2	2	2	2	2	2	2	2	2	2	2	2	2	2	2	2	2	2	2	2	2	2	2	2	2	2	2	2	17.4	17.4
Q00896;P07758	Q00896;P07758	10;10	10;10	4;4	Alpha-1-antitrypsin 1-3;Alpha-1-antitrypsin 1-1	Serpina1c;Serpina1a	sp|Q00896|A1AT3_MOUSE Alpha-1-antitrypsin 1-3 OS=Mus musculus OX=10090 GN=Serpina1c PE=1 SV=2;sp|P07758|A1AT1_MOUSE Alpha-1-antitrypsin 1-1 OS=Mus musculus OX=10090 GN=Serpina1a PE=1 SV=4	2	10	10	4	9	7	10	10	7	7	7	7	8	8	9	10	9	7	10	10	7	7	7	7	8	8	9	10	3	3	4	4	3	4	4	3	4	4	4	4	31.6	31.6
Q00519;G3X982;Q3TYQ9	Q00519	8;1;1	8;1;1	8;1;1	Xanthine dehydrogenase/oxidase;Xanthine dehydrogenase;Xanthine oxidase	Xdh	sp|Q00519|XDH_MOUSE Xanthine dehydrogenase/oxidase OS=Mus musculus OX=10090 GN=Xdh PE=1 SV=5	3	8	8	8	8	8	8	8	4	4	4	2	3	7	7	6	8	8	8	8	4	4	4	2	3	7	7	6	8	8	8	8	4	4	4	2	3	7	7	6	6.4	6.4
P05202	P05202	6	6	6	Aspartate aminotransferase, mitochondrial	Got2	sp|P05202|AATM_MOUSE Aspartate aminotransferase, mitochondrial OS=Mus musculus OX=10090 GN=Got2 PE=1 SV=1	1	6	6	6	5	6	6	6	3	4	3	3	5	6	6	6	5	6	6	6	3	4	3	3	5	6	6	6	5	6	6	6	3	4	3	3	5	6	6	6	17.2	17.2
Q8CI94	Q8CI94	8	3	3	Glycogen phosphorylase, brain form	Pygb	sp|Q8CI94|PYGB_MOUSE Glycogen phosphorylase, brain form OS=Mus musculus OX=10090 GN=Pygb PE=1 SV=3	1	8	3	3	7	7	8	7	6	5	5	7	5	7	6	7	2	2	3	3	3	2	2	3	2	3	2	3	2	2	3	3	3	2	2	3	2	3	2	3	10.8	3.9
P07309	P07309	2	2	2	Transthyretin	Ttr	sp|P07309|TTHY_MOUSE Transthyretin OS=Mus musculus OX=10090 GN=Ttr PE=1 SV=1	1	2	2	2	2	2	2	2	2	2	2	2	2	2	2	2	2	2	2	2	2	2	2	2	2	2	2	2	2	2	2	2	2	2	2	2	2	2	2	2	15	15
Q91V92	Q91V92	17	17	17	ATP-citrate synthase	Acly	sp|Q91V92|ACLY_MOUSE ATP-citrate synthase OS=Mus musculus OX=10090 GN=Acly PE=1 SV=1	1	17	17	17	17	17	17	15	12	10	9	9	9	16	14	14	17	17	17	15	12	10	9	9	9	16	14	14	17	17	17	15	12	10	9	9	9	16	14	14	19.2	19.2
Q00898	Q00898	8	4	3	Alpha-1-antitrypsin 1-5	Serpina1e	sp|Q00898|A1AT5_MOUSE Alpha-1-antitrypsin 1-5 OS=Mus musculus OX=10090 GN=Serpina1e PE=1 SV=1	1	8	4	3	8	7	8	8	5	5	4	6	6	6	7	8	4	4	4	4	2	3	2	3	3	4	4	4	3	3	3	3	2	2	2	2	2	3	3	3	24.5	12.3
P01027	P01027	31	31	31	Complement C3;Complement C3 beta chain;C3-beta-c;Complement C3 alpha chain;C3a anaphylatoxin;Acylation stimulating protein;Complement C3b alpha chain;Complement C3c alpha chain fragment 1;Complement C3dg fragment;Complement C3g fragment;Complement C3d fragment;Complement C3f fragment;Complement C3c alpha chain fragment 2	C3	sp|P01027|CO3_MOUSE Complement C3 OS=Mus musculus OX=10090 GN=C3 PE=1 SV=3	1	31	31	31	25	29	29	28	23	21	21	23	22	29	27	29	25	29	29	28	23	21	21	23	22	29	27	29	25	29	29	28	23	21	21	23	22	29	27	29	21.7	21.7
Q93092	Q93092	4	4	4	Transaldolase	Taldo1	sp|Q93092|TALDO_MOUSE Transaldolase OS=Mus musculus OX=10090 GN=Taldo1 PE=1 SV=2	1	4	4	4	4	3	3	4	1	3	3	3	1	4	4	4	4	3	3	4	1	3	3	3	1	4	4	4	4	3	3	4	1	3	3	3	1	4	4	4	12.2	12.2
Q60710	Q60710	5	5	5	Deoxynucleoside triphosphate triphosphohydrolase SAMHD1	Samhd1	sp|Q60710|SAMH1_MOUSE Deoxynucleoside triphosphate triphosphohydrolase SAMHD1 OS=Mus musculus OX=10090 GN=Samhd1 PE=1 SV=3	1	5	5	5	5	4	5	4	1	3	2	3	2	4	3	4	5	4	5	4	1	3	2	3	2	4	3	4	5	4	5	4	1	3	2	3	2	4	3	4	10.6	10.6
P40124	P40124	8	8	8	Adenylyl cyclase-associated protein 1	Cap1	sp|P40124|CAP1_MOUSE Adenylyl cyclase-associated protein 1 OS=Mus musculus OX=10090 GN=Cap1 PE=1 SV=4	1	8	8	8	8	8	8	8	4	4	6	4	3	7	7	7	8	8	8	8	4	4	6	4	3	7	7	7	8	8	8	8	4	4	6	4	3	7	7	7	21.7	21.7
P09411;P09041	P09411	3;1	3;1	3;1	Phosphoglycerate kinase 1	Pgk1	sp|P09411|PGK1_MOUSE Phosphoglycerate kinase 1 OS=Mus musculus OX=10090 GN=Pgk1 PE=1 SV=4	2	3	3	3	3	2	3	3	3	3	3	3	3	3	3	3	3	2	3	3	3	3	3	3	3	3	3	3	3	2	3	3	3	3	3	3	3	3	3	3	12	12
O08553;P97427	O08553	11;1	11;1	11;1	Dihydropyrimidinase-related protein 2	Dpysl2	sp|O08553|DPYL2_MOUSE Dihydropyrimidinase-related protein 2 OS=Mus musculus OX=10090 GN=Dpysl2 PE=1 SV=2	2	11	11	11	11	11	11	11	5	5	5	6	7	11	10	11	11	11	11	11	5	5	5	6	7	11	10	11	11	11	11	11	5	5	5	6	7	11	10	11	27.4	27.4
Q9R0P5	Q9R0P5	3	3	3	Destrin	Dstn	sp|Q9R0P5|DEST_MOUSE Destrin OS=Mus musculus OX=10090 GN=Dstn PE=1 SV=3	1	3	3	3	3	3	3	3	2	2	2	2	2	3	3	3	3	3	3	3	2	2	2	2	2	3	3	3	3	3	3	3	2	2	2	2	2	3	3	3	21.8	21.8
P17182;P21550;P17183	P17182	6;2;2	5;1;1	5;1;1	Alpha-enolase	Eno1	sp|P17182|ENOA_MOUSE Alpha-enolase OS=Mus musculus OX=10090 GN=Eno1 PE=1 SV=3	3	6	5	5	5	5	5	4	4	3	4	4	2	5	6	5	5	5	5	4	3	2	3	3	1	4	5	4	5	5	5	4	3	2	3	3	1	4	5	4	16.4	15
Q99MN9	Q99MN9	10	10	10	Propionyl-CoA carboxylase beta chain, mitochondrial	Pccb	sp|Q99MN9|PCCB_MOUSE Propionyl-CoA carboxylase beta chain, mitochondrial OS=Mus musculus OX=10090 GN=Pccb PE=1 SV=2	1	10	10	10	10	9	10	9	6	5	6	6	5	10	10	10	10	9	10	9	6	5	6	6	5	10	10	10	10	9	10	9	6	5	6	6	5	10	10	10	24	24
P00920	P00920	10	10	10	Carbonic anhydrase 2	Ca2	sp|P00920|CAH2_MOUSE Carbonic anhydrase 2 OS=Mus musculus OX=10090 GN=Ca2 PE=1 SV=4	1	10	10	10	10	10	10	10	7	7	7	7	6	10	9	10	10	10	10	10	7	7	7	7	6	10	9	10	10	10	10	10	7	7	7	7	6	10	9	10	59.2	59.2
Q8VEK3	Q8VEK3	4	4	4	Heterogeneous nuclear ribonucleoprotein U	Hnrnpu	sp|Q8VEK3|HNRPU_MOUSE Heterogeneous nuclear ribonucleoprotein U OS=Mus musculus OX=10090 GN=Hnrnpu PE=1 SV=1	1	4	4	4	4	4	4	4	2	2	2	2	2	4	4	4	4	4	4	4	2	2	2	2	2	4	4	4	4	4	4	4	2	2	2	2	2	4	4	4	6.8	6.8
P62827;Q61820	P62827	4;1	4;1	4;1	GTP-binding nuclear protein Ran	Ran	sp|P62827|RAN_MOUSE GTP-binding nuclear protein Ran OS=Mus musculus OX=10090 GN=Ran PE=1 SV=3	2	4	4	4	4	4	4	4	3	3	3	3	2	4	3	4	4	4	4	4	3	3	3	3	2	4	3	4	4	4	4	4	3	3	3	3	2	4	3	4	23.1	23.1
P26039;Q71LX4	P26039	30;6	30;6	30;6	Talin-1	Tln1	sp|P26039|TLN1_MOUSE Talin-1 OS=Mus musculus OX=10090 GN=Tln1 PE=1 SV=2	2	30	30	30	30	29	28	29	15	19	16	18	18	28	29	27	30	29	28	29	15	19	16	18	18	28	29	27	30	29	28	29	15	19	16	18	18	28	29	27	16.5	16.5
P63017;P17156;P20029;P16627;Q61696;P17879	P63017;P17156	12;7;2;2;1;1	12;7;2;2;1;1	12;7;2;2;1;1	Heat shock cognate 71 kDa protein;Heat shock-related 70 kDa protein 2	Hspa8;Hspa2	sp|P63017|HSP7C_MOUSE Heat shock cognate 71 kDa protein OS=Mus musculus OX=10090 GN=Hspa8 PE=1 SV=1;sp|P17156|HSP72_MOUSE Heat shock-related 70 kDa protein 2 OS=Mus musculus OX=10090 GN=Hspa2 PE=1 SV=2	6	12	12	12	12	12	11	12	7	10	8	7	7	12	10	12	12	12	11	12	7	10	8	7	7	12	10	12	12	12	11	12	7	10	8	7	7	12	10	12	23.8	23.8
P22629	P22629	3	3	3			sp|P22629|SAV_STRAV Streptavidin OS=Streptomyces avidinii PE=1 SV=1	1	3	3	3	2	1	2	1	3	3	3	2	3	1	2	1	2	1	2	1	3	3	3	2	3	1	2	1	2	1	2	1	3	3	3	2	3	1	2	1	26.7	26.7
Q9WVK4;Q9QXY6	Q9WVK4	6;2	5;2	5;2	EH domain-containing protein 1	Ehd1	sp|Q9WVK4|EHD1_MOUSE EH domain-containing protein 1 OS=Mus musculus OX=10090 GN=Ehd1 PE=1 SV=1	2	6	5	5	6	6	5	5	4	3	3	5	4	6	5	5	5	5	4	4	3	2	3	4	3	5	4	4	5	5	4	4	3	2	3	4	3	5	4	4	13.7	12
P50405	P50405	3	3	3	Pulmonary surfactant-associated protein B	Sftpb	sp|P50405|PSPB_MOUSE Pulmonary surfactant-associated protein B OS=Mus musculus OX=10090 GN=Sftpb PE=1 SV=1	1	3	3	3	2	3	3	3	2	2	2	2	2	3	3	3	2	3	3	3	2	2	2	2	2	3	3	3	2	3	3	3	2	2	2	2	2	3	3	3	7.4	7.4
Q68FD5	Q68FD5	6	6	6	Clathrin heavy chain 1	Cltc	sp|Q68FD5|CLH1_MOUSE Clathrin heavy chain 1 OS=Mus musculus OX=10090 GN=Cltc PE=1 SV=3	1	6	6	6	5	5	5	6	2	1	2	3	1	6	5	5	5	5	5	6	2	1	2	3	1	6	5	5	5	5	5	6	2	1	2	3	1	6	5	5	5.4	5.4
Q8BG05	Q8BG05	2	2	2	Heterogeneous nuclear ribonucleoprotein A3	Hnrnpa3	sp|Q8BG05|ROA3_MOUSE Heterogeneous nuclear ribonucleoprotein A3 OS=Mus musculus OX=10090 GN=Hnrnpa3 PE=1 SV=1	1	2	2	2	2	2	2	2	2	1	2	2	1	2	2	2	2	2	2	2	2	1	2	2	1	2	2	2	2	2	2	2	2	1	2	2	1	2	2	2	7.4	7.4
P17563;Q63836	P17563;Q63836	12;11	12;11	12;11	Selenium-binding protein 1;Selenium-binding protein 2	Selenbp1;Selenbp2	sp|P17563|SBP1_MOUSE Methanethiol oxidase OS=Mus musculus OX=10090 GN=Selenbp1 PE=1 SV=2;sp|Q63836|SBP2_MOUSE Selenium-binding protein 2 OS=Mus musculus OX=10090 GN=Selenbp2 PE=1 SV=2	2	12	12	12	10	12	10	11	10	10	10	11	11	11	10	10	10	12	10	11	10	10	10	11	11	11	10	10	10	12	10	11	10	10	10	11	11	11	10	10	34.7	34.7
Q6IFZ6	Q6IFZ6	3	1	0	Keratin, type II cytoskeletal 1b	Krt77	sp|Q6IFZ6|K2C1B_MOUSE Keratin, type II cytoskeletal 1b OS=Mus musculus OX=10090 GN=Krt77 PE=1 SV=1	1	3	1	0	2	2	2	3	2	3	3	2	2	3	3	3	1	1	1	1	1	1	1	1	1	1	1	1	0	0	0	0	0	0	0	0	0	0	0	0	5.1	1.7
P47911	P47911	4	4	4	60S ribosomal protein L6	Rpl6	sp|P47911|RL6_MOUSE 60S ribosomal protein L6 OS=Mus musculus OX=10090 GN=Rpl6 PE=1 SV=3	1	4	4	4	2	2	2	3	4	4	4	4	4	3	3	2	2	2	2	3	4	4	4	4	4	3	3	2	2	2	2	3	4	4	4	4	4	3	3	2	13.2	13.2
P12970	P12970	3	3	3	60S ribosomal protein L7a	Rpl7a	sp|P12970|RL7A_MOUSE 60S ribosomal protein L7a OS=Mus musculus OX=10090 GN=Rpl7a PE=1 SV=2	1	3	3	3	1	1	2	2	1	1	2	2	2	3	3	3	1	1	2	2	1	1	2	2	2	3	3	3	1	1	2	2	1	1	2	2	2	3	3	3	9.4	9.4
P07310	P07310	4	4	4	Creatine kinase M-type	Ckm	sp|P07310|KCRM_MOUSE Creatine kinase M-type OS=Mus musculus OX=10090 GN=Ckm PE=1 SV=1	1	4	4	4	3	3	3	3	2	2	3	2	2	3	4	3	3	3	3	3	2	2	3	2	2	3	4	3	3	3	3	3	2	2	3	2	2	3	4	3	13.6	13.6
C0HKE6;Q8CGP5;C0HKE2;C0HKE3;C0HKE4;C0HKE5;C0HKE7;C0HKE9;C0HKE8;C0HKE1;Q8CGP6;Q8BFU2;Q8CGP7;Q8R1M2;Q64523;Q6GSS7;P0C0S6;Q3THW5;P27661;Q64522	C0HKE6;Q8CGP5;C0HKE2;C0HKE3;C0HKE4;C0HKE5;C0HKE7;C0HKE9;C0HKE8;C0HKE1;Q8CGP6;Q8BFU2;Q8CGP7;Q8R1M2;Q64523;Q6GSS7;P0C0S6;Q3THW5;P27661	3;3;3;3;3;3;3;3;3;3;3;3;3;3;3;3;2;2;2;1	3;3;3;3;3;3;3;3;3;3;3;3;3;3;3;3;2;2;2;1	3;3;3;3;3;3;3;3;3;3;3;3;3;3;3;3;2;2;2;1	Histone H2A type 1-F;Histone H2A type 1-H;Histone H2A type 3;Histone H2A type 1-K;Histone H2A.J;Histone H2A type 2-C;Histone H2A type 2-A;Histone H2A.Z;Histone H2A.V;Histone H2AX	Hist1h2af;Hist1h2ah;Hist3h2a;Hist1h2ak;H2afj;Hist2h2ac;Hist2h2aa1;H2afz;H2afv;H2afx	sp|C0HKE6|H2A1I_MOUSE Histone H2A type 1-I OS=Mus musculus OX=10090 GN=H2ac13 PE=1 SV=1;sp|Q8CGP5|H2A1F_MOUSE Histone H2A type 1-F OS=Mus musculus OX=10090 GN=Hist1h2af PE=1 SV=3;sp|C0HKE2|H2A1C_MOUSE Histone H2A type 1-C OS=Mus musculus OX=10090 GN=H2ac6	20	3	3	3	3	3	3	3	3	3	3	3	3	2	3	3	3	3	3	3	3	3	3	3	3	2	3	3	3	3	3	3	3	3	3	3	3	2	3	3	26.9	26.9
P04104;Q6IFZ9;Q9R0H5;Q6NXH9	P04104;Q6IFZ9;Q9R0H5;Q6NXH9	4;2;2;2	4;2;2;2	2;0;0;0	Keratin, type II cytoskeletal 1;Keratin, type II cytoskeletal 74;Keratin, type II cytoskeletal 71;Keratin, type II cytoskeletal 73	Krt1;Krt74;Krt71;Krt73	sp|P04104|K2C1_MOUSE Keratin, type II cytoskeletal 1 OS=Mus musculus OX=10090 GN=Krt1 PE=1 SV=4;sp|Q6IFZ9|K2C74_MOUSE Keratin, type II cytoskeletal 74 OS=Mus musculus OX=10090 GN=Krt74 PE=3 SV=1;sp|Q9R0H5|K2C71_MOUSE Keratin, type II cytoskeletal 71 OS=Mus	4	4	4	2	3	1	2	4	1	4	3	2	2	4	4	4	3	1	2	4	1	4	3	2	2	4	4	4	2	0	1	2	0	2	1	1	1	2	2	2	4.9	4.9
Q8VCC1	Q8VCC1	7	7	7	15-hydroxyprostaglandin dehydrogenase [NAD(+)]	Hpgd	sp|Q8VCC1|PGDH_MOUSE 15-hydroxyprostaglandin dehydrogenase [NAD(+)] OS=Mus musculus OX=10090 GN=Hpgd PE=1 SV=1	1	7	7	7	5	6	6	6	6	7	6	6	6	7	7	7	5	6	6	6	6	7	6	6	6	7	7	7	5	6	6	6	6	7	6	6	6	7	7	7	31.6	31.6
P68433;P84244;P02301;P84228	P68433;P84244;P02301;P84228	3;3;3;3	3;3;3;3	3;3;3;3	Histone H3.1;Histone H3.3;Histone H3.3C;Histone H3.2	Hist1h3a;H3f3a;H3f3c;Hist1h3b	sp|P68433|H31_MOUSE Histone H3.1 OS=Mus musculus OX=10090 GN=H3c1 PE=1 SV=2;sp|P84244|H33_MOUSE Histone H3.3 OS=Mus musculus OX=10090 GN=H3-3a PE=1 SV=2;sp|P02301|H3C_MOUSE Histone H3.3C OS=Mus musculus OX=10090 GN=H3-5 PE=3 SV=3;sp|P84228|H32_MOUSE Histon	4	3	3	3	2	3	3	3	2	2	1	3	1	2	3	3	2	3	3	3	2	2	1	3	1	2	3	3	2	3	3	3	2	2	1	3	1	2	3	3	16.9	16.9
P62806	P62806	4	4	4	Histone H4	Hist1h4a	sp|P62806|H4_MOUSE Histone H4 OS=Mus musculus OX=10090 GN=H4c1 PE=1 SV=2	1	4	4	4	4	4	4	4	4	4	4	4	4	4	4	4	4	4	4	4	4	4	4	4	4	4	4	4	4	4	4	4	4	4	4	4	4	4	4	4	40.8	40.8
P02701	P02701	17	17	17			sp|P02701|AVID_CHICK Avidin OS=Gallus gallus GN=AVD PE=1 SV=3	1	17	17	17	17	17	17	17	15	15	15	15	17	15	15	17	17	17	17	17	15	15	15	15	17	15	15	17	17	17	17	17	15	15	15	15	17	15	15	17	71.1	71.1
P62754	P62754	3	3	3	40S ribosomal protein S6	Rps6	sp|P62754|RS6_MOUSE 40S ribosomal protein S6 OS=Mus musculus OX=10090 GN=Rps6 PE=1 SV=1	1	3	3	3	3	3	2	3	3	3	3	3	3	3	3	3	3	3	2	3	3	3	3	3	3	3	3	3	3	3	2	3	3	3	3	3	3	3	3	3	12.9	12.9
Q91ZA3	Q91ZA3	44	44	44	Propionyl-CoA carboxylase alpha chain, mitochondrial	Pcca	sp|Q91ZA3|PCCA_MOUSE Propionyl-CoA carboxylase alpha chain, mitochondrial OS=Mus musculus OX=10090 GN=Pcca PE=1 SV=2	1	44	44	44	43	42	43	43	42	41	41	40	37	42	42	43	43	42	43	43	42	41	41	40	37	42	42	43	43	42	43	43	42	41	41	40	37	42	42	43	63.7	63.7
Q05920	Q05920	52	52	52	Pyruvate carboxylase, mitochondrial	Pc	sp|Q05920|PYC_MOUSE Pyruvate carboxylase, mitochondrial OS=Mus musculus OX=10090 GN=Pc PE=1 SV=1	1	52	52	52	51	52	52	52	50	49	50	50	49	52	50	51	51	52	52	52	50	49	50	50	49	52	50	51	51	52	52	52	50	49	50	50	49	52	50	51	59	59
P00761	P00761	6	6	6			sp|P00761|TRYP_PIG Trypsin OS=Sus scrofa PE=1 SV=1	1	6	6	6	6	5	6	5	6	5	4	5	5	5	5	5	6	5	6	5	6	5	4	5	5	5	5	5	6	5	6	5	6	5	4	5	5	5	5	5	25.1	25.1
Q99MR8	Q99MR8	14	14	14	Methylcrotonoyl-CoA carboxylase subunit alpha, mitochondrial	Mccc1	sp|Q99MR8|MCCA_MOUSE Methylcrotonoyl-CoA carboxylase subunit alpha, mitochondrial OS=Mus musculus OX=10090 GN=Mccc1 PE=1 SV=2	1	14	14	14	13	11	13	11	12	12	13	13	13	12	12	12	13	11	13	11	12	12	13	13	13	12	12	12	13	11	13	11	12	12	13	13	13	12	12	12	24.4	24.4
P00924	P00924	16	16	15	Enolase 1	ENO1	sp|P00924|ENO1_YEAST Enolase 1 OS=Saccharomyces cerevisiae (strain ATCC 204508 / S288c) GN=ENO1 PE=1 SV=3	1	16	16	15	15	15	15	15	16	16	16	15	16	16	15	15	15	15	15	15	16	16	16	15	16	16	15	15	15	15	15	15	15	15	15	14	15	15	14	14	44.4	44.4
P15864;P43275;Q07133	P15864	7;2;2	7;2;2	2;0;0	Histone H1.2	Hist1h1c	sp|P15864|H12_MOUSE Histone H1.2 OS=Mus musculus OX=10090 GN=H1-2 PE=1 SV=2	3	7	7	2	6	6	6	6	6	5	6	7	7	7	7	7	6	6	6	6	6	5	6	7	7	7	7	7	1	1	1	1	1	1	2	2	2	2	2	2	26.9	26.9
P43274	P43274	7	3	3	Histone H1.4	Hist1h1e	sp|P43274|H14_MOUSE Histone H1.4 OS=Mus musculus OX=10090 GN=H1-4 PE=1 SV=2	1	7	3	3	7	7	7	7	7	7	7	7	7	7	7	7	3	3	3	3	3	3	3	3	3	3	3	3	3	3	3	3	3	3	3	3	3	3	3	3	22.8	13.2
E9Q4Z2	E9Q4Z2	35	24	24	Acetyl-CoA carboxylase 2;Biotin carboxylase	Acacb	sp|E9Q4Z2|ACACB_MOUSE Acetyl-CoA carboxylase 2 OS=Mus musculus OX=10090 GN=Acacb PE=1 SV=1	1	35	24	24	27	26	26	25	32	31	34	32	31	25	28	25	16	15	15	14	21	21	23	21	21	15	18	14	16	15	15	14	21	21	23	21	21	15	18	14	17.8	12.1
Q5SWU9;Q9ER41	Q5SWU9	88;1	88;1	77;1	Acetyl-CoA carboxylase 1;Biotin carboxylase	Acaca	sp|Q5SWU9|ACACA_MOUSE Acetyl-CoA carboxylase 1 OS=Mus musculus OX=10090 GN=Acaca PE=1 SV=1	2	88	88	77	83	85	83	82	81	80	83	81	82	80	80	83	83	85	83	82	81	80	83	81	82	80	80	83	72	74	72	71	70	70	72	70	72	70	70	72	45.4	45.4
Q9Z1Q2	Q9Z1Q2	1	1	1	Abhydrolase domain-containing protein 16A	Abhd16a	sp|Q9Z1Q2|ABHGA_MOUSE Phosphatidylserine lipase ABHD16A OS=Mus musculus OX=10090 GN=Abhd16a PE=1 SV=3	1	1	1	1	1	0	0	0	0	0	0	0	0	1	1	1	1	0	0	0	0	0	0	0	0	1	1	1	1	0	0	0	0	0	0	0	0	1	1	1	1.6	1.6
Q8VD66	Q8VD66	2	2	2	Abhydrolase domain-containing protein 4	Abhd4	sp|Q8VD66|ABHD4_MOUSE (Lyso)-N-acylphosphatidylethanolamine lipase OS=Mus musculus OX=10090 GN=Abhd4 PE=1 SV=1	1	2	2	2	1	1	1	1	0	0	0	0	0	2	2	2	1	1	1	1	0	0	0	0	0	2	2	2	1	1	1	1	0	0	0	0	0	2	2	2	5.6	5.6
P50544	P50544	2	2	2	Very long-chain specific acyl-CoA dehydrogenase, mitochondrial	Acadvl	sp|P50544|ACADV_MOUSE Very long-chain specific acyl-CoA dehydrogenase, mitochondrial OS=Mus musculus OX=10090 GN=Acadvl PE=1 SV=3	1	2	2	2	2	1	1	2	0	0	0	0	0	2	1	2	2	1	1	2	0	0	0	0	0	2	1	2	2	1	1	2	0	0	0	0	0	2	1	2	3.2	3.2
P60710	P60710	18	1	1	Actin, cytoplasmic 1;Actin, cytoplasmic 1, N-terminally processed	Actb	sp|P60710|ACTB_MOUSE Actin, cytoplasmic 1 OS=Mus musculus OX=10090 GN=Actb PE=1 SV=1	1	18	1	1	17	17	18	18	14	13	15	14	15	17	18	18	1	1	1	1	1	1	1	1	1	1	1	1	1	1	1	1	1	1	1	1	1	1	1	1	68.5	4.5
Q8BFZ3	Q8BFZ3	6	1	1	Beta-actin-like protein 2	Actbl2	sp|Q8BFZ3|ACTBL_MOUSE Beta-actin-like protein 2 OS=Mus musculus OX=10090 GN=Actbl2 PE=1 SV=1	1	6	1	1	5	5	5	5	4	3	3	4	5	5	6	5	0	0	0	0	0	0	0	0	0	0	1	0	0	0	0	0	0	0	0	0	0	0	1	0	23.9	4.8
P61161	P61161	1	1	1	Actin-related protein 2	Actr2	sp|P61161|ARP2_MOUSE Actin-related protein 2 OS=Mus musculus OX=10090 GN=Actr2 PE=1 SV=1	1	1	1	1	1	1	1	1	0	0	0	1	0	1	1	1	1	1	1	1	0	0	0	1	0	1	1	1	1	1	1	1	0	0	0	1	0	1	1	1	3.6	3.6
P54822	P54822	1	1	1	Adenylosuccinate lyase	Adsl	sp|P54822|PUR8_MOUSE Adenylosuccinate lyase OS=Mus musculus OX=10090 GN=Adsl PE=1 SV=2	1	1	1	1	1	1	1	1	1	1	1	1	1	1	1	1	1	1	1	1	1	1	1	1	1	1	1	1	1	1	1	1	1	1	1	1	1	1	1	1	2.3	2.3
Q9JII6	Q9JII6	2	2	2	Alcohol dehydrogenase [NADP(+)]	Akr1a1	sp|Q9JII6|AK1A1_MOUSE Aldo-keto reductase family 1 member A1 OS=Mus musculus OX=10090 GN=Akr1a1 PE=1 SV=3	1	2	2	2	2	2	1	1	1	2	1	1	0	2	1	1	2	2	1	1	1	2	1	1	0	2	1	1	2	2	1	1	1	2	1	1	0	2	1	1	6.8	6.8
O35945	O35945	13	2	2	Aldehyde dehydrogenase, cytosolic 1	Aldh1a7	sp|O35945|AL1A7_MOUSE Aldehyde dehydrogenase, cytosolic 1 OS=Mus musculus OX=10090 GN=Aldh1a7 PE=1 SV=1	1	13	2	2	12	13	12	12	10	9	8	9	10	12	12	12	1	2	1	1	0	0	0	0	0	1	1	1	1	2	1	1	0	0	0	0	0	1	1	1	26.1	6.6
Q9JLJ2	Q9JLJ2	2	2	2	4-trimethylaminobutyraldehyde dehydrogenase	Aldh9a1	sp|Q9JLJ2|AL9A1_MOUSE 4-trimethylaminobutyraldehyde dehydrogenase OS=Mus musculus OX=10090 GN=Aldh9a1 PE=1 SV=1	1	2	2	2	2	2	2	2	0	0	0	1	0	2	2	2	2	2	2	2	0	0	0	1	0	2	2	2	2	2	2	2	0	0	0	1	0	2	2	2	4.5	4.5
Q99PT1	Q99PT1	1	1	1	Rho GDP-dissociation inhibitor 1	Arhgdia	sp|Q99PT1|GDIR1_MOUSE Rho GDP-dissociation inhibitor 1 OS=Mus musculus OX=10090 GN=Arhgdia PE=1 SV=3	1	1	1	1	1	1	1	1	1	1	1	1	1	1	1	1	1	1	1	1	1	1	1	1	1	1	1	1	1	1	1	1	1	1	1	1	1	1	1	1	7.8	7.8
Q9WV32	Q9WV32	2	2	2	Actin-related protein 2/3 complex subunit 1B	Arpc1b	sp|Q9WV32|ARC1B_MOUSE Actin-related protein 2/3 complex subunit 1B OS=Mus musculus OX=10090 GN=Arpc1b PE=1 SV=4	1	2	2	2	2	2	2	2	1	1	2	2	2	2	2	2	2	2	2	2	1	1	2	2	2	2	2	2	2	2	2	2	1	1	2	2	2	2	2	2	7.5	7.5
P59999	P59999	1	1	1	Actin-related protein 2/3 complex subunit 4	Arpc4	sp|P59999|ARPC4_MOUSE Actin-related protein 2/3 complex subunit 4 OS=Mus musculus OX=10090 GN=Arpc4 PE=1 SV=3	1	1	1	1	1	1	1	1	1	0	0	0	0	1	1	1	1	1	1	1	1	0	0	0	0	1	1	1	1	1	1	1	1	0	0	0	0	1	1	1	6.5	6.5
Q923D2	Q923D2	1	1	1	Flavin reductase (NADPH)	Blvrb	sp|Q923D2|BLVRB_MOUSE Flavin reductase (NADPH) OS=Mus musculus OX=10090 GN=Blvrb PE=1 SV=3	1	1	1	1	1	1	1	1	1	1	1	1	1	1	1	1	1	1	1	1	1	1	1	1	1	1	1	1	1	1	1	1	1	1	1	1	1	1	1	1	8.3	8.3
P15327	P15327	1	1	1	Bisphosphoglycerate mutase	Bpgm	sp|P15327|PMGE_MOUSE Bisphosphoglycerate mutase OS=Mus musculus OX=10090 GN=Bpgm PE=1 SV=2	1	1	1	1	1	1	1	1	1	1	0	0	1	1	1	1	1	1	1	1	1	1	0	0	1	1	1	1	1	1	1	1	1	1	0	0	1	1	1	1	3.9	3.9
Q8BH35	Q8BH35	1	1	1	Complement component C8 beta chain	C8b	sp|Q8BH35|CO8B_MOUSE Complement component C8 beta chain OS=Mus musculus OX=10090 GN=C8b PE=1 SV=1	1	1	1	1	0	0	1	1	0	0	0	0	0	1	1	1	0	0	1	1	0	0	0	0	0	1	1	1	0	0	1	1	0	0	0	0	0	1	1	1	2.2	2.2
P24270	P24270	1	1	1	Catalase	Cat	sp|P24270|CATA_MOUSE Catalase OS=Mus musculus OX=10090 GN=Cat PE=1 SV=4	1	1	1	1	1	1	1	1	1	1	1	1	1	1	1	1	1	1	1	1	1	1	1	1	1	1	1	1	1	1	1	1	1	1	1	1	1	1	1	1	2.5	2.5
Q04447	Q04447	1	1	1	Creatine kinase B-type	Ckb	sp|Q04447|KCRB_MOUSE Creatine kinase B-type OS=Mus musculus OX=10090 GN=Ckb PE=1 SV=1	1	1	1	1	1	1	1	1	0	0	0	0	0	1	1	1	1	1	1	1	0	0	0	0	0	1	1	1	1	1	1	1	0	0	0	0	0	1	1	1	2.9	2.9
P10605	P10605	1	1	1	Cathepsin B;Cathepsin B light chain;Cathepsin B heavy chain	Ctsb	sp|P10605|CATB_MOUSE Cathepsin B OS=Mus musculus OX=10090 GN=Ctsb PE=1 SV=2	1	1	1	1	0	0	0	0	0	0	0	0	0	0	0	1	0	0	0	0	0	0	0	0	0	0	0	1	0	0	0	0	0	0	0	0	0	0	0	1	5	5
Q9WUU7	Q9WUU7	1	1	1	Cathepsin Z	Ctsz	sp|Q9WUU7|CATZ_MOUSE Cathepsin Z OS=Mus musculus OX=10090 GN=Ctsz PE=1 SV=1	1	1	1	1	1	1	1	1	0	0	0	0	0	1	1	1	1	1	1	1	0	0	0	0	0	1	1	1	1	1	1	1	0	0	0	0	0	1	1	1	3.3	3.3
Q61656;Q501J6	Q61656;Q501J6	1;1	1;1	1;1	Probable ATP-dependent RNA helicase DDX5;Probable ATP-dependent RNA helicase DDX17	Ddx5;Ddx17	sp|Q61656|DDX5_MOUSE Probable ATP-dependent RNA helicase DDX5 OS=Mus musculus OX=10090 GN=Ddx5 PE=1 SV=2;sp|Q501J6|DDX17_MOUSE Probable ATP-dependent RNA helicase DDX17 OS=Mus musculus OX=10090 GN=Ddx17 PE=1 SV=1	2	1	1	1	1	0	1	0	0	0	0	0	0	1	1	1	1	0	1	0	0	0	0	0	0	1	1	1	1	0	1	0	0	0	0	0	0	1	1	1	2	2
P42125	P42125	1	1	1	Enoyl-CoA delta isomerase 1, mitochondrial	Eci1	sp|P42125|ECI1_MOUSE Enoyl-CoA delta isomerase 1, mitochondrial OS=Mus musculus OX=10090 GN=Eci1 PE=1 SV=2	1	1	1	1	1	1	1	0	0	1	1	1	1	0	0	0	1	1	1	0	0	1	1	1	1	0	0	0	1	1	1	0	0	1	1	1	1	0	0	0	4.5	4.5
Q8K2I3	Q8K2I3	1	1	1	Dimethylaniline monooxygenase [N-oxide-forming] 2	Fmo2	sp|Q8K2I3|FMO2_MOUSE Dimethylaniline monooxygenase [N-oxide-forming] 2 OS=Mus musculus OX=10090 GN=Fmo2 PE=1 SV=3	1	1	1	1	0	1	1	1	1	0	1	0	0	1	1	1	0	1	1	1	1	0	1	0	0	1	1	1	0	1	1	1	1	0	1	0	0	1	1	1	1.9	1.9
Q8BSD4	Q8BSD4	1	1	1	Gap junction delta-4 protein	Gjd4	sp|Q8BSD4|CXD4_MOUSE Gap junction delta-4 protein OS=Mus musculus OX=10090 GN=Gjd4 PE=2 SV=1	1	1	1	1	0	1	1	0	0	0	0	1	1	0	1	1	0	1	1	0	0	0	0	1	1	0	1	1	0	1	1	0	0	0	0	1	1	0	1	1	3	3
Q9JL62	Q9JL62	1	1	1	Glycolipid transfer protein	Gltp	sp|Q9JL62|GLTP_MOUSE Glycolipid transfer protein OS=Mus musculus OX=10090 GN=Gltp PE=1 SV=3	1	1	1	1	1	1	1	1	0	0	0	0	1	1	1	1	1	1	1	1	0	0	0	0	1	1	1	1	1	1	1	1	0	0	0	0	1	1	1	1	7.2	7.2
P13020	P13020	1	1	1	Gelsolin	Gsn	sp|P13020|GELS_MOUSE Gelsolin OS=Mus musculus OX=10090 GN=Gsn PE=1 SV=3	1	1	1	1	1	1	1	1	1	0	1	1	1	1	1	1	1	1	1	1	1	0	1	1	1	1	1	1	1	1	1	1	1	0	1	1	1	1	1	1	1.7	1.7
P19639	P19639	4	1	1	Glutathione S-transferase Mu 3	Gstm3	sp|P19639|GSTM3_MOUSE Glutathione S-transferase Mu 3 OS=Mus musculus OX=10090 GN=Gstm3 PE=1 SV=2	1	4	1	1	3	4	3	2	2	2	2	2	2	2	2	2	0	1	0	0	0	0	0	0	0	0	0	0	0	1	0	0	0	0	0	0	0	0	0	0	20.6	6
Q9WVL0	Q9WVL0	2	2	2	Maleylacetoacetate isomerase	Gstz1	sp|Q9WVL0|MAAI_MOUSE Maleylacetoacetate isomerase OS=Mus musculus OX=10090 GN=Gstz1 PE=1 SV=1	1	2	2	2	2	2	2	2	0	0	0	0	0	1	2	0	2	2	2	2	0	0	0	0	0	1	2	0	2	2	2	2	0	0	0	0	0	1	2	0	11.6	11.6
O54865	O54865	2	2	2	Guanylate cyclase soluble subunit beta-1	Gucy1b3	sp|O54865|GCYB1_MOUSE Guanylate cyclase soluble subunit beta-1 OS=Mus musculus OX=10090 GN=Gucy1b1 PE=1 SV=1	1	2	2	2	2	2	2	1	0	0	0	0	1	2	1	1	2	2	2	1	0	0	0	0	1	2	1	1	2	2	2	1	0	0	0	0	1	2	1	1	3.7	3.7
Q6ZWY9;Q64478;P10853;P10854;Q64475;Q64525;Q9D2U9;Q8CGP2;Q8CGP1;P70696;Q8CGP0;Q64524	Q6ZWY9;Q64478;P10853;P10854;Q64475;Q64525;Q9D2U9;Q8CGP2;Q8CGP1;P70696;Q8CGP0;Q64524	1;1;1;1;1;1;1;1;1;1;1;1	1;1;1;1;1;1;1;1;1;1;1;1	1;1;1;1;1;1;1;1;1;1;1;1	Histone H2B type 1-C/E/G;Histone H2B type 1-H;Histone H2B type 1-F/J/L;Histone H2B type 1-M;Histone H2B type 1-B;Histone H2B type 2-B;Histone H2B type 3-A;Histone H2B type 1-P;Histone H2B type 1-K;Histone H2B type 1-A;Histone H2B type 3-B;Histone H2B type 2-E	Hist1h2bc;Hist1h2bh;Hist1h2bf;Hist1h2bm;Hist1h2bb;Hist2h2bb;Hist3h2ba;Hist1h2bp;Hist1h2bk;Hist1h2ba;Hist3h2bb;Hist2h2be	sp|Q6ZWY9|H2B1C_MOUSE Histone H2B type 1-C/E/G OS=Mus musculus OX=10090 GN=H2bc4 PE=1 SV=3;sp|Q64478|H2B1H_MOUSE Histone H2B type 1-H OS=Mus musculus OX=10090 GN=H2bc9 PE=1 SV=3;sp|P10853|H2B1F_MOUSE Histone H2B type 1-F/J/L OS=Mus musculus OX=10090 GN=H2b	12	1	1	1	1	1	1	1	1	1	1	1	1	1	1	1	1	1	1	1	1	1	1	1	1	1	1	1	1	1	1	1	1	1	1	1	1	1	1	1	7.1	7.1
O88569	O88569	1	1	1	Heterogeneous nuclear ribonucleoproteins A2/B1	Hnrnpa2b1	sp|O88569|ROA2_MOUSE Heterogeneous nuclear ribonucleoproteins A2/B1 OS=Mus musculus OX=10090 GN=Hnrnpa2b1 PE=1 SV=2	1	1	1	1	1	0	1	1	0	0	1	0	0	1	1	1	1	0	1	1	0	0	1	0	0	1	1	1	1	0	1	1	0	0	1	0	0	1	1	1	2.8	2.8
P14602	P14602	1	1	1	Heat shock protein beta-1	Hspb1	sp|P14602|HSPB1_MOUSE Heat shock protein beta-1 OS=Mus musculus OX=10090 GN=Hspb1 PE=1 SV=3	1	1	1	1	1	1	1	1	0	0	0	0	0	1	1	0	1	1	1	1	0	0	0	0	0	1	1	0	1	1	1	1	0	0	0	0	0	1	1	0	4.8	4.8
P70404	P70404	1	1	1	Isocitrate dehydrogenase [NAD] subunit gamma 1, mitochondrial	Idh3g	sp|P70404|IDHG1_MOUSE Isocitrate dehydrogenase [NAD] subunit gamma 1, mitochondrial OS=Mus musculus OX=10090 GN=Idh3g PE=1 SV=1	1	1	1	1	1	1	1	1	0	0	0	0	0	1	1	1	1	1	1	1	0	0	0	0	0	1	1	1	1	1	1	1	0	0	0	0	0	1	1	1	5.9	5.9
P28738;Q61768;P33175	P28738;Q61768;P33175	2;2;2	2;2;2	2;2;2	Kinesin heavy chain isoform 5C;Kinesin-1 heavy chain;Kinesin heavy chain isoform 5A	Kif5c;Kif5b;Kif5a	sp|P28738|KIF5C_MOUSE Kinesin heavy chain isoform 5C OS=Mus musculus OX=10090 GN=Kif5c PE=1 SV=3;sp|Q61768|KINH_MOUSE Kinesin-1 heavy chain OS=Mus musculus OX=10090 GN=Kif5b PE=1 SV=3;sp|P33175|KIF5A_MOUSE Kinesin heavy chain isoform 5A OS=Mus musculus OX=	3	2	2	2	2	2	2	1	1	1	1	1	1	2	2	2	2	2	2	1	1	1	1	1	1	2	2	2	2	2	2	1	1	1	1	1	1	2	2	2	2.4	2.4
Q9Z2K1;Q61781;Q61414;P19001;Q9QWL7;Q9D312;Q8CCX5	Q9Z2K1;Q61781;Q61414	3;2;2;1;1;1;1	2;1;1;1;1;1;1	1;0;0;0;0;0;0	Keratin, type I cytoskeletal 16;Keratin, type I cytoskeletal 14;Keratin, type I cytoskeletal 15	Krt16;Krt14;Krt15	sp|Q9Z2K1|K1C16_MOUSE Keratin, type I cytoskeletal 16 OS=Mus musculus OX=10090 GN=Krt16 PE=1 SV=3;sp|Q61781|K1C14_MOUSE Keratin, type I cytoskeletal 14 OS=Mus musculus OX=10090 GN=Krt14 PE=1 SV=2;sp|Q61414|K1C15_MOUSE Keratin, type I cytoskeletal 15 OS=Mus	7	3	2	1	2	1	1	1	1	0	1	1	1	1	1	3	1	0	0	0	0	0	1	0	1	0	0	2	0	0	0	0	0	0	1	0	1	0	0	1	6.2	4.3
Q3TTY5	Q3TTY5	2	1	1	Keratin, type II cytoskeletal 2 epidermal	Krt2	sp|Q3TTY5|K22E_MOUSE Keratin, type II cytoskeletal 2 epidermal OS=Mus musculus OX=10090 GN=Krt2 PE=1 SV=1	1	2	1	1	0	0	0	1	0	1	2	0	0	1	2	2	0	0	0	0	0	0	1	0	0	0	1	1	0	0	0	0	0	0	1	0	0	0	1	1	2.3	1.3
Q9Z320	Q9Z320	2	1	1	Keratin, type I cytoskeletal 27	Krt27	sp|Q9Z320|K1C27_MOUSE Keratin, type I cytoskeletal 27 OS=Mus musculus OX=10090 GN=Krt27 PE=1 SV=1	1	2	1	1	1	2	2	2	1	0	0	1	0	2	2	2	0	1	1	1	0	0	0	0	0	1	1	1	0	1	1	1	0	0	0	0	0	1	1	1	4.5	2.5
Q6IFX2	Q6IFX2	2	1	1	Keratin, type I cytoskeletal 42	Krt42	sp|Q6IFX2|K1C42_MOUSE Keratin, type I cytoskeletal 42 OS=Mus musculus OX=10090 GN=Krt42 PE=1 SV=1	1	2	1	1	1	0	0	0	0	0	0	0	0	0	0	2	0	0	0	0	0	0	0	0	0	0	0	1	0	0	0	0	0	0	0	0	0	0	0	1	4.6	2.7
Q922U2;P11679;P50446;Q8BGZ7;Q9Z331;Q9DCV7;P07744;Q99M73;Q6IME9	Q922U2;P11679;P50446;Q8BGZ7;Q9Z331	3;2;2;2;2;1;1;1;1	1;0;1;1;1;0;0;0;0	1;0;1;1;1;0;0;0;0	Keratin, type II cytoskeletal 5;Keratin, type II cytoskeletal 8;Keratin, type II cytoskeletal 6A;Keratin, type II cytoskeletal 75;Keratin, type II cytoskeletal 6B	Krt5;Krt8;Krt6a;Krt75;Krt6b	sp|Q922U2|K2C5_MOUSE Keratin, type II cytoskeletal 5 OS=Mus musculus OX=10090 GN=Krt5 PE=1 SV=1;sp|P11679|K2C8_MOUSE Keratin, type II cytoskeletal 8 OS=Mus musculus OX=10090 GN=Krt8 PE=1 SV=4;sp|P50446|K2C6A_MOUSE Keratin, type II cytoskeletal 6A OS=Mus mu	9	3	1	1	2	2	2	3	2	2	3	2	1	2	3	3	1	1	1	1	1	0	1	1	0	0	1	1	1	1	1	1	1	0	1	1	0	0	1	1	5	2.1
Q8VED5	Q8VED5	3	1	1	Keratin, type II cytoskeletal 79	Krt79	sp|Q8VED5|K2C79_MOUSE Keratin, type II cytoskeletal 79 OS=Mus musculus OX=10090 GN=Krt79 PE=1 SV=2	1	3	1	1	1	1	1	2	1	2	2	1	1	3	3	3	0	0	0	0	0	0	0	0	0	1	1	1	0	0	0	0	0	0	0	0	0	1	1	1	5.5	2.3
P19137	P19137	1	1	1	Laminin subunit alpha-1	Lama1	sp|P19137|LAMA1_MOUSE Laminin subunit alpha-1 OS=Mus musculus OX=10090 GN=Lama1 PE=1 SV=2	1	1	1	1	1	0	0	1	1	1	1	1	0	1	1	0	1	0	0	1	1	1	1	1	0	1	1	0	1	0	0	1	1	1	1	1	0	1	1	0	0.4	0.4
Q99JW4	Q99JW4	1	1	1	LIM and senescent cell antigen-like-containing domain protein 1	Lims1	sp|Q99JW4|LIMS1_MOUSE LIM and senescent cell antigen-like-containing domain protein 1 OS=Mus musculus OX=10090 GN=Lims1 PE=1 SV=3	1	1	1	1	1	1	1	1	1	1	1	1	0	1	1	1	1	1	1	1	1	1	1	1	0	1	1	1	1	1	1	1	1	1	1	1	0	1	1	1	3.7	3.7
Q8BHA1	Q8BHA1	1	1	1	Leucine-rich repeat-containing protein 24	Lrrc24	sp|Q8BHA1|LRC24_MOUSE Leucine-rich repeat-containing protein 24 OS=Mus musculus OX=10090 GN=Lrrc24 PE=2 SV=1	1	1	1	1	1	1	1	1	1	1	1	1	1	1	1	1	1	1	1	1	1	1	1	1	1	1	1	1	1	1	1	1	1	1	1	1	1	1	1	1	1.9	1.9
P51885	P51885	1	1	1	Lumican	Lum	sp|P51885|LUM_MOUSE Lumican OS=Mus musculus OX=10090 GN=Lum PE=1 SV=2	1	1	1	1	1	1	1	1	0	0	0	0	0	1	1	1	1	1	1	1	0	0	0	0	0	1	1	1	1	1	1	1	0	0	0	0	0	1	1	1	2.4	2.4
P63085;Q61532;Q6P5G0	P63085	3;1;1	1;0;0	1;0;0	Mitogen-activated protein kinase 1	Mapk1	sp|P63085|MK01_MOUSE Mitogen-activated protein kinase 1 OS=Mus musculus OX=10090 GN=Mapk1 PE=1 SV=3	3	3	1	1	2	2	3	2	1	1	0	1	0	3	3	2	1	1	1	1	0	0	0	0	0	1	1	1	1	1	1	1	0	0	0	0	0	1	1	1	9.8	4.5
Q3TEW6	Q3TEW6	1	1	1	Myelin protein zero-like protein 1	Mpzl1	sp|Q3TEW6|MPZL1_MOUSE Myelin protein zero-like protein 1 OS=Mus musculus OX=10090 GN=Mpzl1 PE=1 SV=1	1	1	1	1	1	0	0	1	1	1	0	1	1	1	1	1	1	0	0	1	1	1	0	1	1	1	1	1	1	0	0	1	1	1	0	1	1	1	1	1	3.7	3.7
Q9CQT1	Q9CQT1	1	1	1	Methylthioribose-1-phosphate isomerase	Mri1	sp|Q9CQT1|MTNA_MOUSE Methylthioribose-1-phosphate isomerase OS=Mus musculus OX=10090 GN=Mri1 PE=1 SV=1	1	1	1	1	1	0	1	0	0	0	1	0	0	0	1	0	1	0	1	0	0	0	1	0	0	0	1	0	1	0	1	0	0	0	1	0	0	0	1	0	3	3
Q8BLF1	Q8BLF1	1	1	1	Neutral cholesterol ester hydrolase 1	Nceh1	sp|Q8BLF1|NCEH1_MOUSE Neutral cholesterol ester hydrolase 1 OS=Mus musculus OX=10090 GN=Nceh1 PE=1 SV=1	1	1	1	1	1	1	1	1	0	0	0	0	0	1	1	1	1	1	1	1	0	0	0	0	0	1	1	1	1	1	1	1	0	0	0	0	0	1	1	1	2.9	2.9
Q61990	Q61990	2	1	1	Poly(rC)-binding protein 2	Pcbp2	sp|Q61990|PCBP2_MOUSE Poly(rC)-binding protein 2 OS=Mus musculus OX=10090 GN=Pcbp2 PE=1 SV=1	1	2	1	1	2	2	2	2	0	0	0	0	0	2	2	2	1	1	1	1	0	0	0	0	0	1	1	1	1	1	1	1	0	0	0	0	0	1	1	1	6.6	3.6
P35486	P35486	1	1	1	Pyruvate dehydrogenase E1 component subunit alpha, somatic form, mitochondrial	Pdha1	sp|P35486|ODPA_MOUSE Pyruvate dehydrogenase E1 component subunit alpha, somatic form, mitochondrial OS=Mus musculus OX=10090 GN=Pdha1 PE=1 SV=1	1	1	1	1	1	1	1	1	0	0	0	0	0	1	1	1	1	1	1	1	0	0	0	0	0	1	1	1	1	1	1	1	0	0	0	0	0	1	1	1	3.3	3.3
Q9DBJ1;O70250	Q9DBJ1;O70250	1;1	1;1	1;1	Phosphoglycerate mutase 1;Phosphoglycerate mutase 2	Pgam1;Pgam2	sp|Q9DBJ1|PGAM1_MOUSE Phosphoglycerate mutase 1 OS=Mus musculus OX=10090 GN=Pgam1 PE=1 SV=3;sp|O70250|PGAM2_MOUSE Phosphoglycerate mutase 2 OS=Mus musculus OX=10090 GN=Pgam2 PE=1 SV=3	2	1	1	1	1	1	1	1	1	1	1	1	1	1	1	1	1	1	1	1	1	1	1	1	1	1	1	1	1	1	1	1	1	1	1	1	1	1	1	1	4.3	4.3
Q7TSV4	Q7TSV4	1	1	1	Phosphoglucomutase-2	Pgm2	sp|Q7TSV4|PGM2_MOUSE Phosphoglucomutase-2 OS=Mus musculus OX=10090 GN=Pgm2 PE=1 SV=1	1	1	1	1	1	1	1	1	1	1	1	1	1	1	1	1	1	1	1	1	1	1	1	1	1	1	1	1	1	1	1	1	1	1	1	1	1	1	1	1	1.8	1.8
Q62009	Q62009	1	1	1	Periostin	Postn	sp|Q62009|POSTN_MOUSE Periostin OS=Mus musculus OX=10090 GN=Postn PE=1 SV=2	1	1	1	1	1	1	1	1	0	0	0	0	0	1	1	1	1	1	1	1	0	0	0	0	0	1	1	1	1	1	1	1	0	0	0	0	0	1	1	1	2.3	2.3
Q8BVQ5	Q8BVQ5	1	1	1	Protein phosphatase methylesterase 1	Ppme1	sp|Q8BVQ5|PPME1_MOUSE Protein phosphatase methylesterase 1 OS=Mus musculus OX=10090 GN=Ppme1 PE=1 SV=5	1	1	1	1	1	1	1	1	0	0	0	0	0	1	1	1	1	1	1	1	0	0	0	0	0	1	1	1	1	1	1	1	0	0	0	0	0	1	1	1	6	6
P63330;P62715	P63330;P62715	1;1	1;1	1;1	Serine/threonine-protein phosphatase 2A catalytic subunit alpha isoform;Serine/threonine-protein phosphatase 2A catalytic subunit beta isoform	Ppp2ca;Ppp2cb	sp|P63330|PP2AA_MOUSE Serine/threonine-protein phosphatase 2A catalytic subunit alpha isoform OS=Mus musculus OX=10090 GN=Ppp2ca PE=1 SV=1;sp|P62715|PP2AB_MOUSE Serine/threonine-protein phosphatase 2A catalytic subunit beta isoform OS=Mus musculus OX=10090	2	1	1	1	1	1	1	1	1	1	1	1	1	1	1	1	1	1	1	1	1	1	1	1	1	1	1	1	1	1	1	1	1	1	1	1	1	1	1	1	3.6	3.6
O88531	O88531	1	1	1	Palmitoyl-protein thioesterase 1	Ppt1	sp|O88531|PPT1_MOUSE Palmitoyl-protein thioesterase 1 OS=Mus musculus OX=10090 GN=Ppt1 PE=1 SV=2	1	1	1	1	1	0	0	1	0	0	0	0	0	0	0	0	1	0	0	1	0	0	0	0	0	0	0	0	1	0	0	1	0	0	0	0	0	0	0	0	4.9	4.9
O08807	O08807	1	1	1	Peroxiredoxin-4	Prdx4	sp|O08807|PRDX4_MOUSE Peroxiredoxin-4 OS=Mus musculus OX=10090 GN=Prdx4 PE=1 SV=1	1	1	1	1	1	1	1	1	1	1	1	1	1	1	1	1	1	1	1	1	1	1	1	1	1	1	1	1	1	1	1	1	1	1	1	1	1	1	1	1	4	4
Q9D7G0;Q9CS42	Q9D7G0;Q9CS42	1;1	1;1	1;1	Ribose-phosphate pyrophosphokinase 1;Ribose-phosphate pyrophosphokinase 2	Prps1;Prps2	sp|Q9D7G0|PRPS1_MOUSE Ribose-phosphate pyrophosphokinase 1 OS=Mus musculus OX=10090 GN=Prps1 PE=1 SV=4;sp|Q9CS42|PRPS2_MOUSE Ribose-phosphate pyrophosphokinase 2 OS=Mus musculus OX=10090 GN=Prps2 PE=1 SV=4	2	1	1	1	1	1	1	1	0	1	0	0	1	1	1	1	1	1	1	1	0	1	0	0	1	1	1	1	1	1	1	1	0	1	0	0	1	1	1	1	5.3	5.3
O70435	O70435	1	1	1	Proteasome subunit alpha type-3	Psma3	sp|O70435|PSA3_MOUSE Proteasome subunit alpha type-3 OS=Mus musculus OX=10090 GN=Psma3 PE=1 SV=3	1	1	1	1	1	1	1	1	0	0	1	0	1	1	1	1	1	1	1	1	0	0	1	0	1	1	1	1	1	1	1	1	0	0	1	0	1	1	1	1	4.7	4.7
Q9QUM9	Q9QUM9	1	1	1	Proteasome subunit alpha type-6	Psma6	sp|Q9QUM9|PSA6_MOUSE Proteasome subunit alpha type-6 OS=Mus musculus OX=10090 GN=Psma6 PE=1 SV=1	1	1	1	1	1	0	0	0	0	0	0	0	0	1	1	0	1	0	0	0	0	0	0	0	0	1	1	0	1	0	0	0	0	0	0	0	0	1	1	0	3.7	3.7
Q9R1P3	Q9R1P3	1	1	1	Proteasome subunit beta type-2	Psmb2	sp|Q9R1P3|PSB2_MOUSE Proteasome subunit beta type-2 OS=Mus musculus OX=10090 GN=Psmb2 PE=1 SV=1	1	1	1	1	1	0	0	0	1	1	1	1	1	0	0	0	1	0	0	0	1	1	1	1	1	0	0	0	1	0	0	0	1	1	1	1	1	0	0	0	5.5	5.5
Q8VDM4	Q8VDM4	2	2	2	26S proteasome non-ATPase regulatory subunit 2	Psmd2	sp|Q8VDM4|PSMD2_MOUSE 26S proteasome non-ATPase regulatory subunit 2 OS=Mus musculus OX=10090 GN=Psmd2 PE=1 SV=1	1	2	2	2	2	1	2	2	1	1	1	1	1	2	2	1	2	1	2	2	1	1	1	1	1	2	2	1	2	1	2	2	1	1	1	1	1	2	2	1	3	3
P17225	P17225	1	1	1	Polypyrimidine tract-binding protein 1	Ptbp1	sp|P17225|PTBP1_MOUSE Polypyrimidine tract-binding protein 1 OS=Mus musculus OX=10090 GN=Ptbp1 PE=1 SV=2	1	1	1	1	1	1	1	1	0	0	1	0	0	1	1	1	1	1	1	1	0	0	1	0	0	1	1	1	1	1	1	1	0	0	1	0	0	1	1	1	4.4	4.4
Q8VDQ1	Q8VDQ1	2	2	2	Prostaglandin reductase 2	Ptgr2	sp|Q8VDQ1|PTGR2_MOUSE Prostaglandin reductase 2 OS=Mus musculus OX=10090 GN=Ptgr2 PE=1 SV=2	1	2	2	2	1	1	2	1	0	0	0	0	0	1	1	1	1	1	2	1	0	0	0	0	0	1	1	1	1	1	2	1	0	0	0	0	0	1	1	1	5.4	5.4
P62821;Q9D1G1;P55258;P61027;P61028;Q9DD03;Q8K386	P62821;Q9D1G1;P55258;P61027;P61028;Q9DD03;Q8K386	1;1;1;1;1;1;1	1;1;1;1;1;1;1	1;1;1;1;1;1;1	Ras-related protein Rab-1A;Ras-related protein Rab-1B;Ras-related protein Rab-8A;Ras-related protein Rab-10;Ras-related protein Rab-8B;Ras-related protein Rab-13;Ras-related protein Rab-15	Rab1A;Rab1b;Rab8a;Rab10;Rab8b;Rab13;Rab15	sp|P62821|RAB1A_MOUSE Ras-related protein Rab-1A OS=Mus musculus OX=10090 GN=Rab1A PE=1 SV=3;sp|Q9D1G1|RAB1B_MOUSE Ras-related protein Rab-1B OS=Mus musculus OX=10090 GN=Rab1b PE=1 SV=1;sp|P55258|RAB8A_MOUSE Ras-related protein Rab-8A OS=Mus musculus OX=10	7	1	1	1	1	1	1	1	0	0	0	0	0	1	1	1	1	1	1	1	0	0	0	0	0	1	1	1	1	1	1	1	0	0	0	0	0	1	1	1	5.4	5.4
P35282	P35282	1	1	1	Ras-related protein Rab-21	Rab21	sp|P35282|RAB21_MOUSE Ras-related protein Rab-21 OS=Mus musculus OX=10090 GN=Rab21 PE=1 SV=4	1	1	1	1	1	1	1	1	0	1	1	0	1	1	1	1	1	1	1	1	0	1	1	0	1	1	1	1	1	1	1	1	0	1	1	0	1	1	1	1	5.9	5.9
Q9CQD1;P35278;P61021	Q9CQD1;P35278;P61021	1;1;1	1;1;1	1;1;1	Ras-related protein Rab-5A;Ras-related protein Rab-5C;Ras-related protein Rab-5B	Rab5a;Rab5c;Rab5b	sp|Q9CQD1|RAB5A_MOUSE Ras-related protein Rab-5A OS=Mus musculus OX=10090 GN=Rab5a PE=1 SV=1;sp|P35278|RAB5C_MOUSE Ras-related protein Rab-5C OS=Mus musculus OX=10090 GN=Rab5c PE=1 SV=2;sp|P61021|RAB5B_MOUSE Ras-related protein Rab-5B OS=Mus musculus OX=10	3	1	1	1	1	1	1	1	0	0	0	0	0	1	1	1	1	1	1	1	0	0	0	0	0	1	1	1	1	1	1	1	0	0	0	0	0	1	1	1	5.1	5.1
P35279;P61294;Q8BHD0	P35279;P61294;Q8BHD0	1;1;1	1;1;1	1;1;1	Ras-related protein Rab-6A;Ras-related protein Rab-6B;Ras-related protein Rab-39A	Rab6a;Rab6b;Rab39a	sp|P35279|RAB6A_MOUSE Ras-related protein Rab-6A OS=Mus musculus OX=10090 GN=Rab6a PE=1 SV=4;sp|P61294|RAB6B_MOUSE Ras-related protein Rab-6B OS=Mus musculus OX=10090 GN=Rab6b PE=1 SV=1;sp|Q8BHD0|RB39A_MOUSE Ras-related protein Rab-39A OS=Mus musculus OX=1	3	1	1	1	1	1	1	1	1	1	1	1	1	1	1	1	1	1	1	1	1	1	1	1	1	1	1	1	1	1	1	1	1	1	1	1	1	1	1	1	5.3	5.3
Q9QUI0;Q62159	Q9QUI0;Q62159	1;1	1;1	1;1	Transforming protein RhoA;Rho-related GTP-binding protein RhoC	Rhoa;Rhoc	sp|Q9QUI0|RHOA_MOUSE Transforming protein RhoA OS=Mus musculus OX=10090 GN=Rhoa PE=1 SV=1;sp|Q62159|RHOC_MOUSE Rho-related GTP-binding protein RhoC OS=Mus musculus OX=10090 GN=Rhoc PE=1 SV=2	2	1	1	1	1	1	1	1	1	0	0	0	1	1	1	1	1	1	1	1	1	0	0	0	1	1	1	1	1	1	1	1	1	0	0	0	1	1	1	1	5.7	5.7
Q8VCT3	Q8VCT3	1	1	1	Aminopeptidase B	Rnpep	sp|Q8VCT3|AMPB_MOUSE Aminopeptidase B OS=Mus musculus OX=10090 GN=Rnpep PE=1 SV=2	1	1	1	1	1	1	1	1	1	1	1	1	0	1	1	0	1	1	1	1	1	1	1	1	0	1	1	0	1	1	1	1	1	1	1	1	0	1	1	0	1.5	1.5
Q9CZM2	Q9CZM2	1	1	1	60S ribosomal protein L15	Rpl15	sp|Q9CZM2|RL15_MOUSE 60S ribosomal protein L15 OS=Mus musculus OX=10090 GN=Rpl15 PE=1 SV=4	1	1	1	1	1	1	1	1	0	0	0	0	0	1	1	1	1	1	1	1	0	0	0	0	0	1	1	1	1	1	1	1	0	0	0	0	0	1	1	1	4.4	4.4
P84099	P84099	1	1	1	60S ribosomal protein L19	Rpl19	sp|P84099|RL19_MOUSE 60S ribosomal protein L19 OS=Mus musculus OX=10090 GN=Rpl19 PE=1 SV=1	1	1	1	1	1	1	1	1	1	0	0	1	0	1	1	1	1	1	1	1	1	0	0	1	0	1	1	1	1	1	1	1	1	0	0	1	0	1	1	1	4.6	4.6
P62918	P62918	2	2	2	60S ribosomal protein L8	Rpl8	sp|P62918|RL8_MOUSE 60S ribosomal protein L8 OS=Mus musculus OX=10090 GN=Rpl8 PE=1 SV=2	1	2	2	2	1	1	1	1	2	2	2	2	2	2	1	1	1	1	1	1	2	2	2	2	2	2	1	1	1	1	1	1	2	2	2	2	2	2	1	1	10.5	10.5
P25444	P25444	2	2	2	40S ribosomal protein S2	Rps2	sp|P25444|RS2_MOUSE 40S ribosomal protein S2 OS=Mus musculus OX=10090 GN=Rps2 PE=1 SV=3	1	2	2	2	2	2	2	2	2	2	2	1	1	2	2	2	2	2	2	2	2	2	2	1	1	2	2	2	2	2	2	2	2	2	2	1	1	2	2	2	8.2	8.2
Q6ZWN5	Q6ZWN5	1	1	1	40S ribosomal protein S9	Rps9	sp|Q6ZWN5|RS9_MOUSE 40S ribosomal protein S9 OS=Mus musculus OX=10090 GN=Rps9 PE=1 SV=3	1	1	1	1	1	1	1	1	1	1	1	1	1	1	1	1	1	1	1	1	1	1	1	1	1	1	1	1	1	1	1	1	1	1	1	1	1	1	1	1	4.6	4.6
P14206	P14206	1	1	1	40S ribosomal protein SA	Rpsa	sp|P14206|RSSA_MOUSE 40S ribosomal protein SA OS=Mus musculus OX=10090 GN=Rpsa PE=1 SV=4	1	1	1	1	1	1	1	1	0	1	0	0	0	1	1	1	1	1	1	1	0	1	0	0	0	1	1	1	1	1	1	1	0	1	0	0	0	1	1	1	4.4	4.4
P14069	P14069	1	1	1	Protein S100-A6	S100a6	sp|P14069|S10A6_MOUSE Protein S100-A6 OS=Mus musculus OX=10090 GN=S100a6 PE=1 SV=3	1	1	1	1	1	1	1	1	0	0	0	0	0	1	1	1	1	1	1	1	0	0	0	0	0	1	1	1	1	1	1	1	0	0	0	0	0	1	1	1	9	9
P36536;Q9CQC9	P36536;Q9CQC9	1;1	1;1	1;1	GTP-binding protein SAR1a;GTP-binding protein SAR1b	Sar1a;Sar1b	sp|P36536|SAR1A_MOUSE GTP-binding protein SAR1a OS=Mus musculus OX=10090 GN=Sar1a PE=1 SV=1;sp|Q9CQC9|SAR1B_MOUSE GTP-binding protein SAR1b OS=Mus musculus OX=10090 GN=Sar1b PE=1 SV=1	2	1	1	1	1	1	1	1	0	0	1	1	1	1	1	1	1	1	1	1	0	0	1	1	1	1	1	1	1	1	1	1	0	0	1	1	1	1	1	1	5.6	5.6
P22599	P22599	8	1	1	Alpha-1-antitrypsin 1-2	Serpina1b	sp|P22599|A1AT2_MOUSE Alpha-1-antitrypsin 1-2 OS=Mus musculus OX=10090 GN=Serpina1b PE=1 SV=2	1	8	1	1	8	6	8	8	4	4	3	6	5	6	7	8	1	1	1	1	0	0	0	1	0	1	1	1	1	1	1	1	0	0	0	1	0	1	1	1	24	2.4
Q00897	Q00897	7	1	1	Alpha-1-antitrypsin 1-4	Serpina1d	sp|Q00897|A1AT4_MOUSE Alpha-1-antitrypsin 1-4 OS=Mus musculus OX=10090 GN=Serpina1d PE=1 SV=1	1	7	1	1	7	5	7	7	4	5	3	5	5	6	6	7	1	1	1	1	1	1	0	1	1	1	1	1	1	1	1	1	1	1	0	1	1	1	1	1	18.6	2.4
P97290	P97290	1	1	1	Plasma protease C1 inhibitor	Serping1	sp|P97290|IC1_MOUSE Plasma protease C1 inhibitor OS=Mus musculus OX=10090 GN=Serping1 PE=1 SV=3	1	1	1	1	1	1	1	1	0	0	0	0	0	1	1	1	1	1	1	1	0	0	0	0	0	1	1	1	1	1	1	1	0	0	0	0	0	1	1	1	2.2	2.2
P70665	P70665	1	1	1	Sialate O-acetylesterase;Sialate O-acetylesterase small subunit;Sialate O-acetylesterase large subunit	Siae	sp|P70665|SIAE_MOUSE Sialate O-acetylesterase OS=Mus musculus OX=10090 GN=Siae PE=1 SV=3	1	1	1	1	1	1	1	1	0	0	0	0	0	1	1	1	1	1	1	1	0	0	0	0	0	1	1	1	1	1	1	1	0	0	0	0	0	1	1	1	2.2	2.2
P08228	P08228	2	2	2	Superoxide dismutase [Cu-Zn]	Sod1	sp|P08228|SODC_MOUSE Superoxide dismutase [Cu-Zn] OS=Mus musculus OX=10090 GN=Sod1 PE=1 SV=2	1	2	2	2	1	0	0	0	2	2	2	2	2	0	0	0	1	0	0	0	2	2	2	2	2	0	0	0	1	0	0	0	2	2	2	2	2	0	0	0	16.2	16.2
P25785	P25785	1	1	1	Metalloproteinase inhibitor 2	Timp2	sp|P25785|TIMP2_MOUSE Metalloproteinase inhibitor 2 OS=Mus musculus OX=10090 GN=Timp2 PE=1 SV=2	1	1	1	1	1	1	0	1	0	1	0	1	1	1	0	0	1	1	0	1	0	1	0	1	1	1	0	0	1	1	0	1	0	1	0	1	1	1	0	0	4.5	4.5
O70157	O70157	2	2	2	DNA topoisomerase 3-alpha	Top3a	sp|O70157|TOP3A_MOUSE DNA topoisomerase 3-alpha OS=Mus musculus OX=10090 GN=Top3a PE=2 SV=1	1	2	2	2	1	1	1	1	2	2	2	2	2	1	1	1	1	1	1	1	2	2	2	2	2	1	1	1	1	1	1	1	2	2	2	2	2	1	1	1	3.2	3.2
P52196	P52196	1	1	1	Thiosulfate sulfurtransferase	Tst	sp|P52196|THTR_MOUSE Thiosulfate sulfurtransferase OS=Mus musculus OX=10090 GN=Tst PE=1 SV=3	1	1	1	1	1	0	1	1	0	0	0	0	0	1	1	1	1	0	1	1	0	0	0	0	0	1	1	1	1	0	1	1	0	0	0	0	0	1	1	1	6.4	6.4
Q922F4	Q922F4	7	1	1	Tubulin beta-6 chain	Tubb6	sp|Q922F4|TBB6_MOUSE Tubulin beta-6 chain OS=Mus musculus OX=10090 GN=Tubb6 PE=1 SV=1	1	7	1	1	6	6	6	6	6	4	5	5	4	7	6	6	0	0	0	0	0	0	0	0	0	1	0	0	0	0	0	0	0	0	0	0	0	1	0	0	20.8	3.8
P10639	P10639	1	1	1	Thioredoxin	Txn	sp|P10639|THIO_MOUSE Thioredoxin OS=Mus musculus OX=10090 GN=Txn PE=1 SV=3	1	1	1	1	1	1	1	0	1	1	1	1	1	1	1	1	1	1	1	0	1	1	1	1	1	1	1	1	1	1	1	0	1	1	1	1	1	1	1	1	12.4	12.4
Q9JMH6	Q9JMH6	1	1	1	Thioredoxin reductase 1, cytoplasmic	Txnrd1	sp|Q9JMH6|TRXR1_MOUSE Thioredoxin reductase 1, cytoplasmic OS=Mus musculus OX=10090 GN=Txnrd1 PE=1 SV=3	1	1	1	1	1	1	1	1	0	0	0	0	0	1	1	1	1	1	1	1	0	0	0	0	0	1	1	1	1	1	1	1	0	0	0	0	0	1	1	1	1.8	1.8
Q01853	Q01853	2	2	2	Transitional endoplasmic reticulum ATPase	Vcp	sp|Q01853|TERA_MOUSE Transitional endoplasmic reticulum ATPase OS=Mus musculus OX=10090 GN=Vcp PE=1 SV=4	1	2	2	2	2	1	1	1	2	0	0	0	1	2	2	2	2	1	1	1	2	0	0	0	1	2	2	2	2	1	1	1	2	0	0	0	1	2	2	2	2.6	2.6
Q91XU0	Q91XU0	1	1	1	ATPase WRNIP1	Wrnip1	sp|Q91XU0|WRIP1_MOUSE ATPase WRNIP1 OS=Mus musculus OX=10090 GN=Wrnip1 PE=1 SV=2	1	1	1	1	0	0	0	0	0	0	1	0	0	0	0	0	0	0	0	0	0	0	1	0	0	0	0	0	0	0	0	0	0	0	1	0	0	0	0	0	1.2	1.2
P61982	P61982	2	1	1	14-3-3 protein gamma;14-3-3 protein gamma, N-terminally processed	Ywhag	sp|P61982|1433G_MOUSE 14-3-3 protein gamma OS=Mus musculus OX=10090 GN=Ywhag PE=1 SV=2	1	2	1	1	2	1	1	2	1	1	1	1	1	2	1	0	1	0	0	1	0	0	0	0	0	1	1	0	1	0	0	1	0	0	0	0	0	1	1	0	8.1	4
P68510	P68510	2	1	1	14-3-3 protein eta	Ywhah	sp|P68510|1433F_MOUSE 14-3-3 protein eta OS=Mus musculus OX=10090 GN=Ywhah PE=1 SV=2	1	2	1	1	2	2	2	2	1	1	1	2	2	2	1	1	1	1	1	1	0	0	0	1	1	1	1	1	1	1	1	1	0	0	0	1	1	1	1	1	9.8	5.7
REV__O70481	REV__O70481	2	2	2			sp|O70481|UBR1_MOUSE E3 ubiquitin-protein ligase UBR1 OS=Mus musculus OX=10090 GN=Ubr1 PE=1 SV=2	1	2	2	2	2	2	1	2	1	1	1	1	1	2	2	2	2	2	1	2	1	1	1	1	1	2	2	2	2	2	1	2	1	1	1	1	1	2	2	2	0	0
REV__P14873	REV__P14873	1	1	1			sp|P14873|MAP1B_MOUSE Microtubule-associated protein 1B OS=Mus musculus OX=10090 GN=Map1b PE=1 SV=2	1	1	1	1	1	1	1	1	1	1	1	1	1	1	1	1	1	1	1	1	1	1	1	1	1	1	1	1	1	1	1	1	1	1	1	1	1	1	1	1	0	0
REV__Q9Z1M7	REV__Q9Z1M7	1	1	1			sp|Q9Z1M7|LARG1_MOUSE LARGE xylosyl- and glucuronyltransferase 1 OS=Mus musculus OX=10090 GN=Large1 PE=1 SV=1	1	1	1	1	1	1	1	1	1	1	1	1	1	1	1	1	1	1	1	1	1	1	1	1	1	1	1	1	1	1	1	1	1	1	1	1	1	1	1	1	0	0
[truncated: 63 more columns]

## Sheet: Figure 3e
			Gel 1													Gel 2																Gel 3
Lane	1	2	3	4	5	6	7	8	9	10	11	12	13	14		Lane	1	2	3	4	5	6	7	8	9	10	11	12	13	14		Lane	1	2	3	4	5	6	7	8	9	10	11	12	13	14
Compound	DMSO	ABX							DMOS	LEI-515						Compound	DMSO	ABX							DMSO	LEI-515						Compound	DMSO	ABX							DMOS	LEI-515
Concentration		1 nM	10 nM	0.1 µM	1 µM	10µM				1 nM	10 nM	0.1 µM	1 µM	10µM		Concentration		1 nM	10 nM	0.1 µM	1 µM	10µM				1 nM	10 nM	0.1 µM	1 µM	10µM		Concentration		1 nM	10 nM	0.1 µM	1 µM	10µM				1 nM	10 nM	0.1 µM	1 µM	10µM

## Sheet: Figure 3f-i
2-AG&1-AG (20:4)
										Area	MJ30	MJ34	MJ38	MJ42	MJ46	MJ50	MJ31	MJ35	MJ39	MJ43	MJ47	MJ51	MJ32	MJ36	MJ40	MJ44	MJ48	MJ52	MJ33	MJ37	MJ41	MJ45	MJ49	MJ53	MJ107	MJ108	MJ109	MJ110	MJ111	MJ112	MJ113	MJ114	MJ54	MJ59	MJ64	MJ69	MJ74	MJ79	MJ84
	ID	Sample	RT	Area	IS Area	S/N	Vial			2-AG&1-AG (20:4)	8439	29624	37036	24480	61251	65370	9069	22333	22642	31107	40546	51635	11880	23895	33142	42179	42236	86114	12440	35545	41795	60343	52783	53862	243	493	894	3015	9054	24848	81920	288138	27233	24003	27963	70352	74131	65021	75674
1	MJ99	Calibration curve_1	4.82	207	1535	3	1:A,2			AA (FA 20:4)	22100	14367	20667	10912	22238	21174	16212	11822	12544	17847	19007	18253	31908	15691	20672	16105	26072	32129	34691	28222	23460	24654	21858	23820	34	59	153	482	1793	5016	18587	57788	68668	51611	58550	41625	59051	52033	47143
2	MJ100	Calibration curve_1	4.83	260	1180	2	1:A,3			AEA (20:4)	22098	25053	24465	21706	16675	13744	12942	10818	18315	18061	12393	13213	12732	12568	17041	11713	15692	13674	15017	14828	21229	20919	16617	15177	30	108	149	484	1464	3462	11442	34743	19678	24876	30922	24083	23942	30081	20406
3	MJ101	Calibration curve_1	5.07	882	1355	12	1:A,4			2-AG-d8 (20:4)	1587	1969	2034	1811	1434	1110	1301	559	1362	1683	821	1368	1264	1242	1436	1549	1555	1319	1198	1263	1514	1099	1101	961	993	1293	1785	1769	1808	2226	2005	1816	1324	1984	1533	1647	1569	1783	2190
4	MJ102	Calibration curve_1	5.06	2216	1581	55	1:A,5			AEA-d8 (20:4)	16644	21555	20437	18144	14602	12767	12640	11777	15312	17328	12422	13411	10807	10969	15157	17809	13745	13145	12252	11651	16834	17456	12346	12079	16368	16868	18305	19088	22490	21176	20725	22917	23048	24019	24063	23056	21085	22060	19318
5	MJ103	Calibration curve_1	5.06	8220	1801	328	1:A,6			AA-d8 (FA 20:4)	41742	45560	46475	43037	39451	42417	44021	35261	38211	53069	40333	44402	40278	37774	45292	50700	43568	44936	53633	47421	50777	57854	47735	42885	10293	10806	11943	13428	13498	13214	12864	14452	60516	66649	66219	61905	66162	64918	61955
6	MJ104	Calibration curve_1	5.06	28243	2220	39	1:A,7
7	MJ105	Calibration curve_1	5.06	96625	1572	45	1:A,8
8	MJ106	Calibration curve_1	5.06	277762	2550	2591	1:B,1			Response Ratio (RR)	MJ30	MJ34	MJ38	MJ42	MJ46	MJ50	MJ31	MJ35	MJ39	MJ43	MJ47	MJ51	MJ32	MJ36	MJ40	MJ44	MJ48	MJ52	MJ33	MJ37	MJ41	MJ45	MJ49	MJ53	MJ107	MJ108	MJ109	MJ110	MJ111	MJ112	MJ113	MJ114	MJ54	MJ59	MJ64	MJ69	MJ74	MJ79	MJ84
9	MJ30	Cells	4.88	8439		141	1:B,2			2-AG&1-AG (20:4)	5.31758	15.0452	18.2085	13.5174	42.7134	58.8919	6.97079	39.9517	16.6241	18.4831	49.3861	37.7449	9.39873	19.2391	23.0794	27.2298	27.1614	65.2873	10.384	28.1433	27.6057	54.9072	47.941	56.0479	0.244713	0.381284	0.50084	1.70435	5.00774	11.1626	40.8579	158.666	20.5687	12.0983	18.2407	42.7152	47.2473	36.4672	34.5543
10	MJ34	Cells	4.88	29624	1969	201	1:B,6			AA (FA 20:4)	0.529443	0.315342	0.444691	0.253549	0.563687	0.499187	0.368279	0.335271	0.328282	0.336298	0.471252	0.411085	0.792194	0.415392	0.456416	0.317653	0.598421	0.714995	0.646822	0.595137	0.46202	0.426142	0.457903	0.555439	0.00330322	0.00545993	0.0128109	0.0358951	0.132834	0.379597	1.44488	3.99862	1.13471	0.77437	0.884187	0.672401	0.892521	0.801519	0.760923
11	MJ38	Cells	4.89	37036	2034	855	1:C,2			AEA (20:4)	1.32769	1.16228	1.19709	1.19632	1.14197	1.07653	1.02389	0.91857	1.19612	1.0423	0.997665	0.985236	1.17813	1.14577	1.1243	0.657701	1.14165	1.04024	1.22568	1.27268	1.26108	1.19838	1.34594	1.25648	0.00183284	0.00640266	0.00813985	0.0253562	0.0650956	0.163487	0.552087	1.51604	0.853783	1.03568	1.28504	1.04454	1.1355	1.3636	1.05632
12	MJ42	Cells	4.88	24480	1811	103	1:C,6
13	MJ46	Cells	4.88	61251	1434	460	1:D,2
14	MJ50	Cells	4.88	65370	1110	702	1:D,6			Calibration curve
15	MJ31	Cells	4.88	9069	1301	295	1:B,3			RR	MJ99	MJ100	MJ101	MJ102	MJ103	MJ104	MJ105	MJ106	MJ107	MJ108	MJ109	MJ110	MJ111	MJ112	MJ113	MJ114
16	MJ35	Cells	4.89	22333	559	921	1:B,7			2-AG&1-AG (20:4)	0.134853	0.220339	0.650923	1.40164	4.56413	12.7221	61.4663	108.926	0.244713	0.381284	0.50084	1.70435	5.00774	11.1626	40.8579	158.666
17	MJ39	Cells	4.89	22642	1362	370	1:C,3			AA (FA 20:4)	0.00609455	0.00592008	0.0130174	0.0460458	0.166181	0.427804	1.29713	3.72277	0.00330322	0.00545993	0.0128109	0.0358951	0.132834	0.379597	1.44488	3.99862
18	MJ43	Cells	4.90	31107	1683	145	1:C,7			AEA (20:4)	0.00391587	0.00357733	0.00925306	0.0245048	0.0559275	0.166288	0.548693	1.6138	0.00183284	0.00640266	0.00813985	0.0253562	0.0650956	0.163487	0.552087	1.51604
19	MJ47	Cells	4.87	40546	821	563	1:D,3
20	MJ51	Cells	4.88	51635	1368	319	1:D,7
21	MJ32	Cells	4.88	11880	1264	9	1:B,4				CC01_C0-I8	CC02_C1-I8	CC03_C2-I8	CC04_C3-I8	CC05_C4-I8	CC06_C5-I8	CC07_C6-I8	CC08_C7-I8	R^2	Slope	Intercept			Factor	32.4
22	MJ36	Cells	4.89	23895		33	1:B,8			[2-AG&1-AG]	0	0.3	1	3	10	30	100	300
23	MJ40	Cells	4.89	33142	1318	18	1:C,4			RR 2-AG & 1-AG	0.189783	0.300811	0.575881	1.553	4.78594	11.9423	51.1621	133.796	0.997437	0.449597	0.568764
24	MJ44	Cells	4.88	42179	1549	51	1:C,8			[AA]	0	1.5	5	15	50	150	500	1500
25	MJ48	Cells	4.89	42236	1555	349	1:D,4			RR AA	0.00469888	0.00569	0.0129141	0.0409705	0.149508	0.403701	1.37101	3.86069	0.999555	0.00257865	0.0150892
26	MJ52	Cells	4.89	86114	1319	245	1:D,8			[AEA]	0	0.003	0.01	0.03	0.1	0.3	1	3
27	MJ33	Cells	4.89	12440	1198	122	1:B,5			RR AEA	0.00287436	0.00498999	0.00869646	0.0249305	0.0605116	0.164888	0.55039	1.56492	0.999729	0.52119	0.00831856
28	MJ37	Cells	4.89	35545	1263	199	1:C,1
29	MJ41	Cells	4.89	41795	1514	663	1:C,5
30	MJ45	Cells	4.90	60343	1099	859	1:D,1
31	MJ49	Cells	4.90	52783		52	1:D,5			Absolute amounts	MJ30	MJ34	MJ38	MJ42	MJ46	MJ50	MJ31	MJ35	MJ39	MJ43	MJ47	MJ51	MJ32	MJ36	MJ40	MJ44	MJ48	MJ52	MJ33	MJ37	MJ41	MJ45	MJ49	MJ53	MJ107	MJ108	MJ109	MJ110	MJ111	MJ112	MJ113	MJ114	MJ54	MJ59	MJ64	MJ69	MJ74	MJ79	MJ84
32	MJ53	Cells	4.90	53862	959	741	1:E,1			2-AG&1-AG (20:4)	342.221	1043.24	1271.2	933.137	3037.13	4203.03	461.359	2838.11	1157.02	1290.99	3518	2679.08	636.328	1345.47	1622.22	1921.32	1916.39	4663.91	707.328	1987.15	1948.4	3915.87	3413.85	3998.07	-23.3526	-13.5107	-4.89491	81.8356	319.893	763.441	2903.41	11393.2	1441.29	830.869	1273.52	3037.27	3363.87	2587	2449.15
33	MJ107	Calibration curve_2_new vial_same rc	4.87	243	993	5	2:D,8			AA (FA 20:4)	6462.7	3772.59	5397.82	2996.18	6892.97	6082.55	4437.73	4023	3935.18	4035.9	5731.55	4975.57	9764.1	5029.68	5545.15	3801.63	7329.39	8794.11	7937.54	7288.14	5615.56	5164.76	5563.83	6789.34	-148.088	-120.989	-28.6272	261.42	1479.44	4579.94	17965	50051.9	14067.7	9540.15	10920	8258.94	11024.7	9881.26	9371.19
34	MJ108	Calibration curve_2	5.09	493	1293	6	2:E,1			AEA (20:4)	82.019	71.7366	73.9007	73.8525	70.4737	66.4055	63.1336	56.5861	73.8402	64.278	61.5031	60.7305	72.7215	70.7104	69.3754	40.3691	70.4541	64.15	75.6776	78.5996	77.8783	73.9809	83.1539	77.5923	-0.403187	-0.119103	-0.0111095	1.05915	3.52957	9.64611	33.8036	93.7279	52.5587	63.8663	79.3681	64.4173	70.0716	84.2516	65.1495
35	MJ109	Calibration curve_2	5.09	894	1785	20	2:E,2
36	MJ110	Calibration curve_2	5.09	3015	1769	53	2:E,3
37	MJ111	Calibration curve_2	5.09	9054	1808	40	2:E,4
38	MJ112	Calibration curve_2	5.09	24848	2226	59	2:E,5
39	MJ113	Calibration curve_2	5.08	81920	2005	1358	2:E,6													Processed data in graph
40	MJ114	Calibration curve_2	5.08	288138	1816	740	2:E,7									Absolute amounts				Absolute amounts normalised
41	MJ54	Cells	4.89	27233	1324	35	1:E,2			Figure 3	Sample	Concentration LEI-515	Incubation time	Protein concentration(mg/ml)		2-AG&1-AG (20:4)	AA (FA 20:4)	AEA (20:4)		2-AG&1-AG (20:4)	AA (FA 20:4)	AEA (20:4)
42	MJ59	Cells	4.90	24003	1984	132	1:E,7			g	MJ30_DMSO_1		1 hour	1.16156		342.221	6462.7	82.019		294.622	5563.81	70.6111
43	MJ64	Cells	4.90	27963	1253	217	1:F,4			g	MJ31_DMSO_2		1 hour	1.23584		461.359	4437.73	63.1336		373.316	3590.86	51.0855
44	MJ69	Cells	4.90	70352	1647	267	2:A,1			g	MJ32_DMSO_3		1 hour	1.31941		636.328	9764.1	72.7215		482.283	7400.38	55.1168
45	MJ74	Cells	4.90	74131	1569	18	2:A,6			g	MJ33_DMSO_4		1 hour	0.985144		707.328	7937.54	75.6776		717.995	8057.24	76.8188
46	MJ79	Cells	4.89	65021	1783	511	2:B,3			g	MJ34_01_1	0.1 µM	1 hour	1.21727		1043.24	3772.59	71.7366		857.03	3099.23	58.9324
47	MJ84	Cells	4.89	75674	1969	71	2:B,8			g	MJ35_01_2	0.1 µM	1 hour	1.89508		2838.11	4023	56.5861		1497.62	2122.86	29.8595
48	MJ89	Cells	4.90	71820	1856	499	2:C,5			g	MJ36_01_3	0.1 µM	1 hour	1.60724		1345.47	5029.68	70.7104		837.13	3129.39	43.9949
49	MJ94	Cells	4.89	81110	952	1373	2:D,2			g	MJ37_01_4	0.1 µM	1 hour	1.40297		1987.15	7288.14	78.5996		1416.38	5194.79	56.0237
50	MJ55	Cells	4.89	16700	987	501	1:E,3			g	MJ38_03_1	0.3 µM	1 hour	1.8208		1271.2	5397.82	73.9007		698.153	2964.53	40.5869
51	MJ60	Cells	4.88	15583	1423	69	1:E,8			g	MJ39_03_2	0.3 µM	1 hour	1.7558		1157.02	3935.18	73.8402		658.968	2241.24	42.0549
52	MJ65	Cells	4.90	15891	1335	84	1:F,5			g	MJ40_03_3	0.3 µM	1 hour	1.41226		1622.22	5545.15	69.3754		1148.67	3926.45	49.1238
53	MJ70	Cells	4.90	88086	1701	461	2:A,2			g	MJ41_03_4	0.3 µM	1 hour	1.74652		1948.4	5615.56	77.8783		1115.59	3215.29	44.5906
54	MJ75	Cells	4.90	76094	1507	544	2:A,7			g	MJ42_1_1	1 µM	1 hour	1.81151		933.137	2996.18	73.8525		515.115	1653.97	40.7684
55	MJ80	Cells	4.89	51716		428	2:B,4			g	MJ43_1_2	1 µM	1 hour	1.8208		1290.99	4035.9	64.278		709.021	2216.55	35.3021
56	MJ85	Cells	4.89	76109	1606	372	2:C,1			g	MJ44_1_3	1 µM	1 hour	1.7558		1921.32	3801.63	40.3691		1094.27	2165.18	22.9918
57	MJ90	Cells	4.89	59119		835	2:C,6			g	MJ45_1_4	1 µM	1 hour	1.6351		3915.87	5164.76	73.9809		2394.89	3158.68	45.2456
58	MJ95	Cells	4.90	65039	859	307	2:D,3			g	MJ46_3_1	3 µM	1 hour	2.43361		3037.13	6892.97	70.4737		1247.99	2832.4	28.9585
59	MJ56	Cells	4.90	21769	1026	356	1:E,4			g	MJ47_3_2	3 µM	1 hour	1.30084		3518	5731.55	61.5031		2704.41	4406.05	47.2797
60	MJ61	Cells	4.90	22314	1304	103	1:F,1			g	MJ48_3_3	3 µM	1 hour	1.43083		1916.39	7329.39	70.4541		1339.36	5122.49	49.2402
61	MJ66	Cells	4.89	14899	1639	33	1:F,6			g	MJ49_3_4	3 µM	1 hour	1.87651		3413.85	5563.83	83.1539		1819.26	2964.99	44.3131
62	MJ71	Cells	4.90	54788	4	40	2:A,3			g	MJ50_10_1	10 µM	1 hour	2.0715		4203.03	6082.55	66.4055		2028.98	2936.31	32.0568
63	MJ76	Cells	4.90	58087	1174	23	2:A,8			g	MJ51_10_2	10 µM	1 hour	2.03436		2679.08	4975.57	60.7305		1316.92	2445.77	29.8524
64	MJ81	Cells	4.90	43286	12	47	2:B,5			g	MJ52_10_3	10 µM	1 hour	1.9415		4663.91	8794.11	64.15		2402.22	4529.54	33.0414
65	MJ86	Cells	4.89	45858	1387	89	2:C,2			g	MJ53_10_4	10 µM	1 hour	2.01579		3998.07	6789.34	77.5923		1983.38	3368.09	38.4924
66	MJ91	Cells	4.90	95581	1394	589	2:C,7			f	MJ54_DMSO_20min_1		20 min	0.761095		1441.29	14067.7	52.5587		1893.7	18483.5	69.0566
67	MJ96	Cells	4.90	53726	1605	590	2:D,4			f	MJ55_DMSO_20min_2		20 min	1.47875		1178.34	9410.2	62.4745		796.847	6363.6	42.248
68	MJ57	Cells	4.90	12616	1445	249	1:E,5			f	MJ56_DMSO_20min_3		20 min	1.25212		1488.03	9795.23	59.4505		1188.4	7822.89	47.4797
69	MJ62	Cells	4.89	23012	1584	424	1:F,2			f	MJ57_DMSO_20min_4		20 min	1.40321		588.193	5681.66	47.7554		419.176	4049.04	34.033
70	MJ67	Cells	4.90	15684	1798	33	1:F,7			f	MJ58_DMSO_20min_5		20 min	1.96034		850.543	6924.84	55.5595		433.875	3532.47	28.3417
71	MJ72	Cells	4.89	100709	2007	99	2:A,4			f,h,i	MJ59_DMSO_1h_1		1h	1.79981		830.869	9540.15	63.8663		461.643	5300.64	35.485
72	MJ77	Cells	4.89	68637	1311	389	2:B,1			f,h,i	MJ60_DMSO_1h_2		1h	2.15864		748.177	9885.02	61.5554		346.596	4579.28	28.5158
73	MJ82	Cells	4.89	54992	3	1022	2:B,6			f,h,i	MJ61_DMSO_1h_3		1h	1.84702		1192.18	9730.81	65.5995		645.458	5268.37	35.5163
74	MJ87	Cells	4.90	65305	1220	352	2:C,3			f,h,i	MJ62_DMSO_1h_4		1h	1.89424		1005.95	8914.64	47.9589		531.057	4706.18	25.3183
75	MJ92	Cells	4.89	92108		423	2:C,8			f,h,i	MJ63_DMSO_1h_5		1h	2.09254		835.535	7297.46	60.0888		399.292	3487.37	28.7157
76	MJ97	Cells	4.89	70481	1200	109	2:D,5			f	MJ64_DMSO_3h_1		3h	1.86591		1273.52	10920	79.3681		682.519	5852.35	42.5358
77	MJ58	Cells	4.90	19992	1616	164	1:E,6			f	MJ65_DMSO_3h_2		3h	1.60151		816.823	8648.01	64.863		510.033	5399.91	40.5011
78	MJ63	Cells	4.89	18354	1509	151	1:F,3			f	MJ66_DMSO_3h_3		3h	2.09254		614.1	8457.05	75.6592		293.471	4041.53	36.1566
79	MJ68	Cells	4.90	25831	1156	613	1:F,8			f	MJ67_DMSO_3h_4		3h	1.61095		587.633	4773.75	50.1416		364.773	2963.31	31.1254
80	MJ73	Cells	4.90	84415	1822	16	2:A,5			f	MJ68_DMSO_3h_5		3h	1.85647		1569.31	7105.98	74.158		845.318	3827.69	39.9458
81	MJ78	Cells	4.91	57281	1676	1034	2:B,2			f	MJ84_LEI-515_20min_1	1 µM	20 min	2.68505		2449.15	9371.19	65.1495		912.144	3490.13	24.2638
82	MJ83	Cells	4.90	56176	1800	43	2:B,7			f	MJ85_LEI-515_20min_2	1 µM	20 min	2.23996		3374.18	7395.9	65.2252		1506.36	3301.8	29.1189
83	MJ88	Cells	4.90	83390	1928	588	2:C,4			f	MJ86_LEI-515_20min_3	1 µM	20 min	2.30769		2341.66	7233.87	67.1017		1014.72	3134.68	29.0774
84	MJ93	Cells	4.90	60279	1323	173	2:D,1			f	MJ87_LEI-515_20min_4	1 µM	20 min	1.8626		3816.53	8465.85	52.7874		2049.03	4545.17	28.3407
85	MJ98	Cells	4.91	53641	1261	310	2:D,6			f	MJ88_LEI-515_20min_5	1 µM	20 min	2.45283		3075.95	9496.69	63.027		1254.04	3871.73	25.6956
										f,h,i	MJ89_LEI-515_1h_1	1 µM	1h	1.14659		2747.63	11057	63.7922		2396.35	9643.4	55.6365
AA (FA 20:4)										f,h,i	MJ90_LEI-515_1h_2	1 µM	1h	2.27867		2664.02	11753.7	70.8381		1169.11	5158.15	31.0876
										f,h,i	MJ91_LEI-515_1h_3	1 µM	1h	2.23996		4900.19	9574.66	82.2186		2187.62	4274.48	36.7054
	ID	Sample Text	RT	Area	IS Area	S/N	Vial			f,h,i	MJ92_LEI-515_1h_4	1 µM	1h	2.22061		5202.08	9672.68	54.3644		2342.63	4355.86	24.4817
1	MJ99	Calibration curve_1	6.02	37	6071	3	1:A,2			f,h,i	MJ93_LEI-515_1h_5	1 µM	1h	1.95936		3242.44	7732.9	78.4		1654.85	3946.64	40.0131
2	MJ100	Calibration curve_1	6.04	36	6081	4	1:A,3			f	MJ94_LEI-515_3h_1	1 µM	3h	2.45283		6098.88	14274.3	84.3094		2486.47	5819.53	34.3723
3	MJ101	Calibration curve_1	6.05	89	6837	7	1:A,4			f	MJ95_LEI-515_3h_2	1 µM	3h	1.71747		5415.36	11393.1	92.6701		3153.11	6633.65	53.9575
4	MJ102	Calibration curve_1	6.04	400	8687	40	1:A,5			f	MJ96_LEI-515_3h_3	1 µM	3h	2.18191		2371.31	9975.7	94.8546		1086.81	4572.01	43.4733
5	MJ103	Calibration curve_1	6.04	1541	9273	105	1:A,6			f	MJ97_LEI-515_3h_4	1 µM	3h	1.48524		4191.66	8673.92	77.9856		2822.2	5840.06	52.5069
6	MJ104	Calibration curve_1	6.05	4462	10430	407	1:A,7			f	MJ98_LEI-515_3h_5	1 µM	3h	2.58759		3024.53	7853.9	107.839		1168.86	3035.22	41.6754
7	MJ105	Calibration curve_1	6.05	13987	10783	1232	1:A,8
8	MJ106	Calibration curve_1	6.05	42998	11550	1997	1:B,1
9	MJ30	Cells	6.05	22100	41742	1537	1:B,2
10	MJ34	Cells	6.06	14367	45560	746	1:B,6
11	MJ38	Cells	6.05	20667	46475	1355	1:C,2
12	MJ42	Cells	6.05	10912	43037	595	1:C,6
13	MJ46	Cells	6.05	22238	39451	606	1:D,2
14	MJ50	Cells	6.05	21174	42417	783	1:D,6
15	MJ31	Cells	6.05	16212	44021	454	1:B,3
16	MJ35	Cells	6.05	11822	35261	888	1:B,7
17	MJ39	Cells	6.05	12544	38211	958	1:C,3
18	MJ43	Cells	6.05	17847	53069	71	1:C,7
19	MJ47	Cells	6.05	19007	40333	1389	1:D,3
20	MJ51	Cells	6.05	18253	44402	533	1:D,7
21	MJ32	Cells	6.05	31908	40278	1045	1:B,4
22	MJ36	Cells	6.06	15691	37774	694	1:B,8
23	MJ40	Cells	6.06	20672	45292	2399	1:C,4
24	MJ44	Cells	6.06	16105	50700	1260	1:C,8
25	MJ48	Cells	6.06	26072	43568	1008	1:D,4
26	MJ52	Cells	6.06	32129	44936	1906	1:D,8
27	MJ33	Cells	6.07	34691	53633	1427	1:B,5
28	MJ37	Cells	6.07	28222	47421	1782	1:C,1
29	MJ41	Cells	6.07	23460	50777	1378	1:C,5
30	MJ45	Cells	6.07	24654	57854	1817	1:D,1
31	MJ49	Cells	6.08	21858	47735	1114	1:D,5
32	MJ53	Cells	6.07	23820	42885	1172	1:E,1
33	MJ107	Calibration curve_2_new vial_same rc	6.08	34	10293	3	2:D,8
34	MJ108	Calibration curve_2	6.09	59	10806	6	2:E,1
35	MJ109	Calibration curve_2	6.09	153	11943	11	2:E,2
36	MJ110	Calibration curve_2	6.08	482	13428	36	2:E,3
37	MJ111	Calibration curve_2	6.09	1793	13498	53	2:E,4
38	MJ112	Calibration curve_2	6.09	5016	13214	461	2:E,5
39	MJ113	Calibration curve_2	6.09	18587	12864	1559	2:E,6
40	MJ114	Calibration curve_2	6.09	57788	14452	2154	2:E,7
41	MJ54	Cells	6.07	68668	60516	1509	1:E,2
42	MJ59	Cells	6.07	51611	66649	2254	1:E,7
43	MJ64	Cells	6.08	58550	66219	4038	1:F,4
44	MJ69	Cells	6.08	41625	61905	1435	2:A,1
45	MJ74	Cells	6.07	59051	66162	1518	2:A,6
46	MJ79	Cells	6.07	52033	64918	1158	2:B,3
47	MJ84	Cells	6.07	47143	61955	1974	2:B,8
48	MJ89	Cells	6.07	55896	62447	70	2:C,5
49	MJ94	Cells	6.07	62762	54521	2483	2:D,2
50	MJ55	Cells	6.07	42305	55371	1921	1:E,3
51	MJ60	Cells	6.07	49133	61277	4624	1:E,8
52	MJ65	Cells	6.07	45313	64423	4471	1:F,5
53	MJ70	Cells	6.07	73080	68734	44	2:A,2
54	MJ75	Cells	6.08	60589	69915	1711	2:A,7
55	MJ80	Cells	6.08	41516	653	1785	2:B,4
56	MJ85	Cells	6.08	36247	60040	1174	2:C,1
57	MJ90	Cells	6.07	52276	54996	1698	2:C,6
58	MJ95	Cells	6.07	49371	53557	1349	2:D,3
59	MJ56	Cells	6.08	43223	54391	126	1:E,4
60	MJ61	Cells	6.08	44055	55798	4933	1:F,1
61	MJ66	Cells	6.07	44689	64939	1451	1:F,6
62	MJ71	Cells	6.08	49501	73895	1363	2:A,3
63	MJ76	Cells	6.07	41376	55193	2167	2:A,8
64	MJ81	Cells	6.08	39290	939	848	2:B,5
65	MJ86	Cells	6.08	39934	67591	2275	2:C,2
66	MJ91	Cells	6.08	50947	65559	1659	2:C,7
67	MJ96	Cells	6.08	45310	56005	1729	2:D,4
68	MJ57	Cells	6.08	30791	65894	1645	1:E,5
69	MJ62	Cells	6.07	43468	59990	1502	1:F,2
70	MJ67	Cells	6.06	27618	69915	738	1:F,7
71	MJ72	Cells	6.06	51229	74905	1208	2:A,4
72	MJ77	Cells	6.05	57632	77846	3304	2:B,1
73	MJ82	Cells	6.05	42643	66581	1032	2:B,6
74	MJ87	Cells	6.06	47058	68312	2016	2:C,3
75	MJ92	Cells	6.07	56321	71754	1423	2:C,8
76	MJ97	Cells	6.07	44478	63051	1896	2:D,5
77	MJ58	Cells	6.07	38553	68088	2321	1:E,6
78	MJ63	Cells	6.07	39968	67074	2683	1:F,3
79	MJ68	Cells	6.08	41993	72322	1514	1:F,8
80	MJ73	Cells	6.08	45202	72568	1254	2:A,5
81	MJ78	Cells	6.08	48275	71161	1201	2:B,2
82	MJ83	Cells	6.08	48782	65957	1248	2:B,7
83	MJ88	Cells	6.08	53095	68873	1924	2:C,4
84	MJ93	Cells	6.08	42592	67549	1237	2:D,1
85	MJ98	Cells	6.09	39833	62223	37	2:D,6
AEA (20:4)
	ID	Sample Text	RT	Area	IS Area	S/N	Vial
1	MJ99	Calibration curve_1	4.19	62	15833	4	1:A,2
2	MJ100	Calibration curve_1	4.18	52	14536	3	1:A,3
3	MJ101	Calibration curve_1	4.18	152	16427	10	1:A,4
4	MJ102	Calibration curve_1	4.18	454	18527	22	1:A,5
5	MJ103	Calibration curve_1	4.18	1136	20312	58	1:A,6
6	MJ104	Calibration curve_1	4.18	3587	21571	145	1:A,7
7	MJ105	Calibration curve_1	4.18	11753	21420	628	1:A,8
8	MJ106	Calibration curve_1	4.18	35815	22193	1475	1:B,1
9	MJ30	Cells	4.18	22098	16644	494	1:B,2
10	MJ34	Cells	4.19	25053	21555	787	1:B,6
11	MJ38	Cells	4.19	24465	20437	1023	1:C,2
12	MJ42	Cells	4.19	21706	18144	562	1:C,6
13	MJ46	Cells	4.19	16675	14602	572	1:D,2
14	MJ50	Cells	4.19	13744	12767	631	1:D,6
15	MJ31	Cells	4.19	12942	12640	531	1:B,3
16	MJ35	Cells	4.19	10818	11777	412	1:B,7
17	MJ39	Cells	4.19	18315	15312	455	1:C,3
18	MJ43	Cells	4.19	18061	17328	670	1:C,7
19	MJ47	Cells	4.19	12393	12422	290	1:D,3
20	MJ51	Cells	4.19	13213	13411	512	1:D,7
21	MJ32	Cells	4.19	12732	10807	631	1:B,4
22	MJ36	Cells	4.19	12568	10969	460	1:B,8
23	MJ40	Cells	4.19	17041	15157	362	1:C,4
24	MJ44	Cells	4.19	11713	17809	302	1:C,8
25	MJ48	Cells	4.19	15692	13745	211	1:D,4
26	MJ52	Cells	4.19	13674	13145	357	1:D,8
27	MJ33	Cells	4.19	15017	12252	197	1:B,5
28	MJ37	Cells	4.19	14828	11651	598	1:C,1
29	MJ41	Cells	4.19	21229	16834	743	1:C,5
30	MJ45	Cells	4.20	20919	17456	649	1:D,1
31	MJ49	Cells	4.20	16617	12346	139	1:D,5
32	MJ53	Cells	4.20	15177	12079	437	1:E,1
33	MJ107	Calibration curve_2_new vial_same rc	4.20	30	16368	3	2:D,8
34	MJ108	Calibration curve_2	4.19	108	16868	21	2:E,1
35	MJ109	Calibration curve_2	4.21	149	18305	47	2:E,2
36	MJ110	Calibration curve_2	4.20	484	19088	36	2:E,3
37	MJ111	Calibration curve_2	4.20	1464	22490	69	2:E,4
38	MJ112	Calibration curve_2	4.20	3462	21176	134	2:E,5
39	MJ113	Calibration curve_2	4.20	11442	20725	288	2:E,6
40	MJ114	Calibration curve_2	4.20	34743	22917	3030	2:E,7
41	MJ54	Cells	4.20	19678	23048	184	1:E,2
42	MJ59	Cells	4.20	24876	24019	646	1:E,7
43	MJ64	Cells	4.20	30922	24063	877	1:F,4
44	MJ69	Cells	4.20	24083	23056	1466	2:A,1
45	MJ74	Cells	4.20	23942	21085	642	2:A,6
46	MJ79	Cells	4.20	30081	22060	509	2:B,3
47	MJ84	Cells	4.20	20406	19318	589	2:B,8
48	MJ89	Cells	4.20	17758	17166	583	2:C,5
49	MJ94	Cells	4.20	21374	15664	729	2:D,2
50	MJ55	Cells	4.20	14105	13920	184	1:E,3
51	MJ60	Cells	4.20	15372	15395	385	1:E,8
52	MJ65	Cells	4.20	20297	19299	420	1:F,5
53	MJ70	Cells	4.20	19938	19527	632	2:A,2
54	MJ75	Cells	4.20	21654	19526	850	2:A,7
55	MJ80	Cells	4.20	27918	3355	486	2:B,4
56	MJ85	Cells	4.20	19262	18214	630	2:C,1
57	MJ90	Cells	4.20	19326	16837	508	2:C,6
58	MJ95	Cells	4.20	21433	14298	580	2:D,3
59	MJ56	Cells	4.20	14243	14765	239	1:E,4
60	MJ61	Cells	4.20	16181	15214	531	1:F,1
61	MJ66	Cells	4.20	21976	17934	775	1:F,6
62	MJ71	Cells	4.20	19053	20226	456	2:A,3
63	MJ76	Cells	4.20	20578	16212	373	2:A,8
64	MJ81	Cells	4.20	25996		1232	2:B,5
65	MJ86	Cells	4.20	20273	18638	523	2:C,2
66	MJ91	Cells	4.20	21478	16138	595	2:C,7
67	MJ96	Cells	4.20	23353	15222	736	2:D,4
68	MJ57	Cells	4.21	11852	15263	521	1:E,5
69	MJ62	Cells	4.21	14501	18596	819	1:F,2
70	MJ67	Cells	4.20	17104	20989	289	1:F,7
71	MJ72	Cells	4.20	15769	24530	528	2:A,4
72	MJ77	Cells	4.20	10949	21558	482	2:B,1
73	MJ82	Cells	4.19	20628	19417	607	2:B,6
74	MJ87	Cells	4.20	15683	18290	436	2:C,3
75	MJ92	Cells	4.20	16079	18213	213	2:C,8
76	MJ97	Cells	4.20	19528	15464	880	2:D,5
77	MJ58	Cells	4.20	15454	17132	282	1:E,6
78	MJ63	Cells	4.20	15701	16105	566	1:F,3
79	MJ68	Cells	4.20	22403	18650	696	1:F,8
80	MJ73	Cells	4.21	21210	21293	376	2:A,5
81	MJ78	Cells	4.20	21375	19338	253	2:B,2
82	MJ83	Cells	4.20	25467	17149	468	2:B,7
83	MJ88	Cells	4.20	19588	19163	586	2:C,4
84	MJ93	Cells	4.20	19706	15523	746	2:D,1
85	MJ98	Cells	4.20	25361	14550	1259	2:D,6
2-AG-d8 (20:4)
	ID	Sample Text	RT	Area	IS Area	S/N	Vial
1	MJ99	Calibration curve_1	4.81	1535		18	1:A,2
2	MJ100	Calibration curve_1	4.81	1180		13	1:A,3
3	MJ101	Calibration curve_1	4.82	1355		5	1:A,4
4	MJ102	Calibration curve_1	4.82	1581		76	1:A,5
5	MJ103	Calibration curve_1	4.81	1801		76	1:A,6
6	MJ104	Calibration curve_1	4.81	2220		25	1:A,7
7	MJ105	Calibration curve_1	4.82	1572		39	1:A,8
8	MJ106	Calibration curve_1	4.82	2550		7	1:B,1
9	MJ30	Cells					1:B,2
10	MJ34	Cells	4.82	1969		41	1:B,6
11	MJ38	Cells	4.82	2034		93	1:C,2
12	MJ42	Cells	4.83	1811		23	1:C,6
13	MJ46	Cells	4.83	1434		35	1:D,2
14	MJ50	Cells	4.82	1110		64	1:D,6
15	MJ31	Cells	4.82	1301		20	1:B,3
16	MJ35	Cells	4.81	559		24	1:B,7
17	MJ39	Cells	4.82	1362		50	1:C,3
18	MJ43	Cells	4.83	1683		67	1:C,7
19	MJ47	Cells	4.82	821		12	1:D,3
20	MJ51	Cells	4.83	1368		53	1:D,7
21	MJ32	Cells	4.82	1264		15	1:B,4
22	MJ36	Cells					1:B,8
23	MJ40	Cells	4.83	1318		46	1:C,4
24	MJ44	Cells	4.83	1549		83	1:C,8
25	MJ48	Cells	4.83	1555		11	1:D,4
26	MJ52	Cells	4.83	1319		8	1:D,8
27	MJ33	Cells	4.83	1198		10	1:B,5
28	MJ37	Cells	4.83	1263		49	1:C,1
29	MJ41	Cells	4.84	1514		80	1:C,5
30	MJ45	Cells	4.83	1099		37	1:D,1
31	MJ49	Cells					1:D,5
32	MJ53	Cells	4.84	959		83	1:E,1
33	MJ107	Calibration curve_2_new vial_same rc	4.85	993		28	2:D,8
34	MJ108	Calibration curve_2	4.84	1293		36	2:E,1
35	MJ109	Calibration curve_2	4.84	1785		22	2:E,2
36	MJ110	Calibration curve_2	4.84	1769		52	2:E,3
37	MJ111	Calibration curve_2	4.84	1808		120	2:E,4
38	MJ112	Calibration curve_2	4.84	2226		146	2:E,5
39	MJ113	Calibration curve_2	4.84	2005		22	2:E,6
40	MJ114	Calibration curve_2	4.83	1816		14	2:E,7
41	MJ54	Cells	4.84	1324		93	1:E,2
42	MJ59	Cells	4.84	1984		60	1:E,7
43	MJ64	Cells	4.84	1253		16	1:F,4
44	MJ69	Cells	4.84	1647		14	2:A,1
45	MJ74	Cells	4.84	1569		21	2:A,6
46	MJ79	Cells	4.84	1783		32991	2:B,3
47	MJ84	Cells	4.83	1969		59	2:B,8
48	MJ89	Cells	4.84	1856		115	2:C,5
49	MJ94	Cells	4.83	952		16	2:D,2
50	MJ55	Cells	4.84	987		19655	1:E,3
51	MJ60	Cells	4.84	1423		12	1:E,8
52	MJ65	Cells	4.84	1335		13	1:F,5
53	MJ70	Cells	4.84	1701		28	2:A,2
54	MJ75	Cells	4.84	1507		7	2:A,7
55	MJ80	Cells					2:B,4
56	MJ85	Cells	4.85	1606		6	2:C,1
57	MJ90	Cells					2:C,6
58	MJ95	Cells	4.83	859		14201	2:D,3
59	MJ56	Cells	4.84	1026		11	1:E,4
60	MJ61	Cells	4.84	1304		8	1:F,1
61	MJ66	Cells	4.83	1639		54	1:F,6
62	MJ71	Cells	4.58	4		0	2:A,3
63	MJ76	Cells	4.84	1174		36	2:A,8
64	MJ81	Cells	4.82	12		309	2:B,5
65	MJ86	Cells	4.84	1387		23	2:C,2
66	MJ91	Cells	4.85	1394		23	2:C,7
67	MJ96	Cells	4.84	1605		30	2:D,4
68	MJ57	Cells	4.84	1445		20	1:E,5
69	MJ62	Cells	4.84	1584		47	1:F,2
70	MJ67	Cells	4.83	1798		20	1:F,7
71	MJ72	Cells	4.84	2007		38	2:A,4
72	MJ77	Cells	4.83	1311		31	2:B,1
73	MJ82	Cells	4.58	3		2	2:B,6
74	MJ87	Cells	4.84	1220		243	2:C,3
75	MJ92	Cells					2:C,8
76	MJ97	Cells	4.84	1200		33	2:D,5
77	MJ58	Cells	4.84	1616		17	1:E,6
78	MJ63	Cells	4.84	1509		7	1:F,3
79	MJ68	Cells	4.84	1156		20	1:F,8
80	MJ73	Cells	4.85	1822		49	2:A,5
81	MJ78	Cells	4.84	1676		13	2:B,2
82	MJ83	Cells	4.84	1800		43	2:B,7
83	MJ88	Cells	4.84	1928		131	2:C,4
84	MJ93	Cells	4.85	1323		244	2:D,1
85	MJ98	Cells	4.85	1261		30	2:D,6
AEA-d8 (20:4)
	ID	Sample Text	RT	Area	IS Area	S/N	Vial
1	MJ99	Calibration curve_1	4.14	15833		656	1:A,2
2	MJ100	Calibration curve_1	4.14	14536		345	1:A,3
3	MJ101	Calibration curve_1	4.13	16427		321	1:A,4
4	MJ102	Calibration curve_1	4.14	18527		377	1:A,5
5	MJ103	Calibration curve_1	4.14	20312		1132	1:A,6
6	MJ104	Calibration curve_1	4.14	21571		440	1:A,7
7	MJ105	Calibration curve_1	4.14	21420		358	1:A,8
8	MJ106	Calibration curve_1	4.14	22193		351	1:B,1
9	MJ30	Cells	4.14	16644		737	1:B,2
10	MJ34	Cells	4.14	21555		955	1:B,6
11	MJ38	Cells	4.14	20437		567	1:C,2
12	MJ42	Cells	4.14	18144		1182	1:C,6
13	MJ46	Cells	4.14	14602		673	1:D,2
14	MJ50	Cells	4.15	12767		1275	1:D,6
15	MJ31	Cells	4.14	12640		714	1:B,3
16	MJ35	Cells	4.15	11777		569	1:B,7
17	MJ39	Cells	4.15	15312		511	1:C,3
18	MJ43	Cells	4.14	17328		1062	1:C,7
19	MJ47	Cells	4.15	12422		608	1:D,3
20	MJ51	Cells	4.14	13411		1088	1:D,7
21	MJ32	Cells	4.15	10807		256259	1:B,4
22	MJ36	Cells	4.14	10969		187	1:B,8
23	MJ40	Cells	4.15	15157		310	1:C,4
24	MJ44	Cells	4.14	17809		393	1:C,8
25	MJ48	Cells	4.15	13745		1039	1:D,4
26	MJ52	Cells	4.15	13145		1101	1:D,8
27	MJ33	Cells	4.15	12252		366	1:B,5
28	MJ37	Cells	4.15	11651		616	1:C,1
29	MJ41	Cells	4.15	16834		1104	1:C,5
30	MJ45	Cells	4.15	17456		637	1:D,1
31	MJ49	Cells	4.15	12346		347	1:D,5
32	MJ53	Cells	4.15	12079		69	1:E,1
33	MJ107	Calibration curve_2_new vial_same rc	4.15	16368		328	2:D,8
34	MJ108	Calibration curve_2	4.15	16868		778	2:E,1
35	MJ109	Calibration curve_2	4.15	18305		184	2:E,2
36	MJ110	Calibration curve_2	4.15	19088		591	2:E,3
37	MJ111	Calibration curve_2	4.15	22490		442	2:E,4
38	MJ112	Calibration curve_2	4.15	21176		631	2:E,5
39	MJ113	Calibration curve_2	4.15	20725		770	2:E,6
40	MJ114	Calibration curve_2	4.15	22917		493	2:E,7
41	MJ54	Cells	4.15	23048		478	1:E,2
42	MJ59	Cells	4.16	24019		452	1:E,7
43	MJ64	Cells	4.16	24063		733	1:F,4
44	MJ69	Cells	4.15	23056		734	2:A,1
45	MJ74	Cells	4.15	21085		1359	2:A,6
46	MJ79	Cells	4.15	22060		1033	2:B,3
47	MJ84	Cells	4.15	19318		1457	2:B,8
48	MJ89	Cells	4.15	17166		330	2:C,5
49	MJ94	Cells	4.15	15664		1070	2:D,2
50	MJ55	Cells	4.16	13920		190	1:E,3
51	MJ60	Cells	4.15	15395		431	1:E,8
52	MJ65	Cells	4.15	19299		271	1:F,5
53	MJ70	Cells	4.16	19527		1154	2:A,2
54	MJ75	Cells	4.16	19526		262	2:A,7
55	MJ80	Cells	4.23	3355		119	2:B,4
56	MJ85	Cells	4.16	18214		416	2:C,1
57	MJ90	Cells	4.16	16837		537	2:C,6
58	MJ95	Cells	4.16	14298		490	2:D,3
59	MJ56	Cells	4.16	14765		337547	1:E,4
60	MJ61	Cells	4.16	15214		1115	1:F,1
61	MJ66	Cells	4.16	17934		397094	1:F,6
62	MJ71	Cells	4.16	20226		620	2:A,3
63	MJ76	Cells	4.16	16212		620	2:A,8
64	MJ81	Cells					2:B,5
65	MJ86	Cells	4.16	18638		1611	2:C,2
66	MJ91	Cells	4.16	16138		839	2:C,7
67	MJ96	Cells	4.16	15222		888	2:D,4
68	MJ57	Cells	4.16	15263		24	1:E,5
69	MJ62	Cells	4.16	18596		1967	1:F,2
70	MJ67	Cells	4.16	20989		574	1:F,7
71	MJ72	Cells	4.16	24530		551424	2:A,4
72	MJ77	Cells	4.15	21558		2009	2:B,1
73	MJ82	Cells	4.15	19417		1560	2:B,6
74	MJ87	Cells	4.15	18290		1245	2:C,3
75	MJ92	Cells	4.15	18213		242	2:C,8
76	MJ97	Cells	4.16	15464		697	2:D,5
77	MJ58	Cells	4.16	17132		380476	1:E,6
78	MJ63	Cells	4.16	16105		1457	1:F,3
79	MJ68	Cells	4.16	18650		537	1:F,8
80	MJ73	Cells	4.16	21293		961	2:A,5
81	MJ78	Cells	4.16	19338		109	2:B,2
82	MJ83	Cells	4.16	17149		1121	2:B,7
83	MJ88	Cells	4.16	19163		400	2:C,4
84	MJ93	Cells	4.16	15523		713	2:D,1
85	MJ98	Cells	4.16	14550		2117	2:D,6
AA-d8 (FA 20:4)
	ID	Sample Text	RT	Area	IS Area	S/N	Vial
1	MJ99	Calibration curve_1	5.98	6071		520	1:A,2
2	MJ100	Calibration curve_1	5.98	6081		32	1:A,3
3	MJ101	Calibration curve_1	5.98	6837		77	1:A,4
4	MJ102	Calibration curve_1	5.98	8687		583	1:A,5
5	MJ103	Calibration curve_1	5.98	9273		116	1:A,6
6	MJ104	Calibration curve_1	5.98	10430		839	1:A,7
7	MJ105	Calibration curve_1	5.99	10783		692	1:A,8
8	MJ106	Calibration curve_1	5.99	11550		47	1:B,1
9	MJ30	Cells	6.00	41742		91	1:B,2
10	MJ34	Cells	6.00	45560		4507	1:B,6
11	MJ38	Cells	6.00	46475		851	1:C,2
12	MJ42	Cells	6.00	43037		2064	1:C,6
13	MJ46	Cells	6.00	39451		4199	1:D,2
14	MJ50	Cells	6.00	42417		6017	1:D,6
15	MJ31	Cells	6.00	44021		1708	1:B,3
16	MJ35	Cells	6.00	35261		111	1:B,7
17	MJ39	Cells	6.00	38211		2892	1:C,3
18	MJ43	Cells	6.00	53069		3322	1:C,7
19	MJ47	Cells	6.00	40333		5868	1:D,3
20	MJ51	Cells	6.00	44402		3215	1:D,7
21	MJ32	Cells	6.00	40278		7527	1:B,4
22	MJ36	Cells	6.00	37774		3856	1:B,8
23	MJ40	Cells	6.00	45292		4356	1:C,4
24	MJ44	Cells	6.01	50700		5433	1:C,8
25	MJ48	Cells	6.01	43568		154	1:D,4
26	MJ52	Cells	6.01	44936		7020	1:D,8
27	MJ33	Cells	6.01	53633		8090	1:B,5
28	MJ37	Cells	6.01	47421		5333	1:C,1
29	MJ41	Cells	6.02	50777		5378	1:C,5
30	MJ45	Cells	6.01	57854		8440	1:D,1
31	MJ49	Cells	6.03	47735		3948	1:D,5
32	MJ53	Cells	6.03	42885		5693	1:E,1
33	MJ107	Calibration curve_2_new vial_same rc	6.02	10293		1524	2:D,8
34	MJ108	Calibration curve_2	6.01	10806		1317	2:E,1
35	MJ109	Calibration curve_2	6.01	11943		1442	2:E,2
36	MJ110	Calibration curve_2	6.01	13428		663	2:E,3
37	MJ111	Calibration curve_2	6.02	13498		1082	2:E,4
38	MJ112	Calibration curve_2	6.01	13214		1487	2:E,5
39	MJ113	Calibration curve_2	6.02	12864		45	2:E,6
40	MJ114	Calibration curve_2	6.02	14452		601	2:E,7
41	MJ54	Cells	6.03	60516		97	1:E,2
42	MJ59	Cells	6.02	66649		6416	1:E,7
43	MJ64	Cells	6.02	66219		8256	1:F,4
44	MJ69	Cells	6.02	61905		83	2:A,1
45	MJ74	Cells	6.02	66162		2659	2:A,6
46	MJ79	Cells	6.02	64918		4600	2:B,3
47	MJ84	Cells	6.02	61955		327	2:B,8
48	MJ89	Cells	6.02	62447		8139	2:C,5
49	MJ94	Cells	6.02	54521		97	2:D,2
50	MJ55	Cells	6.02	55371		4541	1:E,3
51	MJ60	Cells	6.02	61277		2596	1:E,8
52	MJ65	Cells	6.02	64423		6234	1:F,5
53	MJ70	Cells	6.02	68734		5540	2:A,2
54	MJ75	Cells	6.02	69915		5171	2:A,7
55	MJ80	Cells	6.02	653		100	2:B,4
56	MJ85	Cells	6.02	60040		310	2:C,1
57	MJ90	Cells	6.03	54996		2770	2:C,6
58	MJ95	Cells	6.02	53557		11928	2:D,3
59	MJ56	Cells	6.03	54391		47	1:E,4
60	MJ61	Cells	6.03	55798		11440	1:F,1
61	MJ66	Cells	6.02	64939		5251	1:F,6
62	MJ71	Cells	6.02	73895		5071	2:A,3
63	MJ76	Cells	6.02	55193		234	2:A,8
64	MJ81	Cells	6.03	939		187	2:B,5
65	MJ86	Cells	6.03	67591		5532	2:C,2
66	MJ91	Cells	6.02	65559		17372	2:C,7
67	MJ96	Cells	6.03	56005		4959	2:D,4
68	MJ57	Cells	6.03	65894		3211	1:E,5
69	MJ62	Cells	6.02	59990		3178	1:F,2
70	MJ67	Cells	6.02	69915		7743	1:F,7
71	MJ72	Cells	6.01	74905		1892	2:A,4
72	MJ77	Cells	6.00	77846		6958	2:B,1
73	MJ82	Cells	6.00	66581		4867	2:B,6
74	MJ87	Cells	6.01	68312		9145	2:C,3
75	MJ92	Cells	6.01	71754		375	2:C,8
76	MJ97	Cells	6.01	63051		3499	2:D,5
77	MJ58	Cells	6.03	68088		8420	1:E,6
78	MJ63	Cells	6.02	67074		6059	1:F,3
79	MJ68	Cells	6.02	72322		6123	1:F,8
80	MJ73	Cells	6.03	72568		5044	2:A,5
81	MJ78	Cells	6.03	71161		7515	2:B,2
82	MJ83	Cells	6.03	65957		4899	2:B,7
83	MJ88	Cells	6.03	68873		7081	2:C,4
84	MJ93	Cells	6.03	67549		5257	2:D,1
85	MJ98	Cells	6.03	62223		5920	2:D,6
[truncated: 38 more columns]

## Sheet: Figure 4a
Time (hours)	i.v.			o.p.
0	0	0	0	0	0	0
0.083333	8440	12000	9730	654	1030	580
0.25	7140	5880	7530	2000	2110	1400
0.5	2720	3500	2390	3010	2640	1650
1	1970	2460	1500	2250	2230	1460
2	592	884	1090	915	806	296
7	114	59.9	55.5	395	195	170
12	30.6	36.7	45.5	71.9	63.7	132
24	6.7	3.6	6.4	61.3	89.5	56.8

## Sheet: Figure 4b,c,d
IN VIVO STUDY 1
Brain samples
100mg tissue/ml MeOH		nM = pmol/ml	2-AG, AA 1/100 diluted
2-Arachidonyl-glycerol
slope	0.00205854
	Name	Sample Text	Quan Trace	RT	Area	IS Area	Response	Type	Std. Conc	nM	Vial	Acq.Date	Acq.Time	%Dev	Conc. Dev. Flagged	2-AG (nM)
1	20210719_MAGL2_TE_RO7527449_Brain_2_001	Solvent (MeOH) dbl blank	379.24 > 287.21					Solvent			2:H,12	2021-07-20	0.456933		NO	0
2	20210719_MAGL2_TE_RO7527449_Brain_2_002	Blank	379.24 > 287.21	3.96	58150	525701	0.111	Standard	0		2:A,1	2021-07-20	0.462315		NO	53.9217
3	20210719_MAGL2_TE_RO7527449_Brain_2_003	Standard 9	379.24 > 287.21	3.97	117715	544007	0.216	Standard	39	41.9	2:A,2	2021-07-20	0.46765	7.5	NO	104.929
4	20210719_MAGL2_TE_RO7527449_Brain_2_004	Standard 8	379.24 > 287.21	3.97	131468	447138	0.294	Standard	78	79.7	2:A,3	2021-07-20	0.472986	2.1	NO	142.82
5	20210719_MAGL2_TE_RO7527449_Brain_2_005	Standard 7	379.24 > 287.21	3.97	23043	48682	0.473	Standard	156	166.8	2:A,4	2021-07-20	0.478322	6.9	NO	229.775
6	20210719_MAGL2_TE_RO7527449_Brain_2_006	Standard 6	379.24 > 287.21	3.97	359726	447664	0.804	Standard	312	327.2	2:A,5	2021-07-20	0.483669	4.9	NO	390.568
7	20210719_MAGL2_TE_RO7527449_Brain_2_007	Standard 5	379.24 > 287.21	3.97	103147	68350	1.509	Standard	625	669.9	2:A,6	2021-07-20	0.489005	7.2	NO	733.044
8	20210719_MAGL2_TE_RO7527449_Brain_2_008	Standard 4	379.24 > 287.21	3.97	1444822	548910	2.632	Standard	1250	1215.5	2:A,7	2021-07-20	0.49434	-2.8	NO	1278.58
9	20210719_MAGL2_TE_RO7527449_Brain_2_009	Standard 3	379.24 > 287.21	3.97	2548870	490910	5.192	Standard	2500	2459.1	2:A,8	2021-07-20	0.499688	-1.6	NO	2522.18
10	20210719_MAGL2_TE_RO7527449_Brain_2_010	Standard 2	379.24 > 287.21	3.97	4117213	460903	8.933	Standard	5000	4276.3	2:A,9	2021-07-20	0.505023	-14.5	NO	4339.48
11	20210719_MAGL2_TE_RO7527449_Brain_2_011	Standard 1	379.24 > 287.21	3.97	5896484	417864	14.111	Standard	10000	6791.7	2:A,10	2021-07-20	0.510359	-32.1	YES	6854.86
12	20210719_MAGL2_TE_RO7527449_Brain_2_012	Solvent (MeOH) dbl blank	379.24 > 287.21	3.97	1998			Solvent			2:H,12	2021-07-20	0.515683		NO	0
13	20210719_MAGL2_TE_RO7527449_Brain_2_013	Solvent (MeOH) dbl blank	379.24 > 287.21					Solvent			2:H,12	2021-07-20	0.52103		NO	0
14	20210719_MAGL2_TE_RO7527449_Brain_2_014	Sample 1	379.24 > 287.21	3.97	16467	711256	0.023	Analyte			2:B,1	2021-07-20	0.526366		NO	11.173
15	20210719_MAGL2_TE_RO7527449_Brain_2_015	Sample 2	379.24 > 287.21	3.97	16698	678497	0.025	Analyte			2:B,2	2021-07-20	0.531701		NO	12.1445
16	20210719_MAGL2_TE_RO7527449_Brain_2_016	Sample 3	379.24 > 287.21	3.97	15549	650830	0.024	Analyte			2:B,3	2021-07-20	0.537025		NO	11.6587
17	20210719_MAGL2_TE_RO7527449_Brain_2_017	Sample 4	379.24 > 287.21	3.97	15572	604033	0.026	Analyte			2:B,4	2021-07-20	0.542361		NO	12.6303
18	20210719_MAGL2_TE_RO7527449_Brain_2_018	Sample 5	379.24 > 287.21	3.98	15217	717631	0.021	Analyte			2:B,5	2021-07-20	0.547697		NO	10.2014
19	20210719_MAGL2_TE_RO7527449_Brain_2_019	Sample 6	379.24 > 287.21	3.97	18230	733252	0.025	Analyte			2:B,6	2021-07-20	0.553032		NO	12.1445
20	20210719_MAGL2_TE_RO7527449_Brain_2_020	Sample 7	379.24 > 287.21	3.97	118321	586279	0.202	Analyte		34.9	2:B,7	2021-07-20	0.558368		NO	98.1278
21	20210719_MAGL2_TE_RO7527449_Brain_2_021	Sample 8	379.24 > 287.21	3.97	140929	625183	0.225	Analyte		46.3	2:B,8	2021-07-20	0.563704		NO	109.301
22	20210719_MAGL2_TE_RO7527449_Brain_2_022	Sample 9	379.24 > 287.21	3.97	137347	596511	0.23	Analyte		48.7	2:B,9	2021-07-20	0.569039		NO	111.73
23	20210719_MAGL2_TE_RO7527449_Brain_2_023	Sample 10	379.24 > 287.21	3.97	159078	754197	0.211	Analyte		39.3	2:B,10	2021-07-20	0.574387		NO	102.5
24	20210719_MAGL2_TE_RO7527449_Brain_2_024	Sample 11	379.24 > 287.21	3.97	148768	702451	0.212	Analyte		39.7	2:B,11	2021-07-20	0.579711		NO	102.986
25	20210719_MAGL2_TE_RO7527449_Brain_2_025	Sample 12	379.24 > 287.21	3.97	180336	760233	0.237	Analyte		52.1	2:B,12	2021-07-20	0.585058		NO	115.13
26	20210719_MAGL2_TE_RO7527449_Brain_2_026	Sample 13	379.24 > 287.21	3.97	11702	762274	0.015	Analyte			2:C,1	2021-07-20	0.590394		NO	7.28672
27	20210719_MAGL2_TE_RO7527449_Brain_2_027	Sample 14	379.24 > 287.21	3.97	10840	687277	0.016	Analyte			2:C,2	2021-07-20	0.595729		NO	7.7725
28	20210719_MAGL2_TE_RO7527449_Brain_2_028	Sample 15	379.24 > 287.21	3.97	9882	613262	0.016	Analyte			2:C,3	2021-07-20	0.601065		NO	7.7725
29	20210719_MAGL2_TE_RO7527449_Brain_2_029	Sample 16	379.24 > 287.21	3.97	14877	699843	0.021	Analyte			2:C,4	2021-07-20	0.6064		NO	10.2014
30	20210719_MAGL2_TE_RO7527449_Brain_2_030	Sample 17	379.24 > 287.21	3.97	12266	534134	0.023	Analyte			2:C,5	2021-07-20	0.611736		NO	11.173
31	20210719_MAGL2_TE_RO7527449_Brain_2_031	Sample 18	379.24 > 287.21	3.97	11534	620423	0.019	Analyte			2:C,6	2021-07-20	0.617072		NO	9.22984
32	20210719_MAGL2_TE_RO7527449_Brain_2_032	Solvent (MeOH) dbl blank	379.24 > 287.21					Solvent			2:H,12	2021-07-20	0.622407		NO	0
33	20210719_MAGL2_TE_RO7527449_Brain_2_033	Solvent (MeOH) dbl blank	379.24 > 287.21					Solvent			2:H,12	2021-07-20	0.627755		NO	0
Arachidonic acid
slope	0.00217084
	Name	Sample Text	Quan Trace	RT	Area	IS Area	Response	Type	Std. Conc	nM	Vial	Acq.Date	Acq.Time	%Dev	Conc. Dev. Flagged	AA (nM)
1	20210719_MAGL2_TE_RO7527449_Brain_2_001	Solvent (MeOH) dbl blank	303.14 > 259.16					Solvent			2:H,12	2021-07-20	0.456933		NO	0
2	20210719_MAGL2_TE_RO7527449_Brain_2_002	Blank	303.14 > 259.16	4.48	31302	137697	0.227	Standard	0		2:A,1	2021-07-20	0.462315		NO	104.568
3	20210719_MAGL2_TE_RO7527449_Brain_2_003	Standard 9	303.14 > 259.16	4.49	58987	138789	0.425	Standard	78	81.6	2:A,2	2021-07-20	0.46765	4.7	NO	195.777
4	20210719_MAGL2_TE_RO7527449_Brain_2_004	Standard 8	303.14 > 259.16	4.49	64835	110899	0.585	Standard	156	155.2	2:A,3	2021-07-20	0.472986	-0.5	NO	269.481
5	20210719_MAGL2_TE_RO7527449_Brain_2_005	Standard 7	303.14 > 259.16	4.49	24268	24534	0.989	Standard	312	341.5	2:A,4	2021-07-20	0.478322	9.5	NO	455.584
6	20210719_MAGL2_TE_RO7527449_Brain_2_006	Standard 6	303.14 > 259.16	4.5	177048	108329	1.634	Standard	625	638.7	2:A,5	2021-07-20	0.483669	2.2	NO	752.704
7	20210719_MAGL2_TE_RO7527449_Brain_2_007	Standard 5	303.14 > 259.16	4.49	83275	29102	2.861	Standard	1250	1204	2:A,6	2021-07-20	0.489005	-3.7	NO	1317.92
8	20210719_MAGL2_TE_RO7527449_Brain_2_008	Standard 4	303.14 > 259.16	4.5	573411	129838	4.416	Standard	2500	1920.2	2:A,7	2021-07-20	0.49434	-23.2	YES	2034.24
9	20210719_MAGL2_TE_RO7527449_Brain_2_009	Standard 3	303.14 > 259.16	4.5	879227	113814	7.725	Standard	5000	3444.4	2:A,8	2021-07-20	0.499688	-31.1	YES	3558.53
10	20210719_MAGL2_TE_RO7527449_Brain_2_010	Standard 2	303.14 > 259.16	4.5	1207875	101811	11.864	Standard	10000	5350.9	2:A,9	2021-07-20	0.505023	-46.5	YES	5465.17
11	20210719_MAGL2_TE_RO7527449_Brain_2_011	Standard 1	303.14 > 259.16	4.5	1551719	89644	17.31	Standard	20000	7859.6	2:A,10	2021-07-20	0.510359	-60.7	YES	7973.87
12	20210719_MAGL2_TE_RO7527449_Brain_2_012	Solvent (MeOH) dbl blank	303.14 > 259.16	4.5	4374			Solvent			2:H,12	2021-07-20	0.515683		NO	0
13	20210719_MAGL2_TE_RO7527449_Brain_2_013	Solvent (MeOH) dbl blank	303.14 > 259.16	4.5	1842			Solvent			2:H,12	2021-07-20	0.52103		NO	0
14	20210719_MAGL2_TE_RO7527449_Brain_2_014	Sample 1	303.14 > 259.16	4.49	42973	173881	0.247	Analyte			2:B,1	2021-07-20	0.526366		NO	113.781
15	20210719_MAGL2_TE_RO7527449_Brain_2_015	Sample 2	303.14 > 259.16	4.5	43442	168246	0.258	Analyte		4.8	2:B,2	2021-07-20	0.531701		NO	118.848
16	20210719_MAGL2_TE_RO7527449_Brain_2_016	Sample 3	303.14 > 259.16	4.5	44803	156389	0.286	Analyte		17.8	2:B,3	2021-07-20	0.537025		NO	131.746
17	20210719_MAGL2_TE_RO7527449_Brain_2_017	Sample 4	303.14 > 259.16	4.5	29817	140880	0.212	Analyte			2:B,4	2021-07-20	0.542361		NO	97.658
18	20210719_MAGL2_TE_RO7527449_Brain_2_018	Sample 5	303.14 > 259.16	4.5	50837	166902	0.305	Analyte		26.2	2:B,5	2021-07-20	0.547697		NO	140.499
19	20210719_MAGL2_TE_RO7527449_Brain_2_019	Sample 6	303.14 > 259.16	4.5	30917	180137	0.172	Analyte			2:B,6	2021-07-20	0.553032		NO	79.232
20	20210719_MAGL2_TE_RO7527449_Brain_2_020	Sample 7	303.14 > 259.16	4.5	7525	146156	0.051	Analyte			2:B,7	2021-07-20	0.558368		NO	23.4932
21	20210719_MAGL2_TE_RO7527449_Brain_2_021	Sample 8	303.14 > 259.16	4.5	8500	154090	0.055	Analyte			2:B,8	2021-07-20	0.563704		NO	25.3358
22	20210719_MAGL2_TE_RO7527449_Brain_2_022	Sample 9	303.14 > 259.16	4.5	9488	147584	0.064	Analyte			2:B,9	2021-07-20	0.569039		NO	29.4817
23	20210719_MAGL2_TE_RO7527449_Brain_2_023	Sample 10	303.14 > 259.16	4.5	11309	183332	0.062	Analyte			2:B,10	2021-07-20	0.574387		NO	28.5604
24	20210719_MAGL2_TE_RO7527449_Brain_2_024	Sample 11	303.14 > 259.16	4.5	10155	170187	0.06	Analyte			2:B,11	2021-07-20	0.579711		NO	27.6391
25	20210719_MAGL2_TE_RO7527449_Brain_2_025	Sample 12	303.14 > 259.16	4.5	10138	190618	0.053	Analyte			2:B,12	2021-07-20	0.585058		NO	24.4145
26	20210719_MAGL2_TE_RO7527449_Brain_2_026	Sample 13	303.14 > 259.16	4.5	38056	181599	0.21	Analyte			2:C,1	2021-07-20	0.590394		NO	96.7367
27	20210719_MAGL2_TE_RO7527449_Brain_2_027	Sample 14	303.14 > 259.16	4.5	40624	166563	0.244	Analyte			2:C,2	2021-07-20	0.595729		NO	112.399
28	20210719_MAGL2_TE_RO7527449_Brain_2_028	Sample 15	303.14 > 259.16	4.5	37823	147323	0.257	Analyte		4.1	2:C,3	2021-07-20	0.601065		NO	118.387
29	20210719_MAGL2_TE_RO7527449_Brain_2_029	Sample 16	303.14 > 259.16	4.5	35411	171074	0.207	Analyte			2:C,4	2021-07-20	0.6064		NO	95.3548
30	20210719_MAGL2_TE_RO7527449_Brain_2_030	Sample 17	303.14 > 259.16	4.5	26255	131109	0.2	Analyte			2:C,5	2021-07-20	0.611736		NO	92.1302
31	20210719_MAGL2_TE_RO7527449_Brain_2_031	Sample 18	303.14 > 259.16	4.5	33769	150703	0.224	Analyte			2:C,6	2021-07-20	0.617072		NO	103.186
32	20210719_MAGL2_TE_RO7527449_Brain_2_032	Solvent (MeOH) dbl blank	303.14 > 259.16					Solvent			2:H,12	2021-07-20	0.622407		NO	0
33	20210719_MAGL2_TE_RO7527449_Brain_2_033	Solvent (MeOH) dbl blank	303.14 > 259.16					Solvent			2:H,12	2021-07-20	0.627755		NO	0
Anandamide
slope	0.0272752
	Name	Sample Text	Quan Trace	RT	Area	IS Area	Response	Type	Std. Conc	nM	Vial	Acq.Date	Acq.Time	%Dev	Conc. Dev. Flagged	AEA (nM)
1	20210719_MAGL2_TE_7527449_Brain_1_001	Solvent (MeOH) dbl blank	348.18 > 287.16					Solvent			1:H,12	2021-07-20	0.809375		NO	0
2	20210719_MAGL2_TE_7527449_Brain_1_002	Blank	348.18 > 287.16	3.69	1949	155164	0.013	Standard	0		1:A,1	2021-07-20	0.814769		NO	0.476623
3	20210719_MAGL2_TE_7527449_Brain_1_003	Standard 9	348.18 > 287.16	3.69	24060	149901	0.161	Standard	3.9	3.8	1:A,2	2021-07-20	0.820104	-2.6	NO	5.9028
4	20210719_MAGL2_TE_7527449_Brain_1_004	Standard 8	348.18 > 287.16	3.69	10785	35792	0.301	Standard	7.8	9	1:A,3	2021-07-20	0.825451	14.9	NO	11.0357
5	20210719_MAGL2_TE_7527449_Brain_1_005	Standard 7	348.18 > 287.16	3.69	9308	17177	0.542	Standard	15.6	17.8	1:A,4	2021-07-20	0.830799	14	NO	19.8715
6	20210719_MAGL2_TE_7527449_Brain_1_006	Standard 6	348.18 > 287.16	3.69	19498	19381	1.006	Standard	31.3	34.8	1:A,5	2021-07-20	0.836123	11.2	NO	36.8833
7	20210719_MAGL2_TE_7527449_Brain_1_007	Standard 5	348.18 > 287.16	3.69	36833	19641	1.875	Standard	62.5	66.7	1:A,6	2021-07-20	0.84147	6.7	NO	68.7438
8	20210719_MAGL2_TE_7527449_Brain_1_008	Standard 4	348.18 > 287.16	3.69	78921	23067	3.421	Standard	125	123.4	1:A,7	2021-07-20	0.846806	-1.3	NO	125.425
9	20210719_MAGL2_TE_7527449_Brain_1_009	Standard 3	348.18 > 287.16	3.7	191073	27352	6.986	Standard	250	254	1:A,8	2021-07-20	0.852141	1.6	NO	256.13
10	20210719_MAGL2_TE_7527449_Brain_1_010	Standard 2	348.18 > 287.16	3.69	342509	25691	13.332	Standard	500	486.7	1:A,9	2021-07-20	0.857477	-2.7	NO	488.796
11	20210719_MAGL2_TE_7527449_Brain_1_011	Standard 1	348.18 > 287.16	3.69	734143	31103	23.604	Standard	1000	863.3	1:A,10	2021-07-20	0.862812	-13.7	NO	865.402
12	20210719_MAGL2_TE_7527449_Brain_1_012	Solvent (MeOH) dbl blank	348.18 > 287.16	3.68	128			Solvent			1:H,12	2021-07-20	0.86816		NO	0
13	20210719_MAGL2_TE_7527449_Brain_1_013	Solvent (MeOH) dbl blank	348.18 > 287.16					Solvent			1:H,12	2021-07-20	0.873495		NO	0
14	20210719_MAGL2_TE_7527449_Brain_1_014	Sample 1	348.18 > 287.16	3.69	568	51684	0.011	Analyte			1:B,1	2021-07-20	0.878831		NO	0.403297
15	20210719_MAGL2_TE_7527449_Brain_1_015	Sample 2	348.18 > 287.16	3.69	831	76347	0.011	Analyte			1:B,2	2021-07-20	0.884167		NO	0.403297
16	20210719_MAGL2_TE_7527449_Brain_1_016	Sample 3	348.18 > 287.16	3.69	572	45675	0.013	Analyte			1:B,3	2021-07-20	0.889502		NO	0.476623
17	20210719_MAGL2_TE_7527449_Brain_1_017	Sample 4	348.18 > 287.16	3.69	248	24548	0.01	Analyte			1:B,4	2021-07-20	0.894838		NO	0.366633
18	20210719_MAGL2_TE_7527449_Brain_1_018	Sample 5	348.18 > 287.16	3.69	330	30949	0.011	Analyte			1:B,5	2021-07-20	0.900174		NO	0.403297
19	20210719_MAGL2_TE_7527449_Brain_1_019	Sample 6	348.18 > 287.16	3.69	270	29630	0.009	Analyte			1:B,6	2021-07-20	0.905509		NO	0.32997
20	20210719_MAGL2_TE_7527449_Brain_1_020	Sample 7	348.18 > 287.16	3.69	306	32590	0.009	Analyte			1:B,7	2021-07-20	0.910856		NO	0.32997
21	20210719_MAGL2_TE_7527449_Brain_1_021	Sample 8	348.18 > 287.16	3.69	285	35906	0.008	Analyte			1:B,8	2021-07-20	0.916192		NO	0.293307
22	20210719_MAGL2_TE_7527449_Brain_1_022	Sample 9	348.18 > 287.16	3.69	415	29133	0.014	Analyte			1:B,9	2021-07-20	0.921528		NO	0.513287
23	20210719_MAGL2_TE_7527449_Brain_1_023	Sample 10	348.18 > 287.16	3.69	422	39885	0.011	Analyte			1:B,10	2021-07-20	0.926863		NO	0.403297
24	20210719_MAGL2_TE_7527449_Brain_1_024	Sample 11	348.18 > 287.16	3.69	320	37197	0.009	Analyte			1:B,11	2021-07-20	0.932199		NO	0.32997
25	20210719_MAGL2_TE_7527449_Brain_1_025	Sample 12	348.18 > 287.16	3.69	327	35086	0.009	Analyte			1:B,12	2021-07-20	0.937535		NO	0.32997
26	20210719_MAGL2_TE_7527449_Brain_1_026	Sample 13	348.18 > 287.16	3.69	412	37042	0.011	Analyte			1:C,1	2021-07-20	0.942859		NO	0.403297
27	20210719_MAGL2_TE_7527449_Brain_1_027	Sample 14	348.18 > 287.16	3.69	281	34835	0.008	Analyte			1:C,2	2021-07-20	0.948206		NO	0.293307
28	20210719_MAGL2_TE_7527449_Brain_1_028	Sample 15	348.18 > 287.16	3.69	407	37589	0.011	Analyte			1:C,3	2021-07-20	0.953542		NO	0.403297
29	20210719_MAGL2_TE_7527449_Brain_1_029	Sample 16	348.18 > 287.16	3.69	304	38691	0.008	Analyte			1:C,4	2021-07-20	0.958877		NO	0.293307
30	20210719_MAGL2_TE_7527449_Brain_1_030	Sample 17	348.18 > 287.16	3.69	271	36601	0.007	Analyte			1:C,5	2021-07-20	0.964213		NO	0.256643
31	20210719_MAGL2_TE_7527449_Brain_1_031	Sample 18	348.18 > 287.16	3.7	189	38473	0.005	Analyte			1:C,6	2021-07-20	0.969537		NO	0.183317
32	20210719_MAGL2_TE_7527449_Brain_1_032	Solvent (MeOH) dbl blank	348.18 > 287.16					Solvent			1:H,12	2021-07-20	0.974884		NO	0
33	20210719_MAGL2_TE_7527449_Brain_1_033	Solvent (MeOH) dbl blank	348.18 > 287.16					Solvent			1:H,12	2021-07-20	0.98022		NO	0
Colon samples
100mg tissue/ml MeOH		nM = pmol/ml	2-AG, AA 1/100 diluted
2-Arachidonyl-glycerol
slope	0.0020018
	Name	Sample Text	Quan Trace	RT	Area	IS Area	Response	Type	Std. Conc	nM	Vial	Acq.Date	Acq.Time	%Dev	Conc. Dev. Flagged	2-AG (nM)
1	20210719_MAGL2_TE_RO7527449_Colon_2_001	Solvent (MeOH) dbl blank	379.24 > 287.21					Solvent			2:H,12	2021-07-20	0.633125		NO	0
2	20210719_MAGL2_TE_RO7527449_Colon_2_002	Blank	379.24 > 287.21	3.98	14535	687042	0.021	Standard	0		2:D,1	2021-07-20	0.638507		NO	10.4906
3	20210719_MAGL2_TE_RO7527449_Colon_2_003	Standard 9	379.24 > 287.21	3.97	77122	624766	0.123	Standard	39	40.3	2:D,2	2021-07-20	0.643843	3.4	NO	61.4447
4	20210719_MAGL2_TE_RO7527449_Colon_2_004	Standard 8	379.24 > 287.21	3.97	146213	725153	0.202	Standard	78	79.4	2:D,3	2021-07-20	0.64919	1.8	NO	100.909
5	20210719_MAGL2_TE_RO7527449_Colon_2_005	Standard 7	379.24 > 287.21	3.97	218173	554247	0.394	Standard	156	175.3	2:D,4	2021-07-20	0.654537	12.4	NO	196.823
6	20210719_MAGL2_TE_RO7527449_Colon_2_006	Standard 6	379.24 > 287.21	3.97	448346	646238	0.694	Standard	312	325.2	2:D,5	2021-07-20	0.659873	4.2	NO	346.688
7	20210719_MAGL2_TE_RO7527449_Colon_2_007	Standard 5	379.24 > 287.21	3.97	945434	696786	1.357	Standard	625	656.5	2:D,6	2021-07-20	0.66522	5	NO	677.89
8	20210719_MAGL2_TE_RO7527449_Colon_2_008	Standard 4	379.24 > 287.21	3.97	1656523	609435	2.718	Standard	1250	1336.5	2:D,7	2021-07-20	0.670556	6.9	NO	1357.78
9	20210719_MAGL2_TE_RO7527449_Colon_2_009	Standard 3	379.24 > 287.21	3.97	3001255	633114	4.74	Standard	2500	2346.8	2:D,8	2021-07-20	0.67588	-6.1	NO	2367.87
10	20210719_MAGL2_TE_RO7527449_Colon_2_010	Standard 2	379.24 > 287.21	3.97	4492020	514244	8.735	Standard	5000	4342.3	2:D,9	2021-07-20	0.681227	-13.2	NO	4363.57
11	20210719_MAGL2_TE_RO7527449_Colon_2_011	Standard 1	379.24 > 287.21	3.98	6025777	372322	16.184	Standard	10000	8063.6	2:D,10	2021-07-20	0.686562	-19.4	YES	8084.72
12	20210719_MAGL2_TE_RO7527449_Colon_2_012	Solvent (MeOH) dbl blank	379.24 > 287.21	3.97	1966			Solvent			2:H,12	2021-07-20	0.691898		NO	0
13	20210719_MAGL2_TE_RO7527449_Colon_2_013	Solvent (MeOH) dbl blank	379.24 > 287.21					Solvent			2:H,12	2021-07-20	0.697245		NO	0
14	20210719_MAGL2_TE_RO7527449_Colon_2_014	Sample 1	379.24 > 287.21	3.97	9083	917153	0.01	Analyte			2:E,1	2021-07-20	0.702581		NO	4.9955
15	20210719_MAGL2_TE_RO7527449_Colon_2_015	Sample 2	379.24 > 287.21	3.97	6753	658594	0.01	Analyte			2:E,2	2021-07-20	0.707917		NO	4.9955
16	20210719_MAGL2_TE_RO7527449_Colon_2_016	Sample 3	379.24 > 287.21	3.97	6253	614402	0.01	Analyte			2:E,3	2021-07-20	0.713264		NO	4.9955
17	20210719_MAGL2_TE_RO7527449_Colon_2_017	Sample 4	379.24 > 287.21	3.97	7377	832586	0.009	Analyte			2:E,4	2021-07-20	0.7186		NO	4.49595
18	20210719_MAGL2_TE_RO7527449_Colon_2_018	Sample 5	379.24 > 287.21	3.97	9262	896514	0.01	Analyte			2:E,5	2021-07-20	0.723947		NO	4.9955
19	20210719_MAGL2_TE_RO7527449_Colon_2_019	Sample 6	379.24 > 287.21	3.97	7592	826651	0.009	Analyte			2:E,6	2021-07-20	0.729282		NO	4.49595
20	20210719_MAGL2_TE_RO7527449_Colon_2_020	Sample 7	379.24 > 287.21	3.97	18519	780385	0.024	Analyte			2:E,7	2021-07-20	0.734618		NO	11.9892
21	20210719_MAGL2_TE_RO7527449_Colon_2_021	Sample 8	379.24 > 287.21	3.97	21624	845544	0.026	Analyte			2:E,8	2021-07-20	0.739965		NO	12.9883
22	20210719_MAGL2_TE_RO7527449_Colon_2_022	Sample 9	379.24 > 287.21	3.97	24939	772318	0.032	Analyte			2:E,9	2021-07-20	0.745312		NO	15.9856
23	20210719_MAGL2_TE_RO7527449_Colon_2_023	Sample 10	379.24 > 287.21	3.97	19003	730920	0.026	Analyte			2:E,10	2021-07-20	0.750648		NO	12.9883
24	20210719_MAGL2_TE_RO7527449_Colon_2_024	Sample 11	379.24 > 287.21	3.97	16888	706499	0.024	Analyte			2:E,11	2021-07-20	0.755984		NO	11.9892
25	20210719_MAGL2_TE_RO7527449_Colon_2_025	Sample 12	379.24 > 287.21	3.97	16385	663308	0.025	Analyte			2:E,12	2021-07-20	0.761308		NO	12.4888
26	20210719_MAGL2_TE_RO7527449_Colon_2_026	Sample 13	379.24 > 287.21	3.97	9961	579404	0.017	Analyte			2:F,1	2021-07-20	0.766655		NO	8.49236
27	20210719_MAGL2_TE_RO7527449_Colon_2_027	Sample 14	379.24 > 287.21	3.97	14211	765395	0.019	Analyte			2:F,2	2021-07-20	0.772002		NO	9.49146
28	20210719_MAGL2_TE_RO7527449_Colon_2_028	Sample 15	379.24 > 287.21	3.97	5935	674787	0.009	Analyte			2:F,3	2021-07-20	0.777326		NO	4.49595
29	20210719_MAGL2_TE_RO7527449_Colon_2_029	Sample 16	379.24 > 287.21	3.97	9526	826304	0.012	Analyte			2:F,4	2021-07-20	0.78265		NO	5.9946
30	20210719_MAGL2_TE_RO7527449_Colon_2_030	Sample 17	379.24 > 287.21	3.97	7981	796726	0.01	Analyte			2:F,5	2021-07-20	0.787998		NO	4.9955
31	20210719_MAGL2_TE_RO7527449_Colon_2_031	Sample 18	379.24 > 287.21	3.97	19188	869240	0.022	Analyte			2:F,6	2021-07-20	0.793322		NO	10.9901
32	20210719_MAGL2_TE_RO7527449_Colon_2_032	Solvent (MeOH) dbl blank	379.24 > 287.21					Solvent			2:H,12	2021-07-20	0.798669		NO	0
33	20210719_MAGL2_TE_RO7527449_Colon_2_033	Solvent (MeOH) dbl blank	379.24 > 287.21					Solvent			2:H,12	2021-07-20	0.803993		NO	0
Arachidonic acid
slope	0.0018212
	Name	Sample Text	Quan Trace	RT	Area	IS Area	Response	Type	Std. Conc	nM	Vial	Acq.Date	Acq.Time	%Dev	Conc. Dev. Flagged	AA (nM)
1	20210719_MAGL2_TE_RO7527449_Colon_2_001	Solvent (MeOH) dbl blank	303.14 > 259.16					Solvent			2:H,12	2021-07-20	0.633125		NO	0
2	20210719_MAGL2_TE_RO7527449_Colon_2_002	Blank	303.14 > 259.16	4.5	13132	173787	0.076	Standard	0		2:D,1	2021-07-20	0.638507		NO	41.7307
3	20210719_MAGL2_TE_RO7527449_Colon_2_003	Standard 9	303.14 > 259.16	4.5	40649	148576	0.274	Standard	78	82	2:D,2	2021-07-20	0.643843	5.2	NO	150.45
4	20210719_MAGL2_TE_RO7527449_Colon_2_004	Standard 8	303.14 > 259.16	4.5	71307	170641	0.418	Standard	156	161.3	2:D,3	2021-07-20	0.64919	3.4	NO	229.519
5	20210719_MAGL2_TE_RO7527449_Colon_2_005	Standard 7	303.14 > 259.16	4.5	105326	128332	0.821	Standard	312	382.5	2:D,4	2021-07-20	0.654537	22.6	YES	450.802
6	20210719_MAGL2_TE_RO7527449_Colon_2_006	Standard 6	303.14 > 259.16	4.5	205206	151641	1.353	Standard	625	674.8	2:D,5	2021-07-20	0.659873	8	NO	742.917
7	20210719_MAGL2_TE_RO7527449_Colon_2_007	Standard 5	303.14 > 259.16	4.5	386748	160069	2.416	Standard	1250	1258.5	2:D,6	2021-07-20	0.66522	0.7	NO	1326.6
8	20210719_MAGL2_TE_RO7527449_Colon_2_008	Standard 4	303.14 > 259.16	4.5	601030	135802	4.426	Standard	2500	2361.9	2:D,7	2021-07-20	0.670556	-5.5	NO	2430.27
9	20210719_MAGL2_TE_RO7527449_Colon_2_009	Standard 3	303.14 > 259.16	4.49	915877	136551	6.707	Standard	5000	3614.6	2:D,8	2021-07-20	0.67588	-27.7	YES	3682.74
10	20210719_MAGL2_TE_RO7527449_Colon_2_010	Standard 2	303.14 > 259.16	4.49	1230747	114706	10.73	Standard	10000	5823.3	2:D,9	2021-07-20	0.681227	-41.8	YES	5891.72
11	20210719_MAGL2_TE_RO7527449_Colon_2_011	Standard 1	303.14 > 259.16	4.5	1569335	83378	18.822	Standard	20000	10266.7	2:D,10	2021-07-20	0.686562	-48.7	YES	10334.9
12	20210719_MAGL2_TE_RO7527449_Colon_2_012	Solvent (MeOH) dbl blank	303.14 > 259.16	4.49	3984			Solvent			2:H,12	2021-07-20	0.691898		NO	0
13	20210719_MAGL2_TE_RO7527449_Colon_2_013	Solvent (MeOH) dbl blank	303.14 > 259.16	4.49	1500			Solvent			2:H,12	2021-07-20	0.697245		NO	0
14	20210719_MAGL2_TE_RO7527449_Colon_2_014	Sample 1	303.14 > 259.16	4.49	11094	223522	0.05	Analyte			2:E,1	2021-07-20	0.702581		NO	27.4544
15	20210719_MAGL2_TE_RO7527449_Colon_2_015	Sample 2	303.14 > 259.16	4.5	14095	166747	0.085	Analyte			2:E,2	2021-07-20	0.707917		NO	46.6725
16	20210719_MAGL2_TE_RO7527449_Colon_2_016	Sample 3	303.14 > 259.16	4.5	11031	168067	0.066	Analyte			2:E,3	2021-07-20	0.713264		NO	36.2398
17	20210719_MAGL2_TE_RO7527449_Colon_2_017	Sample 4	303.14 > 259.16	4.5	9256	203124	0.046	Analyte			2:E,4	2021-07-20	0.7186		NO	25.2581
18	20210719_MAGL2_TE_RO7527449_Colon_2_018	Sample 5	303.14 > 259.16	4.5	12408	218386	0.057	Analyte			2:E,5	2021-07-20	0.723947		NO	31.298
19	20210719_MAGL2_TE_RO7527449_Colon_2_019	Sample 6	303.14 > 259.16	4.49	12377	203008	0.061	Analyte			2:E,6	2021-07-20	0.729282		NO	33.4944
20	20210719_MAGL2_TE_RO7527449_Colon_2_020	Sample 7	303.14 > 259.16	4.49	8876	194413	0.046	Analyte			2:E,7	2021-07-20	0.734618		NO	25.2581
21	20210719_MAGL2_TE_RO7527449_Colon_2_021	Sample 8	303.14 > 259.16	4.49	12745	212086	0.06	Analyte			2:E,8	2021-07-20	0.739965		NO	32.9453
22	20210719_MAGL2_TE_RO7527449_Colon_2_022	Sample 9	303.14 > 259.16	4.49	12655	195798	0.065	Analyte			2:E,9	2021-07-20	0.745312		NO	35.6908
23	20210719_MAGL2_TE_RO7527449_Colon_2_023	Sample 10	303.14 > 259.16	4.5	13160	182435	0.072	Analyte			2:E,10	2021-07-20	0.750648		NO	39.5344
24	20210719_MAGL2_TE_RO7527449_Colon_2_024	Sample 11	303.14 > 259.16	4.5	7565	168366	0.045	Analyte			2:E,11	2021-07-20	0.755984		NO	24.709
25	20210719_MAGL2_TE_RO7527449_Colon_2_025	Sample 12	303.14 > 259.16	4.49	9163	166898	0.055	Analyte			2:E,12	2021-07-20	0.761308		NO	30.1999
26	20210719_MAGL2_TE_RO7527449_Colon_2_026	Sample 13	303.14 > 259.16	4.49	8166	147486	0.055	Analyte			2:F,1	2021-07-20	0.766655		NO	30.1999
27	20210719_MAGL2_TE_RO7527449_Colon_2_027	Sample 14	303.14 > 259.16	4.5	13262	191967	0.069	Analyte			2:F,2	2021-07-20	0.772002		NO	37.8871
28	20210719_MAGL2_TE_RO7527449_Colon_2_028	Sample 15	303.14 > 259.16	4.5	8040	175132	0.046	Analyte			2:F,3	2021-07-20	0.777326		NO	25.2581
29	20210719_MAGL2_TE_RO7527449_Colon_2_029	Sample 16	303.14 > 259.16	4.49	14161	206715	0.069	Analyte			2:F,4	2021-07-20	0.78265		NO	37.8871
30	20210719_MAGL2_TE_RO7527449_Colon_2_030	Sample 17	303.14 > 259.16	4.5	9761	197168	0.05	Analyte			2:F,5	2021-07-20	0.787998		NO	27.4544
31	20210719_MAGL2_TE_RO7527449_Colon_2_031	Sample 18	303.14 > 259.16	4.5	16765	218993	0.077	Analyte			2:F,6	2021-07-20	0.793322		NO	42.2798
32	20210719_MAGL2_TE_RO7527449_Colon_2_032	Solvent (MeOH) dbl blank	303.14 > 259.16					Solvent			2:H,12	2021-07-20	0.798669		NO	0
33	20210719_MAGL2_TE_RO7527449_Colon_2_033	Solvent (MeOH) dbl blank	303.14 > 259.16					Solvent			2:H,12	2021-07-20	0.803993		NO	0
Anandamide
slope	0.028426
	Name	Sample Text	Quan Trace	RT	Area	IS Area	Response	Type	Std. Conc	nM	Vial	Acq.Date	Acq.Time	%Dev	Conc. Dev. Flagged	AEA (nM)
1	20210719_MAGL2_TE_7527449_Colon_1_001	Solvent (MeOH) dbl blank	348.18 > 287.16					Solvent			1:H,12	2021-07-20	0.985602		NO	0
2	20210719_MAGL2_TE_7527449_Colon_1_002	Blank	348.18 > 287.16	3.69	754	63943	0.012	Standard	0		1:D,1	2021-07-20	0.990984		NO	0.422149
3	20210719_MAGL2_TE_7527449_Colon_1_003	Standard 9	348.18 > 287.16	3.69	12830	77886	0.165	Standard	3.9	3.9	1:D,2	2021-07-20	0.996319	-0.4	NO	5.80455
4	20210719_MAGL2_TE_7527449_Colon_1_004	Standard 8	348.18 > 287.16	3.69	14377	50309	0.286	Standard	7.8	8.1	1:D,3	2021-07-21	0.00165509	4.4	NO	10.0612
5	20210719_MAGL2_TE_7527449_Colon_1_005	Standard 7	348.18 > 287.16	3.69	22064	39705	0.556	Standard	15.6	17.6	1:D,4	2021-07-21	0.00699074	13.1	NO	19.5596
6	20210719_MAGL2_TE_7527449_Colon_1_006	Standard 6	348.18 > 287.16	3.69	44131	44076	1.001	Standard	31.3	33.3	1:D,5	2021-07-21	0.0123264	6.4	NO	35.2142
7	20210719_MAGL2_TE_7527449_Colon_1_007	Standard 5	348.18 > 287.16	3.69	90498	46143	1.961	Standard	62.5	67.1	1:D,6	2021-07-21	0.0176736	7.3	NO	68.9861
8	20210719_MAGL2_TE_7527449_Colon_1_008	Standard 4	348.18 > 287.16	3.69	147143	36032	4.084	Standard	125	141.7	1:D,7	2021-07-21	0.0230093	13.4	NO	143.671
9	20210719_MAGL2_TE_7527449_Colon_1_009	Standard 3	348.18 > 287.16	3.69	273040	38595	7.075	Standard	250	247	1:D,8	2021-07-21	0.0283565	-1.2	NO	248.892
10	20210719_MAGL2_TE_7527449_Colon_1_010	Standard 2	348.18 > 287.16	3.69	535693	39322	13.623	Standard	500	477.3	1:D,9	2021-07-21	0.0336921	-4.5	NO	479.244
11	20210719_MAGL2_TE_7527449_Colon_1_011	Standard 1	348.18 > 287.16	3.69	997640	39278	25.399	Standard	1000	891.6	1:D,10	2021-07-21	0.0390394	-10.8	NO	893.513
12	20210719_MAGL2_TE_7527449_Colon_1_012	Solvent (MeOH) dbl blank	348.18 > 287.16	3.69	107			Solvent			1:H,12	2021-07-21	0.0443634		NO	0
13	20210719_MAGL2_TE_7527449_Colon_1_013	Solvent (MeOH) dbl blank	348.18 > 287.16					Solvent			1:H,12	2021-07-21	0.0496991		NO	0
14	20210719_MAGL2_TE_7527449_Colon_1_014	Sample 1	348.18 > 287.16	3.69	844	80549	0.01	Analyte			1:E,1	2021-07-21	0.0550347		NO	0.351791
15	20210719_MAGL2_TE_7527449_Colon_1_015	Sample 2	348.18 > 287.16	3.69	2417	101014	0.024	Analyte			1:E,2	2021-07-21	0.0603704		NO	0.844297
16	20210719_MAGL2_TE_7527449_Colon_1_016	Sample 3	348.18 > 287.16	3.69	958	67588	0.014	Analyte			1:E,3	2021-07-21	0.065706		NO	0.492507
17	20210719_MAGL2_TE_7527449_Colon_1_017	Sample 4	348.18 > 287.16	3.7	595	56319	0.011	Analyte			1:E,4	2021-07-21	0.0710532		NO	0.38697
18	20210719_MAGL2_TE_7527449_Colon_1_018	Sample 5	348.18 > 287.16	3.69	667	39133	0.017	Analyte			1:E,5	2021-07-21	0.0763889		NO	0.598044
19	20210719_MAGL2_TE_7527449_Colon_1_019	Sample 6	348.18 > 287.16	3.69	575	44971	0.013	Analyte			1:E,6	2021-07-21	0.0817245		NO	0.457328
20	20210719_MAGL2_TE_7527449_Colon_1_020	Sample 7	348.18 > 287.16	3.69	1107	53409	0.021	Analyte			1:E,7	2021-07-21	0.0870602		NO	0.73876
21	20210719_MAGL2_TE_7527449_Colon_1_021	Sample 8	348.18 > 287.16	3.69	416	45722	0.009	Analyte			1:E,8	2021-07-21	0.0923958		NO	0.316612
22	20210719_MAGL2_TE_7527449_Colon_1_022	Sample 9	348.18 > 287.16	3.69	222	47412	0.005	Analyte			1:E,9	2021-07-21	0.0977315		NO	0.175895
23	20210719_MAGL2_TE_7527449_Colon_1_023	Sample 10	348.18 > 287.16	3.69	350	53352	0.007	Analyte			1:E,10	2021-07-21	0.103067		NO	0.246253
24	20210719_MAGL2_TE_7527449_Colon_1_024	Sample 11	348.18 > 287.16	3.69	387	47771	0.008	Analyte			1:E,11	2021-07-21	0.108403		NO	0.281432
25	20210719_MAGL2_TE_7527449_Colon_1_025	Sample 12	348.18 > 287.16	3.69	332	48690	0.007	Analyte			1:E,12	2021-07-21	0.113738		NO	0.246253
26	20210719_MAGL2_TE_7527449_Colon_1_026	Sample 13	348.18 > 287.16	3.69	229	45554	0.005	Analyte			1:F,1	2021-07-21	0.119086		NO	0.175895
27	20210719_MAGL2_TE_7527449_Colon_1_027	Sample 14	348.18 > 287.16	3.69	427	52291	0.008	Analyte			1:F,2	2021-07-21	0.124421		NO	0.281432
28	20210719_MAGL2_TE_7527449_Colon_1_028	Sample 15	348.18 > 287.16	3.69	822	49817	0.017	Analyte			1:F,3	2021-07-21	0.129757		NO	0.598044
29	20210719_MAGL2_TE_7527449_Colon_1_029	Sample 16	348.18 > 287.16	3.7	333	49194	0.007	Analyte			1:F,4	2021-07-21	0.135093		NO	0.246253
30	20210719_MAGL2_TE_7527449_Colon_1_030	Sample 17	348.18 > 287.16	3.69	275	47682	0.006	Analyte			1:F,5	2021-07-21	0.140417		NO	0.211074
31	20210719_MAGL2_TE_7527449_Colon_1_031	Sample 18	348.18 > 287.16	3.69	489	43966	0.011	Analyte			1:F,6	2021-07-21	0.145752		NO	0.38697
32	20210719_MAGL2_TE_7527449_Colon_1_043	Solvent (MeOH) dbl blank	348.18 > 287.16					Solvent			1:H,12	2021-07-21	0.151088		NO	0
33	20210719_MAGL2_TE_7527449_Colon_1_044	Solvent (MeOH) dbl blank	348.18 > 287.16					Solvent			1:H,12	2021-07-21	0.156424		NO	0
IN VIVO STUDY 2
Brain samples
100mg tissue/ml MeOH		nM = pmol/ml	2-AG, AA 1/100 diluted
2-Arachidonyl-glycerol
slope	0.00205265
	Name	Sample Text	Quan Trace	Inj. Vol	RT	Area	IS Area	Response	Type	Std. Conc	nM	Primary Flags	%Dev	Conc. Dev. Flagged	Coeff. Of Determination	CD Flag	2-AG (nM)
1	20210921_MAGL2_TE_RO7527449_Brain_2_001	Solvent (MeOH) dbl blank	379.24 > 287.21	2					Solvent					NO	0.998	NO	0
2	20210921_MAGL2_TE_RO7527449_Brain_2_002	Blank	379.24 > 287.21	2	3.93	48546	486264	0.1	Standard	0		bbI		NO	0.998	NO	48.7175
3	20210921_MAGL2_TE_RO7527449_Brain_2_003	Standard 9	379.24 > 287.21	2	3.93	126832	660794	0.192	Standard	39	40.3	bb	3.4	NO	0.998	NO	93.5376
4	20210921_MAGL2_TE_RO7527449_Brain_2_004	Standard 8	379.24 > 287.21	2	3.93	148564	551690	0.269	Standard	78	78	bb	0	NO	0.998	NO	131.05
5	20210921_MAGL2_TE_RO7527449_Brain_2_005	Standard 7	379.24 > 287.21	2	3.93	305044	660336	0.462	Standard	156	171.9	bb	10.2	NO	0.998	NO	225.075
6	20210921_MAGL2_TE_RO7527449_Brain_2_006	Standard 6	379.24 > 287.21	2	3.93	590241	656311	0.899	Standard	312	384.9	bbX	23.4	YES	0.998	NO	437.97
7	20210921_MAGL2_TE_RO7527449_Brain_2_007	Standard 5	379.24 > 287.21	2	3.93	901889	624572	1.444	Standard	625	650.3	bb	4	NO	0.998	NO	703.481
8	20210921_MAGL2_TE_RO7527449_Brain_2_008	Standard 4	379.24 > 287.21	2	3.93	1326319	509326	2.604	Standard	1250	1215.5	bb	-2.8	NO	0.998	NO	1268.6
9	20210921_MAGL2_TE_RO7527449_Brain_2_009	Standard 3	379.24 > 287.21	2	3.93	2163502	491272	4.404	Standard	2500	2092.3	bbX	-16.3	YES	0.998	NO	2145.52
10	20210921_MAGL2_TE_RO7527449_Brain_2_010	Standard 2	379.24 > 287.21	2	3.93	3872648	492288	7.867	Standard	5000	3779.2	bbX	-24.4	YES	0.998	NO	3832.61
11	20210921_MAGL2_TE_RO7527449_Brain_2_011	Standard 1	379.24 > 287.21	2	3.93	5574723	367757	15.159	Standard	10000	7331.8	bbX	-26.7	YES	0.998	NO	7385.09
12	20210921_MAGL2_TE_RO7527449_Brain_2_012	Solvent (MeOH) dbl blank	379.24 > 287.21	2	3.93	2262			Solvent			bb		NO	0.998	NO	0
13	20210921_MAGL2_TE_RO7527449_Brain_2_013	Solvent (MeOH) dbl blank	379.24 > 287.21	2					Solvent					NO	0.998	NO	0
14	20210921_MAGL2_TE_RO7527449_Brain_2_014	Sample 1	379.24 > 287.21	2	3.93	20470	760726	0.027	Analyte			MMI		NO	0.998	NO	13.1537
15	20210921_MAGL2_TE_RO7527449_Brain_2_015	Sample 2	379.24 > 287.21	2	3.93	21862	807356	0.027	Analyte			MMI		NO	0.998	NO	13.1537
16	20210921_MAGL2_TE_RO7527449_Brain_2_016	Sample 3	379.24 > 287.21	2	3.93	16981	852274	0.02	Analyte			MMI		NO	0.998	NO	9.7435
17	20210921_MAGL2_TE_RO7527449_Brain_2_017	Sample 4	379.24 > 287.21	2	3.93	18088	809745	0.022	Analyte			bbI		NO	0.998	NO	10.7179
18	20210921_MAGL2_TE_RO7527449_Brain_2_018	Sample 5	379.24 > 287.21	2	3.93	19306	775690	0.025	Analyte			MMI		NO	0.998	NO	12.1794
19	20210921_MAGL2_TE_RO7527449_Brain_2_019	Sample 6	379.24 > 287.21	2	3.93	16885	752558	0.022	Analyte			MMI		NO	0.998	NO	10.7179
20	20210921_MAGL2_TE_RO7527449_Brain_2_020	Sample 7	379.24 > 287.21	2	3.93	146563	594431	0.247	Analyte		66.9	bb		NO	0.998	NO	120.332
21	20210921_MAGL2_TE_RO7527449_Brain_2_021	Sample 8	379.24 > 287.21	2	3.93	224949	741910	0.303	Analyte		94.5	bb		NO	0.998	NO	147.614
22	20210921_MAGL2_TE_RO7527449_Brain_2_022	Sample 9	379.24 > 287.21	2	3.94	137105	608762	0.225	Analyte		56.5	MM		NO	0.998	NO	109.614
23	20210921_MAGL2_TE_RO7527449_Brain_2_023	Sample 10	379.24 > 287.21	2	3.93	200434	636035	0.315	Analyte		100.3	bb		NO	0.998	NO	153.46
24	20210921_MAGL2_TE_RO7527449_Brain_2_024	Sample 11	379.24 > 287.21	2	3.93	168868	608467	0.278	Analyte		82	bb		NO	0.998	NO	135.435
25	20210921_MAGL2_TE_RO7527449_Brain_2_025	Sample 12	379.24 > 287.21	2	3.93	160477	645973	0.248	Analyte		67.8	bb		NO	0.998	NO	120.819
26	20210921_MAGL2_TE_RO7527449_Brain_2_026	Sample 13	379.24 > 287.21	2	3.93	13664	681570	0.02	Analyte			MMI		NO	0.998	NO	9.7435
27	20210921_MAGL2_TE_RO7527449_Brain_2_027	Sample 14	379.24 > 287.21	2	3.93	19010	739671	0.026	Analyte			MMI		NO	0.998	NO	12.6666
28	20210921_MAGL2_TE_RO7527449_Brain_2_028	Sample 15	379.24 > 287.21	2	3.93	26306	748418	0.035	Analyte			bbI		NO	0.998	NO	17.0511
29	20210921_MAGL2_TE_RO7527449_Brain_2_029	Sample 16	379.24 > 287.21	2	3.93	13758	754281	0.018	Analyte			MMI		NO	0.998	NO	8.76915
30	20210921_MAGL2_TE_RO7527449_Brain_2_030	Sample 17	379.24 > 287.21	2	3.93	15055	648011	0.023	Analyte			MMI		NO	0.998	NO	11.205
31	20210921_MAGL2_TE_RO7527449_Brain_2_031	Sample 18	379.24 > 287.21	2	3.93	15408	758408	0.02	Analyte			MMI		NO	0.998	NO	9.7435
32	20210921_MAGL2_TE_RO7527449_Brain_2_032	Solvent (MeOH) dbl blank	379.24 > 287.21	2					Solvent					NO	0.998	NO	0
33	20210921_MAGL2_TE_RO7527449_Brain_2_033	Solvent (MeOH) dbl blank	379.24 > 287.21	2					Solvent					NO	0.998	NO	0
Arachidonic acid
slope	0.00163985
	Name	Sample Text	Quan Trace	Inj. Vol	RT	Area	IS Area	Response	Type	Std. Conc	nM	Primary Flags	%Dev	Conc. Dev. Flagged	Coeff. Of Determination	CD Flag	AA (nM)
1	20210921_MAGL2_TE_RO7527449_Brain_2_001	Solvent (MeOH) dbl blank	303.14 > 259.16	2					Solvent					NO	0.986	NO	0
2	20210921_MAGL2_TE_RO7527449_Brain_2_002	Blank	303.14 > 259.16	2	4.44	5943	30531	0.195	Standard	0		bbI		NO	0.986	NO	118.913
3	20210921_MAGL2_TE_RO7527449_Brain_2_003	Standard 9	303.14 > 259.16	2	4.45	14927	39167	0.381	Standard	78	79.2	bb	1.6	NO	0.986	NO	232.338
4	20210921_MAGL2_TE_RO7527449_Brain_2_004	Standard 8	303.14 > 259.16	2	4.45	16955	31341	0.541	Standard	156	176.7	bb	13.3	NO	0.986	NO	329.908
5	20210921_MAGL2_TE_RO7527449_Brain_2_005	Standard 7	303.14 > 259.16	2	4.46	29785	34366	0.867	Standard	312	375.3	bb	20.3	YES	0.986	NO	528.707
6	20210921_MAGL2_TE_RO7527449_Brain_2_006	Standard 6	303.14 > 259.16	2	4.46	53358	35369	1.509	Standard	625	766.8	bb	22.7	YES	0.986	NO	920.206
7	20210921_MAGL2_TE_RO7527449_Brain_2_007	Standard 5	303.14 > 259.16	2	4.46	81877	35153	2.329	Standard	1250	1267.2	bb	1.4	NO	0.986	NO	1420.25
8	20210921_MAGL2_TE_RO7527449_Brain_2_008	Standard 4	303.14 > 259.16	2	4.46	116190	28404	4.091	Standard	2500	2341.3	bb	-6.3	NO	0.986	NO	2494.74
9	20210921_MAGL2_TE_RO7527449_Brain_2_009	Standard 3	303.14 > 259.16	2	4.46	190185	27453	6.928	Standard	5000	4071.3	bbX	-18.6	YES	0.986	NO	4224.78
10	20210921_MAGL2_TE_RO7527449_Brain_2_010	Standard 2	303.14 > 259.16	2	4.46	322247	26269	12.267	Standard	10000	7327.6	bbX	-26.7	YES	0.986	NO	7480.56
11	20210921_MAGL2_TE_RO7527449_Brain_2_011	Standard 1	303.14 > 259.16	2	4.46	437409	20186	21.669	Standard	20000	13061	bbX	-34.7	YES	0.986	NO	13214
12	20210921_MAGL2_TE_RO7527449_Brain_2_012	Solvent (MeOH) dbl blank	303.14 > 259.16	2					Solvent					NO	0.986	NO	0
13	20210921_MAGL2_TE_RO7527449_Brain_2_013	Solvent (MeOH) dbl blank	303.14 > 259.16	2					Solvent					NO	0.986	NO	0
14	20210921_MAGL2_TE_RO7527449_Brain_2_014	Sample 1	303.14 > 259.16	2	4.46	10613	37904	0.28	Analyte		17.6	bb		NO	0.986	NO	170.747
15	20210921_MAGL2_TE_RO7527449_Brain_2_015	Sample 2	303.14 > 259.16	2	4.46	13779	41900	0.329	Analyte		47.4	bb		NO	0.986	NO	200.628
16	20210921_MAGL2_TE_RO7527449_Brain_2_016	Sample 3	303.14 > 259.16	2	4.46	11620	43122	0.269	Analyte		11.2	bb		NO	0.986	NO	164.039
17	20210921_MAGL2_TE_RO7527449_Brain_2_017	Sample 4	303.14 > 259.16	2	4.46	10121	38365	0.264	Analyte		7.7	bb		NO	0.986	NO	160.99
18	20210921_MAGL2_TE_RO7527449_Brain_2_018	Sample 5	303.14 > 259.16	2	4.46	7255	37021	0.196	Analyte			bbI		NO	0.986	NO	119.523
19	20210921_MAGL2_TE_RO7527449_Brain_2_019	Sample 6	303.14 > 259.16	2	4.46	11002	35745	0.308	Analyte		34.5	bb		NO	0.986	NO	187.822
20	20210921_MAGL2_TE_RO7527449_Brain_2_020	Sample 7	303.14 > 259.16	2	4.46	1342	28757	0.047	Analyte			bbI		NO	0.986	NO	28.6612
21	20210921_MAGL2_TE_RO7527449_Brain_2_021	Sample 8	303.14 > 259.16	2	4.46	2673	37857	0.071	Analyte			bbI		NO	0.986	NO	43.2966
22	20210921_MAGL2_TE_RO7527449_Brain_2_022	Sample 9	303.14 > 259.16	2	4.46	1062	29633	0.036	Analyte			bbI		NO	0.986	NO	21.9532
23	20210921_MAGL2_TE_RO7527449_Brain_2_023	Sample 10	303.14 > 259.16	2	4.46	1905	32050	0.059	Analyte			bbI		NO	0.986	NO	35.9789
24	20210921_MAGL2_TE_RO7527449_Brain_2_024	Sample 11	303.14 > 259.16	2	4.46	2558	29822	0.086	Analyte			bbI		NO	0.986	NO	52.4438
25	20210921_MAGL2_TE_RO7527449_Brain_2_025	Sample 12	303.14 > 259.16	2	4.46	1491	32071	0.047	Analyte			bbI		NO	0.986	NO	28.6612
26	20210921_MAGL2_TE_RO7527449_Brain_2_026	Sample 13	303.14 > 259.16	2	4.46	7213	32208	0.224	Analyte			bbI		NO	0.986	NO	136.598
27	20210921_MAGL2_TE_RO7527449_Brain_2_027	Sample 14	303.14 > 259.16	2	4.46	8251	35888	0.23	Analyte			bbI		NO	0.986	NO	140.257
28	20210921_MAGL2_TE_RO7527449_Brain_2_028	Sample 15	303.14 > 259.16	2	4.46	6728	36066	0.187	Analyte			bbI		NO	0.986	NO	114.035
29	20210921_MAGL2_TE_RO7527449_Brain_2_029	Sample 16	303.14 > 259.16	2	4.46	9618	35002	0.275	Analyte		14.4	bb		NO	0.986	NO	167.698
30	20210921_MAGL2_TE_RO7527449_Brain_2_030	Sample 17	303.14 > 259.16	2	4.46	6194	30076	0.206	Analyte			bbI		NO	0.986	NO	125.621
31	20210921_MAGL2_TE_RO7527449_Brain_2_031	Sample 18	303.14 > 259.16	2	4.46	9985	35608	0.28	Analyte		17.8	bb		NO	0.986	NO	170.747
32	20210921_MAGL2_TE_RO7527449_Brain_2_032	Solvent (MeOH) dbl blank	303.14 > 259.16	2					Solvent					NO	0.986	NO	0
33	20210921_MAGL2_TE_RO7527449_Brain_2_033	Solvent (MeOH) dbl blank	303.14 > 259.16	2					Solvent					NO	0.986	NO	0
Anandamide
slope	0.0298524
	Name	Sample Text	Quan Trace	Inj. Vol	RT	Area	IS Area	Response	Type	Std. Conc	nM	Primary Flags	%Dev	Conc. Dev. Flagged	Coeff. Of Determination	CD Flag	AEA (nM)
1	20210921_MAGL2_TE_RO7527449_Brain_1_001	Solvent (MeOH) dbl blank	348.18 > 287.16	2					Solvent					NO	0.998	NO	0
2	20210921_MAGL2_TE_RO7527449_Brain_1_002	Blank	348.18 > 287.16	2	3.65	2016	215907	0.009	Standard	0		bbI		NO	0.998	NO	0.301483
3	20210921_MAGL2_TE_RO7527449_Brain_1_003	Standard 9	348.18 > 287.16	2	3.65	30309	199351	0.152	Standard	3.9	4.7	bb	20	YES	0.998	NO	5.09172
4	20210921_MAGL2_TE_RO7527449_Brain_1_004	Standard 8	348.18 > 287.16	2	3.65	18253	68496	0.266	Standard	7.8	8.5	bs	9.2	NO	0.998	NO	8.91051
5	20210921_MAGL2_TE_RO7527449_Brain_1_005	Standard 7	348.18 > 287.16	2	3.65	23998	46112	0.52	Standard	15.6	17	bb	9.1	NO	0.998	NO	17.419
6	20210921_MAGL2_TE_RO7527449_Brain_1_006	Standard 6	348.18 > 287.16	2	3.65	37913	40341	0.94	Standard	31.3	31.1	bs	-0.7	NO	0.998	NO	31.4883
7	20210921_MAGL2_TE_RO7527449_Brain_1_007	Standard 5	348.18 > 287.16	2	3.66	80515	42063	1.914	Standard	62.5	63.7	bb	1.9	NO	0.998	NO	64.1154
8	20210921_MAGL2_TE_RO7527449_Brain_1_008	Standard 4	348.18 > 287.16	2	3.65	164095	42318	3.878	Standard	125	129.5	bs	3.6	NO	0.998	NO	129.906
9	20210921_MAGL2_TE_RO7527449_Brain_1_009	Standard 3	348.18 > 287.16	2	3.65	261894	37244	7.032	Standard	250	235.1	bs	-5.9	NO	0.998	NO	235.559
10	20210921_MAGL2_TE_RO7527449_Brain_1_010	Standard 2	348.18 > 287.16	2	3.65	477518	31454	15.182	Standard	500	508.1	bs	1.6	NO	0.998	NO	508.569
11	20210921_MAGL2_TE_RO7527449_Brain_1_011	Standard 1	348.18 > 287.16	2	3.65	697295	29706	23.474	Standard	1000	785.9	bbX	-21.4	YES	0.998	NO	786.335
12	20210921_MAGL2_TE_RO7527449_Brain_1_012	Solvent (MeOH) dbl blank	348.18 > 287.16	2					Solvent					NO	0.998	NO	0
13	20210921_MAGL2_TE_RO7527449_Brain_1_013	Solvent (MeOH) dbl blank	348.18 > 287.16	2					Solvent					NO	0.998	NO	0
14	20210921_MAGL2_TE_RO7527449_Brain_1_014	Sample 1	348.18 > 287.16	2	3.65	325	37321	0.009	Analyte			bbI		NO	0.998	NO	0.301483
15	20210921_MAGL2_TE_RO7527449_Brain_1_015	Sample 2	348.18 > 287.16	2	3.65	658	57514	0.011	Analyte			bbI		NO	0.998	NO	0.36848
16	20210921_MAGL2_TE_RO7527449_Brain_1_016	Sample 3	348.18 > 287.16	2	3.65	447	64578	0.007	Analyte			bbI		NO	0.998	NO	0.234487
17	20210921_MAGL2_TE_RO7527449_Brain_1_017	Sample 4	348.18 > 287.16	2	3.65	431	51782	0.008	Analyte			bbI		NO	0.998	NO	0.267985
18	20210921_MAGL2_TE_RO7527449_Brain_1_018	Sample 5	348.18 > 287.16	2	3.65	456	45245	0.01	Analyte			bbI		NO	0.998	NO	0.334981
19	20210921_MAGL2_TE_RO7527449_Brain_1_019	Sample 6	348.18 > 287.16	2	3.65	492	37196	0.013	Analyte		0	bb		NO	0.998	NO	0.435476
20	20210921_MAGL2_TE_RO7527449_Brain_1_020	Sample 7	348.18 > 287.16	2	3.65	323	39259	0.008	Analyte			bbI		NO	0.998	NO	0.267985
21	20210921_MAGL2_TE_RO7527449_Brain_1_021	Sample 8	348.18 > 287.16	2	3.65	466	36361	0.013	Analyte		0	bb		NO	0.998	NO	0.435476
22	20210921_MAGL2_TE_RO7527449_Brain_1_022	Sample 9	348.18 > 287.16	2	3.65	312	34758	0.009	Analyte			bbI		NO	0.998	NO	0.301483
23	20210921_MAGL2_TE_RO7527449_Brain_1_023	Sample 10	348.18 > 287.16	2	3.65	226	26393	0.009	Analyte			bbI		NO	0.998	NO	0.301483
24	20210921_MAGL2_TE_RO7527449_Brain_1_024	Sample 11	348.18 > 287.16	2	3.65	268	28092	0.01	Analyte			bbI		NO	0.998	NO	0.334981
25	20210921_MAGL2_TE_RO7527449_Brain_1_025	Sample 12	348.18 > 287.16	2	3.65	257	29726	0.009	Analyte			bbI		NO	0.998	NO	0.301483
26	20210921_MAGL2_TE_RO7527449_Brain_1_026	Sample 13	348.18 > 287.16	2	3.65	303	30691	0.01	Analyte			bbI		NO	0.998	NO	0.334981
27	20210921_MAGL2_TE_RO7527449_Brain_1_027	Sample 14	348.18 > 287.16	2	3.66	258	30202	0.009	Analyte			bbI		NO	0.998	NO	0.301483
28	20210921_MAGL2_TE_RO7527449_Brain_1_028	Sample 15	348.18 > 287.16	2	3.65	170	30905	0.005	Analyte			bbI		NO	0.998	NO	0.167491
29	20210921_MAGL2_TE_RO7527449_Brain_1_029	Sample 16	348.18 > 287.16	2	3.65	550	31121	0.018	Analyte		0.2	bb		NO	0.998	NO	0.602967
30	20210921_MAGL2_TE_RO7527449_Brain_1_030	Sample 17	348.18 > 287.16	2	3.65	164	30713	0.005	Analyte			bbI		NO	0.998	NO	0.167491
31	20210921_MAGL2_TE_RO7527449_Brain_1_031	Sample 18	348.18 > 287.16	2	3.66	286	27392	0.01	Analyte			bbI		NO	0.998	NO	0.334981
32	20210921_MAGL2_TE_RO7527449_Brain_1_032	Solvent (MeOH) dbl blank	348.18 > 287.16	2					Solvent					NO	0.998	NO	0
33	20210921_MAGL2_TE_RO7527449_Brain_1_033	Solvent (MeOH) dbl blank	348.18 > 287.16	2					Solvent					NO	0.998	NO	0
Colon samples
100mg tissue/ml MeOH		nM = pmol/ml	2-AG, AA 1/100 diluted
2-Arachidonyl-glycerol
slope	0.00188047
	Name	Sample Text	Quan Trace	Inj. Vol	RT	Area	IS Area	Response	Type	Std. Conc	nM	Primary Flags	%Dev	Conc. Dev. Flagged	Coeff. Of Determination	CD Flag	2-AG (nM)
1	20210921_MAGL2_TE_RO7527449_Colon_2_001	Solvent (MeOH) dbl blank	379.24 > 287.21	2					Solvent					NO	0.994	NO	0
2	20210921_MAGL2_TE_RO7527449_Colon_2_002	Blank	379.24 > 287.21	2	3.93	16971	743473	0.023	Standard	0		MMI		NO	0.994	NO	12.231
3	20210921_MAGL2_TE_RO7527449_Colon_2_003	Standard 9	379.24 > 287.21	2	3.93	95787	866414	0.111	Standard	39	41.6	bb	6.6	NO	0.994	NO	59.0278
4	20210921_MAGL2_TE_RO7527449_Colon_2_004	Standard 8	379.24 > 287.21	2	3.93	163053	831705	0.196	Standard	78	87	bb	11.6	NO	0.994	NO	104.229
5	20210921_MAGL2_TE_RO7527449_Colon_2_005	Standard 7	379.24 > 287.21	2	3.93	301528	837727	0.36	Standard	156	174.2	bb	11.7	NO	0.994	NO	191.442
6	20210921_MAGL2_TE_RO7527449_Colon_2_006	Standard 6	379.24 > 287.21	2	3.93	570662	767737	0.743	Standard	312	378.1	bb	21.2	YES	0.994	NO	395.114
7	20210921_MAGL2_TE_RO7527449_Colon_2_007	Standard 5	379.24 > 287.21	2	3.93	1067089	827544	1.289	Standard	625	668.5	bb	7	NO	0.994	NO	685.467
8	20210921_MAGL2_TE_RO7527449_Colon_2_008	Standard 4	379.24 > 287.21	2	3.93	1994555	825601	2.416	Standard	1250	1267.5	bb	1.4	NO	0.994	NO	1284.79
9	20210921_MAGL2_TE_RO7527449_Colon_2_009	Standard 3	379.24 > 287.21	2	3.93	3135334	697388	4.496	Standard	2500	2373.6	bb	-5.1	NO	0.994	NO	2390.89
10	20210921_MAGL2_TE_RO7527449_Colon_2_010	Standard 2	379.24 > 287.21	2	3.93	3643714	624289	5.837	Standard	5000	3086.6	bbX	-38.3	YES	0.994	NO	3104.01
11	20210921_MAGL2_TE_RO7527449_Colon_2_011	Standard 1	379.24 > 287.21	2	3.93	6886131	531897	12.946	Standard	10000	6867.4	bbX	-31.3	YES	0.994	NO	6884.45
12	20210921_MAGL2_TE_RO7527449_Colon_2_012	Solvent (MeOH) dbl blank	379.24 > 287.21	2	3.93	2224			Solvent			bb		NO	0.994	NO	0
13	20210921_MAGL2_TE_RO7527449_Colon_2_013	Solvent (MeOH) dbl blank	379.24 > 287.21	2					Solvent					NO	0.994	NO	0
14	20210921_MAGL2_TE_RO7527449_Colon_2_014	Sample 1	379.24 > 287.21	2	3.93	11219	974078	0.012	Analyte			MMI		NO	0.994	NO	6.38138
15	20210921_MAGL2_TE_RO7527449_Colon_2_015	Sample 2	379.24 > 287.21	2	3.93	12397	976891	0.013	Analyte			MMI		NO	0.994	NO	6.91317
16	20210921_MAGL2_TE_RO7527449_Colon_2_016	Sample 3	379.24 > 287.21	2	3.93	10678	1105942	0.01	Analyte			MMI		NO	0.994	NO	5.31782
17	20210921_MAGL2_TE_RO7527449_Colon_2_017	Sample 4	379.24 > 287.21	2	3.93	13579	1011454	0.013	Analyte			MMI		NO	0.994	NO	6.91317
18	20210921_MAGL2_TE_RO7527449_Colon_2_018	Sample 5	379.24 > 287.21	2	3.93	10606	995627	0.011	Analyte			MMI		NO	0.994	NO	5.8496
19	20210921_MAGL2_TE_RO7527449_Colon_2_019	Sample 6	379.24 > 287.21	2	3.93	12770	973159	0.013	Analyte			MMI		NO	0.994	NO	6.91317
20	20210921_MAGL2_TE_RO7527449_Colon_2_020	Sample 7	379.24 > 287.21	2	3.93	28803	1012799	0.028	Analyte			MMI		NO	0.994	NO	14.8899
21	20210921_MAGL2_TE_RO7527449_Colon_2_021	Sample 8	379.24 > 287.21	2	3.93	35338	988697	0.036	Analyte		1.8	MM		NO	0.994	NO	19.1442
22	20210921_MAGL2_TE_RO7527449_Colon_2_022	Sample 9	379.24 > 287.21	2	3.93	32155	1098870	0.029	Analyte			bbI		NO	0.994	NO	15.4217
23	20210921_MAGL2_TE_RO7527449_Colon_2_023	Sample 10	379.24 > 287.21	2	3.93	24577	1002759	0.025	Analyte			bbI		NO	0.994	NO	13.2945
24	20210921_MAGL2_TE_RO7527449_Colon_2_024	Sample 11	379.24 > 287.21	2	3.93	18726	997072	0.019	Analyte			MMI		NO	0.994	NO	10.1039
25	20210921_MAGL2_TE_RO7527449_Colon_2_025	Sample 12	379.24 > 287.21	2	3.93	41132	1059663	0.039	Analyte		3.4	MM		NO	0.994	NO	20.7395
26	20210921_MAGL2_TE_RO7527449_Colon_2_026	Sample 13	379.24 > 287.21	2	3.93	13962	940535	0.015	Analyte			MMI		NO	0.994	NO	7.97673
27	20210921_MAGL2_TE_RO7527449_Colon_2_027	Sample 14	379.24 > 287.21	2	3.93	21882	924324	0.024	Analyte			MMI		NO	0.994	NO	12.7628
28	20210921_MAGL2_TE_RO7527449_Colon_2_028	Sample 15	379.24 > 287.21	2	3.93	16804	991089	0.017	Analyte			MMI		NO	0.994	NO	9.04029
29	20210921_MAGL2_TE_RO7527449_Colon_2_029	Sample 16	379.24 > 287.21	2	3.93	21392	1013297	0.021	Analyte			MMI		NO	0.994	NO	11.1674
30	20210921_MAGL2_TE_RO7527449_Colon_2_030	Sample 17	379.24 > 287.21	2	3.93	22926	1041290	0.022	Analyte			MMI		NO	0.994	NO	11.6992
31	20210921_MAGL2_TE_RO7527449_Colon_2_031	Sample 18	379.24 > 287.21	2	3.93	23958	1041850	0.023	Analyte			MMI		NO	0.994	NO	12.231
32	20210921_MAGL2_TE_RO7527449_Colon_2_032	Solvent (MeOH) dbl blank	379.24 > 287.21	2					Solvent					NO	0.994	NO	0
33	20210921_MAGL2_TE_RO7527449_Colon_2_033	Solvent (MeOH) dbl blank	379.24 > 287.21	2					Solvent					NO	0.994	NO	0
Arachidonic acid
slope	0.0018532
	Name	Sample Text	Quan Trace	Inj. Vol	RT	Area	IS Area	Response	Type	Std. Conc	nM	Primary Flags	%Dev	Conc. Dev. Flagged	Coeff. Of Determination	CD Flag	AA (nM)
1	20210921_MAGL2_TE_RO7527449_Colon_2_001	Solvent (MeOH) dbl blank	303.14 > 259.16	2					Solvent					NO	0.992	NO	0
2	20210921_MAGL2_TE_RO7527449_Colon_2_002	Blank	303.14 > 259.16	2	4.46	3145	35845	0.088	Standard	0		bbI		NO	0.992	NO	47.4854
3	20210921_MAGL2_TE_RO7527449_Colon_2_003	Standard 9	303.14 > 259.16	2	4.46	10777	41893	0.257	Standard	78	83.4	bb	6.9	NO	0.992	NO	138.679
4	20210921_MAGL2_TE_RO7527449_Colon_2_004	Standard 8	303.14 > 259.16	2	4.46	17254	40502	0.426	Standard	156	174.5	bb	11.8	NO	0.992	NO	229.873
5	20210921_MAGL2_TE_RO7527449_Colon_2_005	Standard 7	303.14 > 259.16	2	4.46	27806	39761	0.699	Standard	312	321.9	bb	3.2	NO	0.992	NO	377.185
6	20210921_MAGL2_TE_RO7527449_Colon_2_006	Standard 6	303.14 > 259.16	2	4.46	50946	36861	1.382	Standard	625	690.4	bb	10.5	NO	0.992	NO	745.737
7	20210921_MAGL2_TE_RO7527449_Colon_2_007	Standard 5	303.14 > 259.16	2	4.46	91091	40020	2.276	Standard	1250	1172.8	bb	-6.2	NO	0.992	NO	1228.15
8	20210921_MAGL2_TE_RO7527449_Colon_2_008	Standard 4	303.14 > 259.16	2	4.46	165092	41536	3.975	Standard	2500	2089.3	bbX	-16.4	YES	0.992	NO	2144.94
9	20210921_MAGL2_TE_RO7527449_Colon_2_009	Standard 3	303.14 > 259.16	2	4.46	253797	35983	7.053	Standard	5000	3750.5	bbX	-25	YES	0.992	NO	3805.85
10	20210921_MAGL2_TE_RO7527449_Colon_2_010	Standard 2	303.14 > 259.16	2	4.46	293017	33823	8.663	Standard	10000	4619.4	bbX	-53.8	YES	0.992	NO	4674.62
11	20210921_MAGL2_TE_RO7527449_Colon_2_011	Standard 1	303.14 > 259.16	2	4.46	550512	27996	19.664	Standard	20000	10555.6	bbX	-47.2	YES	0.992	NO	10610.8
12	20210921_MAGL2_TE_RO7527449_Colon_2_012	Solvent (MeOH) dbl blank	303.14 > 259.16	2	4.46	1028			Solvent			bb		NO	0.992	NO	0
13	20210921_MAGL2_TE_RO7527449_Colon_2_013	Solvent (MeOH) dbl blank	303.14 > 259.16	2					Solvent					NO	0.992	NO	0
14	20210921_MAGL2_TE_RO7527449_Colon_2_014	Sample 1	303.14 > 259.16	2	4.46	3823	49565	0.077	Analyte			bbI		NO	0.992	NO	41.5498
15	20210921_MAGL2_TE_RO7527449_Colon_2_015	Sample 2	303.14 > 259.16	2	4.46	4253	49325	0.086	Analyte			bbI		NO	0.992	NO	46.4062
16	20210921_MAGL2_TE_RO7527449_Colon_2_016	Sample 3	303.14 > 259.16	2	4.46	4195	52120	0.08	Analyte			bbI		NO	0.992	NO	43.1686
17	20210921_MAGL2_TE_RO7527449_Colon_2_017	Sample 4	303.14 > 259.16	2	4.46	4502	47290	0.095	Analyte			bbI		NO	0.992	NO	51.2627
18	20210921_MAGL2_TE_RO7527449_Colon_2_018	Sample 5	303.14 > 259.16	2	4.46	4257	45795	0.093	Analyte			bbI		NO	0.992	NO	50.1835
19	20210921_MAGL2_TE_RO7527449_Colon_2_019	Sample 6	303.14 > 259.16	2	4.46	5654	46595	0.121	Analyte		10.1	bb		NO	0.992	NO	65.2925
20	20210921_MAGL2_TE_RO7527449_Colon_2_020	Sample 7	303.14 > 259.16	2	4.46	4013	49734	0.081	Analyte			bbI		NO	0.992	NO	43.7082
21	20210921_MAGL2_TE_RO7527449_Colon_2_021	Sample 8	303.14 > 259.16	2	4.46	3543	49443	0.072	Analyte			bbI		NO	0.992	NO	38.8517
22	20210921_MAGL2_TE_RO7527449_Colon_2_022	Sample 9	303.14 > 259.16	2	4.46	3577	52865	0.068	Analyte			bbI		NO	0.992	NO	36.6933
23	20210921_MAGL2_TE_RO7527449_Colon_2_023	Sample 10	303.14 > 259.16	2	4.46	3060	52019	0.059	Analyte			bbI		NO	0.992	NO	31.8368
24	20210921_MAGL2_TE_RO7527449_Colon_2_024	Sample 11	303.14 > 259.16	2	4.46	1734	52282	0.033	Analyte			bbI		NO	0.992	NO	17.807
25	20210921_MAGL2_TE_RO7527449_Colon_2_025	Sample 12	303.14 > 259.16	2	4.46	5229	52413	0.1	Analyte			bbI		NO	0.992	NO	53.9607
26	20210921_MAGL2_TE_RO7527449_Colon_2_026	Sample 13	303.14 > 259.16	2	4.46	3094	46570	0.066	Analyte			bbI		NO	0.992	NO	35.6141
27	20210921_MAGL2_TE_RO7527449_Colon_2_027	Sample 14	303.14 > 259.16	2	4.46	3469	44873	0.077	Analyte			bbI		NO	0.992	NO	41.5498
28	20210921_MAGL2_TE_RO7527449_Colon_2_028	Sample 15	303.14 > 259.16	2	4.46	3456	47174	0.073	Analyte			bbI		NO	0.992	NO	39.3913
29	20210921_MAGL2_TE_RO7527449_Colon_2_029	Sample 16	303.14 > 259.16	2	4.46	4610	47769	0.097	Analyte			bbI		NO	0.992	NO	52.3419
30	20210921_MAGL2_TE_RO7527449_Colon_2_030	Sample 17	303.14 > 259.16	2	4.46	4074	47926	0.085	Analyte			bbI		NO	0.992	NO	45.8666
31	20210921_MAGL2_TE_RO7527449_Colon_2_031	Sample 18	303.14 > 259.16	2	4.46	4798	50101	0.096	Analyte			bbI		NO	0.992	NO	51.8023
32	20210921_MAGL2_TE_RO7527449_Colon_2_032	Solvent (MeOH) dbl blank	303.14 > 259.16	2					Solvent					NO	0.992	NO	0
33	20210921_MAGL2_TE_RO7527449_Colon_2_033	Solvent (MeOH) dbl blank	303.14 > 259.16	2					Solvent					NO	0.992	NO	0
Anandamide
slope	0.0280899
	Name	Sample Text	Quan Trace	Inj. Vol	RT	Area	IS Area	Response	Type	Std. Conc	nM	Primary Flags	%Dev	Conc. Dev. Flagged	Coeff. Of Determination	CD Flag	AEA (nM)
1	20210921_MAGL2_TE_RO7527449_Colon_1_001	Solvent (MeOH) dbl blank	348.18 > 287.16	2					Solvent					NO	0.997	NO	0
2	20210921_MAGL2_TE_RO7527449_Colon_1_002	Blank	348.18 > 287.16	2	3.65	535	55442	0.01	Standard	0		bbI		NO	0.997	NO	0.356
3	20210921_MAGL2_TE_RO7527449_Colon_1_003	Standard 9	348.18 > 287.16	2	3.65	10286	66812	0.154	Standard	3.9	5	bbX	29.1	YES	0.997	NO	5.4824
4	20210921_MAGL2_TE_RO7527449_Colon_1_004	Standard 8	348.18 > 287.16	2	3.65	17695	69274	0.255	Standard	7.8	8.6	bb	10.9	NO	0.997	NO	9.078
5	20210921_MAGL2_TE_RO7527449_Colon_1_005	Standard 7	348.18 > 287.16	2	3.65	34806	67709	0.514	Standard	15.6	17.9	bb	14.5	NO	0.997	NO	18.2984
6	20210921_MAGL2_TE_RO7527449_Colon_1_006	Standard 6	348.18 > 287.16	2	3.65	55836	59599	0.937	Standard	31.3	32.9	bb	5.1	NO	0.997	NO	33.3572
7	20210921_MAGL2_TE_RO7527449_Colon_1_007	Standard 5	348.18 > 287.16	2	3.65	121594	66247	1.835	Standard	62.5	64.9	bb	3.8	NO	0.997	NO	65.326
8	20210921_MAGL2_TE_RO7527449_Colon_1_008	Standard 4	348.18 > 287.16	2	3.65	248554	67305	3.693	Standard	125	131	bb	4.8	NO	0.997	NO	131.471
9	20210921_MAGL2_TE_RO7527449_Colon_1_009	Standard 3	348.18 > 287.16	2	3.65	435507	64921	6.708	Standard	250	238.4	bb	-4.7	NO	0.997	NO	238.805
10	20210921_MAGL2_TE_RO7527449_Colon_1_010	Standard 2	348.18 > 287.16	2	3.65	738484	59291	12.455	Standard	500	443	bbX	-11.4	NO	0.997	NO	443.398
11	20210921_MAGL2_TE_RO7527449_Colon_1_011	Standard 1	348.18 > 287.16	2	3.65	1508533	67322	22.408	Standard	1000	797.3	bbX	-20.3	YES	0.997	NO	797.724
12	20210921_MAGL2_TE_RO7527449_Colon_1_012	Solvent (MeOH) dbl blank	348.18 > 287.16	2	3.64	163			Solvent			bb		NO	0.997	NO	0
13	20210921_MAGL2_TE_RO7527449_Colon_1_013	Solvent (MeOH) dbl blank	348.18 > 287.16	2	3.64	105			Solvent			bb		NO	0.997	NO	0
14	20210921_MAGL2_TE_RO7527449_Colon_1_014	Sample 1	348.18 > 287.16	2	3.65	692	89577	0.008	Analyte			bbI		NO	0.997	NO	0.2848
15	20210921_MAGL2_TE_RO7527449_Colon_1_015	Sample 2	348.18 > 287.16	2	3.65	1487	97750	0.015	Analyte		0.1	bb		NO	0.997	NO	0.534
16	20210921_MAGL2_TE_RO7527449_Colon_1_016	Sample 3	348.18 > 287.16	2	3.65	1016	96432	0.011	Analyte			bbI		NO	0.997	NO	0.3916
17	20210921_MAGL2_TE_RO7527449_Colon_1_017	Sample 4	348.18 > 287.16	2	3.65	1365	87440	0.016	Analyte		0.1	bb		NO	0.997	NO	0.5696
18	20210921_MAGL2_TE_RO7527449_Colon_1_018	Sample 5	348.18 > 287.16	2	3.65	489	76162	0.006	Analyte			bbI		NO	0.997	NO	0.2136
19	20210921_MAGL2_TE_RO7527449_Colon_1_019	Sample 6	348.18 > 287.16	2	3.65	502	66045	0.008	Analyte			bbI		NO	0.997	NO	0.2848
20	20210921_MAGL2_TE_RO7527449_Colon_1_020	Sample 7	348.18 > 287.16	2	3.66	449	64813	0.007	Analyte			bbI		NO	0.997	NO	0.2492
21	20210921_MAGL2_TE_RO7527449_Colon_1_021	Sample 8	348.18 > 287.16	2	3.65	552	65814	0.008	Analyte			bbI		NO	0.997	NO	0.2848
22	20210921_MAGL2_TE_RO7527449_Colon_1_022	Sample 9	348.18 > 287.16	2	3.65	358	59488	0.006	Analyte			bbI		NO	0.997	NO	0.2136
23	20210921_MAGL2_TE_RO7527449_Colon_1_023	Sample 10	348.18 > 287.16	2	3.65	407	59752	0.007	Analyte			bbI		NO	0.997	NO	0.2492
24	20210921_MAGL2_TE_RO7527449_Colon_1_024	Sample 11	348.18 > 287.16	2	3.66	506	63011	0.008	Analyte			bbI		NO	0.997	NO	0.2848
25	20210921_MAGL2_TE_RO7527449_Colon_1_025	Sample 12	348.18 > 287.16	2	3.65	801	66607	0.012	Analyte			bbI		NO	0.997	NO	0.4272
26	20210921_MAGL2_TE_RO7527449_Colon_1_026	Sample 13	348.18 > 287.16	2	3.65	333	65098	0.005	Analyte			bbI		NO	0.997	NO	0.178
27	20210921_MAGL2_TE_RO7527449_Colon_1_027	Sample 14	348.18 > 287.16	2	3.65	458	65135	0.007	Analyte			bbI		NO	0.997	NO	0.2492
28	20210921_MAGL2_TE_RO7527449_Colon_1_028	Sample 15	348.18 > 287.16	2	3.65	429	69499	0.006	Analyte			bbI		NO	0.997	NO	0.2136
29	20210921_MAGL2_TE_RO7527449_Colon_1_029	Sample 16	348.18 > 287.16	2	3.65	1196	72474	0.017	Analyte		0.1	bb		NO	0.997	NO	0.6052
30	20210921_MAGL2_TE_RO7527449_Colon_1_030	Sample 17	348.18 > 287.16	2	3.65	577	66962	0.009	Analyte			bbI		NO	0.997	NO	0.3204
31	20210921_MAGL2_TE_RO7527449_Colon_1_031	Sample 18	348.18 > 287.16	2	3.65	532	67270	0.008	Analyte			bbI		NO	0.997	NO	0.2848
32	20210921_MAGL2_TE_RO7527449_Colon_1_032	Solvent (MeOH) dbl blank	348.18 > 287.16	2					Solvent					NO	0.997	NO	0
33	20210921_MAGL2_TE_RO7527449_Colon_1_033	Solvent (MeOH) dbl blank	348.18 > 287.16	2					Solvent					NO	0.997	NO	0

[truncated: 36 more sheets: Figure 4b,c,d simplified, Figure 5a & S6a, Figure 5c & S6c, Figure 5e & S6e, Figure 5g & S6g, Figure S2a, Figure S2b, Figure S5 (lung), Figure S5 (liver), Figure 6A DATA, % Change Function Males 6A, %Change Function Females 6A, Figure 6B DATA, Figure 6C DATA, Figure 6D DATA, % Change Function Males 6D, % Change Function Females 6D, Figure 6E DATA, Figure 6F DATA, Figure 7A DATA …]
